# Supplementary material for: Sublethal heat treatment promotes breast cancer metastasis and its molecular mechanism revealed by quantitative proteomic analysis
Source: publisher site journal article supplement (doi:10.18632/aging.203884), 2022-02-12
Supplement: Supplementary file [file aging-v14i3-203884-supplementary-material-SD1.pdf]

**SUPPLEMENTARY FIGURE**

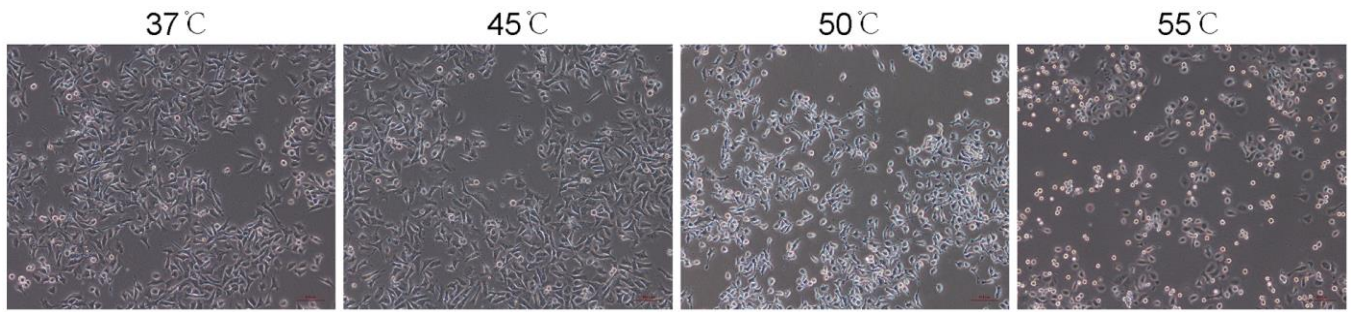

**Supplementary Figure 1. The effects of different temperatures on the state of 4T1 cells were observed under microscope.**
