# Supplementary material for: Sublethal heat treatment promotes breast cancer metastasis and its molecular mechanism revealed by quantitative proteomic analysis
Source: publisher site journal article supplement (doi:10.18632/aging.203884), 2022-02-12
Supplement: Supplementary file [file aging-v14i3-203884-supplementary-material-SD6.pdf]

**Supplementary Table 6. KEGG.top.up.**

| <b>Id</b> | <b>Term</b>                                              | <b>pval</b>           | <b>Enrichment_score</b> | <b>Protein_gene</b>                            |
|-----------|----------------------------------------------------------|-----------------------|-------------------------|------------------------------------------------|
| mmu00040  | Pentose and glucuronate interconversions                 | 0                     | 22.9459459459459        | P45377:Akr1b8                                  |
| mmu03020  | RNA polymerase                                           | 0.0000977738049485203 | 9.83397683397683        | P60898:Polr2i; P52432:Polr1c;<br>Q923G2:Polr2h |
| mmu05322  | Systemic lupus erythematosus                             | 0.00018944513170987   | 8.60472972972973        | P62315:Snrpd1; P84244:H3f3a;<br>P84244:H3f3b   |
| mmu04623  | Cytosolic DNA-sensing pathway                            | 0.000296587969002751  | 11.472972972973         | P52432:Polr1c; Q923G2:Polr2h                   |
| mmu04550  | Signaling pathways regulating pluripotency of stem cells | 0.000719146017537135  | 9.17837837837838        | P23798:Pcgf2; Q63844:Mapk3                     |
| mmu00790  | Folate biosynthesis                                      | 0.0018501233415561    | 11.472972972973         | P45377:Akr1b8                                  |
| mmu05034  | Alcoholism                                               | 0.00296009673583045   | 4.58918918918919        | P84244:H3f3a; P84244:H3f3b;<br>Q63844:Mapk3    |
| mmu04914  | Progesterone-mediated oocyte maturation                  | 0.00367511252103553   | 5.73648648648649        | A2A6Q5:Cdc27; Q63844:Mapk3                     |
| mmu04666  | Fc gamma R-mediated phagocytosis                         | 0.00534748682732911   | 5.0990990990991         | Q9D898:Arpc5i; Q63844:Mapk3                    |
| mmu03460  | Fanconi anemia pathway                                   | 0.0053974672691678    | 7.64864864864865        | Q8BH57:Wdr48                                   |
| mmu00920  | Sulfur metabolism                                        | 0.0053974672691678    | 7.64864864864865        | Q80V26:Impad1                                  |
| mmu01521  | EGFR tyrosine kinase inhibitor resistance                | 0.0053974672691678    | 7.64864864864865        | Q63844:Mapk3                                   |
| mmu04620  | Toll-like receptor signaling pathway                     | 0.0053974672691678    | 7.64864864864865        | Q63844:Mapk3                                   |
| mmu04658  | Th1 and Th2 cell differentiation                         | 0.0053974672691678    | 7.64864864864865        | Q63844:Mapk3                                   |
| mmu04659  | Th17 cell differentiation                                | 0.0053974672691678    | 7.64864864864865        | Q63844:Mapk3                                   |
| mmu04664  | Fc epsilon RI signaling pathway                          | 0.0053974672691678    | 7.64864864864865        | Q63844:Mapk3                                   |
| mmu05216  | Thyroid cancer                                           | 0.0053974672691678    | 7.64864864864865        | Q63844:Mapk3                                   |
| mmu05218  | Melanoma                                                 | 0.0053974672691678    | 7.64864864864865        | Q63844:Mapk3                                   |
| mmu05219  | Bladder cancer                                           | 0.0053974672691678    | 7.64864864864865        | Q63844:Mapk3                                   |
| mmu05223  | Non-small cell lung cancer                               | 0.0053974672691678    | 7.64864864864865        | Q63844:Mapk3                                   |

**Supplementary Table 7. KEGG.top.down.**

| <b>Id</b> | <b>Term</b>                                      | <b>pval</b>           | <b>Enrichment_score</b> | <b>Protein_gene</b>                                                                                          |
|-----------|--------------------------------------------------|-----------------------|-------------------------|--------------------------------------------------------------------------------------------------------------|
| mmu05032  | Morphine addiction                               | 0.00000119374883178   | 13.8048780487805        | Q3UYH7:Adrbk2; P68181:Prkacb;<br>Q9CXP8:Gng10; P63213:Gng2                                                   |
| mmu04340  | Hedgehog signaling pathway                       | 4.71123465396585E-06  | 15.530487804878         | Q3UYH7:Adrbk2; P68181:Prkacb;<br>Q8BVP5:Csnk1g2                                                              |
| mmu04740  | Olfactory transduction                           | 4.71123465396585E-06  | 15.530487804878         | Q3UYH7:Adrbk2; Q6PHZ2:Camk2d;<br>P68181:Prkacb                                                               |
| mmu04062  | Chemokine signaling pathway                      | 6.54076473409003E-06  | 8.62804878048781        | Q3UYH7:Adrbk2; P68181:Prkacb;<br>Q9CXP8:Gng10; P63213:Gng2; P60766:Cdc42                                     |
| mmu05034  | Alcoholism                                       | 0.0000317737498516404 | 6.90243902439024        | Q9CXP8:Gng10; P62141:PPP1cb; P63213:Gng2;<br>P27661:H2afx; Q9QZQ8:H2afy                                      |
| mmu04142  | Lysosome                                         | 0.0000433809350810006 | 8.28292682926829        | O35114:Scarb2; P51863:AtP6v0d1;<br>P15920:AtP6v0a2; P22892:Ap1g1                                             |
| mmu04725  | Cholinergic synapse                              | 0.0000433809350810006 | 8.28292682926829        | Q6PHZ2:Camk2d; P68181:Prkacb;<br>Q9CXP8:Gng10; P63213:Gng2                                                   |
| mmu04728  | Dopaminergic synapse                             | 0.0000490250173998093 | 6.47103658536585        | Q6PHZ2:Camk2d; P68181:Prkacb;<br>Q9CXP8:Gng10; P62141:PPP1cb; P63213:Gng2                                    |
| mmu04723  | Retrograde endocannabinoid signaling             | 0.0000511543321342115 | 4.67584579071597        | Q9DCS9:Ndufb10; Q9ERS2:Ndufa13;<br>P68181:Prkacb; Q9CXP8:Gng10;<br>Q9Z1P6:Ndufa7; P63213:Gng2; Q9CQ91:Ndufa3 |
| mmu05031  | Amphetamine addiction                            | 0.0000658055331679858 | 10.3536585365854        | Q6PHZ2:Camk2d; P68181:Prkacb;<br>P62141:PPP1cb                                                               |
| mmu04713  | Circadian entrainment                            | 0.0000767057005718373 | 7.52993348115299        | Q6PHZ2:Camk2d; P68181:Prkacb;<br>Q9CXP8:Gng10; P63213:Gng2                                                   |
| mmu05200  | Pathways in cancer                               | 0.000132144111739917  | 4.14146341463415        | P61025:Cks1b; Q6PHZ2:Camk2d;<br>P68181:Prkacb; Q61301:Ctnna2;<br>Q9CXP8:Gng10; P63213:Gng2; P60766:Cdc42     |
| mmu05323  | Rheumatoid arthritis                             | 0.000148173422729048  | 8.87456445993031        | P51863:AtP6v0d1; P15920:AtP6v0a2;<br>P28862:Mmp3                                                             |
| mmu04724  | Glutamatergic synapse                            | 0.000198766821672066  | 6.37148217636023        | Q3UYH7:Adrbk2; P68181:Prkacb;<br>Q9CXP8:Gng10; P63213:Gng2                                                   |
| mmu05203  | Viral carcinogenesis                             | 0.000277018125999705  | 4.93031358885017        | P51943:Ccna2; P51863:AtP6v0d1;<br>A2AN08:Ubr4; P68181:Prkacb; P60766:Cdc42                                   |
| mmu04750  | Inflammatory mediator regulation of TRP channels | 0.000285983119188843  | 7.76524390243902        | Q6PHZ2:Camk2d; P68181:Prkacb;<br>P62141:PPP1cb                                                               |
| mmu04727  | GABAergic synapse                                | 0.000496777879623897  | 6.90243902439024        | P68181:Prkacb; Q9CXP8:Gng10; P63213:Gng2                                                                     |
| mmu05165  | Human papillomavirus infection                   | 0.000497925231416475  | 3.88262195121951        | P51943:Ccna2; P51863:AtP6v0d1;<br>P15920:AtP6v0a2; A2AN08:Ubr4;<br>P68181:Prkacb; P60766:Cdc42               |
| mmu04912  | GnRH signaling pathway                           | 0.000799042509319161  | 6.21219512195122        | Q6PHZ2:Camk2d; P68181:Prkacb;<br>P60766:Cdc42                                                                |
| mmu04926  | Relaxin signaling pathway                        | 0.000799042509319161  | 6.21219512195122        | P68181:Prkacb; Q9CXP8:Gng10; P63213:Gng2                                                                     |
