# Supplementary material for: Sublethal heat treatment promotes breast cancer metastasis and its molecular mechanism revealed by quantitative proteomic analysis
Source: Aging (Albany NY). 2022 Feb 12;14(3):1389–406. doi: 10.18632/aging.203884 (PMC8876919; doi:10.18632/aging.203884)
Supplement: Supplementary Table 1 [file aging-14-203884-s002.xls]

## Sheet: protein expression
Protein IDs	Majority protein IDs	Fasta headers	Protein ID	GN	Protein names	Number of proteins	Peptides	Unique peptides	Sequence coverage [%]	Mol. weight [kDa]	LFQ intensity_A1	LFQ intensity_A2	LFQ intensity_A3	LFQ intensity_B1	LFQ intensity_B2	LFQ intensity_B3	ratio_B/A	p value
tr|Q14AZ9|Q14AZ9_MOUSE;sp|Q8BGC4|PTGR3_MOUSE;tr|Q8R0Z8|Q8R0Z8_MOUSE;tr|Q3UY81|Q3UY81_MOUSE	tr|Q14AZ9|Q14AZ9_MOUSE;sp|Q8BGC4|PTGR3_MOUSE	tr|Q14AZ9|Q14AZ9_MOUSE Zinc binding alcohol dehydrogenase, domain containing 2 OS=Mus musculus OX=10090 GN=Zadh2 PE=1 SV=1;sp|Q8BGC4|PTGR3_MOUSE Prostaglandin reductase-3 OS=Mus musculus OX=10090 GN=Zadh2 PE=1 SV=1	Q14AZ9	Zadh2 mCG_120307	Zinc binding alcohol dehydrogenase, domain containing 2	4	11	11	38.7	40.528	176590000	176620000	172200000	219490000	222390000	226420000	1.27196	4.39192e-05
sp|P60766|CDC42_MOUSE	sp|P60766|CDC42_MOUSE	sp|P60766|CDC42_MOUSE Cell division control protein 42 homolog OS=Mus musculus OX=10090 GN=Cdc42 PE=1 SV=2	P60766	Cdc42	Cell division control protein 42 homolog (EC 3.6.5.2) (G25K GTP-binding protein)	1	9	1	48.2	21.258	1427000000	1429500000	1444100000	1179700000	1216100000	1173500000	0.829954	6.97966e-05
tr|Q4FJK0|Q4FJK0_MOUSE;sp|Q9CQ62|DECR_MOUSE	tr|Q4FJK0|Q4FJK0_MOUSE;sp|Q9CQ62|DECR_MOUSE	tr|Q4FJK0|Q4FJK0_MOUSE Decr1 protein OS=Mus musculus OX=10090 GN=Decr1 PE=1 SV=1;sp|Q9CQ62|DECR_MOUSE 2,4-dienoyl-CoA reductase, mitochondrial OS=Mus musculus OX=10090 GN=Decr1 PE=1 SV=1	Q4FJK0	Decr1	Decr1 protein	2	3	3	13.4	36.213	NaN	19283000	19673000	23784000	23582000	23957000	1.22057	0.000226493
sp|Q9CYN2|SPCS2_MOUSE;tr|A0A140LHG8|A0A140LHG8_MOUSE;tr|A0A140LJ01|A0A140LJ01_MOUSE;tr|A0A140LHR3|A0A140LHR3_MOUSE;tr|A0A140LIK0|A0A140LIK0_MOUSE;tr|A0A140LJG6|A0A140LJG6_MOUSE;tr|A0A140LHW5|A0A140LHW5_MOUSE	sp|Q9CYN2|SPCS2_MOUSE;tr|A0A140LHG8|A0A140LHG8_MOUSE;tr|A0A140LJ01|A0A140LJ01_MOUSE;tr|A0A140LHR3|A0A140LHR3_MOUSE;tr|A0A140LIK0|A0A140LIK0_MOUSE;tr|A0A140LJG6|A0A140LJG6_MOUSE	sp|Q9CYN2|SPCS2_MOUSE Signal peptidase complex subunit 2 OS=Mus musculus OX=10090 GN=Spcs2 PE=1 SV=1;tr|A0A140LHG8|A0A140LHG8_MOUSE Signal peptidase complex subunit 2 OS=Mus musculus OX=10090 GN=Spcs2 PE=1 SV=1;tr|A0A140LJ01|A0A140LJ01_MOUSE Signal peptida	Q9CYN2	Spcs2 Spc25	Signal peptidase complex subunit 2 (EC 3.4.-.-) (Microsomal signal peptidase 25 kDa subunit) (SPase 25 kDa subunit)	7	10	10	50.9	24.977	588590000	586890000	583610000	527170000	509590000	512880000	0.880933	0.000236444
tr|E9PV44|E9PV44_MOUSE;sp|O35143|ATIF1_MOUSE;tr|Q8BTA7|Q8BTA7_MOUSE	tr|E9PV44|E9PV44_MOUSE;sp|O35143|ATIF1_MOUSE	tr|E9PV44|E9PV44_MOUSE ATPase inhibitory factor 1 OS=Mus musculus OX=10090 GN=Atpif1 PE=1 SV=1;sp|O35143|ATIF1_MOUSE ATPase inhibitor, mitochondrial OS=Mus musculus OX=10090 GN=ATP5IF1 PE=1 SV=2	E9PV44	Atpif1	ATPase inhibitory factor 1	3	6	6	58.1	8.7887	515200000	527200000	516990000	380820000	412810000	383990000	0.75518	0.000301276
sp|Q9CXY9|GPI8_MOUSE;tr|Q8BL63|Q8BL63_MOUSE;tr|E9Q421|E9Q421_MOUSE;tr|Q8BXX3|Q8BXX3_MOUSE;tr|Q3TGN0|Q3TGN0_MOUSE;tr|Q80V43|Q80V43_MOUSE;tr|Q3TUE9|Q3TUE9_MOUSE;tr|A0A0G2JEZ9|A0A0G2JEZ9_MOUSE	sp|Q9CXY9|GPI8_MOUSE;tr|Q8BL63|Q8BL63_MOUSE;tr|E9Q421|E9Q421_MOUSE;tr|Q8BXX3|Q8BXX3_MOUSE;tr|Q3TGN0|Q3TGN0_MOUSE;tr|Q80V43|Q80V43_MOUSE	sp|Q9CXY9|GPI8_MOUSE GPI-anchor transamidase OS=Mus musculus OX=10090 GN=Pigk PE=1 SV=2;tr|Q8BL63|Q8BL63_MOUSE GPI-anchor transamidase OS=Mus musculus OX=10090 GN=Pigk PE=1 SV=1;tr|E9Q421|E9Q421_MOUSE GPI-anchor transamidase OS=Mus musculus OX=10090 GN=Pig	Q9CXY9	Pigk	GPI-anchor transamidase (GPI transamidase) (EC 3.-.-.-) (Phosphatidylinositol-glycan biosynthesis class K protein) (PIG-K)	8	13	13	48.1	44.895	199910000	206280000	199600000	162000000	169100000	161460000	0.813087	0.000327986
sp|Q8BHE8|MAIP1_MOUSE	sp|Q8BHE8|MAIP1_MOUSE	sp|Q8BHE8|MAIP1_MOUSE m-AAA protease-interacting protein 1, mitochondrial OS=Mus musculus OX=10090 GN=Maip1 PE=1 SV=1	Q8BHE8	Maip1	m-AAA protease-interacting protein 1, mitochondrial (Matrix AAA peptidase-interacting protein 1)	1	3	3	12	32.985	47840000	44707000	47933000	35121000	34824000	34892000	0.746277	0.000366093
sp|Q8BFZ3|ACTBL_MOUSE	sp|Q8BFZ3|ACTBL_MOUSE	sp|Q8BFZ3|ACTBL_MOUSE Beta-actin-like protein 2 OS=Mus musculus OX=10090 GN=Actbl2 PE=1 SV=1	Q8BFZ3	Actbl2	Beta-actin-like protein 2 (Kappa-actin)	1	10	2	31.1	42.004	529040000	425560000	399820000	885290000	905350000	916780000	1.99895	0.000371736
sp|Q3UEB3|PUF60_MOUSE;tr|Q0VDY2|Q0VDY2_MOUSE	sp|Q3UEB3|PUF60_MOUSE	sp|Q3UEB3|PUF60_MOUSE Poly(U)-binding-splicing factor PUF60 OS=Mus musculus OX=10090 GN=Puf60 PE=1 SV=2	Q3UEB3	Puf60	Poly(U)-binding-splicing factor PUF60 (60 kDa poly(U)-binding-splicing factor)	2	24	24	47.2	60.248	836910000	837910000	827440000	931340000	906700000	923910000	1.10378	0.000418628
sp|P61025|CKS1_MOUSE;tr|Q3UNC9|Q3UNC9_MOUSE;tr|V9GWZ0|V9GWZ0_MOUSE;tr|D3YXP1|D3YXP1_MOUSE;tr|Q9D108|Q9D108_MOUSE;tr|Q9D0L3|Q9D0L3_MOUSE	sp|P61025|CKS1_MOUSE;tr|Q3UNC9|Q3UNC9_MOUSE;tr|V9GWZ0|V9GWZ0_MOUSE;tr|D3YXP1|D3YXP1_MOUSE;tr|Q9D108|Q9D108_MOUSE;tr|Q9D0L3|Q9D0L3_MOUSE	sp|P61025|CKS1_MOUSE Cyclin-dependent kinases regulatory subunit 1 OS=Mus musculus OX=10090 GN=Cks1b PE=3 SV=1;tr|Q3UNC9|Q3UNC9_MOUSE Cyclin-dependent kinases regulatory subunit OS=Mus musculus OX=10090 GN=Cks1brt PE=2 SV=1;tr|V9GWZ0|V9GWZ0_MOUSE Cyclin-de	P61025	Cks1b Cks1 Sid1334	Cyclin-dependent kinases regulatory subunit 1 (CKS-1) (Sid 1334)	6	2	2	32.9	9.6601	113070000	108940000	110960000	50907000	54394000	68927000	0.523254	0.000721772
tr|Q3UZ17|Q3UZ17_MOUSE;sp|Q7TNC4|LC7L2_MOUSE;tr|Q3UGK2|Q3UGK2_MOUSE;tr|Q3U5L2|Q3U5L2_MOUSE;tr|Q05CX5|Q05CX5_MOUSE;tr|E9Q715|E9Q715_MOUSE;tr|Q3USM3|Q3USM3_MOUSE	tr|Q3UZ17|Q3UZ17_MOUSE;sp|Q7TNC4|LC7L2_MOUSE;tr|Q3UGK2|Q3UGK2_MOUSE;tr|Q3U5L2|Q3U5L2_MOUSE;tr|Q05CX5|Q05CX5_MOUSE;tr|E9Q715|E9Q715_MOUSE	tr|Q3UZ17|Q3UZ17_MOUSE Uncharacterized protein OS=Mus musculus OX=10090 GN=Luc7l2 PE=2 SV=1;sp|Q7TNC4|LC7L2_MOUSE Putative RNA-binding protein Luc7-like 2 OS=Mus musculus OX=10090 GN=Luc7l2 PE=1 SV=1;tr|Q3UGK2|Q3UGK2_MOUSE Uncharacterized protein OS=Mus mu	Q3UZ17	Luc7l2	Uncharacterized protein	7	16	10	40.3	45.404	778590000	791040000	754940000	676520000	661770000	669900000	0.863897	0.000762732
sp|Q9ERS2|NDUAD_MOUSE	sp|Q9ERS2|NDUAD_MOUSE	sp|Q9ERS2|NDUAD_MOUSE NADH dehydrogenase [ubiquinone] 1 alpha subcomplex subunit 13 OS=Mus musculus OX=10090 GN=Ndufa13 PE=1 SV=3	Q9ERS2	Ndufa13 Grim19	NADH dehydrogenase [ubiquinone] 1 alpha subcomplex subunit 13 (Cell death regulatory protein GRIM-19) (Complex I-B16.6) (CI-B16.6) (Gene associated with retinoic and interferon-induced mortality 19 protein) (GRIM-19) (Gene associated with retinoic and IFN-induced mortality 19 protein) (NADH-ubiquinone oxidoreductase B16.6 subunit)	1	6	6	49.3	16.859	363360000	371310000	344630000	256240000	235800000	219140000	0.658927	0.000773341
sp|Q922Q1|MARC2_MOUSE;tr|E0CZH6|E0CZH6_MOUSE;tr|A0A087WPC2|A0A087WPC2_MOUSE;sp|Q9CW42|MARC1_MOUSE;tr|D3YZZ3|D3YZZ3_MOUSE	sp|Q922Q1|MARC2_MOUSE	sp|Q922Q1|MARC2_MOUSE Mitochondrial amidoxime reducing component 2 OS=Mus musculus OX=10090 GN=Marc2 PE=1 SV=1	Q922Q1	Marc2 Mg87 Mosc2	Mitochondrial amidoxime reducing component 2 (mARC2) (EC 1.-.-.-) (Molybdenum cofactor sulfurase C-terminal domain-containing protein 2) (MOSC domain-containing protein 2) (Moco sulfurase C-terminal domain-containing protein 2)	5	17	17	45.9	38.194	599630000	609740000	579730000	506700000	499250000	514210000	0.849679	0.000797791
tr|Q3TU79|Q3TU79_MOUSE;sp|Q9QYJ3|DNJB1_MOUSE;tr|Q3TIT6|Q3TIT6_MOUSE;tr|Q3TYL7|Q3TYL7_MOUSE	tr|Q3TU79|Q3TU79_MOUSE;sp|Q9QYJ3|DNJB1_MOUSE;tr|Q3TIT6|Q3TIT6_MOUSE;tr|Q3TYL7|Q3TYL7_MOUSE	tr|Q3TU79|Q3TU79_MOUSE DnaJ (Hsp40) homolog, subfamily B, member 1 OS=Mus musculus OX=10090 GN=Dnajb1 PE=1 SV=1;sp|Q9QYJ3|DNJB1_MOUSE DnaJ homolog subfamily B member 1 OS=Mus musculus OX=10090 GN=Dnajb1 PE=1 SV=3;tr|Q3TIT6|Q3TIT6_MOUSE Uncharacterized prot	Q3TU79	Dnajb1 mCG_11044	DnaJ (Hsp40) homolog, subfamily B, member 1	4	11	10	37.9	38.167	63992000	60310000	60400000	75001000	78777000	76119000	1.24469	0.000799581
sp|F8VPU2|FARP1_MOUSE;tr|Q8K2R0|Q8K2R0_MOUSE;tr|E9Q805|E9Q805_MOUSE;tr|Q99KU3|Q99KU3_MOUSE;tr|Q3UY58|Q3UY58_MOUSE;tr|Q8R2X2|Q8R2X2_MOUSE;tr|Q8BM51|Q8BM51_MOUSE;tr|Q80VF7|Q80VF7_MOUSE	sp|F8VPU2|FARP1_MOUSE;tr|Q8K2R0|Q8K2R0_MOUSE	sp|F8VPU2|FARP1_MOUSE FERM, ARHGEF and pleckstrin domain-containing protein 1 OS=Mus musculus OX=10090 GN=Farp1 PE=1 SV=1;tr|Q8K2R0|Q8K2R0_MOUSE Farp1 protein (Fragment) OS=Mus musculus OX=10090 GN=Farp1 PE=2 SV=1	F8VPU2	Farp1	FERM, ARHGEF and pleckstrin domain-containing protein 1 (FERM, RhoGEF and pleckstrin domain-containing protein 1)	8	20	20	29.4	118.87	244520000	248220000	249900000	264590000	262880000	266960000	1.06974	0.000955131
tr|E0CYH0|E0CYH0_MOUSE;sp|Q9ER69|FL2D_MOUSE;tr|F7CCI4|F7CCI4_MOUSE;tr|Q571E0|Q571E0_MOUSE;tr|A0A3B2W4D2|A0A3B2W4D2_MOUSE;tr|E0CZF5|E0CZF5_MOUSE	tr|E0CYH0|E0CYH0_MOUSE;sp|Q9ER69|FL2D_MOUSE;tr|F7CCI4|F7CCI4_MOUSE	tr|E0CYH0|E0CYH0_MOUSE MCG16685, isoform CRA_d OS=Mus musculus OX=10090 GN=Wtap PE=1 SV=1;sp|Q9ER69|FL2D_MOUSE Pre-mRNA-splicing regulator WTAP OS=Mus musculus OX=10090 GN=Wtap PE=1 SV=3;tr|F7CCI4|F7CCI4_MOUSE Pre-mRNA-splicing regulator WTAP (Fragment) OS	E0CYH0	Wtap mCG_16685	MCG16685, isoform CRA_d (Pre-mRNA-splicing regulator WTAP)	6	9	9	31.6	44.203	101010000	102880000	105800000	120180000	124960000	119880000	1.17866	0.00102623
sp|Q99MR6|SRRT_MOUSE;tr|A0A0G2JDF8|A0A0G2JDF8_MOUSE;tr|A0A0G2JDN3|A0A0G2JDN3_MOUSE;tr|A0A0G2JG65|A0A0G2JG65_MOUSE;tr|A0A0G2JDF1|A0A0G2JDF1_MOUSE;tr|A0A1Y7VNN4|A0A1Y7VNN4_MOUSE	sp|Q99MR6|SRRT_MOUSE;tr|A0A0G2JDF8|A0A0G2JDF8_MOUSE	sp|Q99MR6|SRRT_MOUSE Serrate RNA effector molecule homolog OS=Mus musculus OX=10090 GN=Srrt PE=1 SV=1;tr|A0A0G2JDF8|A0A0G2JDF8_MOUSE Serrate RNA effector molecule homolog (Fragment) OS=Mus musculus OX=10090 GN=Srrt PE=1 SV=1	Q99MR6	Srrt Ars2 Asr2	Serrate RNA effector molecule homolog (Arsenite-resistance protein 2)	6	35	35	43.1	100.45	1032200000	1034200000	1071000000	1172000000	1198200000	1167700000	1.12765	0.0010773
sp|Q8C570|RAE1L_MOUSE;tr|Q8CBU3|Q8CBU3_MOUSE;tr|A2ASC6|A2ASC6_MOUSE;tr|Q6PAS9|Q6PAS9_MOUSE	sp|Q8C570|RAE1L_MOUSE;tr|Q8CBU3|Q8CBU3_MOUSE	sp|Q8C570|RAE1L_MOUSE mRNA export factor OS=Mus musculus OX=10090 GN=Rae1 PE=1 SV=1;tr|Q8CBU3|Q8CBU3_MOUSE Uncharacterized protein OS=Mus musculus OX=10090 PE=2 SV=1	Q8C570	Rae1 Mrnp41	mRNA export factor (Rae1 protein homolog) (mRNA-associated protein mrnp 41)	4	17	17	82.1	40.965	535630000	542550000	537230000	512830000	503020000	509750000	0.944404	0.0011097
tr|A4FUV7|A4FUV7_MOUSE;tr|A4FUV6|A4FUV6_MOUSE;tr|F8VQL0|F8VQL0_MOUSE;sp|P16056|MET_MOUSE;tr|A2VCS0|A2VCS0_MOUSE;tr|F6X333|F6X333_MOUSE;tr|Q3TCS4|Q3TCS4_MOUSE	tr|A4FUV7|A4FUV7_MOUSE;tr|A4FUV6|A4FUV6_MOUSE;tr|F8VQL0|F8VQL0_MOUSE;sp|P16056|MET_MOUSE	tr|A4FUV7|A4FUV7_MOUSE Met protein (Fragment) OS=Mus musculus OX=10090 GN=Met PE=2 SV=1;tr|A4FUV6|A4FUV6_MOUSE Met protein (Fragment) OS=Mus musculus OX=10090 GN=Met PE=2 SV=1;tr|F8VQL0|F8VQL0_MOUSE Hepatocyte growth factor receptor OS=Mus musculus OX=1009	A4FUV7	Met	Met protein (Fragment)	7	5	4	3.8	153.3	12062000	12267000	NaN	NaN	16086000	16262000	1.32961	0.00113331
sp|P59708|SF3B6_MOUSE;tr|A0A1W2P7L7|A0A1W2P7L7_MOUSE	sp|P59708|SF3B6_MOUSE;tr|A0A1W2P7L7|A0A1W2P7L7_MOUSE	sp|P59708|SF3B6_MOUSE Splicing factor 3B subunit 6 OS=Mus musculus OX=10090 GN=Sf3b6 PE=1 SV=1;tr|A0A1W2P7L7|A0A1W2P7L7_MOUSE Splicing factor 3B subunit 6 (Fragment) OS=Mus musculus OX=10090 GN=Sf3b6 PE=1 SV=1	P59708	Sf3b6 Sf3b14	Splicing factor 3B subunit 6 (Pre-mRNA branch site protein p14) (SF3b 14 kDa subunit)	2	5	5	40	14.585	372710000	352260000	364950000	414900000	427950000	422000000	1.1605	0.00116845
sp|O70152|DPM1_MOUSE;tr|A2BDX2|A2BDX2_MOUSE;tr|F8WII3|F8WII3_MOUSE	sp|O70152|DPM1_MOUSE;tr|A2BDX2|A2BDX2_MOUSE	sp|O70152|DPM1_MOUSE Dolichol-phosphate mannosyltransferase subunit 1 OS=Mus musculus OX=10090 GN=Dpm1 PE=1 SV=1;tr|A2BDX2|A2BDX2_MOUSE Dolichol-phosphate mannosyltransferase subunit 1 OS=Mus musculus OX=10090 GN=Dpm1 PE=1 SV=1	O70152	Dpm1	Dolichol-phosphate mannosyltransferase subunit 1 (EC 2.4.1.83) (Dolichol-phosphate mannose synthase subunit 1) (DPM synthase subunit 1) (Dolichyl-phosphate beta-D-mannosyltransferase subunit 1) (Mannose-P-dolichol synthase subunit 1) (MPD synthase)	3	7	7	33.5	29.174	100700000	105030000	99452000	136170000	152920000	142130000	1.41299	0.00126121
sp|Q922V4|PLRG1_MOUSE;tr|D3Z4V1|D3Z4V1_MOUSE;tr|F8WI31|F8WI31_MOUSE	sp|Q922V4|PLRG1_MOUSE;tr|D3Z4V1|D3Z4V1_MOUSE;tr|F8WI31|F8WI31_MOUSE	sp|Q922V4|PLRG1_MOUSE Pleiotropic regulator 1 OS=Mus musculus OX=10090 GN=Plrg1 PE=1 SV=1;tr|D3Z4V1|D3Z4V1_MOUSE Pleiotropic regulator 1 OS=Mus musculus OX=10090 GN=Plrg1 PE=1 SV=1;tr|F8WI31|F8WI31_MOUSE Pleiotropic regulator 1 OS=Mus musculus OX=10090 GN=	Q922V4	Plrg1	Pleiotropic regulator 1	3	23	23	57.5	56.937	557070000	576540000	588420000	688610000	665260000	700180000	1.19281	0.00129236
sp|O88967|YMEL1_MOUSE;tr|Q8C597|Q8C597_MOUSE	sp|O88967|YMEL1_MOUSE	sp|O88967|YMEL1_MOUSE ATP-dependent zinc metalloprotease YME1L1 OS=Mus musculus OX=10090 GN=Yme1l1 PE=1 SV=1	O88967	Yme1l1	ATP-dependent zinc metalloprotease YME1L1 (EC 3.4.24.-) (ATP-dependent metalloprotease FtsH1) (YME1-like protein 1)	2	21	21	36.9	80.027	453770000	456760000	439650000	405240000	393840000	400990000	0.888822	0.00130983
tr|G5E850|G5E850_MOUSE;tr|Q544Z9|Q544Z9_MOUSE;sp|P56395|CYB5_MOUSE;tr|E0CY88|E0CY88_MOUSE	tr|G5E850|G5E850_MOUSE;tr|Q544Z9|Q544Z9_MOUSE;sp|P56395|CYB5_MOUSE;tr|E0CY88|E0CY88_MOUSE	tr|G5E850|G5E850_MOUSE Cytochrome b-5, isoform CRA_a OS=Mus musculus OX=10090 GN=Cyb5a PE=1 SV=1;tr|Q544Z9|Q544Z9_MOUSE Cytochrome b-5, isoform CRA_d OS=Mus musculus OX=10090 GN=Cyb5a PE=1 SV=1;sp|P56395|CYB5_MOUSE Cytochrome b5 OS=Mus musculus OX=10090 GN	G5E850	Cyb5a Cyb5 mCG_1553	Cytochrome b-5, isoform CRA_a (Cytochrome b5)	4	4	4	56.1	11.142	459920000	455350000	480650000	388790000	389490000	368670000	0.821645	0.00131406
sp|Q8VHN8|TIRR_MOUSE;tr|A0A2R8VH99|A0A2R8VH99_MOUSE;tr|A0A087WSB5|A0A087WSB5_MOUSE;tr|A0A087WRE5|A0A087WRE5_MOUSE;sp|Q6P3D0|NUD16_MOUSE;tr|E9Q9G1|E9Q9G1_MOUSE;tr|C9W8M5|C9W8M5_MOUSE	sp|Q8VHN8|TIRR_MOUSE;tr|A0A2R8VH99|A0A2R8VH99_MOUSE	sp|Q8VHN8|TIRR_MOUSE Tudor-interacting repair regulator protein OS=Mus musculus OX=10090 GN=Nudt16l1 PE=1 SV=2;tr|A0A2R8VH99|A0A2R8VH99_MOUSE Nudix (Nucleoside diphosphate linked moiety X)-type motif 16-like 1, isoform CRA_b OS=Mus musculus OX=10090 GN=Nud	Q8VHN8	Nudt16l1 Sdos Tirr	Tudor-interacting repair regulator protein (NUDT16-like protein 1) (Protein syndesmos)	7	5	5	29.9	23.414	42546000	43699000	47962000	28864000	28453000	24034000	0.606161	0.00145819
sp|P62309|RUXG_MOUSE;tr|Q3V424|Q3V424_MOUSE	sp|P62309|RUXG_MOUSE;tr|Q3V424|Q3V424_MOUSE	sp|P62309|RUXG_MOUSE Small nuclear ribonucleoprotein G OS=Mus musculus OX=10090 GN=Snrpg PE=1 SV=1;tr|Q3V424|Q3V424_MOUSE Small nuclear ribonucleoprotein G OS=Mus musculus OX=10090 PE=2 SV=1	P62309	Snrpg	Small nuclear ribonucleoprotein G (snRNP-G) (Sm protein G) (Sm-G) (SmG)	2	4	4	35.5	8.496	1737400000	1604400000	1509600000	1113600000	1070800000	1101200000	0.677248	0.00148796
tr|E9Q723|E9Q723_MOUSE;tr|A0A1L1SSC7|A0A1L1SSC7_MOUSE;tr|Q68FG8|Q68FG8_MOUSE;tr|A0A338P6N2|A0A338P6N2_MOUSE;tr|D3YVV0|D3YVV0_MOUSE;tr|Q3UMK4|Q3UMK4_MOUSE;tr|A0A1L1SSP7|A0A1L1SSP7_MOUSE;tr|Q8VD61|Q8VD61_MOUSE	tr|E9Q723|E9Q723_MOUSE;tr|A0A1L1SSC7|A0A1L1SSC7_MOUSE;tr|Q68FG8|Q68FG8_MOUSE;tr|A0A338P6N2|A0A338P6N2_MOUSE;tr|D3YVV0|D3YVV0_MOUSE;tr|Q3UMK4|Q3UMK4_MOUSE	tr|E9Q723|E9Q723_MOUSE Tetratricopeptide repeat domain 13 OS=Mus musculus OX=10090 GN=Ttc13 PE=1 SV=2;tr|A0A1L1SSC7|A0A1L1SSC7_MOUSE Tetratricopeptide repeat domain 13 OS=Mus musculus OX=10090 GN=Ttc13 PE=1 SV=1;tr|Q68FG8|Q68FG8_MOUSE Ttc13 protein OS=Mus	E9Q723	Ttc13	Tetratricopeptide repeat domain 13	8	3	3	4.7	89.28	NaN	8765200	9345300	20387000	23178000	22997000	2.45022	0.00157011
tr|F8WI22|F8WI22_MOUSE;tr|A0A087WRN1|A0A087WRN1_MOUSE	tr|F8WI22|F8WI22_MOUSE;tr|A0A087WRN1|A0A087WRN1_MOUSE	tr|F8WI22|F8WI22_MOUSE Bcl-2-associated transcription factor 1 OS=Mus musculus OX=10090 GN=Bclaf1 PE=1 SV=1;tr|A0A087WRN1|A0A087WRN1_MOUSE Bcl-2-associated transcription factor 1 (Fragment) OS=Mus musculus OX=10090 GN=Bclaf1 PE=1 SV=1	F8WI22	Bclaf1	Bcl-2-associated transcription factor 1	2	24	1	26.9	100.28	67576000	76839000	75384000	34259000	38109000	21657000	0.427777	0.00186933
sp|Q99PV0|PRP8_MOUSE;tr|B7ZC27|B7ZC27_MOUSE;tr|Q3UNG1|Q3UNG1_MOUSE;tr|Q3TI71|Q3TI71_MOUSE	sp|Q99PV0|PRP8_MOUSE	sp|Q99PV0|PRP8_MOUSE Pre-mRNA-processing-splicing factor 8 OS=Mus musculus OX=10090 GN=Prpf8 PE=1 SV=2	Q99PV0	Prpf8 Prp8	Pre-mRNA-processing-splicing factor 8 (Splicing factor Prp8)	4	101	101	52.5	273.61	3896500000	3955600000	3950800000	4083800000	4112900000	4135700000	1.04486	0.0018731
tr|A0A087WR20|A0A087WR20_MOUSE;tr|Q922Q7|Q922Q7_MOUSE;sp|P49935|CATH_MOUSE	tr|A0A087WR20|A0A087WR20_MOUSE;tr|Q922Q7|Q922Q7_MOUSE;sp|P49935|CATH_MOUSE	tr|A0A087WR20|A0A087WR20_MOUSE Pro-cathepsin H (Fragment) OS=Mus musculus OX=10090 GN=Ctsh PE=1 SV=6;tr|Q922Q7|Q922Q7_MOUSE Cathepsin H OS=Mus musculus OX=10090 GN=Ctsh PE=2 SV=1;sp|P49935|CATH_MOUSE Pro-cathepsin H OS=Mus musculus OX=10090 GN=Ctsh PE=1 SV	A0A087WR20	Ctsh	Pro-cathepsin H (Fragment)	3	3	3	17.2	32.393	57107000	58080000	60373000	50653000	49741000	48007000	0.845301	0.00187597
tr|Q9DCY1|Q9DCY1_MOUSE;sp|P24369|PPIB_MOUSE;tr|Q6ZQM2|Q6ZQM2_MOUSE	tr|Q9DCY1|Q9DCY1_MOUSE;sp|P24369|PPIB_MOUSE	tr|Q9DCY1|Q9DCY1_MOUSE Peptidyl-prolyl cis-trans isomerase OS=Mus musculus OX=10090 GN=Ppib PE=1 SV=1;sp|P24369|PPIB_MOUSE Peptidyl-prolyl cis-trans isomerase B OS=Mus musculus OX=10090 GN=Ppib PE=1 SV=2	Q9DCY1	Ppib CyP-20b mCG_7681	Peptidyl-prolyl cis-trans isomerase (PPIase) (EC 5.2.1.8)	3	15	15	57.9	23.713	2233500000	2231300000	2211300000	2339900000	2303500000	2312800000	1.04196	0.00199263
sp|P84084|ARF5_MOUSE	sp|P84084|ARF5_MOUSE	sp|P84084|ARF5_MOUSE ADP-ribosylation factor 5 OS=Mus musculus OX=10090 GN=Arf5 PE=1 SV=2	P84084	Arf5	ADP-ribosylation factor 5	1	10	4	64.4	20.529	90850000	83978000	92041000	112450000	107560000	113310000	1.249	0.00199415
tr|Q4VAG4|Q4VAG4_MOUSE;sp|P67984|RL22_MOUSE	tr|Q4VAG4|Q4VAG4_MOUSE;sp|P67984|RL22_MOUSE	tr|Q4VAG4|Q4VAG4_MOUSE MCG12304 OS=Mus musculus OX=10090 GN=Rpl22 PE=1 SV=1;sp|P67984|RL22_MOUSE 60S ribosomal protein L22 OS=Mus musculus OX=10090 GN=Rpl22 PE=1 SV=2	Q4VAG4	Rpl22 mCG_12304 mCG_130059	MCG12304 (MCG130059) (Ribosomal protein L22)	2	4	4	50.8	14.759	932110000	860870000	881680000	744010000	727070000	737480000	0.825735	0.00202009
sp|Q9D7N9|APMAP_MOUSE	sp|Q9D7N9|APMAP_MOUSE	sp|Q9D7N9|APMAP_MOUSE Adipocyte plasma membrane-associated protein OS=Mus musculus OX=10090 GN=Apmap PE=1 SV=1	Q9D7N9	Apmap	Adipocyte plasma membrane-associated protein (Protein DD16)	1	13	13	50.4	46.434	257540000	276380000	266640000	222090000	218680000	206630000	0.808684	0.00206924
sp|Q7TSZ8|NACC1_MOUSE;sp|Q9DCM7|NACC2_MOUSE	sp|Q7TSZ8|NACC1_MOUSE	sp|Q7TSZ8|NACC1_MOUSE Nucleus accumbens-associated protein 1 OS=Mus musculus OX=10090 GN=Nacc1 PE=1 SV=1	Q7TSZ8	Nacc1 Btbd14b Nac1	Nucleus accumbens-associated protein 1 (NAC-1) (BTB/POZ domain-containing protein 14B)	2	7	7	21.4	56.536	50808000	50364000	47887000	37789000	30760000	33503000	0.684642	0.00219101
sp|Q9D1M4|MCA3_MOUSE;tr|B0LAB0|B0LAB0_MOUSE	sp|Q9D1M4|MCA3_MOUSE	sp|Q9D1M4|MCA3_MOUSE Eukaryotic translation elongation factor 1 epsilon-1 OS=Mus musculus OX=10090 GN=Eef1e1 PE=1 SV=1	Q9D1M4	Eef1e1	Eukaryotic translation elongation factor 1 epsilon-1 (Elongation factor p18) (Multisynthase complex auxiliary component p18)	2	5	5	27	19.859	49734000	49468000	46788000	33396000	36842000	38675000	0.746031	0.0024107
sp|Q9JHS3|LTOR2_MOUSE;tr|D3YTS4|D3YTS4_MOUSE	sp|Q9JHS3|LTOR2_MOUSE;tr|D3YTS4|D3YTS4_MOUSE	sp|Q9JHS3|LTOR2_MOUSE Ragulator complex protein LAMTOR2 OS=Mus musculus OX=10090 GN=Lamtor2 PE=1 SV=1;tr|D3YTS4|D3YTS4_MOUSE Ragulator complex protein LAMTOR2 OS=Mus musculus OX=10090 GN=Lamtor2 PE=1 SV=1	Q9JHS3	Lamtor2 Mapbpip Robld3	Ragulator complex protein LAMTOR2 (Endosomal adaptor protein p14) (Late endosomal/lysosomal Mp1-interacting protein) (Late endosomal/lysosomal adaptor and MAPK and MTOR activator 2) (Mitogen-activated protein-binding protein-interacting protein) (Roadblock domain-containing protein 3)	2	2	2	15.2	13.48	31940000	32764000	33301000	NaN	27536000	26717000	0.830361	0.00262249
sp|Q61656|DDX5_MOUSE;tr|Q8BTS0|Q8BTS0_MOUSE;tr|A1L333|A1L333_MOUSE;tr|Q5U222|Q5U222_MOUSE;tr|Q3V0Z8|Q3V0Z8_MOUSE;tr|Q3UXW3|Q3UXW3_MOUSE;tr|S4R1I6|S4R1I6_MOUSE;tr|Q9CSD9|Q9CSD9_MOUSE;tr|B1ARB9|B1ARB9_MOUSE;tr|B1ARC0|B1ARC0_MOUSE;tr|O35662|O35662_MOUSE;tr|S4R1E3|S4R1E3_MOUSE;tr|Q921Y3|Q921Y3_MOUSE	sp|Q61656|DDX5_MOUSE;tr|Q8BTS0|Q8BTS0_MOUSE;tr|A1L333|A1L333_MOUSE;tr|Q5U222|Q5U222_MOUSE;tr|Q3V0Z8|Q3V0Z8_MOUSE;tr|Q3UXW3|Q3UXW3_MOUSE;tr|S4R1I6|S4R1I6_MOUSE	sp|Q61656|DDX5_MOUSE Probable ATP-dependent RNA helicase DDX5 OS=Mus musculus OX=10090 GN=Ddx5 PE=1 SV=2;tr|Q8BTS0|Q8BTS0_MOUSE DEAD (Asp-Glu-Ala-Asp) box polypeptide 5 OS=Mus musculus OX=10090 GN=Ddx5 PE=1 SV=1;tr|A1L333|A1L333_MOUSE DEAD (Asp-Glu-Ala-Asp	Q61656	Ddx5 Tnz2	Probable ATP-dependent RNA helicase DDX5 (EC 3.6.4.13) (DEAD box RNA helicase DEAD1) (mDEAD1) (DEAD box protein 5) (RNA helicase p68)	13	44	35	69.2	69.289	8316800000	8669200000	8284200000	7406300000	7382200000	7617500000	0.886657	0.00269527
tr|G3UXW9|G3UXW9_MOUSE;sp|Q99LD4|CSN1_MOUSE;tr|Q3MIA8|Q3MIA8_MOUSE;tr|A0A140LJB7|A0A140LJB7_MOUSE;tr|B1ATU4|B1ATU4_MOUSE	tr|G3UXW9|G3UXW9_MOUSE;sp|Q99LD4|CSN1_MOUSE;tr|Q3MIA8|Q3MIA8_MOUSE;tr|A0A140LJB7|A0A140LJB7_MOUSE;tr|B1ATU4|B1ATU4_MOUSE	tr|G3UXW9|G3UXW9_MOUSE COP9 signalosome complex subunit 1 OS=Mus musculus OX=10090 GN=Gps1 PE=1 SV=1;sp|Q99LD4|CSN1_MOUSE COP9 signalosome complex subunit 1 OS=Mus musculus OX=10090 GN=Gps1 PE=1 SV=1;tr|Q3MIA8|Q3MIA8_MOUSE COP9 signalosome complex subunit	G3UXW9	Gps1 mCG_2137	COP9 signalosome complex subunit 1 (MCG2137, isoform CRA_b)	5	7	7	17.3	58.86	36303000	39005000	39073000	50815000	53608000	58998000	1.42874	0.00312711
tr|Q3UG16|Q3UG16_MOUSE;sp|P35585|AP1M1_MOUSE;tr|A0A1D5RLW6|A0A1D5RLW6_MOUSE;tr|D3YZ71|D3YZ71_MOUSE;tr|S4R1Q4|S4R1Q4_MOUSE;tr|A0A0R4IZX6|A0A0R4IZX6_MOUSE;sp|Q9WVP1|AP1M2_MOUSE;tr|A0A0R4J1L4|A0A0R4J1L4_MOUSE;tr|Q8C9K8|Q8C9K8_MOUSE;tr|A0A1D5RLL9|A0A1D5RLL9_MOUSE;tr|A0A1D5RMJ1|A0A1D5RMJ1_MOUSE;tr|A0A1L1SUA0|A0A1L1SUA0_MOUSE	tr|Q3UG16|Q3UG16_MOUSE;sp|P35585|AP1M1_MOUSE	tr|Q3UG16|Q3UG16_MOUSE Adaptor-related protein complex AP-1, mu subunit 1 OS=Mus musculus OX=10090 GN=Ap1m1 PE=1 SV=1;sp|P35585|AP1M1_MOUSE AP-1 complex subunit mu-1 OS=Mus musculus OX=10090 GN=Ap1m1 PE=1 SV=3	Q3UG16	Ap1m1 mCG_118299	Adaptor-related protein complex AP-1, mu subunit 1	12	14	14	45.6	48.542	102380000	100250000	92760000	121640000	134860000	130150000	1.30895	0.00328576
sp|Q3UMR5|MCU_MOUSE	sp|Q3UMR5|MCU_MOUSE	sp|Q3UMR5|MCU_MOUSE Calcium uniporter protein, mitochondrial OS=Mus musculus OX=10090 GN=Mcu PE=1 SV=2	Q3UMR5	Mcu	Calcium uniporter protein, mitochondrial	1	11	11	33.4	39.681	151470000	149670000	150690000	107530000	114910000	126480000	0.772237	0.00345684
tr|B2RQS1|B2RQS1_MOUSE;sp|Q9ERG2|STRN3_MOUSE;tr|Q3UTR6|Q3UTR6_MOUSE;tr|B3STQ3|B3STQ3_MOUSE;tr|B3STQ2|B3STQ2_MOUSE;tr|B3STQ4|B3STQ4_MOUSE;tr|Q3TNV4|Q3TNV4_MOUSE;tr|B3STQ1|B3STQ1_MOUSE	tr|B2RQS1|B2RQS1_MOUSE;sp|Q9ERG2|STRN3_MOUSE	tr|B2RQS1|B2RQS1_MOUSE Striatin-3 OS=Mus musculus OX=10090 GN=Strn3 PE=1 SV=1;sp|Q9ERG2|STRN3_MOUSE Striatin-3 OS=Mus musculus OX=10090 GN=Strn3 PE=1 SV=1	B2RQS1	Strn3	Striatin-3 (Strn3 protein)	8	8	7	19.9	77.731	58297000	59018000	55356000	47706000	45459000	49570000	0.82663	0.0036311
sp|Q8R3Q6|CCD58_MOUSE;tr|F8WJI3|F8WJI3_MOUSE;tr|E9Q4B5|E9Q4B5_MOUSE;tr|A0A338P707|A0A338P707_MOUSE	sp|Q8R3Q6|CCD58_MOUSE;tr|F8WJI3|F8WJI3_MOUSE;tr|E9Q4B5|E9Q4B5_MOUSE	sp|Q8R3Q6|CCD58_MOUSE Coiled-coil domain-containing protein 58 OS=Mus musculus OX=10090 GN=Ccdc58 PE=1 SV=1;tr|F8WJI3|F8WJI3_MOUSE Coiled-coil domain-containing protein 58 OS=Mus musculus OX=10090 GN=Ccdc58 PE=1 SV=1;tr|E9Q4B5|E9Q4B5_MOUSE Coiled-coil doma	Q8R3Q6	Ccdc58	Coiled-coil domain-containing protein 58	4	9	9	66.7	16.665	287260000	307090000	271280000	364480000	368220000	348610000	1.24916	0.00387433
sp|Q9DCS9|NDUBA_MOUSE;tr|D3YUK4|D3YUK4_MOUSE	sp|Q9DCS9|NDUBA_MOUSE;tr|D3YUK4|D3YUK4_MOUSE	sp|Q9DCS9|NDUBA_MOUSE NADH dehydrogenase [ubiquinone] 1 beta subcomplex subunit 10 OS=Mus musculus OX=10090 GN=Ndufb10 PE=1 SV=3;tr|D3YUK4|D3YUK4_MOUSE NADH dehydrogenase [ubiquinone] 1 beta subcomplex subunit 10 (Fragment) OS=Mus musculus OX=10090 GN=Nduf	Q9DCS9	Ndufb10	NADH dehydrogenase [ubiquinone] 1 beta subcomplex subunit 10 (Complex I-PDSW) (CI-PDSW) (NADH-ubiquinone oxidoreductase PDSW subunit)	2	10	10	64.2	21.024	222380000	232090000	209780000	182280000	182850000	182860000	0.824976	0.00388757
tr|E9Q1L5|E9Q1L5_MOUSE;sp|Q8BUH8|SENP7_MOUSE;tr|Q9CRF0|Q9CRF0_MOUSE;tr|Q9CX65|Q9CX65_MOUSE;tr|Q9CQN9|Q9CQN9_MOUSE;tr|A0A0J9YUC9|A0A0J9YUC9_MOUSE;tr|Q3TPI1|Q3TPI1_MOUSE	tr|E9Q1L5|E9Q1L5_MOUSE;sp|Q8BUH8|SENP7_MOUSE;tr|Q9CRF0|Q9CRF0_MOUSE;tr|Q9CX65|Q9CX65_MOUSE;tr|Q9CQN9|Q9CQN9_MOUSE;tr|A0A0J9YUC9|A0A0J9YUC9_MOUSE;tr|Q3TPI1|Q3TPI1_MOUSE	tr|E9Q1L5|E9Q1L5_MOUSE Sentrin-specific protease 7 OS=Mus musculus OX=10090 GN=Senp7 PE=1 SV=1;sp|Q8BUH8|SENP7_MOUSE Sentrin-specific protease 7 OS=Mus musculus OX=10090 GN=Senp7 PE=1 SV=1;tr|Q9CRF0|Q9CRF0_MOUSE Sentrin-specific protease 7 (Fragment) OS=Mu	E9Q1L5	Senp7	Sentrin-specific protease 7	7	4	4	7.3	113.36	32330000	29229000	32100000	42030000	45727000	40204000	1.36624	0.00388789
sp|Q7TQH0|ATX2L_MOUSE;tr|A0A0U1RPL0|A0A0U1RPL0_MOUSE;tr|E9Q5Q0|E9Q5Q0_MOUSE;tr|Q3TYH7|Q3TYH7_MOUSE;tr|Q3TGG2|Q3TGG2_MOUSE;tr|J3QP59|J3QP59_MOUSE	sp|Q7TQH0|ATX2L_MOUSE;tr|A0A0U1RPL0|A0A0U1RPL0_MOUSE;tr|E9Q5Q0|E9Q5Q0_MOUSE;tr|Q3TYH7|Q3TYH7_MOUSE;tr|Q3TGG2|Q3TGG2_MOUSE	sp|Q7TQH0|ATX2L_MOUSE Ataxin-2-like protein OS=Mus musculus OX=10090 GN=Atxn2l PE=1 SV=1;tr|A0A0U1RPL0|A0A0U1RPL0_MOUSE Ataxin-2-like protein OS=Mus musculus OX=10090 GN=Atxn2l PE=1 SV=1;tr|E9Q5Q0|E9Q5Q0_MOUSE Ataxin-2-like protein (Fragment) OS=Mus muscul	Q7TQH0	Atxn2l A2lp	Ataxin-2-like protein	6	13	12	16.6	110.65	141560000	136000000	143190000	161390000	164030000	173830000	1.18657	0.00389673
tr|Q4KL76|Q4KL76_MOUSE;sp|Q64433|CH10_MOUSE;tr|Q9JI95|Q9JI95_MOUSE	tr|Q4KL76|Q4KL76_MOUSE;sp|Q64433|CH10_MOUSE;tr|Q9JI95|Q9JI95_MOUSE	tr|Q4KL76|Q4KL76_MOUSE Heat shock protein 1 (Chaperonin 10) OS=Mus musculus OX=10090 GN=Hspe1 PE=1 SV=1;sp|Q64433|CH10_MOUSE 10 kDa heat shock protein, mitochondrial OS=Mus musculus OX=10090 GN=Hspe1 PE=1 SV=2;tr|Q9JI95|Q9JI95_MOUSE CPN10-like protein OS=M	Q4KL76	Hspe1 mCG_117539	Heat shock protein 1 (Chaperonin 10) (MCG117539)	3	9	9	75.5	10.963	6558900000	6187300000	6370400000	7048100000	7160800000	7005800000	1.10975	0.00391469
tr|Q3TKM9|Q3TKM9_MOUSE;sp|Q9CPW4|ARPC5_MOUSE;tr|Q3UC32|Q3UC32_MOUSE;tr|Q3UA72|Q3UA72_MOUSE;tr|Q3TK56|Q3TK56_MOUSE	tr|Q3TKM9|Q3TKM9_MOUSE;sp|Q9CPW4|ARPC5_MOUSE;tr|Q3UC32|Q3UC32_MOUSE;tr|Q3UA72|Q3UA72_MOUSE;tr|Q3TK56|Q3TK56_MOUSE	tr|Q3TKM9|Q3TKM9_MOUSE Actin-related protein 2/3 complex subunit 5 OS=Mus musculus OX=10090 GN=Arpc5 PE=2 SV=1;sp|Q9CPW4|ARPC5_MOUSE Actin-related protein 2/3 complex subunit 5 OS=Mus musculus OX=10090 GN=Arpc5 PE=1 SV=3;tr|Q3UC32|Q3UC32_MOUSE Actin-relate	Q3TKM9	Arpc5	Actin-related protein 2/3 complex subunit 5	5	7	7	61.6	16.228	208090000	208760000	209200000	215260000	220540000	218310000	1.04482	0.00392917
sp|O35368|IFI3_MOUSE;tr|E9PUG6|E9PUG6_MOUSE;tr|A0A0R4J0H6|A0A0R4J0H6_MOUSE;tr|D0QMC7|D0QMC7_MOUSE	sp|O35368|IFI3_MOUSE;tr|E9PUG6|E9PUG6_MOUSE;tr|A0A0R4J0H6|A0A0R4J0H6_MOUSE;tr|D0QMC7|D0QMC7_MOUSE	sp|O35368|IFI3_MOUSE Interferon-activable protein 203 OS=Mus musculus OX=10090 GN=Ifi203 PE=1 SV=1;tr|E9PUG6|E9PUG6_MOUSE Interferon-activable protein 203 OS=Mus musculus OX=10090 GN=Ifi203 PE=1 SV=1;tr|A0A0R4J0H6|A0A0R4J0H6_MOUSE Interferon-activable prot	O35368	Ifi203	Interferon-activable protein 203 (Ifi-203) (Interferon-inducible protein p203)	4	8	0	23.3	46.299	83733000	79115000	75779000	108030000	99074000	99022000	1.28286	0.00399451
tr|Q5XK33|Q5XK33_MOUSE;sp|Q9CZB0|C560_MOUSE;tr|F8WGB3|F8WGB3_MOUSE;tr|D3Z1A8|D3Z1A8_MOUSE	tr|Q5XK33|Q5XK33_MOUSE;sp|Q9CZB0|C560_MOUSE;tr|F8WGB3|F8WGB3_MOUSE	tr|Q5XK33|Q5XK33_MOUSE Succinate dehydrogenase complex, subunit C, integral membrane protein OS=Mus musculus OX=10090 GN=Sdhc PE=2 SV=1;sp|Q9CZB0|C560_MOUSE Succinate dehydrogenase cytochrome b560 subunit, mitochondrial OS=Mus musculus OX=10090 GN=Sdhc PE=	Q5XK33	Sdhc	Succinate dehydrogenase complex, subunit C, integral membrane protein	4	4	4	29	18.381	175050000	159350000	168280000	198550000	202330000	193760000	1.18294	0.00408039
tr|Q3TTV6|Q3TTV6_MOUSE;sp|Q9ERA6|TFP11_MOUSE;tr|Q3UGE9|Q3UGE9_MOUSE;tr|D3YWC8|D3YWC8_MOUSE;tr|A0A0G2JEN8|A0A0G2JEN8_MOUSE;tr|Q3TPF9|Q3TPF9_MOUSE	tr|Q3TTV6|Q3TTV6_MOUSE;sp|Q9ERA6|TFP11_MOUSE;tr|Q3UGE9|Q3UGE9_MOUSE	tr|Q3TTV6|Q3TTV6_MOUSE Tuftelin-interacting protein 11 OS=Mus musculus OX=10090 GN=Tfip11 PE=1 SV=1;sp|Q9ERA6|TFP11_MOUSE Tuftelin-interacting protein 11 OS=Mus musculus OX=10090 GN=Tfip11 PE=1 SV=1;tr|Q3UGE9|Q3UGE9_MOUSE Tuftelin-interacting protein 11 OS	Q3TTV6	Tfip11 mCG_3481	Tuftelin-interacting protein 11	6	14	14	21.6	96.304	82651000	82294000	84278000	139290000	126970000	113840000	1.52514	0.0040865
tr|Q505A8|Q505A8_MOUSE;sp|P62892|RL39_MOUSE	tr|Q505A8|Q505A8_MOUSE;sp|P62892|RL39_MOUSE	tr|Q505A8|Q505A8_MOUSE MCG17585 OS=Mus musculus OX=10090 GN=Rpl39 PE=2 SV=1;sp|P62892|RL39_MOUSE 60S ribosomal protein L39 OS=Mus musculus OX=10090 GN=Rpl39 PE=1 SV=2	Q505A8	Rpl39 mCG_17585	MCG17585 (Ribosomal protein L39)	2	1	1	19.6	6.4066	128290000	86085000	58960000	223970000	248910000	210260000	2.49928	0.00411208
sp|Q9D1Q4|DPM3_MOUSE	sp|Q9D1Q4|DPM3_MOUSE	sp|Q9D1Q4|DPM3_MOUSE Dolichol-phosphate mannosyltransferase subunit 3 OS=Mus musculus OX=10090 GN=Dpm3 PE=1 SV=1	Q9D1Q4	Dpm3	Dolichol-phosphate mannosyltransferase subunit 3 (Dolichol-phosphate mannose synthase subunit 3) (DPM synthase subunit 3) (Dolichyl-phosphate beta-D-mannosyltransferase subunit 3) (Mannose-P-dolichol synthase subunit 3) (MPD synthase subunit 3)	1	1	1	13	10.139	50857000	49019000	42793000	62260000	64169000	67713000	1.36079	0.00417279
tr|Q99JW7|Q99JW7_MOUSE;sp|P11440|CDK1_MOUSE;tr|Q8R4A4|Q8R4A4_MOUSE;tr|D3Z2T9|D3Z2T9_MOUSE;sp|Q80YP0|CDK3_MOUSE	tr|Q99JW7|Q99JW7_MOUSE;sp|P11440|CDK1_MOUSE;tr|Q8R4A4|Q8R4A4_MOUSE;tr|D3Z2T9|D3Z2T9_MOUSE	tr|Q99JW7|Q99JW7_MOUSE Cdc2a protein (Fragment) OS=Mus musculus OX=10090 GN=Cdk1 PE=2 SV=1;sp|P11440|CDK1_MOUSE Cyclin-dependent kinase 1 OS=Mus musculus OX=10090 GN=Cdk1 PE=1 SV=3;tr|Q8R4A4|Q8R4A4_MOUSE Cell cycle p34 CDC2 kinase protein (Fragment) OS=Mus	Q99JW7	Cdk1 Cdc2a	Cdc2a protein (Fragment)	5	17	15	61.4	33.832	482370000	507150000	493750000	553430000	575390000	593370000	1.16108	0.00423098
sp|P51863|VA0D1_MOUSE;tr|Q921S5|Q921S5_MOUSE	sp|P51863|VA0D1_MOUSE;tr|Q921S5|Q921S5_MOUSE	sp|P51863|VA0D1_MOUSE V-type proton ATPase subunit d 1 OS=Mus musculus OX=10090 GN=Atp6v0d1 PE=1 SV=2;tr|Q921S5|Q921S5_MOUSE V-type proton ATPase subunit OS=Mus musculus OX=10090 GN=Atp6v0d1 PE=2 SV=1	P51863	Atp6v0d1 Atp6d	V-type proton ATPase subunit d 1 (V-ATPase subunit d 1) (P39) (Physophilin) (V-ATPase 40 kDa accessory protein) (V-ATPase AC39 subunit) (Vacuolar proton pump subunit d 1)	2	9	9	33.6	40.301	183770000	204650000	201340000	141600000	144220000	158290000	0.753035	0.00425456
tr|G3UZF0|G3UZF0_MOUSE;sp|Q91W36|UBP3_MOUSE;tr|E9Q8W9|E9Q8W9_MOUSE;tr|Q3TT00|Q3TT00_MOUSE;tr|D6RG67|D6RG67_MOUSE	tr|G3UZF0|G3UZF0_MOUSE;sp|Q91W36|UBP3_MOUSE;tr|E9Q8W9|E9Q8W9_MOUSE;tr|Q3TT00|Q3TT00_MOUSE	tr|G3UZF0|G3UZF0_MOUSE Ubiquitin carboxyl-terminal hydrolase 3 OS=Mus musculus OX=10090 GN=Usp3 PE=1 SV=1;sp|Q91W36|UBP3_MOUSE Ubiquitin carboxyl-terminal hydrolase 3 OS=Mus musculus OX=10090 GN=Usp3 PE=2 SV=1;tr|E9Q8W9|E9Q8W9_MOUSE Ubiquitinyl hydrolase 1	G3UZF0	Usp3	Ubiquitin carboxyl-terminal hydrolase (EC 3.4.19.12)	5	7	7	18.7	53.674	48724000	51022000	50256000	62876000	57329000	59772000	1.19983	0.00457118
tr|B1AR50|B1AR50_MOUSE;sp|Q9DCD6|GBRAP_MOUSE;tr|A0A1S6GWH0|A0A1S6GWH0_MOUSE	tr|B1AR50|B1AR50_MOUSE;sp|Q9DCD6|GBRAP_MOUSE;tr|A0A1S6GWH0|A0A1S6GWH0_MOUSE	tr|B1AR50|B1AR50_MOUSE Gamma-aminobutyric acid receptor-associated protein OS=Mus musculus OX=10090 GN=Gabarap PE=1 SV=1;sp|Q9DCD6|GBRAP_MOUSE Gamma-aminobutyric acid receptor-associated protein OS=Mus musculus OX=10090 GN=Gabarap PE=1 SV=2;tr|A0A1S6GWH0|A	B1AR50	Gabarap	Gamma-aminobutyric acid receptor-associated protein	3	1	1	10.4	12.195	34044000	35757000	37802000	28197000	23717000	26619000	0.72984	0.00471465
sp|Q9CWU6|UQCC1_MOUSE;tr|A6PWX7|A6PWX7_MOUSE;tr|F6V305|F6V305_MOUSE;tr|A6PWX8|A6PWX8_MOUSE;tr|A6PWX9|A6PWX9_MOUSE;tr|A6PWX5|A6PWX5_MOUSE;tr|D6RJ83|D6RJ83_MOUSE	sp|Q9CWU6|UQCC1_MOUSE;tr|A6PWX7|A6PWX7_MOUSE;tr|F6V305|F6V305_MOUSE;tr|A6PWX8|A6PWX8_MOUSE;tr|A6PWX9|A6PWX9_MOUSE;tr|A6PWX5|A6PWX5_MOUSE	sp|Q9CWU6|UQCC1_MOUSE Ubiquinol-cytochrome-c reductase complex assembly factor 1 OS=Mus musculus OX=10090 GN=Uqcc1 PE=1 SV=1;tr|A6PWX7|A6PWX7_MOUSE Ubiquinol-cytochrome-c reductase complex assembly factor 1 OS=Mus musculus OX=10090 GN=Uqcc1 PE=1 SV=1;tr|F6	Q9CWU6	Uqcc1 Bfzb Uqcc	Ubiquinol-cytochrome-c reductase complex assembly factor 1 (Basic FGF-repressed Zic-binding protein) (mbFZb) (Ubiquinol-cytochrome c reductase complex chaperone CBP3 homolog)	7	4	4	16.6	34.299	64641000	59478000	59085000	45177000	49831000	43303000	0.754956	0.00477843
tr|A0A0R3P9C8|A0A0R3P9C8_MOUSE;sp|Q9DC69|NDUA9_MOUSE	tr|A0A0R3P9C8|A0A0R3P9C8_MOUSE;sp|Q9DC69|NDUA9_MOUSE	tr|A0A0R3P9C8|A0A0R3P9C8_MOUSE NADH dehydrogenase [ubiquinone] 1 alpha subcomplex subunit 9, mitochondrial OS=Mus musculus OX=10090 GN=Ndufa9 PE=1 SV=1;sp|Q9DC69|NDUA9_MOUSE NADH dehydrogenase [ubiquinone] 1 alpha subcomplex subunit 9, mitochondrial OS=Mus	A0A0R3P9C8	Ndufa9	NADH dehydrogenase [ubiquinone] 1 alpha subcomplex subunit 9, mitochondrial	2	13	13	42.1	42.121	223200000	220820000	218230000	201180000	191540000	184330000	0.871348	0.00505008
tr|Q3UCZ5|Q3UCZ5_MOUSE;tr|Q3TZW9|Q3TZW9_MOUSE;sp|P35821|PTN1_MOUSE;tr|Q3TB93|Q3TB93_MOUSE;tr|Q3T9Y9|Q3T9Y9_MOUSE	tr|Q3UCZ5|Q3UCZ5_MOUSE;tr|Q3TZW9|Q3TZW9_MOUSE;sp|P35821|PTN1_MOUSE;tr|Q3TB93|Q3TB93_MOUSE;tr|Q3T9Y9|Q3T9Y9_MOUSE	tr|Q3UCZ5|Q3UCZ5_MOUSE Tyrosine-protein phosphatase non-receptor type OS=Mus musculus OX=10090 GN=Ptpn1 PE=2 SV=1;tr|Q3TZW9|Q3TZW9_MOUSE Tyrosine-protein phosphatase non-receptor type OS=Mus musculus OX=10090 GN=Ptpn1 PE=1 SV=1;sp|P35821|PTN1_MOUSE Tyrosin	Q3UCZ5	Ptpn1	Tyrosine-protein phosphatase non-receptor type (EC 3.1.3.48)	5	16	16	54.6	49.533	373710000	334680000	346380000	414820000	415350000	423290000	1.18837	0.00508045
tr|A0A0R4J1Z3|A0A0R4J1Z3_MOUSE;sp|Q9CR67|TMM33_MOUSE;tr|Q9CWD1|Q9CWD1_MOUSE;tr|Q9CV90|Q9CV90_MOUSE;tr|Q9CZM3|Q9CZM3_MOUSE;tr|E0CXY5|E0CXY5_MOUSE;tr|A0A0J9YV78|A0A0J9YV78_MOUSE	tr|A0A0R4J1Z3|A0A0R4J1Z3_MOUSE;sp|Q9CR67|TMM33_MOUSE;tr|Q9CWD1|Q9CWD1_MOUSE	tr|A0A0R4J1Z3|A0A0R4J1Z3_MOUSE Transmembrane protein 33 OS=Mus musculus OX=10090 GN=Tmem33 PE=1 SV=1;sp|Q9CR67|TMM33_MOUSE Transmembrane protein 33 OS=Mus musculus OX=10090 GN=Tmem33 PE=1 SV=1;tr|Q9CWD1|Q9CWD1_MOUSE Uncharacterized protein OS=Mus musculus	A0A0R4J1Z3	Tmem33	Transmembrane protein 33	7	6	6	22.8	27.932	172630000	158230000	142480000	212600000	204670000	220660000	1.34772	0.00509881
tr|Q3TT85|Q3TT85_MOUSE;sp|Q9WU56|TRUA_MOUSE;tr|H7BX59|H7BX59_MOUSE;tr|D3YWU8|D3YWU8_MOUSE;tr|D3Z092|D3Z092_MOUSE	tr|Q3TT85|Q3TT85_MOUSE;sp|Q9WU56|TRUA_MOUSE;tr|H7BX59|H7BX59_MOUSE	tr|Q3TT85|Q3TT85_MOUSE tRNA pseudouridine synthase OS=Mus musculus OX=10090 GN=Pus1 PE=2 SV=1;sp|Q9WU56|TRUA_MOUSE tRNA pseudouridine synthase A OS=Mus musculus OX=10090 GN=Pus1 PE=1 SV=2;tr|H7BX59|H7BX59_MOUSE tRNA pseudouridine synthase OS=Mus musculus O	Q3TT85	Pus1	tRNA pseudouridine synthase (EC 5.4.99.-)	5	9	9	26.5	44.07	56159000	56784000	55277000	63203000	69340000	66153000	1.18117	0.00510371
sp|O54984|ASNA_MOUSE;tr|Q8VEI6|Q8VEI6_MOUSE;tr|Q8C1Q1|Q8C1Q1_MOUSE;tr|A0A1B0GRE1|A0A1B0GRE1_MOUSE	sp|O54984|ASNA_MOUSE;tr|Q8VEI6|Q8VEI6_MOUSE;tr|Q8C1Q1|Q8C1Q1_MOUSE	sp|O54984|ASNA_MOUSE ATPase Asna1 OS=Mus musculus OX=10090 GN=Asna1 PE=1 SV=2;tr|Q8VEI6|Q8VEI6_MOUSE Arsenical pump-driving ATPase OS=Mus musculus OX=10090 GN=Asna1 PE=2 SV=1;tr|Q8C1Q1|Q8C1Q1_MOUSE Arsenical pump-driving ATPase OS=Mus musculus OX=10090 GN=	O54984	Asna1 Arsa	ATPase Asna1 (EC 3.6.-.-) (Arsenical pump-driving ATPase) (Arsenite-stimulated ATPase)	4	9	9	44.3	38.822	142590000	144160000	141080000	128260000	133700000	133250000	0.923755	0.00513497
tr|G3X9T8|G3X9T8_MOUSE;sp|Q61147|CERU_MOUSE;tr|G3X8Q5|G3X8Q5_MOUSE;tr|E9PZD8|E9PZD8_MOUSE;tr|Q8BV37|Q8BV37_MOUSE;tr|Q2F3J4|Q2F3J4_MOUSE;tr|G3UXG1|G3UXG1_MOUSE;tr|G3UWP5|G3UWP5_MOUSE;tr|G3UZ53|G3UZ53_MOUSE;CON__ENSEMBL:ENSBTAP00000031900	tr|G3X9T8|G3X9T8_MOUSE;sp|Q61147|CERU_MOUSE;tr|G3X8Q5|G3X8Q5_MOUSE;tr|E9PZD8|E9PZD8_MOUSE	tr|G3X9T8|G3X9T8_MOUSE Ceruloplasmin OS=Mus musculus OX=10090 GN=Cp PE=1 SV=1;sp|Q61147|CERU_MOUSE Ceruloplasmin OS=Mus musculus OX=10090 GN=Cp PE=1 SV=2;tr|G3X8Q5|G3X8Q5_MOUSE Ceruloplasmin OS=Mus musculus OX=10090 GN=Cp PE=1 SV=1;tr|E9PZD8|E9PZD8_MOUSE C	G3X9T8	Cp mCG_19773	Ceruloplasmin (Ceruloplasmin, isoform CRA_f)	10	24	24	34.3	121.08	218720000	222450000	199700000	176110000	161950000	162070000	0.780392	0.00519136
sp|Q9CZU3|MTREX_MOUSE;tr|Q8BTX6|Q8BTX6_MOUSE;tr|Q91YT4|Q91YT4_MOUSE;tr|Q6ZQK1|Q6ZQK1_MOUSE;tr|Q8BVI7|Q8BVI7_MOUSE;tr|Q8BVK1|Q8BVK1_MOUSE	sp|Q9CZU3|MTREX_MOUSE;tr|Q8BTX6|Q8BTX6_MOUSE;tr|Q91YT4|Q91YT4_MOUSE;tr|Q6ZQK1|Q6ZQK1_MOUSE;tr|Q8BVI7|Q8BVI7_MOUSE	sp|Q9CZU3|MTREX_MOUSE Exosome RNA helicase MTR4 OS=Mus musculus OX=10090 GN=Mtrex PE=1 SV=1;tr|Q8BTX6|Q8BTX6_MOUSE Uncharacterized protein (Fragment) OS=Mus musculus OX=10090 GN=Mtrex PE=2 SV=1;tr|Q91YT4|Q91YT4_MOUSE Skiv2l2 protein (Fragment) OS=Mus muscu	Q9CZU3	Mtrex Skiv2l2	Exosome RNA helicase MTR4 (EC 3.6.4.13) (ATP-dependent helicase SKIV2L2) (Superkiller viralicidic activity 2-like 2) (TRAMP-like complex helicase)	6	30	30	37.1	117.64	500370000	498930000	515360000	585910000	560510000	553490000	1.1223	0.00521541
tr|Q8K366|Q8K366_MOUSE;tr|Q3UNK6|Q3UNK6_MOUSE;sp|P56960|EXOSX_MOUSE;tr|Q8R2R0|Q8R2R0_MOUSE;tr|Q9CYJ3|Q9CYJ3_MOUSE;tr|F6VYQ6|F6VYQ6_MOUSE;tr|Q3TRD0|Q3TRD0_MOUSE;tr|Q99KY7|Q99KY7_MOUSE;tr|Q9CVF6|Q9CVF6_MOUSE	tr|Q8K366|Q8K366_MOUSE;tr|Q3UNK6|Q3UNK6_MOUSE;sp|P56960|EXOSX_MOUSE;tr|Q8R2R0|Q8R2R0_MOUSE;tr|Q9CYJ3|Q9CYJ3_MOUSE;tr|F6VYQ6|F6VYQ6_MOUSE;tr|Q3TRD0|Q3TRD0_MOUSE;tr|Q99KY7|Q99KY7_MOUSE	tr|Q8K366|Q8K366_MOUSE Exosc10 protein OS=Mus musculus OX=10090 GN=Exosc10 PE=1 SV=1;tr|Q3UNK6|Q3UNK6_MOUSE Exosome component 10, isoform CRA_c OS=Mus musculus OX=10090 GN=Exosc10 PE=2 SV=1;sp|P56960|EXOSX_MOUSE Exosome component 10 OS=Mus musculus OX=1009	Q8K366	Exosc10 p2 p3 p4 PM PM-Scl RRP6 Scl-100	Exosc10 protein (Exosome component 10)	9	24	24	43.9	98.115	309350000	308220000	312400000	369890000	342960000	371190000	1.16567	0.00522119
sp|Q9JJF3|RIOX1_MOUSE	sp|Q9JJF3|RIOX1_MOUSE	sp|Q9JJF3|RIOX1_MOUSE Ribosomal oxygenase 1 OS=Mus musculus OX=10090 GN=Riox1 PE=1 SV=2	Q9JJF3	Riox1 Mapjd No66 MNCb-7109	Ribosomal oxygenase 1 (Bifunctional lysine-specific demethylase and histidyl-hydroxylase NO66) (EC 1.14.11.-) (EC 1.14.11.27) (Histone lysine demethylase NO66)	1	9	9	24.2	67.556	50379000	48582000	45731000	57620000	57860000	62093000	1.22725	0.00525613
tr|Q8R390|Q8R390_MOUSE;tr|Q545P6|Q545P6_MOUSE;sp|P98192|GNPAT_MOUSE;tr|Q3UBU1|Q3UBU1_MOUSE;tr|Q3TKG9|Q3TKG9_MOUSE;tr|Q05DV2|Q05DV2_MOUSE;tr|Q9CT84|Q9CT84_MOUSE	tr|Q8R390|Q8R390_MOUSE;tr|Q545P6|Q545P6_MOUSE;sp|P98192|GNPAT_MOUSE;tr|Q3UBU1|Q3UBU1_MOUSE;tr|Q3TKG9|Q3TKG9_MOUSE;tr|Q05DV2|Q05DV2_MOUSE	tr|Q8R390|Q8R390_MOUSE Dihydroxyacetone phosphate acyltransferase OS=Mus musculus OX=10090 GN=Gnpat PE=2 SV=1;tr|Q545P6|Q545P6_MOUSE Dihydroxyacetone phosphate acyltransferase OS=Mus musculus OX=10090 GN=Gnpat PE=1 SV=1;sp|P98192|GNPAT_MOUSE Dihydroxyaceto	Q8R390	Gnpat	Dihydroxyacetone phosphate acyltransferase (DAP-AT) (DHAP-AT) (EC 2.3.1.42)	7	15	15	27.7	76.883	96276000	108650000	107180000	80754000	83442000	82767000	0.791279	0.00551226
sp|Q8BH57|WDR48_MOUSE;tr|A0A1L1SS76|A0A1L1SS76_MOUSE	sp|Q8BH57|WDR48_MOUSE	sp|Q8BH57|WDR48_MOUSE WD repeat-containing protein 48 OS=Mus musculus OX=10090 GN=Wdr48 PE=1 SV=1	Q8BH57	Wdr48 Kiaa1449 Uaf1	WD repeat-containing protein 48 (USP1-associated factor 1)	2	5	5	14.3	76.006	18894000	17225000	NaN	24739000	26022000	27191000	1.4388	0.00559517
sp|Q91YE7|RBM5_MOUSE;tr|S4R273|S4R273_MOUSE;tr|S4R1V5|S4R1V5_MOUSE;tr|S4R184|S4R184_MOUSE;tr|Q3UZ84|Q3UZ84_MOUSE;tr|S4R1U7|S4R1U7_MOUSE;tr|Q05CY7|Q05CY7_MOUSE;tr|S4R1N4|S4R1N4_MOUSE;tr|A0A0A6YX44|A0A0A6YX44_MOUSE;tr|S4R2T4|S4R2T4_MOUSE	sp|Q91YE7|RBM5_MOUSE	sp|Q91YE7|RBM5_MOUSE RNA-binding protein 5 OS=Mus musculus OX=10090 GN=Rbm5 PE=1 SV=1	Q91YE7	Rbm5 Luca15	RNA-binding protein 5 (Putative tumor suppressor LUCA15) (RNA-binding motif protein 5)	10	15	13	20.7	92.31	88710000	80986000	79974000	98507000	98150000	97706000	1.17901	0.00576469
tr|Q0VGQ1|Q0VGQ1_MOUSE;sp|O70503|DHB12_MOUSE;tr|Q9CSR6|Q9CSR6_MOUSE;tr|Q8BPF1|Q8BPF1_MOUSE	tr|Q0VGQ1|Q0VGQ1_MOUSE;sp|O70503|DHB12_MOUSE	tr|Q0VGQ1|Q0VGQ1_MOUSE Hydroxysteroid (17-beta) dehydrogenase 12 OS=Mus musculus OX=10090 GN=Hsd17b12 PE=2 SV=1;sp|O70503|DHB12_MOUSE Very-long-chain 3-oxoacyl-CoA reductase OS=Mus musculus OX=10090 GN=Hsd17b12 PE=1 SV=1	Q0VGQ1	Hsd17b12 mCG_18031	Hydroxysteroid (17-beta) dehydrogenase 12 (Hydroxysteroid (17-beta) dehydrogenase 12, isoform CRA_b)	4	14	14	48.1	34.741	1630600000	1688200000	1555700000	1278100000	1404800000	1284000000	0.813807	0.00581344
sp|P45377|ALD2_MOUSE	sp|P45377|ALD2_MOUSE	sp|P45377|ALD2_MOUSE Aldose reductase-related protein 2 OS=Mus musculus OX=10090 GN=Akr1b8 PE=1 SV=2	P45377	Akr1b8 Fgfrp	Aldose reductase-related protein 2 (AR) (EC 1.1.1.21) (Aldehyde reductase) (Fibroblast growth factor-regulated protein) (Protein FR-1)	1	5	2	28.8	36.12	11167000	13303000	13840000	17629000	17801000	16845000	1.36453	0.00582905
tr|A6H663|A6H663_MOUSE;sp|Q9JLV1|BAG3_MOUSE;tr|Q3TAM9|Q3TAM9_MOUSE	tr|A6H663|A6H663_MOUSE;sp|Q9JLV1|BAG3_MOUSE;tr|Q3TAM9|Q3TAM9_MOUSE	tr|A6H663|A6H663_MOUSE BCL2-associated athanogene 3 OS=Mus musculus OX=10090 GN=Bag3 PE=2 SV=1;sp|Q9JLV1|BAG3_MOUSE BAG family molecular chaperone regulator 3 OS=Mus musculus OX=10090 GN=Bag3 PE=1 SV=2;tr|Q3TAM9|Q3TAM9_MOUSE Uncharacterized protein OS=Mus	A6H663	Bag3	BCL2-associated athanogene 3	3	7	7	21.8	61.858	29647000	31323000	33292000	46680000	39833000	44005000	1.38463	0.00583558
tr|Q4VAE6|Q4VAE6_MOUSE;sp|Q9QUI0|RHOA_MOUSE;tr|A0A0A6YXF6|A0A0A6YXF6_MOUSE;tr|Q3TN61|Q3TN61_MOUSE;tr|Q9CR99|Q9CR99_MOUSE;tr|C0IQA7|C0IQA7_MOUSE;tr|A0A0A6YWJ1|A0A0A6YWJ1_MOUSE	tr|Q4VAE6|Q4VAE6_MOUSE;sp|Q9QUI0|RHOA_MOUSE;tr|A0A0A6YXF6|A0A0A6YXF6_MOUSE;tr|Q3TN61|Q3TN61_MOUSE	tr|Q4VAE6|Q4VAE6_MOUSE Ras family member A OS=Mus musculus OX=10090 GN=Rhoa PE=1 SV=1;sp|Q9QUI0|RHOA_MOUSE Transforming protein RhoA OS=Mus musculus OX=10090 GN=Rhoa PE=1 SV=1;tr|A0A0A6YXF6|A0A0A6YXF6_MOUSE Transforming protein RhoA (Fragment) OS=Mus muscu	Q4VAE6	Rhoa mCG_13026	Ras family member A (Ras homolog gene family, member A) (Ras homolog gene family, member A, isoform CRA_a)	7	9	4	66.3	21.782	1272500000	1329800000	1338000000	1156400000	1196500000	1124700000	0.882572	0.00620612
sp|P58742|AAAS_MOUSE;tr|Q8R3F7|Q8R3F7_MOUSE;tr|Q3TEP0|Q3TEP0_MOUSE;tr|A0A2R8VI65|A0A2R8VI65_MOUSE;tr|A0A2R8VHX3|A0A2R8VHX3_MOUSE;tr|Q8BU75|Q8BU75_MOUSE;tr|A0A2R8VI45|A0A2R8VI45_MOUSE;tr|A0A2R8VI59|A0A2R8VI59_MOUSE;tr|A0A2R8VHP6|A0A2R8VHP6_MOUSE	sp|P58742|AAAS_MOUSE;tr|Q8R3F7|Q8R3F7_MOUSE;tr|Q3TEP0|Q3TEP0_MOUSE	sp|P58742|AAAS_MOUSE Aladin OS=Mus musculus OX=10090 GN=Aaas PE=1 SV=1;tr|Q8R3F7|Q8R3F7_MOUSE Achalasia, adrenocortical insufficiency, alacrimia OS=Mus musculus OX=10090 GN=Aaas PE=2 SV=1;tr|Q3TEP0|Q3TEP0_MOUSE Uncharacterized protein OS=Mus musculus OX=10	P58742	Aaas	Aladin (Adracalin)	9	15	15	41	59.43	261120000	251340000	243140000	205180000	222290000	204250000	0.836051	0.00621318
sp|P40240|CD9_MOUSE	sp|P40240|CD9_MOUSE	sp|P40240|CD9_MOUSE CD9 antigen OS=Mus musculus OX=10090 GN=Cd9 PE=1 SV=2	P40240	Cd9	CD9 antigen (CD antigen CD9)	1	4	4	26.1	25.258	406000000	370760000	384140000	335580000	320910000	328890000	0.848807	0.00623156
tr|Q3TUI3|Q3TUI3_MOUSE;sp|Q8K2F0|BRD3_MOUSE;tr|A2AKA9|A2AKA9_MOUSE;tr|Q4G5Y4|Q4G5Y4_MOUSE;tr|Q5CCJ9|Q5CCJ9_MOUSE;tr|Q05DR7|Q05DR7_MOUSE;tr|Q53TY6|Q53TY6_MOUSE;tr|S4R1Z1|S4R1Z1_MOUSE;sp|Q91Y44|BRDT_MOUSE	tr|Q3TUI3|Q3TUI3_MOUSE;sp|Q8K2F0|BRD3_MOUSE;tr|A2AKA9|A2AKA9_MOUSE;tr|Q4G5Y4|Q4G5Y4_MOUSE;tr|Q5CCJ9|Q5CCJ9_MOUSE;tr|Q05DR7|Q05DR7_MOUSE	tr|Q3TUI3|Q3TUI3_MOUSE Bromodomain containing 3, isoform CRA_d OS=Mus musculus OX=10090 GN=Brd3 PE=2 SV=1;sp|Q8K2F0|BRD3_MOUSE Bromodomain-containing protein 3 OS=Mus musculus OX=10090 GN=Brd3 PE=1 SV=2;tr|A2AKA9|A2AKA9_MOUSE Bromodomain-containing protein	Q3TUI3	Brd3 mCG_11349	Bromodomain containing 3, isoform CRA_d	9	12	6	19.8	79.761	54409000	57800000	67156000	39798000	35666000	40010000	0.643793	0.00634685
sp|Q9CZX5|PINX1_MOUSE	sp|Q9CZX5|PINX1_MOUSE	sp|Q9CZX5|PINX1_MOUSE PIN2/TERF1-interacting telomerase inhibitor 1 OS=Mus musculus OX=10090 GN=Pinx1 PE=1 SV=2	Q9CZX5	Pinx1 Lpts	PIN2/TERF1-interacting telomerase inhibitor 1 (67-11-3 protein) (LPTS1) (Liver-related putative tumor suppressor) (Pin2-interacting protein X1) (TRF1-interacting protein 1)	1	5	5	19.9	37.22	40908000	37728000	41137000	55323000	61464000	NaN	1.4626	0.00635027
sp|Q62371|DDR2_MOUSE;tr|A0A0A6YXY2|A0A0A6YXY2_MOUSE;tr|Q544T2|Q544T2_MOUSE;tr|Q05BN5|Q05BN5_MOUSE;tr|O35407|O35407_MOUSE;sp|Q03146|DDR1_MOUSE	sp|Q62371|DDR2_MOUSE	sp|Q62371|DDR2_MOUSE Discoidin domain-containing receptor 2 OS=Mus musculus OX=10090 GN=Ddr2 PE=1 SV=2	Q62371	Ddr2 Ntrkr3 Tkt Tyro10	Discoidin domain-containing receptor 2 (Discoidin domain receptor 2) (EC 2.7.10.1) (CD167 antigen-like family member B) (Neurotrophic tyrosine kinase, receptor-related 3) (Receptor protein-tyrosine kinase TKT) (Tyrosine-protein kinase TYRO10) (CD antigen CD167b)	6	10	10	17.3	96.481	33992000	38378000	36271000	29821000	29394000	29443000	0.816064	0.00638378
sp|Q9QUM9|PSA6_MOUSE;tr|E0CXB1|E0CXB1_MOUSE;tr|E0CYT2|E0CYT2_MOUSE	sp|Q9QUM9|PSA6_MOUSE;tr|E0CXB1|E0CXB1_MOUSE	sp|Q9QUM9|PSA6_MOUSE Proteasome subunit alpha type-6 OS=Mus musculus OX=10090 GN=Psma6 PE=1 SV=1;tr|E0CXB1|E0CXB1_MOUSE Proteasome endopeptidase complex OS=Mus musculus OX=10090 GN=Psma6 PE=1 SV=1	Q9QUM9	Psma6	Proteasome subunit alpha type-6 (EC 3.4.25.1) (Macropain iota chain) (Multicatalytic endopeptidase complex iota chain) (Proteasome iota chain)	3	12	12	52.8	27.372	272820000	279450000	351300000	421880000	449430000	455440000	1.46834	0.00655237
tr|Q3TU85|Q3TU85_MOUSE;sp|Q61696|HS71A_MOUSE;sp|P17879|HS71B_MOUSE;tr|Q3TAI8|Q3TAI8_MOUSE;tr|A1E2B8|A1E2B8_MOUSE;tr|Q61698|Q61698_MOUSE;tr|O88688|O88688_MOUSE	tr|Q3TU85|Q3TU85_MOUSE;sp|Q61696|HS71A_MOUSE;sp|P17879|HS71B_MOUSE;tr|Q3TAI8|Q3TAI8_MOUSE;tr|A1E2B8|A1E2B8_MOUSE	tr|Q3TU85|Q3TU85_MOUSE Heat shock protein 1B OS=Mus musculus OX=10090 GN=Hspa1b PE=1 SV=1;sp|Q61696|HS71A_MOUSE Heat shock 70 kDa protein 1A OS=Mus musculus OX=10090 GN=Hspa1a PE=1 SV=2;sp|P17879|HS71B_MOUSE Heat shock 70 kDa protein 1B OS=Mus musculus OX=	Q3TU85	Hspa1b mCG_1031930	Heat shock protein 1B (Hspa1b protein)	7	29	16	57.7	70.078	267350000	272400000	295270000	1223200000	1372100000	818350000	4.08811	0.00656887
sp|Q9CWU2|ZDH13_MOUSE;tr|D3YY07|D3YY07_MOUSE	sp|Q9CWU2|ZDH13_MOUSE	sp|Q9CWU2|ZDH13_MOUSE Palmitoyltransferase ZDHHC13 OS=Mus musculus OX=10090 GN=Zdhhc13 PE=1 SV=2	Q9CWU2	Zdhhc13 Hip14l	Palmitoyltransferase ZDHHC13 (EC 2.3.1.225) (Huntingtin-interacting protein 14-related protein) (HIP14-related protein) (Zinc finger DHHC domain-containing protein 13) (DHHC-13)	2	7	6	16.1	70.889	53016000	55942000	49401000	41823000	43199000	39262000	0.784824	0.0068559
tr|Q8C2T9|Q8C2T9_MOUSE;sp|Q9Z1M8|RED_MOUSE;tr|Q8CDT0|Q8CDT0_MOUSE;tr|Q8C7D0|Q8C7D0_MOUSE;tr|Q3TJY5|Q3TJY5_MOUSE	tr|Q8C2T9|Q8C2T9_MOUSE;sp|Q9Z1M8|RED_MOUSE;tr|Q8CDT0|Q8CDT0_MOUSE;tr|Q8C7D0|Q8C7D0_MOUSE;tr|Q3TJY5|Q3TJY5_MOUSE	tr|Q8C2T9|Q8C2T9_MOUSE Uncharacterized protein OS=Mus musculus OX=10090 GN=Ik PE=2 SV=1;sp|Q9Z1M8|RED_MOUSE Protein Red OS=Mus musculus OX=10090 GN=Ik PE=1 SV=2;tr|Q8CDT0|Q8CDT0_MOUSE Uncharacterized protein (Fragment) OS=Mus musculus OX=10090 GN=Ik PE=2 S	Q8C2T9	Ik	Uncharacterized protein	5	25	25	51.5	65.588	495280000	517090000	474860000	587660000	557920000	592770000	1.16885	0.00686054
sp|Q9Z0G0|GIPC1_MOUSE;tr|A0A1D5RML2|A0A1D5RML2_MOUSE	sp|Q9Z0G0|GIPC1_MOUSE	sp|Q9Z0G0|GIPC1_MOUSE PDZ domain-containing protein GIPC1 OS=Mus musculus OX=10090 GN=Gipc1 PE=1 SV=1	Q9Z0G0	Gipc1 Gipc Rgs19ip1 Semcap1	PDZ domain-containing protein GIPC1 (GAIP C-terminus-interacting protein) (RGS-GAIP-interacting protein) (RGS19-interacting protein 1) (SemaF cytoplasmic domain-associated protein 1) (SEMCAP-1) (Synectin)	2	5	5	26.1	36.129	30297000	29418000	27600000	22801000	21493000	24628000	0.789349	0.00708557
sp|Q6PHZ2|KCC2D_MOUSE;tr|E9Q1W0|E9Q1W0_MOUSE;tr|E9Q1T1|E9Q1T1_MOUSE;tr|A0A0G2JGS4|A0A0G2JGS4_MOUSE;tr|E9Q1V9|E9Q1V9_MOUSE;tr|Q8C8X9|Q8C8X9_MOUSE;tr|Q8CCM0|Q8CCM0_MOUSE;tr|Q3V1X9|Q3V1X9_MOUSE;tr|E9PXV3|E9PXV3_MOUSE;tr|F6RWZ9|F6RWZ9_MOUSE;tr|O70459|O70459_MOUSE;tr|E9QAJ4|E9QAJ4_MOUSE;tr|D6RDQ8|D6RDQ8_MOUSE	sp|Q6PHZ2|KCC2D_MOUSE;tr|E9Q1W0|E9Q1W0_MOUSE;tr|E9Q1T1|E9Q1T1_MOUSE;tr|A0A0G2JGS4|A0A0G2JGS4_MOUSE;tr|E9Q1V9|E9Q1V9_MOUSE;tr|Q8C8X9|Q8C8X9_MOUSE;tr|Q8CCM0|Q8CCM0_MOUSE	sp|Q6PHZ2|KCC2D_MOUSE Calcium/calmodulin-dependent protein kinase type II subunit delta OS=Mus musculus OX=10090 GN=Camk2d PE=1 SV=1;tr|E9Q1W0|E9Q1W0_MOUSE Calcium/calmodulin-dependent protein kinase type II subunit delta OS=Mus musculus OX=10090 GN=Camk2d	Q6PHZ2	Camk2d Kiaa4163	Calcium/calmodulin-dependent protein kinase type II subunit delta (CaM kinase II subunit delta) (CaMK-II subunit delta) (EC 2.7.11.17)	13	11	7	30.1	56.369	162090000	141070000	155760000	118910000	123000000	120590000	0.789898	0.00712542
sp|P62315|SMD1_MOUSE;tr|A0A3Q4L381|A0A3Q4L381_MOUSE;tr|A0A3Q4L2W0|A0A3Q4L2W0_MOUSE	sp|P62315|SMD1_MOUSE	sp|P62315|SMD1_MOUSE Small nuclear ribonucleoprotein Sm D1 OS=Mus musculus OX=10090 GN=Snrpd1 PE=1 SV=1	P62315	Snrpd1	Small nuclear ribonucleoprotein Sm D1 (Sm-D1) (Sm-D autoantigen) (snRNP core protein D1)	3	5	5	54.6	13.281	790120000	707300000	811310000	1008200000	1021400000	1160800000	1.38189	0.0072432
tr|Q9CSS1|Q9CSS1_MOUSE;tr|E9PZM7|E9PZM7_MOUSE;tr|A0A2I3BQU5|A0A2I3BQU5_MOUSE;tr|Q6ZPE9|Q6ZPE9_MOUSE;tr|A0A2I3BRQ7|A0A2I3BRQ7_MOUSE;tr|Q810T0|Q810T0_MOUSE	tr|Q9CSS1|Q9CSS1_MOUSE;tr|E9PZM7|E9PZM7_MOUSE;tr|A0A2I3BQU5|A0A2I3BQU5_MOUSE;tr|Q6ZPE9|Q6ZPE9_MOUSE;tr|A0A2I3BRQ7|A0A2I3BRQ7_MOUSE	tr|Q9CSS1|Q9CSS1_MOUSE Uncharacterized protein (Fragment) OS=Mus musculus OX=10090 GN=Scaf11 PE=2 SV=1;tr|E9PZM7|E9PZM7_MOUSE SR-related CTD-associated factor 11 OS=Mus musculus OX=10090 GN=Scaf11 PE=1 SV=1;tr|A0A2I3BQU5|A0A2I3BQU5_MOUSE SR-related CTD-ass	Q9CSS1	Scaf11 Sfrs2ip Srsf2ip	Uncharacterized protein (Fragment)	6	17	17	16.8	128.74	129160000	134790000	132590000	150800000	153000000	143350000	1.12763	0.00728825
tr|Q3U1C2|Q3U1C2_MOUSE;sp|P60122|RUVB1_MOUSE;tr|Q3UJN2|Q3UJN2_MOUSE;tr|D3YW60|D3YW60_MOUSE;tr|Q05CB6|Q05CB6_MOUSE	tr|Q3U1C2|Q3U1C2_MOUSE;sp|P60122|RUVB1_MOUSE;tr|Q3UJN2|Q3UJN2_MOUSE	tr|Q3U1C2|Q3U1C2_MOUSE RuvB-like helicase OS=Mus musculus OX=10090 GN=Ruvbl1 PE=1 SV=1;sp|P60122|RUVB1_MOUSE RuvB-like 1 OS=Mus musculus OX=10090 GN=Ruvbl1 PE=1 SV=1;tr|Q3UJN2|Q3UJN2_MOUSE RuvB-like helicase OS=Mus musculus OX=10090 GN=Ruvbl1 PE=2 SV=1	Q3U1C2	Ruvbl1 mCG_130614	RuvB-like helicase (EC 3.6.4.12)	5	25	25	63.2	50.213	963210000	976730000	994950000	1154300000	1153400000	1070300000	1.15098	0.00730314
tr|Q9R1R9|Q9R1R9_MOUSE;tr|Q9R1R8|Q9R1R8_MOUSE;sp|Q9QYF1|RDH11_MOUSE;tr|Q9R1R5|Q9R1R5_MOUSE	tr|Q9R1R9|Q9R1R9_MOUSE;tr|Q9R1R8|Q9R1R8_MOUSE;sp|Q9QYF1|RDH11_MOUSE	tr|Q9R1R9|Q9R1R9_MOUSE UBE-1a OS=Mus musculus OX=10090 GN=Rdh11 PE=2 SV=1;tr|Q9R1R8|Q9R1R8_MOUSE Retinol dehydrogenase 11 OS=Mus musculus OX=10090 GN=Rdh11 PE=1 SV=1;sp|Q9QYF1|RDH11_MOUSE Retinol dehydrogenase 11 OS=Mus musculus OX=10090 GN=Rdh11 PE=1 SV=2	Q9R1R9	Rdh11 Ube-1a	UBE-1a	4	11	11	44.7	32.442	330780000	324790000	311370000	284210000	267120000	287310000	0.867313	0.00734177
sp|Q9CXP8|GBG10_MOUSE;tr|G3UZK1|G3UZK1_MOUSE	sp|Q9CXP8|GBG10_MOUSE;tr|G3UZK1|G3UZK1_MOUSE	sp|Q9CXP8|GBG10_MOUSE Guanine nucleotide-binding protein G(I)/G(S)/G(O) subunit gamma-10 OS=Mus musculus OX=10090 GN=Gng10 PE=3 SV=1;tr|G3UZK1|G3UZK1_MOUSE Guanine nucleotide-binding protein subunit gamma OS=Mus musculus OX=10090 GN=Gm20503 PE=3 SV=1	Q9CXP8	Gng10	Guanine nucleotide-binding protein G(I)/G(S)/G(O) subunit gamma-10	2	4	4	75	7.2293	101400000	105070000	96719000	80104000	73636000	85702000	0.789745	0.00744104
sp|Q9QYE6|GOGA5_MOUSE;tr|A0A1Y7VMD3|A0A1Y7VMD3_MOUSE	sp|Q9QYE6|GOGA5_MOUSE	sp|Q9QYE6|GOGA5_MOUSE Golgin subfamily A member 5 OS=Mus musculus OX=10090 GN=Golga5 PE=1 SV=2	Q9QYE6	Golga5 Retii	Golgin subfamily A member 5 (Golgin-84) (Protein Ret-II) (Protein Sumiko)	2	19	19	35.1	82.367	142140000	141880000	137650000	178020000	159230000	175760000	1.21661	0.00753203
sp|O35972|RM23_MOUSE;tr|A0A1B0GSZ9|A0A1B0GSZ9_MOUSE;tr|A0A1B0GQZ1|A0A1B0GQZ1_MOUSE	sp|O35972|RM23_MOUSE;tr|A0A1B0GSZ9|A0A1B0GSZ9_MOUSE;tr|A0A1B0GQZ1|A0A1B0GQZ1_MOUSE	sp|O35972|RM23_MOUSE 39S ribosomal protein L23, mitochondrial OS=Mus musculus OX=10090 GN=Mrpl23 PE=1 SV=1;tr|A0A1B0GSZ9|A0A1B0GSZ9_MOUSE 39S ribosomal protein L23, mitochondrial OS=Mus musculus OX=10090 GN=Mrpl23 PE=1 SV=1;tr|A0A1B0GQZ1|A0A1B0GQZ1_MOUSE 3	O35972	Mrpl23 L23mrp	39S ribosomal protein L23, mitochondrial (L23mt) (MRP-L23) (L23 mitochondrial-related protein)	3	4	4	41.1	17.121	65904000	62508000	56635000	89938000	83726000	77708000	1.35842	0.00765664
sp|P68181|KAPCB_MOUSE;tr|H6TMF6|H6TMF6_MOUSE;tr|H6TMF5|H6TMF5_MOUSE;tr|A0A0G2JFT9|A0A0G2JFT9_MOUSE	sp|P68181|KAPCB_MOUSE	sp|P68181|KAPCB_MOUSE cAMP-dependent protein kinase catalytic subunit beta OS=Mus musculus OX=10090 GN=Prkacb PE=1 SV=2	P68181	Prkacb Pkacb	cAMP-dependent protein kinase catalytic subunit beta (PKA C-beta) (EC 2.7.11.11)	4	9	4	30.8	40.707	103890000	109680000	113480000	83909000	93788000	90004000	0.818532	0.00783225
tr|E9PW56|E9PW56_MOUSE;tr|Q8BW77|Q8BW77_MOUSE;tr|Q148S3|Q148S3_MOUSE;sp|Q8BW10|NOB1_MOUSE	tr|E9PW56|E9PW56_MOUSE;tr|Q8BW77|Q8BW77_MOUSE;tr|Q148S3|Q148S3_MOUSE;sp|Q8BW10|NOB1_MOUSE	tr|E9PW56|E9PW56_MOUSE RNA-binding protein NOB1 OS=Mus musculus OX=10090 GN=Nob1 PE=1 SV=1;tr|Q8BW77|Q8BW77_MOUSE Uncharacterized protein OS=Mus musculus OX=10090 GN=Nob1 PE=2 SV=1;tr|Q148S3|Q148S3_MOUSE NIN1/RPN12 binding protein 1 homolog (S. cerevisiae)	E9PW56	Nob1	RNA-binding protein NOB1	4	2	2	13.8	18.082	12807000	11142000	17228000	28259000	29921000	NaN	2.11939	0.00794922
tr|Q91Z78|Q91Z78_MOUSE;tr|Q3TEW0|Q3TEW0_MOUSE;sp|Q9Z2F7|BNI3L_MOUSE	tr|Q91Z78|Q91Z78_MOUSE;tr|Q3TEW0|Q3TEW0_MOUSE;sp|Q9Z2F7|BNI3L_MOUSE	tr|Q91Z78|Q91Z78_MOUSE BCL2/adenovirus E1B 19 kDa protein-interacting protein 3-like OS=Mus musculus OX=10090 GN=Bnip3l PE=1 SV=1;tr|Q3TEW0|Q3TEW0_MOUSE Uncharacterized protein OS=Mus musculus OX=10090 GN=Bnip3l PE=2 SV=1;sp|Q9Z2F7|BNI3L_MOUSE BCL2/adenovi	Q91Z78	Bnip3l mCG_2480	BCL2/adenovirus E1B 19 kDa protein-interacting protein 3-like (MCG2480, isoform CRA_b) (SNix)	3	2	2	18.1	22.313	51633000	46661000	NaN	90472000	85570000	NaN	1.79097	0.00796864
sp|Q9QZH3|PPIE_MOUSE	sp|Q9QZH3|PPIE_MOUSE	sp|Q9QZH3|PPIE_MOUSE Peptidyl-prolyl cis-trans isomerase E OS=Mus musculus OX=10090 GN=Ppie PE=1 SV=2	Q9QZH3	Ppie Cyp33	Peptidyl-prolyl cis-trans isomerase E (PPIase E) (EC 5.2.1.8) (Cyclophilin E) (Cyclophilin-33) (Rotamase E)	1	6	6	29.2	33.448	87802000	81908000	87052000	76249000	73338000	76300000	0.879752	0.00797397
sp|P52432|RPAC1_MOUSE;tr|A1L3C2|A1L3C2_MOUSE;tr|G3UXX5|G3UXX5_MOUSE;tr|D3Z7Q8|D3Z7Q8_MOUSE;tr|D3Z3D6|D3Z3D6_MOUSE;tr|G3UX92|G3UX92_MOUSE	sp|P52432|RPAC1_MOUSE;tr|A1L3C2|A1L3C2_MOUSE;tr|G3UXX5|G3UXX5_MOUSE;tr|D3Z7Q8|D3Z7Q8_MOUSE;tr|D3Z3D6|D3Z3D6_MOUSE	sp|P52432|RPAC1_MOUSE DNA-directed RNA polymerases I and III subunit RPAC1 OS=Mus musculus OX=10090 GN=Polr1c PE=1 SV=3;tr|A1L3C2|A1L3C2_MOUSE Polr1c protein OS=Mus musculus OX=10090 GN=Polr1c PE=2 SV=1;tr|G3UXX5|G3UXX5_MOUSE DNA-directed RNA polymerases I	P52432	Polr1c Rpo1-1	DNA-directed RNA polymerases I and III subunit RPAC1 (DNA-directed RNA polymerase I subunit C) (RNA polymerases I and III subunit AC1) (AC40) (DNA-directed RNA polymerases I and III 40 kDa polypeptide) (RPA40) (RPC40)	6	8	8	36.4	39.106	69023000	86576000	92049000	124810000	124430000	113780000	1.46587	0.0079767
tr|Q0QEZ4|Q0QEZ4_MOUSE;sp|Q9CQA3|SDHB_MOUSE;tr|Q3TE45|Q3TE45_MOUSE;tr|Q9Z1Z5|Q9Z1Z5_MOUSE	tr|Q0QEZ4|Q0QEZ4_MOUSE;sp|Q9CQA3|SDHB_MOUSE;tr|Q3TE45|Q3TE45_MOUSE;tr|Q9Z1Z5|Q9Z1Z5_MOUSE	tr|Q0QEZ4|Q0QEZ4_MOUSE Succinate dehydrogenase [ubiquinone] iron-sulfur subunit, mitochondrial (Fragment) OS=Mus musculus OX=10090 GN=Sdhb PE=2 SV=1;sp|Q9CQA3|SDHB_MOUSE Succinate dehydrogenase [ubiquinone] iron-sulfur subunit, mitochondrial OS=Mus musculu	Q0QEZ4	Sdhb SDHB	Succinate dehydrogenase [ubiquinone] iron-sulfur subunit, mitochondrial (EC 1.3.5.1) (Fragment)	4	15	15	65.3	27.208	1104100000	1249900000	1108400000	893120000	911160000	934700000	0.791064	0.00814611
sp|P27612|PLAP_MOUSE;tr|F7D1R5|F7D1R5_MOUSE	sp|P27612|PLAP_MOUSE	sp|P27612|PLAP_MOUSE Phospholipase A-2-activating protein OS=Mus musculus OX=10090 GN=Plaa PE=1 SV=4	P27612	Plaa Plap	Phospholipase A-2-activating protein (PLA2P) (PLAP)	2	9	9	15.7	87.22	59983000	62486000	69426000	81102000	81374000	76553000	1.24562	0.00824005
tr|Q3U292|Q3U292_MOUSE	tr|Q3U292|Q3U292_MOUSE	tr|Q3U292|Q3U292_MOUSE Uncharacterized protein OS=Mus musculus OX=10090 GN=Hist1h1d PE=2 SV=1	Q3U292	Hist1h1d	H15 domain-containing protein	1	11	0	33.5	22.081	572480000	490990000	563350000	388710000	309070000	389030000	0.668058	0.00828159
tr|Q059U0|Q059U0_MOUSE;sp|Q8K3K7|PLCB_MOUSE;tr|Q9CWA8|Q9CWA8_MOUSE	tr|Q059U0|Q059U0_MOUSE;sp|Q8K3K7|PLCB_MOUSE	tr|Q059U0|Q059U0_MOUSE 1-acyl-sn-glycerol-3-phosphate acyltransferase OS=Mus musculus OX=10090 GN=Agpat2 PE=1 SV=1;sp|Q8K3K7|PLCB_MOUSE 1-acyl-sn-glycerol-3-phosphate acyltransferase beta OS=Mus musculus OX=10090 GN=Agpat2 PE=1 SV=1	Q059U0	Agpat2 mCG_11366	1-acyl-sn-glycerol-3-phosphate acyltransferase (EC 2.3.1.51)	3	3	3	15.8	31.01	35715000	33363000	30648000	44528000	43738000	50935000	1.39583	0.00829038
sp|Q9D8Z2|TRIA1_MOUSE	sp|Q9D8Z2|TRIA1_MOUSE	sp|Q9D8Z2|TRIA1_MOUSE TP53-regulated inhibitor of apoptosis 1 OS=Mus musculus OX=10090 GN=Triap1 PE=1 SV=1	Q9D8Z2	Triap1 15e1.1	TP53-regulated inhibitor of apoptosis 1 (Protein 15E1.1) (WF-1) (p53-inducible cell-survival factor) (p53CSV)	1	3	3	46.1	8.7558	17118000	15514000	16208000	29983000	26677000	22846000	1.62789	0.00842525
tr|Q8R2U8|Q8R2U8_MOUSE;sp|Q8BFP9|PDK1_MOUSE;tr|Q8BFP4|Q8BFP4_MOUSE	tr|Q8R2U8|Q8R2U8_MOUSE;sp|Q8BFP9|PDK1_MOUSE	tr|Q8R2U8|Q8R2U8_MOUSE Pdk1 protein OS=Mus musculus OX=10090 GN=Pdk1 PE=2 SV=1;sp|Q8BFP9|PDK1_MOUSE [Pyruvate dehydrogenase (acetyl-transferring)] kinase isozyme 1, mitochondrial OS=Mus musculus OX=10090 GN=Pdk1 PE=1 SV=2	Q8R2U8	Pdk1	Protein-serine/threonine kinase (EC 2.7.11.-)	3	8	7	26.4	48.836	37366000	38462000	39785000	52089000	51963000	62321000	1.43905	0.0084552
tr|Q8BVG3|Q8BVG3_MOUSE;sp|Q9CPV5|PMF1_MOUSE;tr|A0A0A6YVR2|A0A0A6YVR2_MOUSE	tr|Q8BVG3|Q8BVG3_MOUSE;sp|Q9CPV5|PMF1_MOUSE	tr|Q8BVG3|Q8BVG3_MOUSE Uncharacterized protein OS=Mus musculus OX=10090 GN=Pmf1 PE=2 SV=1;sp|Q9CPV5|PMF1_MOUSE Polyamine-modulated factor 1 OS=Mus musculus OX=10090 GN=Pmf1 PE=1 SV=1	Q8BVG3	Pmf1	Uncharacterized protein	3	3	3	16.9	22.339	11345000	9639000	11328000	18019000	17027000	14504000	1.53349	0.00845752
sp|P97807|FUMH_MOUSE;tr|H3BKG7|H3BKG7_MOUSE	sp|P97807|FUMH_MOUSE	sp|P97807|FUMH_MOUSE Fumarate hydratase, mitochondrial OS=Mus musculus OX=10090 GN=Fh PE=1 SV=3	P97807	Fh Fh1	Fumarate hydratase, mitochondrial (Fumarase) (EC 4.2.1.2) (EF-3)	2	26	26	64.9	54.356	2995000000	3116900000	3073200000	2558600000	2793100000	2713100000	0.878031	0.00853687
tr|Q3U893|Q3U893_MOUSE;sp|Q8C166|CPNE1_MOUSE;tr|Q571A1|Q571A1_MOUSE;tr|B7ZCP4|B7ZCP4_MOUSE;tr|B7ZCP6|B7ZCP6_MOUSE;tr|B7ZCP5|B7ZCP5_MOUSE;tr|E9Q806|E9Q806_MOUSE;tr|A3KGK7|A3KGK7_MOUSE;tr|B7ZCP7|B7ZCP7_MOUSE;tr|F6R587|F6R587_MOUSE	tr|Q3U893|Q3U893_MOUSE;sp|Q8C166|CPNE1_MOUSE;tr|Q571A1|Q571A1_MOUSE;tr|B7ZCP4|B7ZCP4_MOUSE;tr|B7ZCP6|B7ZCP6_MOUSE;tr|B7ZCP5|B7ZCP5_MOUSE;tr|E9Q806|E9Q806_MOUSE;tr|A3KGK7|A3KGK7_MOUSE	tr|Q3U893|Q3U893_MOUSE Uncharacterized protein OS=Mus musculus OX=10090 GN=Cpne1 PE=2 SV=1;sp|Q8C166|CPNE1_MOUSE Copine-1 OS=Mus musculus OX=10090 GN=Cpne1 PE=1 SV=1;tr|Q571A1|Q571A1_MOUSE MKIAA0765 splice variant 1 (Fragment) OS=Mus musculus OX=10090 GN=C	Q3U893	Cpne1	C2 domain-containing protein	10	5	4	12.5	58.928	NaN	24231000	24797000	NaN	20862000	20403000	0.841662	0.00869703
sp|Q61699|HS105_MOUSE;tr|E9Q0U7|E9Q0U7_MOUSE;tr|Q8C6H1|Q8C6H1_MOUSE;tr|D3Z027|D3Z027_MOUSE;tr|D3Z3I9|D3Z3I9_MOUSE;tr|A0A0J9YTZ7|A0A0J9YTZ7_MOUSE	sp|Q61699|HS105_MOUSE;tr|E9Q0U7|E9Q0U7_MOUSE	sp|Q61699|HS105_MOUSE Heat shock protein 105 kDa OS=Mus musculus OX=10090 GN=Hsph1 PE=1 SV=2;tr|E9Q0U7|E9Q0U7_MOUSE Heat shock protein 105 kDa OS=Mus musculus OX=10090 GN=Hsph1 PE=1 SV=1	Q61699	Hsph1 Hsp105 Hsp110 Kiaa0201	Heat shock protein 105 kDa (42 degrees C-HSP) (Heat shock 110 kDa protein) (Heat shock-related 100 kDa protein E7I) (HSP-E7I)	6	36	34	53.3	96.406	965710000	949960000	1050100000	1357500000	1383600000	1192300000	1.32627	0.00877692
tr|Q543M3|Q543M3_MOUSE;tr|Q3UHZ4|Q3UHZ4_MOUSE;tr|Q3U5U9|Q3U5U9_MOUSE;tr|Q3TT75|Q3TT75_MOUSE;sp|P06797|CATL1_MOUSE;tr|Q3UWH6|Q3UWH6_MOUSE;tr|Q9D0C0|Q9D0C0_MOUSE;tr|Q3TVJ1|Q3TVJ1_MOUSE;tr|Q3TNC8|Q3TNC8_MOUSE;tr|A0A1Y7VNM3|A0A1Y7VNM3_MOUSE;tr|A0A1Y7VNQ4|A0A1Y7VNQ4_MOUSE;tr|A0A1Y7VP49|A0A1Y7VP49_MOUSE;tr|Q6LAF5|Q6LAF5_MOUSE;tr|A0A1Y7VJC1|A0A1Y7VJC1_MOUSE;sp|Q9JI81|CAT8_MOUSE	tr|Q543M3|Q543M3_MOUSE;tr|Q3UHZ4|Q3UHZ4_MOUSE;tr|Q3U5U9|Q3U5U9_MOUSE;tr|Q3TT75|Q3TT75_MOUSE;sp|P06797|CATL1_MOUSE;tr|Q3UWH6|Q3UWH6_MOUSE;tr|Q9D0C0|Q9D0C0_MOUSE;tr|Q3TVJ1|Q3TVJ1_MOUSE;tr|Q3TNC8|Q3TNC8_MOUSE;tr|A0A1Y7VNM3|A0A1Y7VNM3_MOUSE;tr|A0A1Y7VNQ4|A0A1Y7VNQ4_MOUSE	tr|Q543M3|Q543M3_MOUSE Cathepsin L OS=Mus musculus OX=10090 GN=Ctsl PE=1 SV=1;tr|Q3UHZ4|Q3UHZ4_MOUSE Uncharacterized protein OS=Mus musculus OX=10090 GN=Ctsl PE=2 SV=1;tr|Q3U5U9|Q3U5U9_MOUSE Uncharacterized protein OS=Mus musculus OX=10090 GN=Ctsl PE=2 SV=	Q543M3	Ctsl mCG_14471	Cathepsin L	15	16	16	56.6	37.547	1208400000	1250300000	1283100000	1136500000	1082300000	1050600000	0.873751	0.00893229
sp|Q99JY0|ECHB_MOUSE;tr|D3YXU1|D3YXU1_MOUSE	sp|Q99JY0|ECHB_MOUSE	sp|Q99JY0|ECHB_MOUSE Trifunctional enzyme subunit beta, mitochondrial OS=Mus musculus OX=10090 GN=Hadhb PE=1 SV=1	Q99JY0	Hadhb	Trifunctional enzyme subunit beta, mitochondrial (TP-beta) [Includes: 3-ketoacyl-CoA thiolase (EC 2.3.1.155) (EC 2.3.1.16) (Acetyl-CoA acyltransferase) (Beta-ketothiolase)]	2	24	24	50.1	51.386	1255600000	1279700000	1300000000	1142900000	1175800000	1204300000	0.918572	0.00894091
tr|H3BK73|H3BK73_MOUSE;sp|Q8R1J9|TOR2A_MOUSE	tr|H3BK73|H3BK73_MOUSE;sp|Q8R1J9|TOR2A_MOUSE	tr|H3BK73|H3BK73_MOUSE Prosalusin (Fragment) OS=Mus musculus OX=10090 GN=Tor2a PE=1 SV=1;sp|Q8R1J9|TOR2A_MOUSE Torsin-2A OS=Mus musculus OX=10090 GN=Tor2a PE=1 SV=1	H3BK73	Tor2a	Prosalusin (Fragment)	2	2	2	13.4	30.07	13903000	14561000	14873000	12581000	13078000	13024000	0.892609	0.00894974
tr|Q68G78|Q68G78_MOUSE;tr|Q61478|Q61478_MOUSE;tr|Q64369|Q64369_MOUSE	tr|Q68G78|Q68G78_MOUSE;tr|Q61478|Q61478_MOUSE;tr|Q64369|Q64369_MOUSE	tr|Q68G78|Q68G78_MOUSE Csda protein OS=Mus musculus OX=10090 GN=Ybx3 PE=2 SV=1;tr|Q61478|Q61478_MOUSE DbpA murine homologue OS=Mus musculus OX=10090 GN=Ybx3 PE=2 SV=1;tr|Q64369|Q64369_MOUSE Y-box binding protein (Fragment) OS=Mus musculus OX=10090 GN=Igf2b	Q68G78	Ybx3 Csda	Csda protein	3	15	2	58.2	31.822	101920000	98149000	99502000	136190000	118860000	121990000	1.2586	0.00902044
sp|Q9D1B9|RM28_MOUSE	sp|Q9D1B9|RM28_MOUSE	sp|Q9D1B9|RM28_MOUSE 39S ribosomal protein L28, mitochondrial OS=Mus musculus OX=10090 GN=Mrpl28 PE=1 SV=3	Q9D1B9	Mrpl28	39S ribosomal protein L28, mitochondrial (L28mt) (MRP-L28)	1	5	5	26.1	30.169	48893000	44721000	48850000	56418000	65278000	62082000	1.29	0.0093836
tr|Q6PAC1|Q6PAC1_MOUSE;tr|Q3U9Q8|Q3U9Q8_MOUSE;tr|Q3UCW8|Q3UCW8_MOUSE;tr|Q3TGJ9|Q3TGJ9_MOUSE;sp|P13020|GELS_MOUSE;tr|A0A0J9YUQ8|A0A0J9YUQ8_MOUSE;CON__Q3SX14;tr|A6PWS5|A6PWS5_MOUSE;tr|A0A0J9YUJ8|A0A0J9YUJ8_MOUSE	tr|Q6PAC1|Q6PAC1_MOUSE;tr|Q3U9Q8|Q3U9Q8_MOUSE;tr|Q3UCW8|Q3UCW8_MOUSE;tr|Q3TGJ9|Q3TGJ9_MOUSE;sp|P13020|GELS_MOUSE;tr|A0A0J9YUQ8|A0A0J9YUQ8_MOUSE	tr|Q6PAC1|Q6PAC1_MOUSE Gelsolin, isoform CRA_c OS=Mus musculus OX=10090 GN=Gsn PE=2 SV=1;tr|Q3U9Q8|Q3U9Q8_MOUSE Uncharacterized protein OS=Mus musculus OX=10090 GN=Gsn PE=2 SV=1;tr|Q3UCW8|Q3UCW8_MOUSE Uncharacterized protein OS=Mus musculus OX=10090 GN=Gsn	Q6PAC1	Gsn mCG_21267	Gelsolin, isoform CRA_c (Gsn protein)	9	39	39	60.2	80.762	2330900000	2326200000	2308300000	2078900000	2210700000	2130400000	0.921699	0.00954623
tr|F6QKK2|F6QKK2_MOUSE;sp|Q8VEH3|ARL8A_MOUSE	tr|F6QKK2|F6QKK2_MOUSE;sp|Q8VEH3|ARL8A_MOUSE	tr|F6QKK2|F6QKK2_MOUSE ADP-ribosylation factor-like protein 8A (Fragment) OS=Mus musculus OX=10090 GN=Arl8a PE=1 SV=1;sp|Q8VEH3|ARL8A_MOUSE ADP-ribosylation factor-like protein 8A OS=Mus musculus OX=10090 GN=Arl8a PE=1 SV=1	F6QKK2	Arl8a	ADP-ribosylation factor-like protein 8A (Fragment)	2	8	4	62.4	18.756	398360000	357490000	375050000	322710000	323660000	313450000	0.848722	0.00969712
tr|E9PXY1|E9PXY1_MOUSE;sp|A2A432|CUL4B_MOUSE;tr|J3QJX0|J3QJX0_MOUSE;tr|Q3TP81|Q3TP81_MOUSE	tr|E9PXY1|E9PXY1_MOUSE;sp|A2A432|CUL4B_MOUSE;tr|J3QJX0|J3QJX0_MOUSE	tr|E9PXY1|E9PXY1_MOUSE Cullin-4B OS=Mus musculus OX=10090 GN=Cul4b PE=1 SV=2;sp|A2A432|CUL4B_MOUSE Cullin-4B OS=Mus musculus OX=10090 GN=Cul4b PE=1 SV=1;tr|J3QJX0|J3QJX0_MOUSE Cullin-4B OS=Mus musculus OX=10090 GN=Cul4b PE=1 SV=1	E9PXY1	Cul4b	Cullin-4B	4	15	6	18.2	102.41	111750000	121790000	133880000	160630000	152840000	171970000	1.32121	0.00970827
sp|Q8BKT7|THOC5_MOUSE;tr|A0A0R4J0J6|A0A0R4J0J6_MOUSE;tr|Q5SVF9|Q5SVF9_MOUSE;tr|Q5SVF8|Q5SVF8_MOUSE	sp|Q8BKT7|THOC5_MOUSE;tr|A0A0R4J0J6|A0A0R4J0J6_MOUSE;tr|Q5SVF9|Q5SVF9_MOUSE	sp|Q8BKT7|THOC5_MOUSE THO complex subunit 5 homolog OS=Mus musculus OX=10090 GN=Thoc5 PE=1 SV=2;tr|A0A0R4J0J6|A0A0R4J0J6_MOUSE THO complex subunit 5 homolog OS=Mus musculus OX=10090 GN=Thoc5 PE=1 SV=1;tr|Q5SVF9|Q5SVF9_MOUSE THO complex subunit 5 homolog OS	Q8BKT7	Thoc5 Fmip Kiaa0983	THO complex subunit 5 homolog (Fms-interacting protein) (FMIP)	4	19	19	40.7	78.685	224890000	238990000	223140000	198040000	186130000	203530000	0.855434	0.00994663
sp|Q925H1|TRPS1_MOUSE;tr|Q499D6|Q499D6_MOUSE;tr|G3UW90|G3UW90_MOUSE;tr|V9GX74|V9GX74_MOUSE;tr|V9GXA5|V9GXA5_MOUSE;tr|Q5XK21|Q5XK21_MOUSE;tr|Q3UQJ9|Q3UQJ9_MOUSE;tr|Q80V18|Q80V18_MOUSE;tr|Q8K1J0|Q8K1J0_MOUSE;tr|V9GXE9|V9GXE9_MOUSE;tr|H7BU27|H7BU27_MOUSE;tr|H7BU26|H7BU26_MOUSE;tr|Q8BZ62|Q8BZ62_MOUSE;tr|V9GX39|V9GX39_MOUSE	sp|Q925H1|TRPS1_MOUSE;tr|Q499D6|Q499D6_MOUSE;tr|G3UW90|G3UW90_MOUSE;tr|V9GX74|V9GX74_MOUSE;tr|V9GXA5|V9GXA5_MOUSE;tr|Q5XK21|Q5XK21_MOUSE;tr|Q3UQJ9|Q3UQJ9_MOUSE;tr|Q80V18|Q80V18_MOUSE;tr|Q8K1J0|Q8K1J0_MOUSE;tr|V9GXE9|V9GXE9_MOUSE	sp|Q925H1|TRPS1_MOUSE Zinc finger transcription factor Trps1 OS=Mus musculus OX=10090 GN=Trps1 PE=1 SV=1;tr|Q499D6|Q499D6_MOUSE Trps1 protein OS=Mus musculus OX=10090 GN=Trps1 PE=2 SV=1;tr|G3UW90|G3UW90_MOUSE Trichorhinophalangeal syndrome I (Human), isofo	Q925H1	Trps1	Zinc finger transcription factor Trps1	14	12	12	13.6	141.03	35183000	40605000	38720000	45391000	48445000	46088000	1.22196	0.00996656
tr|A0A1B0GRU8|A0A1B0GRU8_MOUSE;sp|Q9R1C7|PR40A_MOUSE;tr|A0JLM8|A0JLM8_MOUSE;tr|A0PJI0|A0PJI0_MOUSE	tr|A0A1B0GRU8|A0A1B0GRU8_MOUSE;sp|Q9R1C7|PR40A_MOUSE	tr|A0A1B0GRU8|A0A1B0GRU8_MOUSE Pre-mRNA-processing factor 40 homolog A OS=Mus musculus OX=10090 GN=Prpf40a PE=1 SV=1;sp|Q9R1C7|PR40A_MOUSE Pre-mRNA-processing factor 40 homolog A OS=Mus musculus OX=10090 GN=Prpf40a PE=1 SV=1	A0A1B0GRU8	Prpf40a	Pre-mRNA-processing factor 40 homolog A	4	29	29	27.9	105.53	1755300000	1714800000	1633900000	1881500000	1865600000	1857800000	1.09814	0.0100923
tr|A0A0R4J254|A0A0R4J254_MOUSE;sp|Q9ESJ0|XPO4_MOUSE;tr|Q8C976|Q8C976_MOUSE;tr|G3UX04|G3UX04_MOUSE;tr|Q3TQK5|Q3TQK5_MOUSE	tr|A0A0R4J254|A0A0R4J254_MOUSE;sp|Q9ESJ0|XPO4_MOUSE	tr|A0A0R4J254|A0A0R4J254_MOUSE Exportin-4 OS=Mus musculus OX=10090 GN=Xpo4 PE=1 SV=1;sp|Q9ESJ0|XPO4_MOUSE Exportin-4 OS=Mus musculus OX=10090 GN=Xpo4 PE=1 SV=2	A0A0R4J254	Xpo4	Exportin-4	5	7	7	8.2	129.96	32090000	35898000	37760000	46621000	43774000	42896000	1.26046	0.0103149
tr|E9PXE6|E9PXE6_MOUSE;tr|F8VPR2|F8VPR2_MOUSE;tr|A2AQW2|A2AQW2_MOUSE;sp|A2APV2|FMNL2_MOUSE;tr|Q6P247|Q6P247_MOUSE;tr|Q8BI52|Q8BI52_MOUSE	tr|E9PXE6|E9PXE6_MOUSE;tr|F8VPR2|F8VPR2_MOUSE;tr|A2AQW2|A2AQW2_MOUSE;sp|A2APV2|FMNL2_MOUSE	tr|E9PXE6|E9PXE6_MOUSE Formin-like protein 2 OS=Mus musculus OX=10090 GN=Fmnl2 PE=1 SV=2;tr|F8VPR2|F8VPR2_MOUSE Formin-like protein 2 OS=Mus musculus OX=10090 GN=Fmnl2 PE=1 SV=1;tr|A2AQW2|A2AQW2_MOUSE Formin-like protein 2 OS=Mus musculus OX=10090 GN=Fmnl2	E9PXE6	Fmnl2	Formin-like protein 2	6	10	7	10.8	117.95	68481000	74994000	68999000	58028000	50904000	58808000	0.789461	0.0103374
tr|Q547R0|Q547R0_MOUSE;tr|E9QAT0|E9QAT0_MOUSE;tr|Q6AXB7|Q6AXB7_MOUSE;sp|P35922|FMR1_MOUSE;tr|D3Z6U8|D3Z6U8_MOUSE;tr|E9QNF5|E9QNF5_MOUSE;tr|E9QAS8|E9QAS8_MOUSE;tr|E9QAS9|E9QAS9_MOUSE;tr|Q8BPK8|Q8BPK8_MOUSE;tr|Q8BPN5|Q8BPN5_MOUSE;tr|Q925S6|Q925S6_MOUSE	tr|Q547R0|Q547R0_MOUSE;tr|E9QAT0|E9QAT0_MOUSE;tr|Q6AXB7|Q6AXB7_MOUSE;sp|P35922|FMR1_MOUSE;tr|D3Z6U8|D3Z6U8_MOUSE;tr|E9QNF5|E9QNF5_MOUSE;tr|E9QAS8|E9QAS8_MOUSE;tr|E9QAS9|E9QAS9_MOUSE;tr|Q8BPK8|Q8BPK8_MOUSE;tr|Q8BPN5|Q8BPN5_MOUSE	tr|Q547R0|Q547R0_MOUSE Fragile X mental retardation protein FMRP OS=Mus musculus OX=10090 GN=Fmr1 PE=2 SV=1;tr|E9QAT0|E9QAT0_MOUSE Synaptic functional regulator FMR1 OS=Mus musculus OX=10090 GN=Fmr1 PE=1 SV=1;tr|Q6AXB7|Q6AXB7_MOUSE Fragile X mental retarda	Q547R0	Fmr1	Fragile X mental retardation protein FMRP	11	14	12	34	66.269	130020000	116660000	129670000	166680000	147950000	157030000	1.25325	0.0103496
tr|D3Z7P2|D3Z7P2_MOUSE;tr|D3Z3Z2|D3Z3Z2_MOUSE;tr|D3YX08|D3YX08_MOUSE;tr|D3Z0I8|D3Z0I8_MOUSE;sp|Q3UBX0|TM109_MOUSE	tr|D3Z7P2|D3Z7P2_MOUSE;tr|D3Z3Z2|D3Z3Z2_MOUSE;tr|D3YX08|D3YX08_MOUSE;tr|D3Z0I8|D3Z0I8_MOUSE;sp|Q3UBX0|TM109_MOUSE	tr|D3Z7P2|D3Z7P2_MOUSE Transmembrane protein 109 (Fragment) OS=Mus musculus OX=10090 GN=Tmem109 PE=1 SV=1;tr|D3Z3Z2|D3Z3Z2_MOUSE Transmembrane protein 109 (Fragment) OS=Mus musculus OX=10090 GN=Tmem109 PE=1 SV=1;tr|D3YX08|D3YX08_MOUSE Transmembrane protein	D3Z7P2	Tmem109	Transmembrane protein 109 (Fragment)	5	2	2	28.8	8.0252	227380000	256120000	239620000	146100000	193520000	164750000	0.697491	0.0106109
tr|Q3UPA1|Q3UPA1_MOUSE;sp|P21278|GNA11_MOUSE;tr|Q91X95|Q91X95_MOUSE;tr|Q8CBT5|Q8CBT5_MOUSE;sp|P30677|GNA14_MOUSE;tr|Q8C3M7|Q8C3M7_MOUSE;tr|Q542R8|Q542R8_MOUSE;tr|Q3UYF9|Q3UYF9_MOUSE;sp|O70443|GNAZ_MOUSE	tr|Q3UPA1|Q3UPA1_MOUSE;sp|P21278|GNA11_MOUSE;tr|Q91X95|Q91X95_MOUSE	tr|Q3UPA1|Q3UPA1_MOUSE Guanine nucleotide binding protein, alpha 11 OS=Mus musculus OX=10090 GN=Gna11 PE=1 SV=1;sp|P21278|GNA11_MOUSE Guanine nucleotide-binding protein subunit alpha-11 OS=Mus musculus OX=10090 GN=Gna11 PE=1 SV=1;tr|Q91X95|Q91X95_MOUSE Gua	Q3UPA1	Gna11 mCG_12089	Guanine nucleotide binding protein, alpha 11	9	15	9	48.2	42.024	271210000	242350000	253450000	218050000	215570000	219060000	0.850941	0.0108208
sp|Q91V81|RBM42_MOUSE;tr|D3YYW8|D3YYW8_MOUSE	sp|Q91V81|RBM42_MOUSE;tr|D3YYW8|D3YYW8_MOUSE	sp|Q91V81|RBM42_MOUSE RNA-binding protein 42 OS=Mus musculus OX=10090 GN=Rbm42 PE=1 SV=1;tr|D3YYW8|D3YYW8_MOUSE RNA-binding protein 42 OS=Mus musculus OX=10090 GN=Rbm42 PE=1 SV=1	Q91V81	Rbm42	RNA-binding protein 42 (RNA-binding motif protein 42)	2	8	8	20.7	49.875	87211000	81497000	77463000	95227000	97203000	93873000	1.16302	0.0110229
sp|Q99LL5|PWP1_MOUSE;tr|Q8BW04|Q8BW04_MOUSE;tr|A0A1W2P7U7|A0A1W2P7U7_MOUSE;tr|Q9CSK2|Q9CSK2_MOUSE;tr|A0A1W2P8G3|A0A1W2P8G3_MOUSE;tr|Q9CTC0|Q9CTC0_MOUSE	sp|Q99LL5|PWP1_MOUSE;tr|Q8BW04|Q8BW04_MOUSE	sp|Q99LL5|PWP1_MOUSE Periodic tryptophan protein 1 homolog OS=Mus musculus OX=10090 GN=Pwp1 PE=1 SV=1;tr|Q8BW04|Q8BW04_MOUSE Uncharacterized protein OS=Mus musculus OX=10090 GN=Pwp1 PE=2 SV=1	Q99LL5	Pwp1	Periodic tryptophan protein 1 homolog	6	9	9	23.2	55.586	158990000	140960000	128680000	191370000	191550000	177850000	1.30828	0.011264
sp|Q9JLR1|S61A2_MOUSE;tr|Q9CYJ6|Q9CYJ6_MOUSE;tr|A0A0A6YVQ7|A0A0A6YVQ7_MOUSE	sp|Q9JLR1|S61A2_MOUSE;tr|Q9CYJ6|Q9CYJ6_MOUSE	sp|Q9JLR1|S61A2_MOUSE Protein transport protein Sec61 subunit alpha isoform 2 OS=Mus musculus OX=10090 GN=Sec61a2 PE=2 SV=3;tr|Q9CYJ6|Q9CYJ6_MOUSE Protein transport protein Sec61 subunit alpha isoform 2 OS=Mus musculus OX=10090 GN=Sec61a2 PE=1 SV=1	Q9JLR1	Sec61a2	Protein transport protein Sec61 subunit alpha isoform 2 (Sec61 alpha-2)	3	8	3	13.9	52.247	112080000	115180000	110650000	102120000	103650000	106740000	0.924832	0.0113209
tr|D3YZ62|D3YZ62_MOUSE;sp|Q99104|MYO5A_MOUSE;tr|D3Z4J3|D3Z4J3_MOUSE;tr|F6TDE5|F6TDE5_MOUSE;tr|Q8BWY8|Q8BWY8_MOUSE;tr|E9Q1F5|E9Q1F5_MOUSE;tr|G5E8G6|G5E8G6_MOUSE;sp|P21271|MYO5B_MOUSE;tr|G3X9Y9|G3X9Y9_MOUSE;tr|F6Z2S4|F6Z2S4_MOUSE;tr|B8JK05|B8JK05_MOUSE;tr|A0A1L1SUF0|A0A1L1SUF0_MOUSE;tr|D6RFU0|D6RFU0_MOUSE;tr|D3Z135|D3Z135_MOUSE	tr|D3YZ62|D3YZ62_MOUSE;sp|Q99104|MYO5A_MOUSE;tr|D3Z4J3|D3Z4J3_MOUSE	tr|D3YZ62|D3YZ62_MOUSE Unconventional myosin-Va OS=Mus musculus OX=10090 GN=Myo5a PE=1 SV=1;sp|Q99104|MYO5A_MOUSE Unconventional myosin-Va OS=Mus musculus OX=10090 GN=Myo5a PE=1 SV=2;tr|D3Z4J3|D3Z4J3_MOUSE Unconventional myosin-Va OS=Mus musculus OX=10090	D3YZ62	Myo5a	Unconventional myosin-Va	14	17	17	11.8	212.33	281650000	272710000	253690000	203270000	203890000	232420000	0.79151	0.0113885
tr|D3Z0M9|D3Z0M9_MOUSE	tr|D3Z0M9|D3Z0M9_MOUSE	tr|D3Z0M9|D3Z0M9_MOUSE DEAD (Asp-Glu-Ala-Asp) box polypeptide 23 OS=Mus musculus OX=10090 GN=Ddx23 PE=1 SV=1	D3Z0M9	Ddx23 mCG_18410	DEAD (Asp-Glu-Ala-Asp) box polypeptide 23 (MCG18410, isoform CRA_a)	1	32	32	42.7	95.493	617010000	638360000	652030000	677210000	687060000	683940000	1.07382	0.0114268
tr|Q99KL9|Q99KL9_MOUSE;tr|Q3TE40|Q3TE40_MOUSE;sp|Q62193|RFA2_MOUSE;tr|F6V8R7|F6V8R7_MOUSE	tr|Q99KL9|Q99KL9_MOUSE;tr|Q3TE40|Q3TE40_MOUSE;sp|Q62193|RFA2_MOUSE	tr|Q99KL9|Q99KL9_MOUSE Replication protein A2 OS=Mus musculus OX=10090 GN=Rpa2 PE=2 SV=1;tr|Q3TE40|Q3TE40_MOUSE Replication protein A 32 kDa subunit OS=Mus musculus OX=10090 GN=Rpa2 PE=1 SV=1;sp|Q62193|RFA2_MOUSE Replication protein A 32 kDa subunit OS=Mus	Q99KL9	Rpa2	Replication protein A2	4	6	6	38.9	29.43	80150000	91966000	78742000	63933000	61915000	66546000	0.766944	0.0114492
sp|Q8BGC0|HTSF1_MOUSE	sp|Q8BGC0|HTSF1_MOUSE	sp|Q8BGC0|HTSF1_MOUSE HIV Tat-specific factor 1 homolog OS=Mus musculus OX=10090 GN=Htatsf1 PE=1 SV=1	Q8BGC0	Htatsf1	HIV Tat-specific factor 1 homolog	1	6	6	10.8	86.239	32033000	NaN	34516000	40684000	41251000	39019000	1.21168	0.0114696
sp|Q9CQ49|NCBP2_MOUSE;tr|A0A1S6GWH9|A0A1S6GWH9_MOUSE;tr|A0A1S6GWH8|A0A1S6GWH8_MOUSE;tr|A0A338P7L9|A0A338P7L9_MOUSE	sp|Q9CQ49|NCBP2_MOUSE;tr|A0A1S6GWH9|A0A1S6GWH9_MOUSE;tr|A0A1S6GWH8|A0A1S6GWH8_MOUSE;tr|A0A338P7L9|A0A338P7L9_MOUSE	sp|Q9CQ49|NCBP2_MOUSE Nuclear cap-binding protein subunit 2 OS=Mus musculus OX=10090 GN=Ncbp2 PE=1 SV=1;tr|A0A1S6GWH9|A0A1S6GWH9_MOUSE Nuclear cap-binding protein subunit 2 OS=Mus musculus OX=10090 GN=Ncbp2 PE=2 SV=1;tr|A0A1S6GWH8|A0A1S6GWH8_MOUSE Nuclear	Q9CQ49	Ncbp2 Cbp20	Nuclear cap-binding protein subunit 2 (20 kDa nuclear cap-binding protein) (NCBP 20 kDa subunit) (CBP20)	4	6	6	36.5	18.017	125290000	133450000	119370000	142660000	147900000	151580000	1.16934	0.0115453
sp|Q80V26|IMPA3_MOUSE	sp|Q80V26|IMPA3_MOUSE	sp|Q80V26|IMPA3_MOUSE Inositol monophosphatase 3 OS=Mus musculus OX=10090 GN=Impad1 PE=1 SV=1	Q80V26	Impad1 Impa3	Inositol monophosphatase 3 (IMP 3) (IMPase 3) (EC 3.1.3.25) (EC 3.1.3.7) (Golgi 3-prime phosphoadenosine 5-prime phosphate 3-prime phosphatase) (Golgi-resident PAP phosphatase) (gPAPP) (Inositol monophosphatase domain-containing protein 1) (Inositol-1(or 4)-monophosphatase 3) (Myo-inositol monophosphatase A3)	1	6	6	21.1	38.616	148120000	121960000	111960000	171460000	177320000	184490000	1.39585	0.0115623
sp|Q80SW1|SAHH2_MOUSE;tr|H3BKT5|H3BKT5_MOUSE;tr|Q80TQ9|Q80TQ9_MOUSE;tr|F8WI65|F8WI65_MOUSE;tr|F8WGT1|F8WGT1_MOUSE;sp|Q68FL4|SAHH3_MOUSE;tr|Q3TSQ0|Q3TSQ0_MOUSE;tr|Q80WX1|Q80WX1_MOUSE;tr|F7ATQ6|F7ATQ6_MOUSE;tr|D3Z2Q0|D3Z2Q0_MOUSE	sp|Q80SW1|SAHH2_MOUSE;tr|H3BKT5|H3BKT5_MOUSE;tr|Q80TQ9|Q80TQ9_MOUSE;tr|F8WI65|F8WI65_MOUSE;tr|F8WGT1|F8WGT1_MOUSE;sp|Q68FL4|SAHH3_MOUSE	sp|Q80SW1|SAHH2_MOUSE S-adenosylhomocysteine hydrolase-like protein 1 OS=Mus musculus OX=10090 GN=Ahcyl1 PE=1 SV=1;tr|H3BKT5|H3BKT5_MOUSE Adenosylhomocysteinase OS=Mus musculus OX=10090 GN=Ahcyl2 PE=1 SV=1;tr|Q80TQ9|Q80TQ9_MOUSE Adenosylhomocysteinase (Fra	Q80SW1	Ahcyl1 Irbit	S-adenosylhomocysteine hydrolase-like protein 1 (IP3R-binding protein released with inositol 1,4,5-trisphosphate) (Putative adenosylhomocysteinase 2) (S-adenosyl-L-homocysteine hydrolase 2) (AdoHcyase 2)	10	10	10	23.4	58.951	143330000	143830000	142180000	199340000	179400000	168740000	1.27517	0.011831
tr|Q9DC36|Q9DC36_MOUSE;sp|Q60634|FLOT2_MOUSE;tr|Q8CDE0|Q8CDE0_MOUSE;tr|Q5SS83|Q5SS83_MOUSE;tr|Q3UEG9|Q3UEG9_MOUSE	tr|Q9DC36|Q9DC36_MOUSE;sp|Q60634|FLOT2_MOUSE;tr|Q8CDE0|Q8CDE0_MOUSE;tr|Q5SS83|Q5SS83_MOUSE;tr|Q3UEG9|Q3UEG9_MOUSE	tr|Q9DC36|Q9DC36_MOUSE Uncharacterized protein OS=Mus musculus OX=10090 GN=Flot2 PE=2 SV=1;sp|Q60634|FLOT2_MOUSE Flotillin-2 OS=Mus musculus OX=10090 GN=Flot2 PE=1 SV=2;tr|Q8CDE0|Q8CDE0_MOUSE Uncharacterized protein OS=Mus musculus OX=10090 GN=Flot2 PE=2 S	Q9DC36	Flot2	PHB domain-containing protein	5	21	21	57.5	47.008	632160000	655130000	632900000	678730000	675170000	695730000	1.06741	0.0118752
tr|Q5HZH8|Q5HZH8_MOUSE;tr|Q3TV93|Q3TV93_MOUSE;sp|Q9Z1B5|MD2L1_MOUSE;tr|Q9D802|Q9D802_MOUSE	tr|Q5HZH8|Q5HZH8_MOUSE;tr|Q3TV93|Q3TV93_MOUSE;sp|Q9Z1B5|MD2L1_MOUSE;tr|Q9D802|Q9D802_MOUSE	tr|Q5HZH8|Q5HZH8_MOUSE MAD2 mitotic arrest deficient-like 1 (Yeast) OS=Mus musculus OX=10090 GN=Mad2l1 PE=1 SV=1;tr|Q3TV93|Q3TV93_MOUSE Uncharacterized protein OS=Mus musculus OX=10090 GN=Mad2l1 PE=2 SV=1;sp|Q9Z1B5|MD2L1_MOUSE Mitotic spindle assembly chec	Q5HZH8	Mad2l1 mCG_125314	MAD2 mitotic arrest deficient-like 1 (Yeast) (MCG125314, isoform CRA_a)	4	4	4	20.5	23.598	38725000	42122000	49379000	55961000	58159000	59916000	1.33642	0.0119949
sp|O09005|DEGS1_MOUSE	sp|O09005|DEGS1_MOUSE	sp|O09005|DEGS1_MOUSE Sphingolipid delta(4)-desaturase DES1 OS=Mus musculus OX=10090 GN=Degs1 PE=1 SV=1	O09005	Degs1 Degs Des1 Mdes	Sphingolipid delta(4)-desaturase DES1 (EC 1.14.19.17) (Degenerative spermatocyte homolog 1)	1	4	4	15.8	38.241	593060000	616410000	554070000	488710000	516700000	481200000	0.842969	0.0120193
tr|E9QAS4|E9QAS4_MOUSE;sp|Q6PDQ2|CHD4_MOUSE;tr|E9QAS5|E9QAS5_MOUSE;tr|Q5DTP7|Q5DTP7_MOUSE;tr|Q99JM0|Q99JM0_MOUSE;tr|Q8BM83|Q8BM83_MOUSE;tr|Q3U582|Q3U582_MOUSE;tr|F6WR45|F6WR45_MOUSE;tr|Q3UFM8|Q3UFM8_MOUSE;tr|E9PYU4|E9PYU4_MOUSE;sp|A2A8L1|CHD5_MOUSE;tr|E9PYL1|E9PYL1_MOUSE;tr|Q3ULG0|Q3ULG0_MOUSE;tr|Q4QQN1|Q4QQN1_MOUSE;tr|Q8BL30|Q8BL30_MOUSE;tr|Q8K0T3|Q8K0T3_MOUSE	tr|E9QAS4|E9QAS4_MOUSE;sp|Q6PDQ2|CHD4_MOUSE;tr|E9QAS5|E9QAS5_MOUSE;tr|Q5DTP7|Q5DTP7_MOUSE;tr|Q99JM0|Q99JM0_MOUSE	tr|E9QAS4|E9QAS4_MOUSE Chromodomain-helicase-DNA-binding protein 4 OS=Mus musculus OX=10090 GN=Chd4 PE=1 SV=1;sp|Q6PDQ2|CHD4_MOUSE Chromodomain-helicase-DNA-binding protein 4 OS=Mus musculus OX=10090 GN=Chd4 PE=1 SV=1;tr|E9QAS5|E9QAS5_MOUSE Chromodomain-he	E9QAS4	Chd4	Chromodomain-helicase-DNA-binding protein 4	16	62	56	41	216.37	1401600000	1422100000	1485300000	1653200000	1582000000	1562400000	1.11339	0.0120635
tr|Q3B7C1|Q3B7C1_MOUSE	tr|Q3B7C1|Q3B7C1_MOUSE	tr|Q3B7C1|Q3B7C1_MOUSE Hp1bp3 protein (Fragment) OS=Mus musculus OX=10090 GN=Hp1bp3 PE=2 SV=1	Q3B7C1	Hp1bp3	Hp1bp3 protein (Fragment)	1	8	2	32	27.206	NaN	20800000	26677000	35859000	37182000	35536000	1.52463	0.0121273
sp|Q62093|SRSF2_MOUSE;tr|Q8C671|Q8C671_MOUSE;tr|Q06477|Q06477_MOUSE	sp|Q62093|SRSF2_MOUSE;tr|Q8C671|Q8C671_MOUSE	sp|Q62093|SRSF2_MOUSE Serine/arginine-rich splicing factor 2 OS=Mus musculus OX=10090 GN=Srsf2 PE=1 SV=4;tr|Q8C671|Q8C671_MOUSE Uncharacterized protein OS=Mus musculus OX=10090 GN=Srsf2 PE=2 SV=1	Q62093	Srsf2 Pr264 Sfrs10 Sfrs2	Serine/arginine-rich splicing factor 2 (Protein PR264) (Putative myelin regulatory factor 1) (MRF-1) (Splicing component, 35 kDa) (Splicing factor SC35) (SC-35) (Splicing factor, arginine/serine-rich 2)	3	7	7	33.5	25.476	2154200000	2129800000	2084600000	2249000000	2225800000	2205800000	1.04899	0.0121537
sp|Q3URE1|ACSF3_MOUSE;tr|A0A1D5RMC8|A0A1D5RMC8_MOUSE	sp|Q3URE1|ACSF3_MOUSE;tr|A0A1D5RMC8|A0A1D5RMC8_MOUSE	sp|Q3URE1|ACSF3_MOUSE Acyl-CoA synthetase family member 3, mitochondrial OS=Mus musculus OX=10090 GN=Acsf3 PE=1 SV=2;tr|A0A1D5RMC8|A0A1D5RMC8_MOUSE Acyl-CoA synthetase family member 3, mitochondrial OS=Mus musculus OX=10090 GN=Acsf3 PE=1 SV=1	Q3URE1	Acsf3	Malonate--CoA ligase ACSF3, mitochondrial (EC 6.2.1.n3) (Acyl-CoA synthetase family member 3)	2	7	7	20.1	65.076	31132000	33268000	37870000	23652000	24576000	26274000	0.728483	0.0122225
tr|A1L367|A1L367_MOUSE;tr|A1L366|A1L366_MOUSE;sp|Q61550|RAD21_MOUSE;tr|Q3TG35|Q3TG35_MOUSE;tr|Q3UTE4|Q3UTE4_MOUSE;tr|Q6ZQJ6|Q6ZQJ6_MOUSE;tr|A0A2I3BS25|A0A2I3BS25_MOUSE	tr|A1L367|A1L367_MOUSE;tr|A1L366|A1L366_MOUSE;sp|Q61550|RAD21_MOUSE;tr|Q3TG35|Q3TG35_MOUSE;tr|Q3UTE4|Q3UTE4_MOUSE;tr|Q6ZQJ6|Q6ZQJ6_MOUSE	tr|A1L367|A1L367_MOUSE RAD21 homolog (S. pombe) OS=Mus musculus OX=10090 GN=Rad21 PE=2 SV=1;tr|A1L366|A1L366_MOUSE RAD21 homolog (S. pombe) OS=Mus musculus OX=10090 GN=Rad21 PE=2 SV=1;sp|Q61550|RAD21_MOUSE Double-strand-break repair protein rad21 homolog O	A1L367	Rad21 mCG_19537	RAD21 homolog (S. pombe)	7	17	16	43.5	72.022	157710000	165520000	157290000	181450000	172170000	176280000	1.10276	0.0122314
tr|Q6IQY0|Q6IQY0_MOUSE;tr|Q6PG98|Q6PG98_MOUSE;sp|Q61578|ADRO_MOUSE;tr|Q3UZ58|Q3UZ58_MOUSE	tr|Q6IQY0|Q6IQY0_MOUSE;tr|Q6PG98|Q6PG98_MOUSE;sp|Q61578|ADRO_MOUSE;tr|Q3UZ58|Q3UZ58_MOUSE	tr|Q6IQY0|Q6IQY0_MOUSE NADPH:adrenodoxin oxidoreductase, mitochondrial OS=Mus musculus OX=10090 GN=Fdxr PE=2 SV=1;tr|Q6PG98|Q6PG98_MOUSE Fdxr protein (Fragment) OS=Mus musculus OX=10090 GN=Fdxr PE=2 SV=1;sp|Q61578|ADRO_MOUSE NADPH:adrenodoxin oxidoreductas	Q6IQY0	Fdxr	NADPH:adrenodoxin oxidoreductase, mitochondrial (EC 1.18.1.6)	4	12	12	36.4	54.206	158590000	167540000	154780000	113020000	133820000	133000000	0.789836	0.0123549
tr|Q8C9M6|Q8C9M6_MOUSE;sp|Q9CQP0|RM33_MOUSE;tr|Q8R0E2|Q8R0E2_MOUSE	tr|Q8C9M6|Q8C9M6_MOUSE;sp|Q9CQP0|RM33_MOUSE	tr|Q8C9M6|Q8C9M6_MOUSE Uncharacterized protein OS=Mus musculus OX=10090 PE=2 SV=1;sp|Q9CQP0|RM33_MOUSE 39S ribosomal protein L33, mitochondrial OS=Mus musculus OX=10090 GN=Mrpl33 PE=1 SV=1	Q8C9M6		Uncharacterized protein	3	3	3	50.8	7.6761	36274000	34488000	31533000	24078000	22082000	27846000	0.723457	0.0124578
tr|Q3TQR3|Q3TQR3_MOUSE;sp|P59325|IF5_MOUSE;tr|Q3TKY2|Q3TKY2_MOUSE;tr|Q8BVV6|Q8BVV6_MOUSE;tr|Q05CM5|Q05CM5_MOUSE;tr|Q05CH7|Q05CH7_MOUSE;tr|A0A1Y7VNP4|A0A1Y7VNP4_MOUSE;tr|Q05CY6|Q05CY6_MOUSE;tr|Q3TT65|Q3TT65_MOUSE;tr|A0A1Y7VJG2|A0A1Y7VJG2_MOUSE;tr|Q6PHA6|Q6PHA6_MOUSE;tr|Q05C65|Q05C65_MOUSE;tr|A0A1Y7VKT5|A0A1Y7VKT5_MOUSE;tr|A0A1Y7VLL6|A0A1Y7VLL6_MOUSE;tr|A0A1Y7VLQ0|A0A1Y7VLQ0_MOUSE;tr|A0A1Y7VLK2|A0A…	tr|Q3TQR3|Q3TQR3_MOUSE;sp|P59325|IF5_MOUSE;tr|Q3TKY2|Q3TKY2_MOUSE;tr|Q8BVV6|Q8BVV6_MOUSE;tr|Q05CM5|Q05CM5_MOUSE;tr|Q05CH7|Q05CH7_MOUSE;tr|A0A1Y7VNP4|A0A1Y7VNP4_MOUSE;tr|Q05CY6|Q05CY6_MOUSE;tr|Q3TT65|Q3TT65_MOUSE;tr|A0A1Y7VJG2|A0A1Y7VJG2_MOUSE;tr|Q6PHA6|Q6PHA6_MOUSE;tr|Q05C65|Q05C65_MOUSE	tr|Q3TQR3|Q3TQR3_MOUSE MCG118037 OS=Mus musculus OX=10090 GN=Eif5 PE=1 SV=1;sp|P59325|IF5_MOUSE Eukaryotic translation initiation factor 5 OS=Mus musculus OX=10090 GN=Eif5 PE=1 SV=1;tr|Q3TKY2|Q3TKY2_MOUSE Uncharacterized protein (Fragment) OS=Mus musculus	Q3TQR3	Eif5 mCG_118037 mCG_119306	MCG118037 (MCG119306, isoform CRA_b)	16	15	15	34.5	48.968	228990000	241920000	248230000	273010000	263560000	265120000	1.11479	0.0124728
sp|P32020|NLTP_MOUSE;tr|A2APS4|A2APS4_MOUSE	sp|P32020|NLTP_MOUSE	sp|P32020|NLTP_MOUSE Non-specific lipid-transfer protein OS=Mus musculus OX=10090 GN=Scp2 PE=1 SV=3	P32020	Scp2 Scp-2	Non-specific lipid-transfer protein (NSL-TP) (EC 2.3.1.176) (Propanoyl-CoA C-acyltransferase) (SCP-chi) (SCPX) (Sterol carrier protein 2) (SCP-2) (Sterol carrier protein X) (SCP-X)	2	16	16	26.7	59.125	369380000	365570000	345260000	322680000	328520000	328750000	0.907185	0.0124974
tr|Q91WP1|Q91WP1_MOUSE;tr|Q8K094|Q8K094_MOUSE;tr|Q8BVF6|Q8BVF6_MOUSE;tr|Q60977|Q60977_MOUSE	tr|Q91WP1|Q91WP1_MOUSE;tr|Q8K094|Q8K094_MOUSE;tr|Q8BVF6|Q8BVF6_MOUSE	tr|Q91WP1|Q91WP1_MOUSE Cd155 OS=Mus musculus OX=10090 GN=Pvr PE=2 SV=1;tr|Q8K094|Q8K094_MOUSE Poliovirus receptor OS=Mus musculus OX=10090 GN=Pvr PE=1 SV=1;tr|Q8BVF6|Q8BVF6_MOUSE Uncharacterized protein OS=Mus musculus OX=10090 GN=Pvr PE=2 SV=1	Q91WP1	Pvr cd155 D7Ertd458e	Cd155 (Poliovirus receptor)	4	7	7	20.8	44.654	116750000	126590000	112770000	102370000	94118000	98380000	0.828025	0.0126536
tr|A0A0J9YV20|A0A0J9YV20_MOUSE;tr|A0A0R4J0B7|A0A0R4J0B7_MOUSE;sp|Q80UZ2|SDA1_MOUSE	tr|A0A0J9YV20|A0A0J9YV20_MOUSE;tr|A0A0R4J0B7|A0A0R4J0B7_MOUSE;sp|Q80UZ2|SDA1_MOUSE	tr|A0A0J9YV20|A0A0J9YV20_MOUSE Protein SDA1 OS=Mus musculus OX=10090 GN=Sdad1 PE=1 SV=1;tr|A0A0R4J0B7|A0A0R4J0B7_MOUSE Protein SDA1 OS=Mus musculus OX=10090 GN=Sdad1 PE=1 SV=1;sp|Q80UZ2|SDA1_MOUSE Protein SDA1 homolog OS=Mus musculus OX=10090 GN=Sdad1 PE=1	A0A0J9YV20	Sdad1	Protein SDA1	3	7	7	11.8	79.458	46101000	39779000	42126000	54702000	53507000	49929000	1.2354	0.0126631
sp|Q9QXA5|LSM4_MOUSE;tr|Q9CY46|Q9CY46_MOUSE;tr|D3YTP8|D3YTP8_MOUSE;tr|Q9D181|Q9D181_MOUSE;tr|A0A1B0GQZ9|A0A1B0GQZ9_MOUSE;tr|A0A1B0GRR9|A0A1B0GRR9_MOUSE	sp|Q9QXA5|LSM4_MOUSE;tr|Q9CY46|Q9CY46_MOUSE;tr|D3YTP8|D3YTP8_MOUSE;tr|Q9D181|Q9D181_MOUSE;tr|A0A1B0GQZ9|A0A1B0GQZ9_MOUSE;tr|A0A1B0GRR9|A0A1B0GRR9_MOUSE	sp|Q9QXA5|LSM4_MOUSE U6 snRNA-associated Sm-like protein LSm4 OS=Mus musculus OX=10090 GN=Lsm4 PE=1 SV=1;tr|Q9CY46|Q9CY46_MOUSE U6 snRNA-associated Sm-like protein LSm4 OS=Mus musculus OX=10090 GN=Lsm4 PE=1 SV=1;tr|D3YTP8|D3YTP8_MOUSE U6 snRNA-associated S	Q9QXA5	Lsm4	U6 snRNA-associated Sm-like protein LSm4	6	6	6	35.8	15.076	133940000	139110000	135390000	147280000	158200000	161330000	1.14291	0.0126798
sp|P62869|ELOB_MOUSE;tr|A0A3B2WBM3|A0A3B2WBM3_MOUSE;tr|Q9D7T5|Q9D7T5_MOUSE;tr|A6PWE0|A6PWE0_MOUSE	sp|P62869|ELOB_MOUSE;tr|A0A3B2WBM3|A0A3B2WBM3_MOUSE	sp|P62869|ELOB_MOUSE Elongin-B OS=Mus musculus OX=10090 GN=Elob PE=1 SV=1;tr|A0A3B2WBM3|A0A3B2WBM3_MOUSE Elongin-B OS=Mus musculus OX=10090 GN=Elob PE=1 SV=1	P62869	Elob Tceb2	Elongin-B (EloB) (Elongin 18 kDa subunit) (RNA polymerase II transcription factor SIII subunit B) (SIII p18) (Transcription elongation factor B polypeptide 2)	4	8	8	66.1	13.17	212660000	216620000	227260000	237340000	244090000	237620000	1.09521	0.012998
sp|O54946|DNJB6_MOUSE;tr|A0A0G2JER9|A0A0G2JER9_MOUSE;tr|Q9DAN5|Q9DAN5_MOUSE;tr|G3X8S5|G3X8S5_MOUSE;tr|A0A0G2JEI3|A0A0G2JEI3_MOUSE;tr|A0A0G2JGN9|A0A0G2JGN9_MOUSE;tr|F6YRQ2|F6YRQ2_MOUSE;tr|Q3MI10|Q3MI10_MOUSE;tr|Q3MI09|Q3MI09_MOUSE;sp|Q9QYI8|DNJB7_MOUSE;tr|A0A087WP03|A0A087WP03_MOUSE;sp|Q9QYI5|DNJB2_MOUSE	sp|O54946|DNJB6_MOUSE;tr|A0A0G2JER9|A0A0G2JER9_MOUSE;tr|Q9DAN5|Q9DAN5_MOUSE;tr|G3X8S5|G3X8S5_MOUSE;tr|A0A0G2JEI3|A0A0G2JEI3_MOUSE	sp|O54946|DNJB6_MOUSE DnaJ homolog subfamily B member 6 OS=Mus musculus OX=10090 GN=Dnajb6 PE=1 SV=4;tr|A0A0G2JER9|A0A0G2JER9_MOUSE DnaJ homolog subfamily B member 6 OS=Mus musculus OX=10090 GN=Dnajb6 PE=1 SV=1;tr|Q9DAN5|Q9DAN5_MOUSE Uncharacterized protei	O54946	Dnajb6 Hsj2 Mrj	DnaJ homolog subfamily B member 6 (Heat shock protein J2) (HSJ-2) (MRJ) (mDj4)	12	6	6	20.5	39.807	105950000	99632000	100790000	85645000	86391000	93604000	0.867051	0.0131711
tr|Q3ULU3|Q3ULU3_MOUSE;sp|O35855|BCAT2_MOUSE;tr|O88374|O88374_MOUSE;tr|A0A1B0GX27|A0A1B0GX27_MOUSE;tr|Q8CAX1|Q8CAX1_MOUSE;tr|A0A1B0GST1|A0A1B0GST1_MOUSE;tr|A0A1B0GQY4|A0A1B0GQY4_MOUSE	tr|Q3ULU3|Q3ULU3_MOUSE;sp|O35855|BCAT2_MOUSE;tr|O88374|O88374_MOUSE;tr|A0A1B0GX27|A0A1B0GX27_MOUSE;tr|Q8CAX1|Q8CAX1_MOUSE	tr|Q3ULU3|Q3ULU3_MOUSE Branched-chain-amino-acid aminotransferase OS=Mus musculus OX=10090 GN=Bcat2 PE=1 SV=1;sp|O35855|BCAT2_MOUSE Branched-chain-amino-acid aminotransferase, mitochondrial OS=Mus musculus OX=10090 GN=Bcat2 PE=1 SV=2;tr|O88374|O88374_MOUSE	Q3ULU3	Bcat2	Branched-chain-amino-acid aminotransferase (EC 2.6.1.42)	7	9	9	29.5	44.127	204010000	197980000	159340000	126830000	117860000	90392000	0.596943	0.0132353
tr|G5E866|G5E866_MOUSE;sp|Q99NB9|SF3B1_MOUSE;tr|Q3US00|Q3US00_MOUSE;tr|A0JLN0|A0JLN0_MOUSE;tr|Q3UIB4|Q3UIB4_MOUSE;tr|A0A087WNS2|A0A087WNS2_MOUSE;tr|Q3TB51|Q3TB51_MOUSE;tr|Q8C839|Q8C839_MOUSE;tr|Q8C2Y9|Q8C2Y9_MOUSE	tr|G5E866|G5E866_MOUSE;sp|Q99NB9|SF3B1_MOUSE;tr|Q3US00|Q3US00_MOUSE;tr|A0JLN0|A0JLN0_MOUSE	tr|G5E866|G5E866_MOUSE Splicing factor 3B subunit 1 OS=Mus musculus OX=10090 GN=Sf3b1 PE=1 SV=1;sp|Q99NB9|SF3B1_MOUSE Splicing factor 3B subunit 1 OS=Mus musculus OX=10090 GN=Sf3b1 PE=1 SV=1;tr|Q3US00|Q3US00_MOUSE Uncharacterized protein (Fragment) OS=Mus	G5E866	Sf3b1 mCG_117542	Splicing factor 3B subunit 1 (Splicing factor 3b, subunit 1)	9	63	63	59.6	145.83	3373300000	3301300000	3540200000	3708000000	3702900000	3704500000	1.08817	0.013244
sp|Q148V8|FA83H_MOUSE	sp|Q148V8|FA83H_MOUSE	sp|Q148V8|FA83H_MOUSE Protein FAM83H OS=Mus musculus OX=10090 GN=Fam83h PE=1 SV=1	Q148V8	Fam83h	Protein FAM83H	1	12	12	17.4	131.11	59556000	57129000	54056000	50193000	47957000	45016000	0.838498	0.0136484
sp|Q8BGK6|YLAT2_MOUSE;tr|A0A1D5RMA4|A0A1D5RMA4_MOUSE;tr|A0A1D5RMI7|A0A1D5RMI7_MOUSE;tr|A0A1D5RM43|A0A1D5RM43_MOUSE;tr|A0A1D5RLG1|A0A1D5RLG1_MOUSE	sp|Q8BGK6|YLAT2_MOUSE	sp|Q8BGK6|YLAT2_MOUSE Y+L amino acid transporter 2 OS=Mus musculus OX=10090 GN=Slc7a6 PE=1 SV=1	Q8BGK6	Slc7a6 Kiaa0245	Y+L amino acid transporter 2 (Solute carrier family 7 member 6) (y(+)L-type amino acid transporter 2) (Y+LAT2) (y+LAT-2)	5	5	4	11.7	56.77	54686000	45522000	49993000	38181000	38320000	39746000	0.773943	0.0136575
sp|Q922U1|PRPF3_MOUSE;tr|Q3UT19|Q3UT19_MOUSE;tr|E0CYD0|E0CYD0_MOUSE;tr|F6T4V0|F6T4V0_MOUSE	sp|Q922U1|PRPF3_MOUSE;tr|Q3UT19|Q3UT19_MOUSE	sp|Q922U1|PRPF3_MOUSE U4/U6 small nuclear ribonucleoprotein Prp3 OS=Mus musculus OX=10090 GN=Prpf3 PE=1 SV=1;tr|Q3UT19|Q3UT19_MOUSE Uncharacterized protein OS=Mus musculus OX=10090 GN=Prpf3 PE=2 SV=1	Q922U1	Prpf3	U4/U6 small nuclear ribonucleoprotein Prp3 (Pre-mRNA-splicing factor 3)	4	25	25	43.9	77.454	253380000	226450000	266450000	295040000	303010000	299080000	1.20214	0.0137975
tr|Q5EAT0|Q5EAT0_MOUSE;tr|Q3UIK3|Q3UIK3_MOUSE;sp|P49962|SRP09_MOUSE;tr|D3YZX8|D3YZX8_MOUSE	tr|Q5EAT0|Q5EAT0_MOUSE;tr|Q3UIK3|Q3UIK3_MOUSE;sp|P49962|SRP09_MOUSE;tr|D3YZX8|D3YZX8_MOUSE	tr|Q5EAT0|Q5EAT0_MOUSE Signal recognition particle 9 kDa protein OS=Mus musculus OX=10090 GN=Srp9 PE=1 SV=1;tr|Q3UIK3|Q3UIK3_MOUSE Signal recognition particle 9 kDa protein OS=Mus musculus OX=10090 GN=Srp9 PE=2 SV=1;sp|P49962|SRP09_MOUSE Signal recognition	Q5EAT0	Srp9 mCG_4718	Signal recognition particle 9 kDa protein (SRP9)	4	5	5	53.5	10.194	121310000	128610000	132890000	144530000	141350000	150090000	1.13887	0.0138921
tr|B2RQV1|B2RQV1_MOUSE;sp|Q8BWZ3|NAA25_MOUSE;tr|Q8BKH5|Q8BKH5_MOUSE;tr|Q8BY54|Q8BY54_MOUSE;tr|Q8BKI9|Q8BKI9_MOUSE;tr|F6XQZ4|F6XQZ4_MOUSE;tr|G3UZ51|G3UZ51_MOUSE;tr|G3UZX9|G3UZX9_MOUSE	tr|B2RQV1|B2RQV1_MOUSE;sp|Q8BWZ3|NAA25_MOUSE	tr|B2RQV1|B2RQV1_MOUSE RIKEN cDNA C330023M02, isoform CRA_a OS=Mus musculus OX=10090 GN=Naa25 PE=2 SV=1;sp|Q8BWZ3|NAA25_MOUSE N-alpha-acetyltransferase 25, NatB auxiliary subunit OS=Mus musculus OX=10090 GN=Naa25 PE=1 SV=1	B2RQV1	Naa25 C330023M02Rik mCG_142191	RIKEN cDNA C330023M02, isoform CRA_a	8	25	25	35.8	111.71	150290000	149050000	163990000	122300000	135920000	126810000	0.831006	0.0139012
sp|Q9JKF1|IQGA1_MOUSE;tr|Q80UW7|Q80UW7_MOUSE;tr|Q6ZQK2|Q6ZQK2_MOUSE;tr|Q8CGH5|Q8CGH5_MOUSE;tr|Q05CQ4|Q05CQ4_MOUSE;tr|Q3TU98|Q3TU98_MOUSE;tr|Q8CDT3|Q8CDT3_MOUSE;tr|Q3TPD2|Q3TPD2_MOUSE;tr|Q3TR56|Q3TR56_MOUSE;tr|Q8BPA6|Q8BPA6_MOUSE;tr|Q8CDW9|Q8CDW9_MOUSE;tr|Q9D408|Q9D408_MOUSE;tr|A0A0U1RNG5|A0A0U1RNG5_MOUSE;tr|A0A0U1RPU3|A0A0U1RPU3_MOUSE;tr|Q8CC64|Q8CC64_MOUSE;tr|Q8BV47|Q8BV47_MOUSE	sp|Q9JKF1|IQGA1_MOUSE;tr|Q80UW7|Q80UW7_MOUSE;tr|Q6ZQK2|Q6ZQK2_MOUSE;tr|Q8CGH5|Q8CGH5_MOUSE;tr|Q05CQ4|Q05CQ4_MOUSE	sp|Q9JKF1|IQGA1_MOUSE Ras GTPase-activating-like protein IQGAP1 OS=Mus musculus OX=10090 GN=Iqgap1 PE=1 SV=2;tr|Q80UW7|Q80UW7_MOUSE IQ motif containing GTPase activating protein 1 OS=Mus musculus OX=10090 GN=Iqgap1 PE=2 SV=1;tr|Q6ZQK2|Q6ZQK2_MOUSE MKIAA005	Q9JKF1	Iqgap1	Ras GTPase-activating-like protein IQGAP1	16	57	56	46	188.74	977140000	1007200000	1040700000	932740000	907850000	932230000	0.916623	0.0139123
sp|Q9DC71|RT15_MOUSE	sp|Q9DC71|RT15_MOUSE	sp|Q9DC71|RT15_MOUSE 28S ribosomal protein S15, mitochondrial OS=Mus musculus OX=10090 GN=Mrps15 PE=1 SV=2	Q9DC71	Mrps15 Rpms15	28S ribosomal protein S15, mitochondrial (MRP-S15) (S15mt)	1	11	11	39.5	29.463	222830000	221560000	207870000	184860000	174010000	195440000	0.84983	0.0139937
tr|Q3UBP6|Q3UBP6_MOUSE;tr|Q3UBQ4|Q3UBQ4_MOUSE	tr|Q3UBP6|Q3UBP6_MOUSE;tr|Q3UBQ4|Q3UBQ4_MOUSE	tr|Q3UBP6|Q3UBP6_MOUSE Uncharacterized protein OS=Mus musculus OX=10090 GN=Actb PE=2 SV=1;tr|Q3UBQ4|Q3UBQ4_MOUSE Uncharacterized protein OS=Mus musculus OX=10090 GN=Actb PE=2 SV=1	Q3UBP6	Actb	Uncharacterized protein	2	22	0	64	41.768	3365600000	3298000000	3204000000	2889000000	2989100000	3081900000	0.908022	0.0141861
tr|Q5SW83|Q5SW83_MOUSE;sp|P61161|ARP2_MOUSE;tr|Q8BMA4|Q8BMA4_MOUSE	tr|Q5SW83|Q5SW83_MOUSE;sp|P61161|ARP2_MOUSE;tr|Q8BMA4|Q8BMA4_MOUSE	tr|Q5SW83|Q5SW83_MOUSE Actin-related protein 2 OS=Mus musculus OX=10090 GN=Actr2 PE=1 SV=1;sp|P61161|ARP2_MOUSE Actin-related protein 2 OS=Mus musculus OX=10090 GN=Actr2 PE=1 SV=1;tr|Q8BMA4|Q8BMA4_MOUSE Actin-related protein 2 OS=Mus musculus OX=10090 PE=2	Q5SW83	Actr2 mCG_122263	Actin-related protein 2	3	13	13	38.6	44.76	676460000	657220000	701860000	599820000	572400000	622170000	0.88153	0.014201
sp|Q6QD59|SEC20_MOUSE;tr|B8JJI4|B8JJI4_MOUSE;tr|F7C279|F7C279_MOUSE	sp|Q6QD59|SEC20_MOUSE;tr|B8JJI4|B8JJI4_MOUSE;tr|F7C279|F7C279_MOUSE	sp|Q6QD59|SEC20_MOUSE Vesicle transport protein SEC20 OS=Mus musculus OX=10090 GN=Bnip1 PE=1 SV=1;tr|B8JJI4|B8JJI4_MOUSE Vesicle transport protein SEC20 OS=Mus musculus OX=10090 GN=Bnip1 PE=1 SV=1;tr|F7C279|F7C279_MOUSE Vesicle transport protein SEC20 (Fra	Q6QD59	Bnip1 Sec20 Sec20l	Vesicle transport protein SEC20	3	10	10	52.2	26.175	113620000	115720000	118690000	110650000	108600000	108390000	0.941413	0.0142652
tr|Q3U6V5|Q3U6V5_MOUSE;tr|Q3TL10|Q3TL10_MOUSE;tr|Q3TF02|Q3TF02_MOUSE;tr|Q3TDF8|Q3TDF8_MOUSE;sp|Q8BWY3|ERF1_MOUSE;tr|P70199|P70199_MOUSE	tr|Q3U6V5|Q3U6V5_MOUSE;tr|Q3TL10|Q3TL10_MOUSE;tr|Q3TF02|Q3TF02_MOUSE;tr|Q3TDF8|Q3TDF8_MOUSE;sp|Q8BWY3|ERF1_MOUSE;tr|P70199|P70199_MOUSE	tr|Q3U6V5|Q3U6V5_MOUSE Uncharacterized protein OS=Mus musculus OX=10090 GN=Etf1 PE=2 SV=1;tr|Q3TL10|Q3TL10_MOUSE Uncharacterized protein OS=Mus musculus OX=10090 GN=Etf1 PE=2 SV=1;tr|Q3TF02|Q3TF02_MOUSE Uncharacterized protein OS=Mus musculus OX=10090 GN=E	Q3U6V5	Etf1	eRF1_1 domain-containing protein	6	15	15	54.3	43.571	273510000	242030000	302490000	354460000	359360000	336720000	1.28423	0.0144887
sp|E9Q784|ZC3HD_MOUSE;tr|A0A2I3BPQ5|A0A2I3BPQ5_MOUSE;tr|Q8CIK5|Q8CIK5_MOUSE;tr|Q9CT50|Q9CT50_MOUSE;tr|Q8BHW0|Q8BHW0_MOUSE;tr|Q9CXN5|Q9CXN5_MOUSE	sp|E9Q784|ZC3HD_MOUSE;tr|A0A2I3BPQ5|A0A2I3BPQ5_MOUSE	sp|E9Q784|ZC3HD_MOUSE Zinc finger CCCH domain-containing protein 13 OS=Mus musculus OX=10090 GN=Zc3h13 PE=1 SV=1;tr|A0A2I3BPQ5|A0A2I3BPQ5_MOUSE Zinc finger CCCH domain-containing protein 13 OS=Mus musculus OX=10090 GN=Zc3h13 PE=1 SV=1	E9Q784	Zc3h13	Zinc finger CCCH domain-containing protein 13	6	14	14	9.9	203.75	98918000	89499000	79966000	65481000	67618000	67062000	0.745804	0.0145126
sp|Q7TMY8|HUWE1_MOUSE;tr|Q4JG03|Q4JG03_MOUSE;tr|A2AFQ0|A2AFQ0_MOUSE;tr|F6XP90|F6XP90_MOUSE;tr|Q8BKX3|Q8BKX3_MOUSE	sp|Q7TMY8|HUWE1_MOUSE;tr|Q4JG03|Q4JG03_MOUSE;tr|A2AFQ0|A2AFQ0_MOUSE	sp|Q7TMY8|HUWE1_MOUSE E3 ubiquitin-protein ligase HUWE1 OS=Mus musculus OX=10090 GN=Huwe1 PE=1 SV=5;tr|Q4JG03|Q4JG03_MOUSE Mcl-1 ubiquitin ligase OS=Mus musculus OX=10090 GN=Huwe1 PE=2 SV=1;tr|A2AFQ0|A2AFQ0_MOUSE E3 ubiquitin-protein ligase HUWE1 OS=Mus mu	Q7TMY8	Huwe1 Kiaa0312 Ureb1	E3 ubiquitin-protein ligase HUWE1 (EC 2.3.2.26) (E3Histone) (HECT, UBA and WWE domain-containing protein 1) (HECT-type E3 ubiquitin transferase HUWE1) (Upstream regulatory element-binding protein 1) (URE-B1) (URE-binding protein 1)	5	6	6	2.2	482.63	288450000	253750000	179180000	51665000	71756000	123080000	0.341708	0.0148643
sp|Q3UA06|PCH2_MOUSE	sp|Q3UA06|PCH2_MOUSE	sp|Q3UA06|PCH2_MOUSE Pachytene checkpoint protein 2 homolog OS=Mus musculus OX=10090 GN=Trip13 PE=1 SV=1	Q3UA06	Trip13 Pch2	Pachytene checkpoint protein 2 homolog (Thyroid hormone receptor interactor 13) (Thyroid receptor-interacting protein 13) (TR-interacting protein 13) (TRIP-13)	1	12	12	31.9	48.376	92257000	120150000	130840000	157980000	166710000	163360000	1.42186	0.0148793
sp|Q62470|ITA3_MOUSE;tr|F6UD16|F6UD16_MOUSE;tr|Q8C8X8|Q8C8X8_MOUSE;tr|Q8K4Q3|Q8K4Q3_MOUSE	sp|Q62470|ITA3_MOUSE	sp|Q62470|ITA3_MOUSE Integrin alpha-3 OS=Mus musculus OX=10090 GN=Itga3 PE=1 SV=1	Q62470	Itga3	Integrin alpha-3 (CD49 antigen-like family member C) (Galactoprotein B3) (GAPB3) (VLA-3 subunit alpha) (CD antigen CD49c) [Cleaved into: Integrin alpha-3 heavy chain; Integrin alpha-3 light chain]	4	31	31	39.4	116.74	3465200000	3647200000	3399100000	3065900000	3233900000	3041400000	0.888665	0.0151561
sp|Q9DC70|NDUS7_MOUSE	sp|Q9DC70|NDUS7_MOUSE	sp|Q9DC70|NDUS7_MOUSE NADH dehydrogenase [ubiquinone] iron-sulfur protein 7, mitochondrial OS=Mus musculus OX=10090 GN=Ndufs7 PE=1 SV=1	Q9DC70	Ndufs7	NADH dehydrogenase [ubiquinone] iron-sulfur protein 7, mitochondrial (EC 1.6.99.3) (EC 7.1.1.2) (Complex I-20kD) (CI-20kD) (NADH-ubiquinone oxidoreductase 20 kDa subunit)	1	8	8	34.8	24.683	117420000	108060000	113090000	133560000	125400000	125830000	1.13652	0.015248
sp|P57759|ERP29_MOUSE;tr|A8C1V9|A8C1V9_MOUSE;tr|F8WJI4|F8WJI4_MOUSE;tr|F8WIM7|F8WIM7_MOUSE;tr|D6RG87|D6RG87_MOUSE	sp|P57759|ERP29_MOUSE	sp|P57759|ERP29_MOUSE Endoplasmic reticulum resident protein 29 OS=Mus musculus OX=10090 GN=Erp29 PE=1 SV=2	P57759	Erp29	Endoplasmic reticulum resident protein 29 (ERp29)	5	9	9	47.7	28.823	391730000	392360000	400520000	366170000	365700000	339370000	0.904298	0.0152914
tr|Q9CXY0|Q9CXY0_MOUSE;sp|P63321|RALA_MOUSE;tr|A0A1Y7VL93|A0A1Y7VL93_MOUSE	tr|Q9CXY0|Q9CXY0_MOUSE;sp|P63321|RALA_MOUSE;tr|A0A1Y7VL93|A0A1Y7VL93_MOUSE	tr|Q9CXY0|Q9CXY0_MOUSE Uncharacterized protein OS=Mus musculus OX=10090 GN=Rala PE=2 SV=1;sp|P63321|RALA_MOUSE Ras-related protein Ral-A OS=Mus musculus OX=10090 GN=Rala PE=1 SV=1;tr|A0A1Y7VL93|A0A1Y7VL93_MOUSE Ras-related protein Ral-A (Fragment) OS=Mus m	Q9CXY0	Rala	Uncharacterized protein	3	7	4	40.8	23.596	236070000	220960000	214320000	197040000	183510000	170950000	0.821479	0.0157053
sp|A2A6Q5|CDC27_MOUSE;tr|Q3TTW1|Q3TTW1_MOUSE;tr|Q3UYS3|Q3UYS3_MOUSE;tr|Q8BYJ1|Q8BYJ1_MOUSE;tr|Q8R568|Q8R568_MOUSE	sp|A2A6Q5|CDC27_MOUSE;tr|Q3TTW1|Q3TTW1_MOUSE	sp|A2A6Q5|CDC27_MOUSE Cell division cycle protein 27 homolog OS=Mus musculus OX=10090 GN=Cdc27 PE=1 SV=1;tr|Q3TTW1|Q3TTW1_MOUSE Uncharacterized protein (Fragment) OS=Mus musculus OX=10090 GN=Cdc27 PE=2 SV=1	A2A6Q5	Cdc27	Cell division cycle protein 27 homolog	5	8	8	15.4	91.841	43957000	38970000	35985000	55328000	48568000	57164000	1.35445	0.0159174
sp|Q61733|RT31_MOUSE	sp|Q61733|RT31_MOUSE	sp|Q61733|RT31_MOUSE 28S ribosomal protein S31, mitochondrial OS=Mus musculus OX=10090 GN=Mrps31 PE=1 SV=1	Q61733	Mrps31 Imogn38	28S ribosomal protein S31, mitochondrial (MRP-S31) (S31mt) (Imogen 38)	1	14	14	50	43.88	212900000	190490000	192150000	170070000	170880000	165130000	0.849783	0.0159497
tr|A0A0R4J0L6|A0A0R4J0L6_MOUSE;sp|Q8BJZ4|RT35_MOUSE;tr|A0A0N4SV23|A0A0N4SV23_MOUSE	tr|A0A0R4J0L6|A0A0R4J0L6_MOUSE;sp|Q8BJZ4|RT35_MOUSE	tr|A0A0R4J0L6|A0A0R4J0L6_MOUSE 28S ribosomal protein S35, mitochondrial OS=Mus musculus OX=10090 GN=Mrps35 PE=1 SV=1;sp|Q8BJZ4|RT35_MOUSE 28S ribosomal protein S35, mitochondrial OS=Mus musculus OX=10090 GN=Mrps35 PE=1 SV=2	A0A0R4J0L6	Mrps35	28S ribosomal protein S35, mitochondrial	3	10	10	48.4	35.917	224110000	225250000	228230000	251690000	256780000	238050000	1.10173	0.01595
sp|Q8BQZ5|CPSF4_MOUSE;tr|B2LVG5|B2LVG5_MOUSE;tr|B2LVG6|B2LVG6_MOUSE;tr|E0CXT7|E0CXT7_MOUSE;tr|M0QWM8|M0QWM8_MOUSE;tr|F7B6Z5|F7B6Z5_MOUSE	sp|Q8BQZ5|CPSF4_MOUSE;tr|B2LVG5|B2LVG5_MOUSE;tr|B2LVG6|B2LVG6_MOUSE;tr|E0CXT7|E0CXT7_MOUSE	sp|Q8BQZ5|CPSF4_MOUSE Cleavage and polyadenylation specificity factor subunit 4 OS=Mus musculus OX=10090 GN=Cpsf4 PE=2 SV=1;tr|B2LVG5|B2LVG5_MOUSE Cleavage and polyadenylation specific factor 4 isoform 1 OS=Mus musculus OX=10090 GN=Cpsf4 PE=1 SV=1;tr|B2LVG	Q8BQZ5	Cpsf4 Cpsf30	Cleavage and polyadenylation specificity factor subunit 4 (Cleavage and polyadenylation specificity factor 30 kDa subunit) (CPSF 30 kDa subunit) (Clipper homolog) (Clipper/CPSF 30K)	6	6	6	35.5	23.653	58145000	56126000	61842000	68235000	70189000	64952000	1.1548	0.0159946
tr|Q5NC81|Q5NC81_MOUSE;sp|P15532|NDKA_MOUSE;tr|Q5NC80|Q5NC80_MOUSE;tr|Q5NC79|Q5NC79_MOUSE	tr|Q5NC81|Q5NC81_MOUSE;sp|P15532|NDKA_MOUSE;tr|Q5NC80|Q5NC80_MOUSE	tr|Q5NC81|Q5NC81_MOUSE Nucleoside diphosphate kinase OS=Mus musculus OX=10090 GN=Nme1 PE=1 SV=1;sp|P15532|NDKA_MOUSE Nucleoside diphosphate kinase A OS=Mus musculus OX=10090 GN=Nme1 PE=1 SV=1;tr|Q5NC80|Q5NC80_MOUSE Nucleoside diphosphate kinase (Fragment)	Q5NC81	Nme1	Nucleoside diphosphate kinase (EC 2.7.4.6)	4	14	4	86.2	17.208	344850000	344970000	394310000	238570000	293200000	275510000	0.744634	0.0160236
tr|Q545I6|Q545I6_MOUSE;sp|Q9WUU7|CATZ_MOUSE;tr|Q9ES94|Q9ES94_MOUSE	tr|Q545I6|Q545I6_MOUSE;sp|Q9WUU7|CATZ_MOUSE;tr|Q9ES94|Q9ES94_MOUSE	tr|Q545I6|Q545I6_MOUSE Cathepsin Z, isoform CRA_b OS=Mus musculus OX=10090 GN=Ctsz PE=1 SV=1;sp|Q9WUU7|CATZ_MOUSE Cathepsin Z OS=Mus musculus OX=10090 GN=Ctsz PE=1 SV=1;tr|Q9ES94|Q9ES94_MOUSE Cathepsin Z OS=Mus musculus OX=10090 GN=Ctsz PE=2 SV=1	Q545I6	Ctsz mCG_9962	Cathepsin Z, isoform CRA_b	3	10	10	49.3	33.996	634190000	612140000	663760000	742660000	707860000	699330000	1.12552	0.0161334
tr|Q545S6|Q545S6_MOUSE;sp|P60003|ELOF1_MOUSE	tr|Q545S6|Q545S6_MOUSE;sp|P60003|ELOF1_MOUSE	tr|Q545S6|Q545S6_MOUSE Transcription elongation factor 1 homolog OS=Mus musculus OX=10090 GN=Elof1 PE=2 SV=1;sp|P60003|ELOF1_MOUSE Transcription elongation factor 1 homolog OS=Mus musculus OX=10090 GN=Elof1 PE=1 SV=1	Q545S6	Elof1 mCG_22839	Transcription elongation factor 1 homolog	2	1	1	21.7	9.4618	29142000	24923000	NaN	40219000	45556000	48956000	1.66135	0.0161609
tr|Q52L50|Q52L50_MOUSE;sp|Q99JI6|RAP1B_MOUSE;tr|A0A1W2P777|A0A1W2P777_MOUSE	tr|Q52L50|Q52L50_MOUSE;sp|Q99JI6|RAP1B_MOUSE	tr|Q52L50|Q52L50_MOUSE RAS related protein 1b OS=Mus musculus OX=10090 GN=Rap1b PE=1 SV=1;sp|Q99JI6|RAP1B_MOUSE Ras-related protein Rap-1b OS=Mus musculus OX=10090 GN=Rap1b PE=1 SV=2	Q52L50	Rap1b mCG_3219	RAS related protein 1b (RAS related protein 1b, isoform CRA_a)	3	16	7	71.2	20.825	1432900000	1446700000	1424900000	1402500000	1366500000	1360200000	0.959275	0.0162238
tr|Q06EZ3|Q06EZ3_MOUSE;sp|Q61263|SOAT1_MOUSE;tr|A0A087WNN8|A0A087WNN8_MOUSE;tr|Q8C795|Q8C795_MOUSE;tr|A0A087WSJ5|A0A087WSJ5_MOUSE	tr|Q06EZ3|Q06EZ3_MOUSE;sp|Q61263|SOAT1_MOUSE	tr|Q06EZ3|Q06EZ3_MOUSE O-acyltransferase OS=Mus musculus OX=10090 GN=Soat1 PE=2 SV=1;sp|Q61263|SOAT1_MOUSE Sterol O-acyltransferase 1 OS=Mus musculus OX=10090 GN=Soat1 PE=1 SV=2	Q06EZ3	Soat1 soat1	O-acyltransferase	5	10	10	20.6	63.81	872250000	858900000	835260000	743360000	745510000	639410000	0.829283	0.0163295
sp|Q9ERE7|MESD_MOUSE;tr|D3YVR4|D3YVR4_MOUSE	sp|Q9ERE7|MESD_MOUSE;tr|D3YVR4|D3YVR4_MOUSE	sp|Q9ERE7|MESD_MOUSE LRP chaperone MESD OS=Mus musculus OX=10090 GN=Mesd PE=1 SV=1;tr|D3YVR4|D3YVR4_MOUSE LRP chaperone MESD (Fragment) OS=Mus musculus OX=10090 GN=Mesd PE=1 SV=1	Q9ERE7	Mesd Mesdc2	LRP chaperone MESD (LDLR chaperone MESD) (Mesoderm development candidate 2) (Mesoderm development protein)	2	8	8	51.8	25.206	254270000	225990000	238100000	278500000	273590000	269200000	1.14328	0.0164028
tr|E9QPX1|E9QPX1_MOUSE;sp|P39061|COIA1_MOUSE;tr|A0A1W2P6N8|A0A1W2P6N8_MOUSE	tr|E9QPX1|E9QPX1_MOUSE;sp|P39061|COIA1_MOUSE	tr|E9QPX1|E9QPX1_MOUSE Collagen alpha-1(XVIII) chain OS=Mus musculus OX=10090 GN=Col18a1 PE=1 SV=1;sp|P39061|COIA1_MOUSE Collagen alpha-1(XVIII) chain OS=Mus musculus OX=10090 GN=Col18a1 PE=1 SV=4	E9QPX1	Col18a1	Collagen alpha-1(XVIII) chain	3	7	7	6.2	182.29	125090000	149320000	133850000	92698000	100310000	110590000	0.743639	0.0164767
sp|Q9EPU4|CPSF1_MOUSE;tr|A0A2R8VK76|A0A2R8VK76_MOUSE;tr|Q3U1X8|Q3U1X8_MOUSE;tr|A0A2R8VI46|A0A2R8VI46_MOUSE;tr|A0A2R8VK03|A0A2R8VK03_MOUSE	sp|Q9EPU4|CPSF1_MOUSE;tr|A0A2R8VK76|A0A2R8VK76_MOUSE	sp|Q9EPU4|CPSF1_MOUSE Cleavage and polyadenylation specificity factor subunit 1 OS=Mus musculus OX=10090 GN=Cpsf1 PE=1 SV=1;tr|A0A2R8VK76|A0A2R8VK76_MOUSE Cleavage and polyadenylation-specificity factor subunit 1 OS=Mus musculus OX=10090 GN=Cpsf1 PE=1 SV=1	Q9EPU4	Cpsf1 Cpsf160	Cleavage and polyadenylation specificity factor subunit 1 (Cleavage and polyadenylation specificity factor 160 kDa subunit) (CPSF 160 kDa subunit)	5	23	23	22.6	160.82	191650000	193480000	198630000	225840000	207480000	218930000	1.11733	0.0165053
tr|Q6NTH7|Q6NTH7_MOUSE;tr|Q8BQK4|Q8BQK4_MOUSE;sp|P10417|BCL2_MOUSE	tr|Q6NTH7|Q6NTH7_MOUSE;tr|Q8BQK4|Q8BQK4_MOUSE;sp|P10417|BCL2_MOUSE	tr|Q6NTH7|Q6NTH7_MOUSE B-cell leukemia/lymphoma 2 OS=Mus musculus OX=10090 GN=Bcl2 PE=2 SV=1;tr|Q8BQK4|Q8BQK4_MOUSE Uncharacterized protein OS=Mus musculus OX=10090 GN=Bcl2 PE=2 SV=1;sp|P10417|BCL2_MOUSE Apoptosis regulator Bcl-2 OS=Mus musculus OX=10090 G	Q6NTH7	Bcl2 mCG_128637	B-cell leukemia/lymphoma 2 (B-cell leukemia/lymphoma 2, isoform CRA_a)	3	2	2	23.6	22.281	21064000	NaN	23956000	17309000	15714000	16542000	0.73397	0.016589
sp|Q9DBS1|TMM43_MOUSE	sp|Q9DBS1|TMM43_MOUSE	sp|Q9DBS1|TMM43_MOUSE Transmembrane protein 43 OS=Mus musculus OX=10090 GN=Tmem43 PE=1 SV=1	Q9DBS1	Tmem43	Transmembrane protein 43 (Protein LUMA)	1	17	17	55.2	44.783	375090000	382240000	355250000	319100000	341370000	314410000	0.876234	0.0166744
tr|Z4YJZ7|Z4YJZ7_MOUSE;tr|A0A0H2UH19|A0A0H2UH19_MOUSE;sp|Q5DW34|EHMT1_MOUSE;tr|H7CHP8|H7CHP8_MOUSE;tr|E9Q5A3|E9Q5A3_MOUSE;tr|Q8BHB2|Q8BHB2_MOUSE;tr|Q3UF17|Q3UF17_MOUSE;tr|Q6ZPG6|Q6ZPG6_MOUSE;tr|A0A0A6YWA0|A0A0A6YWA0_MOUSE;tr|A0A0G2JFI9|A0A0G2JFI9_MOUSE;tr|A2AIS5|A2AIS5_MOUSE;tr|A0A140LII4|A0A140LII4_MOUSE;tr|Q8C358|Q8C358_MOUSE;tr|Q8C3T0|Q8C3T0_MOUSE;tr|A0A1B0GXE2|A0A1B0GXE2_MOUSE;tr|Q8BRN2|Q8BRN…	tr|Z4YJZ7|Z4YJZ7_MOUSE;tr|A0A0H2UH19|A0A0H2UH19_MOUSE;sp|Q5DW34|EHMT1_MOUSE;tr|H7CHP8|H7CHP8_MOUSE;tr|E9Q5A3|E9Q5A3_MOUSE;tr|Q8BHB2|Q8BHB2_MOUSE	tr|Z4YJZ7|Z4YJZ7_MOUSE Histone-lysine N-methyltransferase EHMT1 OS=Mus musculus OX=10090 GN=Ehmt1 PE=1 SV=2;tr|A0A0H2UH19|A0A0H2UH19_MOUSE Histone-lysine N-methyltransferase EHMT1 OS=Mus musculus OX=10090 GN=Ehmt1 PE=1 SV=1;sp|Q5DW34|EHMT1_MOUSE Histone-ly	Z4YJZ7	Ehmt1	Histone-lysine N-methyltransferase EHMT1	17	20	19	23.4	141.13	176780000	169000000	161940000	148170000	143550000	128090000	0.826853	0.0169173
sp|Q8K2B3|SDHA_MOUSE;tr|A0A1Y7VJ55|A0A1Y7VJ55_MOUSE;tr|Q6IWE1|Q6IWE1_MOUSE	sp|Q8K2B3|SDHA_MOUSE	sp|Q8K2B3|SDHA_MOUSE Succinate dehydrogenase [ubiquinone] flavoprotein subunit, mitochondrial OS=Mus musculus OX=10090 GN=Sdha PE=1 SV=1	Q8K2B3	Sdha	Succinate dehydrogenase [ubiquinone] flavoprotein subunit, mitochondrial (EC 1.3.5.1) (Flavoprotein subunit of complex II) (Fp)	3	34	34	69.1	72.585	3750300000	3707200000	3692000000	3455800000	3428200000	3168600000	0.901619	0.0171613
sp|Q9CXS4|CENPV_MOUSE;tr|F6SS03|F6SS03_MOUSE	sp|Q9CXS4|CENPV_MOUSE	sp|Q9CXS4|CENPV_MOUSE Centromere protein V OS=Mus musculus OX=10090 GN=Cenpv PE=1 SV=2	Q9CXS4	Cenpv Prr6	Centromere protein V (CENP-V) (Proline-rich protein 6)	2	9	9	53.2	27.541	415900000	401100000	417080000	372920000	383720000	351880000	0.898256	0.0172058
sp|Q8BQ47|CNPY4_MOUSE;tr|D3Z0T5|D3Z0T5_MOUSE	sp|Q8BQ47|CNPY4_MOUSE;tr|D3Z0T5|D3Z0T5_MOUSE	sp|Q8BQ47|CNPY4_MOUSE Protein canopy homolog 4 OS=Mus musculus OX=10090 GN=Cnpy4 PE=1 SV=1;tr|D3Z0T5|D3Z0T5_MOUSE Protein canopy homolog 4 (Fragment) OS=Mus musculus OX=10090 GN=Cnpy4 PE=1 SV=1	Q8BQ47	Cnpy4 Prat4b	Protein canopy homolog 4 (Protein associated with Tlr4)	2	5	5	24.9	28.093	76903000	69155000	70283000	86219000	82389000	81187000	1.15464	0.0174237
sp|Q9JIK5|DDX21_MOUSE;tr|Q3ULC7|Q3ULC7_MOUSE;tr|Q9CWZ5|Q9CWZ5_MOUSE;tr|Q6PCP0|Q6PCP0_MOUSE;tr|Q8K2L4|Q8K2L4_MOUSE;tr|Q9CSR3|Q9CSR3_MOUSE	sp|Q9JIK5|DDX21_MOUSE;tr|Q3ULC7|Q3ULC7_MOUSE;tr|Q9CWZ5|Q9CWZ5_MOUSE;tr|Q6PCP0|Q6PCP0_MOUSE;tr|Q8K2L4|Q8K2L4_MOUSE	sp|Q9JIK5|DDX21_MOUSE Nucleolar RNA helicase 2 OS=Mus musculus OX=10090 GN=Ddx21 PE=1 SV=3;tr|Q3ULC7|Q3ULC7_MOUSE Uncharacterized protein OS=Mus musculus OX=10090 GN=Ddx21 PE=2 SV=1;tr|Q9CWZ5|Q9CWZ5_MOUSE Uncharacterized protein OS=Mus musculus OX=10090 GN	Q9JIK5	Ddx21	Nucleolar RNA helicase 2 (EC 3.6.4.13) (DEAD box protein 21) (Gu-alpha) (Nucleolar RNA helicase Gu) (Nucleolar RNA helicase II) (RH II/Gu)	6	54	54	64.3	93.55	4479700000	4595300000	4631100000	5144800000	4807000000	5031500000	1.09318	0.0175978
tr|I7HLV2|I7HLV2_MOUSE;tr|Q3THJ6|Q3THJ6_MOUSE;tr|A2AM97|A2AM97_MOUSE;sp|Q6ZWV3|RL10_MOUSE;sp|P86048|RL10L_MOUSE;tr|A0A1B0GXC3|A0A1B0GXC3_MOUSE;tr|B7FAU6|B7FAU6_MOUSE;tr|O89059|O89059_MOUSE	tr|I7HLV2|I7HLV2_MOUSE;tr|Q3THJ6|Q3THJ6_MOUSE;tr|A2AM97|A2AM97_MOUSE;sp|Q6ZWV3|RL10_MOUSE;sp|P86048|RL10L_MOUSE	tr|I7HLV2|I7HLV2_MOUSE 60S ribosomal protein L10 (Fragment) OS=Mus musculus OX=10090 GN=Rpl10 PE=1 SV=1;tr|Q3THJ6|Q3THJ6_MOUSE Uncharacterized protein OS=Mus musculus OX=10090 PE=2 SV=1;tr|A2AM97|A2AM97_MOUSE Ribosomal protein 10 OS=Mus musculus OX=10090 G	I7HLV2	Rpl10 RP23-436K3.4-003	60S ribosomal protein L10 (Ribosomal protein 10) (Fragment)	8	11	11	50.2	23.072	2597700000	2531400000	2586900000	2068400000	2197400000	2378600000	0.86112	0.0179828
sp|Q9CZX7|PP4P2_MOUSE;tr|E0CZF6|E0CZF6_MOUSE;tr|E0CZ18|E0CZ18_MOUSE	sp|Q9CZX7|PP4P2_MOUSE	sp|Q9CZX7|PP4P2_MOUSE Type 2 phosphatidylinositol 4,5-bisphosphate 4-phosphatase OS=Mus musculus OX=10090 GN=Pip4p2 PE=1 SV=1	Q9CZX7	Pip4p2 Tmem55a	Type 2 phosphatidylinositol 4,5-bisphosphate 4-phosphatase (Type 2 PtdIns-4,5-P2 4-Ptase) (EC 3.1.3.78) (PtdIns-4,5-P2 4-Ptase II) (Transmembrane protein 55A)	3	6	5	35.8	28.038	86918000	85608000	77064000	70326000	72372000	70053000	0.852402	0.0180308
sp|A6H619|PHRF1_MOUSE;tr|F7ANA1|F7ANA1_MOUSE	sp|A6H619|PHRF1_MOUSE	sp|A6H619|PHRF1_MOUSE PHD and RING finger domain-containing protein 1 OS=Mus musculus OX=10090 GN=Phrf1 PE=1 SV=2	A6H619	Phrf1 Kiaa1542	PHD and RING finger domain-containing protein 1	2	6	6	6.3	184.08	33257000	30206000	29959000	27229000	24636000	26397000	0.837726	0.0180637
tr|B2RTE3|B2RTE3_MOUSE;sp|Q4FK66|PR38A_MOUSE	tr|B2RTE3|B2RTE3_MOUSE;sp|Q4FK66|PR38A_MOUSE	tr|B2RTE3|B2RTE3_MOUSE MCG17981 OS=Mus musculus OX=10090 GN=Prpf38a PE=2 SV=1;sp|Q4FK66|PR38A_MOUSE Pre-mRNA-splicing factor 38A OS=Mus musculus OX=10090 GN=Prpf38a PE=1 SV=1	B2RTE3	Prpf38a mCG_17981	MCG17981 (PRP38 pre-mRNA processing factor 38 (Yeast) domain containing A)	2	10	10	27.6	37.436	165800000	165950000	169360000	162060000	156670000	159880000	0.9551	0.0183574
sp|Q6ZWQ7|SPCS3_MOUSE	sp|Q6ZWQ7|SPCS3_MOUSE	sp|Q6ZWQ7|SPCS3_MOUSE Signal peptidase complex subunit 3 OS=Mus musculus OX=10090 GN=Spcs3 PE=1 SV=1	Q6ZWQ7	Spcs3	Signal peptidase complex subunit 3 (EC 3.4.-.-) (Microsomal signal peptidase 22/23 kDa subunit) (SPC22/23) (SPase 22/23 kDa subunit)	1	3	3	17.8	20.313	224730000	214290000	182850000	152380000	164310000	153610000	0.756267	0.0183989
sp|Q99J95|CDK9_MOUSE;tr|B0R021|B0R021_MOUSE;tr|D6RHP4|D6RHP4_MOUSE;tr|D6RGN3|D6RGN3_MOUSE;tr|Q8C411|Q8C411_MOUSE;tr|Q8BN81|Q8BN81_MOUSE;tr|Q6NVF8|Q6NVF8_MOUSE;tr|I6L9D3|I6L9D3_MOUSE;sp|Q3V3A1|CDK15_MOUSE;tr|E3W997|E3W997_MOUSE;tr|E9PVC7|E9PVC7_MOUSE;tr|Q3TM24|Q3TM24_MOUSE;sp|O35495|CDK14_MOUSE;tr|A0A1L1SUS7|A0A1L1SUS7_MOUSE;tr|Q91WP4|Q91WP4_MOUSE;tr|Q543G3|Q543G3_MOUSE;tr|Q3UPI3|Q3UPI3_MOUSE;sp|Q…	sp|Q99J95|CDK9_MOUSE	sp|Q99J95|CDK9_MOUSE Cyclin-dependent kinase 9 OS=Mus musculus OX=10090 GN=Cdk9 PE=1 SV=1	Q99J95	Cdk9	Cyclin-dependent kinase 9 (EC 2.7.11.22) (EC 2.7.11.23) (Cell division protein kinase 9)	19	10	9	32.5	42.761	74403000	70956000	73228000	61905000	68146000	64699000	0.89095	0.0184577
sp|P11679|K2C8_MOUSE;CON__H-INV:HIT000292931;CON__H-INV:HIT000016045;tr|Q8BIS2|Q8BIS2_MOUSE;tr|Q148Q7|Q148Q7_MOUSE;tr|E9Q1Z0|E9Q1Z0_MOUSE;tr|Q4L0E7|Q4L0E7_MOUSE;tr|Q678L1|Q678L1_MOUSE;sp|P07744|K2C4_MOUSE;CON__P07744;tr|Q9CV13|Q9CV13_MOUSE;CON__REFSEQ:XP_092267;CON__Q14CN4-1;sp|Q6IME9|K2C72_MOUSE;CON__Q6IME9;CON__Q7RTS7;CON__Q32MB2;tr|Q6IFZ8|Q6IFZ8_MOUSE	sp|P11679|K2C8_MOUSE	sp|P11679|K2C8_MOUSE Keratin, type II cytoskeletal 8 OS=Mus musculus OX=10090 GN=Krt8 PE=1 SV=4	P11679	Krt8 Krt2-8	Keratin, type II cytoskeletal 8 (Cytokeratin endo A) (Cytokeratin-8) (CK-8) (Keratin-8) (K8) (Type-II keratin Kb8)	18	47	17	72.4	54.565	15016000000	15041000000	15134000000	13769000000	13971000000	14588000000	0.936647	0.0185603
tr|Q80ZX0|Q80ZX0_MOUSE;tr|Q3UDH4|Q3UDH4_MOUSE;tr|Q3U882|Q3U882_MOUSE;tr|F6VJC5|F6VJC5_MOUSE;tr|Q6PFZ1|Q6PFZ1_MOUSE;tr|F6YIN5|F6YIN5_MOUSE	tr|Q80ZX0|Q80ZX0_MOUSE;tr|Q3UDH4|Q3UDH4_MOUSE;tr|Q3U882|Q3U882_MOUSE;tr|F6VJC5|F6VJC5_MOUSE;tr|Q6PFZ1|Q6PFZ1_MOUSE	tr|Q80ZX0|Q80ZX0_MOUSE Sec24-related gene family, member B (S. cerevisiae) OS=Mus musculus OX=10090 GN=Sec24b PE=1 SV=1;tr|Q3UDH4|Q3UDH4_MOUSE Uncharacterized protein (Fragment) OS=Mus musculus OX=10090 GN=Sec24b PE=2 SV=1;tr|Q3U882|Q3U882_MOUSE Uncharacte	Q80ZX0	Sec24b	Sec24-related gene family, member B (S. cerevisiae)	6	11	11	14.1	135.55	25982000	28469000	31035000	34095000	33754000	35609000	1.21023	0.0186972
tr|G5E924|G5E924_MOUSE;tr|Q3UMT7|Q3UMT7_MOUSE	tr|G5E924|G5E924_MOUSE;tr|Q3UMT7|Q3UMT7_MOUSE	tr|G5E924|G5E924_MOUSE Heterogeneous nuclear ribonucleoprotein L (Fragment) OS=Mus musculus OX=10090 GN=Hnrnpl PE=1 SV=1;tr|Q3UMT7|Q3UMT7_MOUSE Uncharacterized protein OS=Mus musculus OX=10090 GN=Hnrnpl PE=2 SV=1	G5E924	Hnrnpl	Heterogeneous nuclear ribonucleoprotein L (Fragment)	2	31	3	63.3	66.821	8921700000	9144600000	8729400000	8299500000	8323300000	8540100000	0.939065	0.0187035
tr|E9Q6L0|E9Q6L0_MOUSE;tr|B2RY22|B2RY22_MOUSE;tr|J3QP81|J3QP81_MOUSE;tr|A5D6Q8|A5D6Q8_MOUSE;tr|A0A087WS18|A0A087WS18_MOUSE;tr|A0A087WQF1|A0A087WQF1_MOUSE;tr|A0A087WQ95|A0A087WQ95_MOUSE;tr|A0A087WNW8|A0A087WNW8_MOUSE;tr|A0A087WRK0|A0A087WRK0_MOUSE;tr|A0A087WP42|A0A087WP42_MOUSE;tr|E9QNY9|E9QNY9_MOUSE;tr|A0A087WRE8|A0A087WRE8_MOUSE;tr|E9QKH0|E9QKH0_MOUSE;tr|A0A087WQ31|A0A087WQ31_MOUSE;sp|Q80TV8|CLA…	tr|E9Q6L0|E9Q6L0_MOUSE;tr|B2RY22|B2RY22_MOUSE;tr|J3QP81|J3QP81_MOUSE;tr|A5D6Q8|A5D6Q8_MOUSE;tr|A0A087WS18|A0A087WS18_MOUSE;tr|A0A087WQF1|A0A087WQF1_MOUSE;tr|A0A087WQ95|A0A087WQ95_MOUSE;tr|A0A087WNW8|A0A087WNW8_MOUSE;tr|A0A087WRK0|A0A087WRK0_MOUSE;tr|A0A087WP42|A0A087WP42_MOUSE;tr|E9QNY9|E9QNY9_MOUSE;tr|A0A087WRE8|A0A087WRE8_MOUSE;tr|E9QKH0|E9QKH0_MOUSE;tr|A0A087WQ31|A0A087WQ31_MOUSE;sp|Q80TV8|CLA…	tr|E9Q6L0|E9Q6L0_MOUSE CLIP-associating protein 1 OS=Mus musculus OX=10090 GN=Clasp1 PE=1 SV=2;tr|B2RY22|B2RY22_MOUSE Clasp1 protein OS=Mus musculus OX=10090 GN=Clasp1 PE=2 SV=1;tr|J3QP81|J3QP81_MOUSE CLIP-associating protein 1 OS=Mus musculus OX=10090 GN=	E9Q6L0	Clasp1	CLIP-associating protein 1	23	19	16	18.8	160.23	98894000	114770000	97565000	84471000	78557000	81875000	0.78689	0.0187586
sp|Q9CYH2|PXL2A_MOUSE;tr|Q3U125|Q3U125_MOUSE;tr|D3Z252|D3Z252_MOUSE;tr|D3YYG8|D3YYG8_MOUSE;tr|D3Z398|D3Z398_MOUSE;tr|D3Z0A8|D3Z0A8_MOUSE;tr|D3YWL4|D3YWL4_MOUSE;tr|D3Z143|D3Z143_MOUSE	sp|Q9CYH2|PXL2A_MOUSE;tr|Q3U125|Q3U125_MOUSE;tr|D3Z252|D3Z252_MOUSE;tr|D3YYG8|D3YYG8_MOUSE;tr|D3Z398|D3Z398_MOUSE	sp|Q9CYH2|PXL2A_MOUSE Peroxiredoxin-like 2A OS=Mus musculus OX=10090 GN=Prxl2a PE=1 SV=2;tr|Q3U125|Q3U125_MOUSE Peroxiredoxin-like 2A OS=Mus musculus OX=10090 GN=Prxl2a PE=1 SV=1;tr|D3Z252|D3Z252_MOUSE Peroxiredoxin-like 2A (Fragment) OS=Mus musculus OX=10	Q9CYH2	Prxl2a Fam213a Pamm	Peroxiredoxin-like 2A (Peroxiredoxin-like 2 activated in M-CSF stimulated monocytes) (Protein PAMM) (Redox-regulatory protein FAM213A)	8	9	9	39	24.394	233450000	232310000	203870000	188130000	186820000	180960000	0.830175	0.0187802
sp|Q91VA6|PDIP2_MOUSE;tr|F6SQH7|F6SQH7_MOUSE	sp|Q91VA6|PDIP2_MOUSE;tr|F6SQH7|F6SQH7_MOUSE	sp|Q91VA6|PDIP2_MOUSE Polymerase delta-interacting protein 2 OS=Mus musculus OX=10090 GN=Poldip2 PE=1 SV=1;tr|F6SQH7|F6SQH7_MOUSE Polymerase delta-interacting protein 2 (Fragment) OS=Mus musculus OX=10090 GN=Poldip2 PE=1 SV=1	Q91VA6	Poldip2	Polymerase delta-interacting protein 2	2	15	15	51.1	41.87	290140000	295840000	276610000	310200000	309180000	308730000	1.07596	0.018798
sp|Q9EQ80|NIF3L_MOUSE;tr|D3Z0G0|D3Z0G0_MOUSE;tr|Q8C608|Q8C608_MOUSE;tr|Q3V2R8|Q3V2R8_MOUSE;tr|Q5FWC8|Q5FWC8_MOUSE;tr|E9PWJ6|E9PWJ6_MOUSE;tr|Q9D146|Q9D146_MOUSE;tr|D3YYF0|D3YYF0_MOUSE	sp|Q9EQ80|NIF3L_MOUSE;tr|D3Z0G0|D3Z0G0_MOUSE;tr|Q8C608|Q8C608_MOUSE;tr|Q3V2R8|Q3V2R8_MOUSE;tr|Q5FWC8|Q5FWC8_MOUSE	sp|Q9EQ80|NIF3L_MOUSE NIF3-like protein 1 OS=Mus musculus OX=10090 GN=Nif3l1 PE=1 SV=4;tr|D3Z0G0|D3Z0G0_MOUSE NIF3-like protein 1 OS=Mus musculus OX=10090 GN=Nif3l1 PE=1 SV=1;tr|Q8C608|Q8C608_MOUSE NIF3-like protein 1 OS=Mus musculus OX=10090 PE=2 SV=1;tr|	Q9EQ80	Nif3l1	NIF3-like protein 1	8	7	7	26.3	41.745	75219000	49406000	65714000	100840000	90870000	91883000	1.48994	0.0190722
tr|Q149V4|Q149V4_MOUSE;sp|Q64523|H2A2C_MOUSE;tr|B2RWH3|B2RWH3_MOUSE;sp|Q6GSS7|H2A2A_MOUSE	tr|Q149V4|Q149V4_MOUSE;sp|Q64523|H2A2C_MOUSE;tr|B2RWH3|B2RWH3_MOUSE;sp|Q6GSS7|H2A2A_MOUSE	tr|Q149V4|Q149V4_MOUSE Histone H2A OS=Mus musculus OX=10090 GN=Hist2h2ac PE=2 SV=1;sp|Q64523|H2A2C_MOUSE Histone H2A type 2-C OS=Mus musculus OX=10090 GN=Hist2h2ac PE=1 SV=3;tr|B2RWH3|B2RWH3_MOUSE Histone H2A OS=Mus musculus OX=10090 GN=Hist2h2aa1 PE=2 SV=	Q149V4	Hist2h2ac mCG_50606	Histone H2A	4	7	1	58.1	13.988	8131300000	8326600000	8512500000	6802200000	7575600000	7508400000	0.876486	0.0191488
tr|Q922Z3|Q922Z3_MOUSE;tr|Q3UPJ8|Q3UPJ8_MOUSE;tr|Q3TK29|Q3TK29_MOUSE;sp|Q9CQN1|TRAP1_MOUSE;tr|Q922R9|Q922R9_MOUSE;tr|Q3TSG8|Q3TSG8_MOUSE	tr|Q922Z3|Q922Z3_MOUSE;tr|Q3UPJ8|Q3UPJ8_MOUSE;tr|Q3TK29|Q3TK29_MOUSE;sp|Q9CQN1|TRAP1_MOUSE;tr|Q922R9|Q922R9_MOUSE;tr|Q3TSG8|Q3TSG8_MOUSE	tr|Q922Z3|Q922Z3_MOUSE Trap1 protein (Fragment) OS=Mus musculus OX=10090 GN=Trap1 PE=2 SV=1;tr|Q3UPJ8|Q3UPJ8_MOUSE Uncharacterized protein OS=Mus musculus OX=10090 GN=Trap1 PE=2 SV=1;tr|Q3TK29|Q3TK29_MOUSE Uncharacterized protein OS=Mus musculus OX=10090 G	Q922Z3	Trap1	Trap1 protein (Fragment)	6	29	29	54.6	80.077	2378500000	2288400000	2309700000	2178200000	2216600000	2109400000	0.932288	0.0192009
sp|Q60597|ODO1_MOUSE;tr|Z4YJV4|Z4YJV4_MOUSE;tr|Q6P8I7|Q6P8I7_MOUSE;tr|B2RXT3|B2RXT3_MOUSE;tr|E9Q7L0|E9Q7L0_MOUSE;tr|Q5SVY0|Q5SVY0_MOUSE;tr|Q5SVY1|Q5SVY1_MOUSE	sp|Q60597|ODO1_MOUSE;tr|Z4YJV4|Z4YJV4_MOUSE	sp|Q60597|ODO1_MOUSE 2-oxoglutarate dehydrogenase, mitochondrial OS=Mus musculus OX=10090 GN=Ogdh PE=1 SV=3;tr|Z4YJV4|Z4YJV4_MOUSE 2-oxoglutarate dehydrogenase, mitochondrial OS=Mus musculus OX=10090 GN=Ogdh PE=1 SV=1	Q60597	Ogdh Kiaa4192	2-oxoglutarate dehydrogenase, mitochondrial (EC 1.2.4.2) (2-oxoglutarate dehydrogenase complex component E1) (OGDC-E1) (Alpha-ketoglutarate dehydrogenase)	7	54	54	57.1	116.45	2880400000	2835800000	2701300000	2590600000	2578800000	2448300000	0.904984	0.0194488
sp|Q8R081|HNRPL_MOUSE;tr|G3UY38|G3UY38_MOUSE;tr|Q8BI42|Q8BI42_MOUSE;tr|Q9CVU5|Q9CVU5_MOUSE;tr|G3UY56|G3UY56_MOUSE;tr|G3UYY3|G3UYY3_MOUSE	sp|Q8R081|HNRPL_MOUSE;tr|G3UY38|G3UY38_MOUSE	sp|Q8R081|HNRPL_MOUSE Heterogeneous nuclear ribonucleoprotein L OS=Mus musculus OX=10090 GN=Hnrnpl PE=1 SV=2;tr|G3UY38|G3UY38_MOUSE Heterogeneous nuclear ribonucleoprotein L OS=Mus musculus OX=10090 GN=Hnrnpl PE=1 SV=1	Q8R081	Hnrnpl Hnrpl	Heterogeneous nuclear ribonucleoprotein L (hnRNP L)	6	30	2	68.8	63.963	267510000	353880000	321380000	192830000	229090000	163370000	0.620819	0.0194931
sp|P62141|PP1B_MOUSE;tr|A0A0J9YUU8|A0A0J9YUU8_MOUSE;tr|A0A0J9YUG2|A0A0J9YUG2_MOUSE	sp|P62141|PP1B_MOUSE	sp|P62141|PP1B_MOUSE Serine/threonine-protein phosphatase PP1-beta catalytic subunit OS=Mus musculus OX=10090 GN=Ppp1cb PE=1 SV=3	P62141	Ppp1cb	Serine/threonine-protein phosphatase PP1-beta catalytic subunit (PP-1B) (EC 3.1.3.16) (EC 3.1.3.53)	3	20	8	74.3	37.186	234730000	235800000	256540000	180650000	215180000	184200000	0.797764	0.0199123
sp|Q8BGX2|TIM29_MOUSE	sp|Q8BGX2|TIM29_MOUSE	sp|Q8BGX2|TIM29_MOUSE Mitochondrial import inner membrane translocase subunit Tim29 OS=Mus musculus OX=10090 GN=Timm29 PE=1 SV=1	Q8BGX2	Timm29	Mitochondrial import inner membrane translocase subunit Tim29 (TIM29)	1	9	9	41.4	29.415	72239000	69537000	75153000	83024000	78480000	86001000	1.14095	0.0200558
sp|P55264|ADK_MOUSE;tr|Q8BMC5|Q8BMC5_MOUSE;tr|A0A286YCD7|A0A286YCD7_MOUSE;tr|Q99PB8|Q99PB8_MOUSE;tr|Q3TZR1|Q3TZR1_MOUSE;tr|A0A286YCN3|A0A286YCN3_MOUSE;tr|Q8BWS6|Q8BWS6_MOUSE	sp|P55264|ADK_MOUSE;tr|Q8BMC5|Q8BMC5_MOUSE;tr|A0A286YCD7|A0A286YCD7_MOUSE	sp|P55264|ADK_MOUSE Adenosine kinase OS=Mus musculus OX=10090 GN=Adk PE=1 SV=2;tr|Q8BMC5|Q8BMC5_MOUSE Uncharacterized protein OS=Mus musculus OX=10090 GN=Adk PE=2 SV=1;tr|A0A286YCD7|A0A286YCD7_MOUSE Adenosine kinase (Fragment) OS=Mus musculus OX=10090 GN=A	P55264	Adk	Adenosine kinase (AK) (EC 2.7.1.20) (Adenosine 5'-phosphotransferase)	7	5	5	18.8	40.148	25103000	27638000	33256000	36755000	44662000	44692000	1.46643	0.0201097
sp|Q80WQ6|RHDF2_MOUSE;tr|Q8BJ16|Q8BJ16_MOUSE	sp|Q80WQ6|RHDF2_MOUSE	sp|Q80WQ6|RHDF2_MOUSE Inactive rhomboid protein 2 OS=Mus musculus OX=10090 GN=Rhbdf2 PE=1 SV=1	Q80WQ6	Rhbdf2 Irhom2 Rhbdl6 Rhor	Inactive rhomboid protein 2 (iRhom2) (Rhomboid family member 2) (Rhomboid veinlet-like protein 6) (Rhomboid-related protein)	2	5	5	8.2	93.433	56704000	62055000	56389000	51282000	43558000	47875000	0.814825	0.0201941
tr|Q6NX62|Q6NX62_MOUSE;tr|Q6PCW8|Q6PCW8_MOUSE;tr|Q546F8|Q546F8_MOUSE;sp|Q9D753|EXOS8_MOUSE;tr|Q571G2|Q571G2_MOUSE;tr|D3YYN3|D3YYN3_MOUSE;tr|Q3TEB9|Q3TEB9_MOUSE;tr|F6SGT4|F6SGT4_MOUSE	tr|Q6NX62|Q6NX62_MOUSE;tr|Q6PCW8|Q6PCW8_MOUSE;tr|Q546F8|Q546F8_MOUSE;sp|Q9D753|EXOS8_MOUSE;tr|Q571G2|Q571G2_MOUSE;tr|D3YYN3|D3YYN3_MOUSE;tr|Q3TEB9|Q3TEB9_MOUSE;tr|F6SGT4|F6SGT4_MOUSE	tr|Q6NX62|Q6NX62_MOUSE Exosc8 protein (Fragment) OS=Mus musculus OX=10090 GN=Exosc8 PE=2 SV=1;tr|Q6PCW8|Q6PCW8_MOUSE Exosome component 8 OS=Mus musculus OX=10090 GN=Exosc8 PE=2 SV=1;tr|Q546F8|Q546F8_MOUSE CBP-interacting protein 3 OS=Mus musculus OX=10090	Q6NX62	Exosc8	Exosc8 protein (Fragment)	8	6	6	32.6	29.343	73576000	74378000	79856000	90757000	84757000	84344000	1.14068	0.0202397
sp|Q7M759|AB17B_MOUSE	sp|Q7M759|AB17B_MOUSE	sp|Q7M759|AB17B_MOUSE Alpha/beta hydrolase domain-containing protein 17B OS=Mus musculus OX=10090 GN=Abhd17b PE=1 SV=1	Q7M759	Abhd17b	Alpha/beta hydrolase domain-containing protein 17B (Abhydrolase domain-containing protein 17B) (EC 3.1.2.22)	1	3	3	18.1	32.2	24644000	23726000	20239000	16795000	18093000	17995000	0.770788	0.0202872
sp|Q8R016|BLMH_MOUSE;tr|E9PY26|E9PY26_MOUSE;tr|E9Q6V3|E9Q6V3_MOUSE;tr|E9QA53|E9QA53_MOUSE;tr|E9PZH4|E9PZH4_MOUSE	sp|Q8R016|BLMH_MOUSE	sp|Q8R016|BLMH_MOUSE Bleomycin hydrolase OS=Mus musculus OX=10090 GN=Blmh PE=1 SV=1	Q8R016	Blmh	Bleomycin hydrolase (BH) (BLM hydrolase) (BMH) (EC 3.4.22.40)	5	7	7	21.3	52.511	60477000	63885000	61989000	71754000	78574000	69178000	1.17792	0.0204867
tr|D3Z645|D3Z645_MOUSE;sp|Q9QZ88|VPS29_MOUSE;tr|D3YYD5|D3YYD5_MOUSE;tr|D3YW98|D3YW98_MOUSE	tr|D3Z645|D3Z645_MOUSE;sp|Q9QZ88|VPS29_MOUSE;tr|D3YYD5|D3YYD5_MOUSE;tr|D3YW98|D3YW98_MOUSE	tr|D3Z645|D3Z645_MOUSE Vacuolar protein sorting-associated protein 29 OS=Mus musculus OX=10090 GN=Vps29 PE=1 SV=1;sp|Q9QZ88|VPS29_MOUSE Vacuolar protein sorting-associated protein 29 OS=Mus musculus OX=10090 GN=Vps29 PE=1 SV=1;tr|D3YYD5|D3YYD5_MOUSE Vacuol	D3Z645	Vps29	Vacuolar protein sorting-associated protein 29 (Vesicle protein sorting 29)	4	4	4	31.2	16.137	57662000	63298000	68161000	79746000	107450000	101330000	1.52562	0.0206695
sp|Q8C5H8|NAKD2_MOUSE;tr|Q14BL1|Q14BL1_MOUSE;tr|Z4YK42|Z4YK42_MOUSE;tr|Q9CUB4|Q9CUB4_MOUSE;tr|A0A087WQI8|A0A087WQI8_MOUSE	sp|Q8C5H8|NAKD2_MOUSE;tr|Q14BL1|Q14BL1_MOUSE;tr|Z4YK42|Z4YK42_MOUSE;tr|Q9CUB4|Q9CUB4_MOUSE	sp|Q8C5H8|NAKD2_MOUSE NAD kinase 2, mitochondrial OS=Mus musculus OX=10090 GN=Nadk2 PE=1 SV=2;tr|Q14BL1|Q14BL1_MOUSE 1110020G09Rik protein (Fragment) OS=Mus musculus OX=10090 GN=Nadk2 PE=2 SV=2;tr|Z4YK42|Z4YK42_MOUSE NAD kinase 2, mitochondrial OS=Mus musc	Q8C5H8	Nadk2 Mnadk Nadkd1	NAD kinase 2, mitochondrial (EC 2.7.1.23) (Mitochondrial NAD kinase) (NAD kinase domain-containing protein 1, mitochondrial)	5	11	11	35.6	50.858	137040000	131420000	133680000	146920000	162230000	149140000	1.13963	0.0206929
tr|B2RVQ1|B2RVQ1_MOUSE;sp|Q9CQG6|TM147_MOUSE;tr|A0A140LJ56|A0A140LJ56_MOUSE;tr|A0A140LIC5|A0A140LIC5_MOUSE;tr|A0A140LIN7|A0A140LIN7_MOUSE;tr|A0A140LIQ8|A0A140LIQ8_MOUSE	tr|B2RVQ1|B2RVQ1_MOUSE;sp|Q9CQG6|TM147_MOUSE;tr|A0A140LJ56|A0A140LJ56_MOUSE;tr|A0A140LIC5|A0A140LIC5_MOUSE;tr|A0A140LIN7|A0A140LIN7_MOUSE;tr|A0A140LIQ8|A0A140LIQ8_MOUSE	tr|B2RVQ1|B2RVQ1_MOUSE Transmembrane protein 147 OS=Mus musculus OX=10090 GN=Tmem147 PE=2 SV=1;sp|Q9CQG6|TM147_MOUSE Transmembrane protein 147 OS=Mus musculus OX=10090 GN=Tmem147 PE=1 SV=1;tr|A0A140LJ56|A0A140LJ56_MOUSE Transmembrane protein 147 OS=Mus mus	B2RVQ1	Tmem147 mCG_22785	Transmembrane protein 147 (Transmembrane protein 147, isoform CRA_b)	6	2	2	8.5	25.335	12247000	12630000	11211000	15001000	13545000	14177000	1.18386	0.0208377
tr|B0R091|B0R091_MOUSE;sp|P61022|CHP1_MOUSE;tr|B0R092|B0R092_MOUSE	tr|B0R091|B0R091_MOUSE;sp|P61022|CHP1_MOUSE	tr|B0R091|B0R091_MOUSE Calcineurin B homologous protein 1 OS=Mus musculus OX=10090 GN=Chp1 PE=1 SV=1;sp|P61022|CHP1_MOUSE Calcineurin B homologous protein 1 OS=Mus musculus OX=10090 GN=Chp1 PE=1 SV=2	B0R091	Chp1 1500003O03Rik	Calcineurin B homologous protein 1	3	7	7	44.5	21.997	153060000	103400000	116860000	184580000	187940000	172890000	1.46097	0.0208796
sp|Q99P72|RTN4_MOUSE	sp|Q99P72|RTN4_MOUSE	sp|Q99P72|RTN4_MOUSE Reticulon-4 OS=Mus musculus OX=10090 GN=Rtn4 PE=1 SV=2	Q99P72	Rtn4 Kiaa0886 Nogo	Reticulon-4 (Neurite outgrowth inhibitor) (Nogo protein)	1	34	21	51.4	126.61	3648900000	3753000000	3427900000	3945200000	3966400000	4084800000	1.10772	0.0209202
tr|F7CGG2|F7CGG2_MOUSE;tr|E9QLK7|E9QLK7_MOUSE;tr|E9PZA7|E9PZA7_MOUSE;tr|E9PWT1|E9PWT1_MOUSE;tr|A0A1D5RLL4|A0A1D5RLL4_MOUSE;sp|Q80YV3|TRRAP_MOUSE;tr|Q3UH32|Q3UH32_MOUSE;tr|Q3TIP5|Q3TIP5_MOUSE	tr|F7CGG2|F7CGG2_MOUSE;tr|E9QLK7|E9QLK7_MOUSE;tr|E9PZA7|E9PZA7_MOUSE;tr|E9PWT1|E9PWT1_MOUSE;tr|A0A1D5RLL4|A0A1D5RLL4_MOUSE;sp|Q80YV3|TRRAP_MOUSE;tr|Q3UH32|Q3UH32_MOUSE	tr|F7CGG2|F7CGG2_MOUSE Transformation/transcription domain-associated protein (Fragment) OS=Mus musculus OX=10090 GN=Trrap PE=1 SV=1;tr|E9QLK7|E9QLK7_MOUSE Transformation/transcription domain-associated protein OS=Mus musculus OX=10090 GN=Trrap PE=1 SV=1;t	F7CGG2	Trrap	Transformation/transcription domain-associated protein (Fragment)	8	12	12	4.9	405.42	37369000	39281000	38532000	44258000	49636000	43522000	1.19303	0.0209262
tr|Q7TQ39|Q7TQ39_MOUSE	tr|Q7TQ39|Q7TQ39_MOUSE	tr|Q7TQ39|Q7TQ39_MOUSE Gag protein OS=Mus musculus OX=10090 GN=gag PE=4 SV=1	Q7TQ39	gag	Gag protein	1	22	4	38.9	65.444	170130000	177610000	161340000	153050000	152960000	148940000	0.893671	0.0210667
tr|Q3UQ52|Q3UQ52_MOUSE;tr|Q3TTU7|Q3TTU7_MOUSE;tr|Q2M4J5|Q2M4J5_MOUSE;sp|P41245|MMP9_MOUSE;tr|A2A5K8|A2A5K8_MOUSE	tr|Q3UQ52|Q3UQ52_MOUSE;tr|Q3TTU7|Q3TTU7_MOUSE;tr|Q2M4J5|Q2M4J5_MOUSE;sp|P41245|MMP9_MOUSE	tr|Q3UQ52|Q3UQ52_MOUSE Uncharacterized protein OS=Mus musculus OX=10090 GN=Mmp9 PE=2 SV=1;tr|Q3TTU7|Q3TTU7_MOUSE Uncharacterized protein OS=Mus musculus OX=10090 GN=Mmp9 PE=2 SV=1;tr|Q2M4J5|Q2M4J5_MOUSE Matrix metalloproteinase 9 OS=Mus musculus OX=10090 G	Q3UQ52	Mmp9	Uncharacterized protein	5	15	15	27.7	80.481	197190000	191760000	175530000	152920000	145020000	166580000	0.822917	0.0212093
tr|Q3TD71|Q3TD71_MOUSE;sp|Q8K021|SCAM1_MOUSE;tr|Q9D577|Q9D577_MOUSE;tr|Q3TSA8|Q3TSA8_MOUSE;tr|Q3UY11|Q3UY11_MOUSE;tr|D3YTP4|D3YTP4_MOUSE	tr|Q3TD71|Q3TD71_MOUSE;sp|Q8K021|SCAM1_MOUSE;tr|Q9D577|Q9D577_MOUSE;tr|Q3TSA8|Q3TSA8_MOUSE;tr|Q3UY11|Q3UY11_MOUSE	tr|Q3TD71|Q3TD71_MOUSE Secretory carrier-associated membrane protein OS=Mus musculus OX=10090 GN=Scamp1 PE=1 SV=1;sp|Q8K021|SCAM1_MOUSE Secretory carrier-associated membrane protein 1 OS=Mus musculus OX=10090 GN=Scamp1 PE=1 SV=1;tr|Q9D577|Q9D577_MOUSE Secr	Q3TD71	Scamp1 mCG_114101	Secretory carrier-associated membrane protein (Secretory carrier membrane protein)	6	7	7	31.7	38.028	119150000	131750000	126440000	107940000	102360000	113590000	0.858351	0.0218032
tr|Q3UHI3|Q3UHI3_MOUSE;sp|O35134|RPA1_MOUSE;tr|Q3TU49|Q3TU49_MOUSE;tr|Q80Y46|Q80Y46_MOUSE;tr|Q05DK4|Q05DK4_MOUSE;tr|Q05BP7|Q05BP7_MOUSE;tr|Q8BNM6|Q8BNM6_MOUSE;tr|Q3TUG2|Q3TUG2_MOUSE;tr|Q8C2X2|Q8C2X2_MOUSE;tr|Q3UZ02|Q3UZ02_MOUSE;tr|A0A0U1RPM9|A0A0U1RPM9_MOUSE;tr|A0A0U1RPX8|A0A0U1RPX8_MOUSE;tr|Q8BR29|Q8BR29_MOUSE	tr|Q3UHI3|Q3UHI3_MOUSE;sp|O35134|RPA1_MOUSE;tr|Q3TU49|Q3TU49_MOUSE;tr|Q80Y46|Q80Y46_MOUSE;tr|Q05DK4|Q05DK4_MOUSE;tr|Q05BP7|Q05BP7_MOUSE;tr|Q8BNM6|Q8BNM6_MOUSE;tr|Q3TUG2|Q3TUG2_MOUSE;tr|Q8C2X2|Q8C2X2_MOUSE	tr|Q3UHI3|Q3UHI3_MOUSE DNA-directed RNA polymerase subunit OS=Mus musculus OX=10090 GN=Polr1a PE=2 SV=1;sp|O35134|RPA1_MOUSE DNA-directed RNA polymerase I subunit RPA1 OS=Mus musculus OX=10090 GN=Polr1a PE=1 SV=2;tr|Q3TU49|Q3TU49_MOUSE DNA-directed RNA pol	Q3UHI3	Polr1a Rpo1-4	DNA-directed RNA polymerase subunit (EC 2.7.7.6)	13	21	21	17	194.15	95132000	102110000	95781000	112510000	106370000	117870000	1.14923	0.0218703
sp|Q60817|NACA_MOUSE;sp|P70670|NACAM_MOUSE;tr|Q3UK68|Q3UK68_MOUSE	sp|Q60817|NACA_MOUSE;sp|P70670|NACAM_MOUSE;tr|Q3UK68|Q3UK68_MOUSE	sp|Q60817|NACA_MOUSE Nascent polypeptide-associated complex subunit alpha OS=Mus musculus OX=10090 GN=Naca PE=1 SV=1;sp|P70670|NACAM_MOUSE Nascent polypeptide-associated complex subunit alpha, muscle-specific form OS=Mus musculus OX=10090 GN=Naca PE=1 SV=2	Q60817	Naca	Nascent polypeptide-associated complex subunit alpha (Alpha-NAC) (Alpha-NAC/1.9.2)	3	6	6	35.8	23.384	611570000	568720000	579890000	675850000	663420000	628790000	1.1181	0.0220179
sp|O08582|GTPB1_MOUSE;tr|A0A2R8VKJ2|A0A2R8VKJ2_MOUSE;tr|A0A2R8W6Z1|A0A2R8W6Z1_MOUSE;tr|A0A2R8VI47|A0A2R8VI47_MOUSE;tr|A0A2R8W725|A0A2R8W725_MOUSE;tr|A0A2R8VHC2|A0A2R8VHC2_MOUSE	sp|O08582|GTPB1_MOUSE	sp|O08582|GTPB1_MOUSE GTP-binding protein 1 OS=Mus musculus OX=10090 GN=Gtpbp1 PE=1 SV=2	O08582	Gtpbp1 Gtpbp	GTP-binding protein 1 (G-protein 1) (GP-1) (GP1)	6	5	5	12.7	72.3	12540000	10946000	12071000	14446000	15347000	17776000	1.33782	0.0220412
tr|B1AWE0|B1AWE0_MOUSE;tr|Q6PFA2|Q6PFA2_MOUSE;tr|B1AWE1|B1AWE1_MOUSE;sp|O08585|CLCA_MOUSE;tr|B1AWD8|B1AWD8_MOUSE;tr|B1AWD9|B1AWD9_MOUSE;tr|Q3THU7|Q3THU7_MOUSE	tr|B1AWE0|B1AWE0_MOUSE;tr|Q6PFA2|Q6PFA2_MOUSE;tr|B1AWE1|B1AWE1_MOUSE;sp|O08585|CLCA_MOUSE;tr|B1AWD8|B1AWD8_MOUSE;tr|B1AWD9|B1AWD9_MOUSE;tr|Q3THU7|Q3THU7_MOUSE	tr|B1AWE0|B1AWE0_MOUSE Clathrin light chain OS=Mus musculus OX=10090 GN=Clta PE=1 SV=1;tr|Q6PFA2|Q6PFA2_MOUSE Clathrin light chain OS=Mus musculus OX=10090 GN=Clta PE=1 SV=1;tr|B1AWE1|B1AWE1_MOUSE Clathrin light chain OS=Mus musculus OX=10090 GN=Clta PE=1	B1AWE0	Clta	Clathrin light chain	7	10	10	38.9	23.478	889830000	925490000	887470000	827830000	784560000	847600000	0.910167	0.0222083
tr|Q8BX36|Q8BX36_MOUSE;tr|A2AJG0|A2AJG0_MOUSE;sp|Q80UU2|RPP38_MOUSE	tr|Q8BX36|Q8BX36_MOUSE;tr|A2AJG0|A2AJG0_MOUSE;sp|Q80UU2|RPP38_MOUSE	tr|Q8BX36|Q8BX36_MOUSE Uncharacterized protein (Fragment) OS=Mus musculus OX=10090 GN=Rpp38 PE=2 SV=1;tr|A2AJG0|A2AJG0_MOUSE Ribonuclease P protein subunit p38 OS=Mus musculus OX=10090 GN=Rpp38 PE=1 SV=1;sp|Q80UU2|RPP38_MOUSE Ribonuclease P protein subunit	Q8BX36	Rpp38	Ribosomal_L7Ae domain-containing protein (Fragment)	3	3	3	22.2	29.582	12131000	11125000	11551000	14410000	19782000	18664000	1.51855	0.0223688
sp|Q91VT4|CBR4_MOUSE;tr|D3Z6C4|D3Z6C4_MOUSE	sp|Q91VT4|CBR4_MOUSE;tr|D3Z6C4|D3Z6C4_MOUSE	sp|Q91VT4|CBR4_MOUSE Carbonyl reductase family member 4 OS=Mus musculus OX=10090 GN=Cbr4 PE=1 SV=2;tr|D3Z6C4|D3Z6C4_MOUSE Carbonyl reductase family member 4 (Fragment) OS=Mus musculus OX=10090 GN=Cbr4 PE=1 SV=1	Q91VT4	Cbr4	Carbonyl reductase family member 4 (EC 1.-.-.-) (3-ketoacyl-[acyl-carrier-protein] reductase beta subunit) (KAR beta subunit) (3-oxoacyl-[acyl-carrier-protein] reductase) (EC 1.1.1.-) (Quinone reductase CBR4)	2	8	8	39.8	25.414	154570000	117010000	146510000	103810000	90860000	90984000	0.683236	0.0223751
sp|Q923G2|RPAB3_MOUSE;tr|A0A338P6I2|A0A338P6I2_MOUSE;tr|A0A338P6M3|A0A338P6M3_MOUSE;tr|A0A338P6B4|A0A338P6B4_MOUSE	sp|Q923G2|RPAB3_MOUSE;tr|A0A338P6I2|A0A338P6I2_MOUSE;tr|A0A338P6M3|A0A338P6M3_MOUSE;tr|A0A338P6B4|A0A338P6B4_MOUSE	sp|Q923G2|RPAB3_MOUSE DNA-directed RNA polymerases I, II, and III subunit RPABC3 OS=Mus musculus OX=10090 GN=Polr2h PE=1 SV=3;tr|A0A338P6I2|A0A338P6I2_MOUSE DNA-directed RNA polymerases I, II, and III subunit RPABC3 OS=Mus musculus OX=10090 GN=Polr2h PE=1	Q923G2	Polr2h	DNA-directed RNA polymerases I, II, and III subunit RPABC3 (RNA polymerases I, II, and III subunit ABC3) (DNA-directed RNA polymerase II subunit H) (RPB17) (RPB8 homolog)	4	6	6	54.7	17.143	158740000	190120000	159130000	206190000	215090000	204750000	1.23237	0.0224739
sp|Q8JZU2|TXTP_MOUSE;tr|F6VVY4|F6VVY4_MOUSE	sp|Q8JZU2|TXTP_MOUSE;tr|F6VVY4|F6VVY4_MOUSE	sp|Q8JZU2|TXTP_MOUSE Tricarboxylate transport protein, mitochondrial OS=Mus musculus OX=10090 GN=Slc25a1 PE=1 SV=1;tr|F6VVY4|F6VVY4_MOUSE Tricarboxylate transport protein, mitochondrial (Fragment) OS=Mus musculus OX=10090 GN=Slc25a1 PE=1 SV=1	Q8JZU2	Slc25a1	Tricarboxylate transport protein, mitochondrial (Citrate transport protein) (CTP) (Solute carrier family 25 member 1) (Tricarboxylate carrier protein)	2	9	9	32.2	33.931	213530000	229930000	235300000	253430000	276620000	293890000	1.21389	0.0226697
sp|Q3U9G9|LBR_MOUSE;tr|A0A0A6YW01|A0A0A6YW01_MOUSE;tr|A0A0A6YXT6|A0A0A6YXT6_MOUSE;tr|A0A0A6YXW3|A0A0A6YXW3_MOUSE;tr|A0A0A6YY12|A0A0A6YY12_MOUSE;tr|A0A0A6YWS3|A0A0A6YWS3_MOUSE;tr|Q811V7|Q811V7_MOUSE	sp|Q3U9G9|LBR_MOUSE	sp|Q3U9G9|LBR_MOUSE Delta(14)-sterol reductase OS=Mus musculus OX=10090 GN=Lbr PE=1 SV=2	Q3U9G9	Lbr	Delta(14)-sterol reductase LBR (Delta-14-SR) (EC 1.3.1.70) (3-beta-hydroxysterol Delta (14)-reductase) (C-14 sterol reductase) (C14SR) (Integral nuclear envelope inner membrane protein) (Lamin-B receptor) (Sterol C14-reductase)	7	19	19	32.1	71.439	2808200000	2744800000	2494700000	2336100000	2287300000	2363600000	0.868198	0.0227974
tr|Q3U8F5|Q3U8F5_MOUSE	tr|Q3U8F5|Q3U8F5_MOUSE	tr|Q3U8F5|Q3U8F5_MOUSE Uncharacterized protein OS=Mus musculus OX=10090 GN=Psmd12 PE=2 SV=1	Q3U8F5	Psmd12	PCI domain-containing protein	1	19	1	49.3	52.867	209150000	226050000	246230000	302830000	262000000	291470000	1.25662	0.0228612
sp|P35235|PTN11_MOUSE;tr|Q9CT18|Q9CT18_MOUSE;tr|Q05C78|Q05C78_MOUSE	sp|P35235|PTN11_MOUSE;tr|Q9CT18|Q9CT18_MOUSE;tr|Q05C78|Q05C78_MOUSE	sp|P35235|PTN11_MOUSE Tyrosine-protein phosphatase non-receptor type 11 OS=Mus musculus OX=10090 GN=Ptpn11 PE=1 SV=2;tr|Q9CT18|Q9CT18_MOUSE Uncharacterized protein (Fragment) OS=Mus musculus OX=10090 GN=Ptpn11 PE=2 SV=1;tr|Q05C78|Q05C78_MOUSE Ptpn11 protei	P35235	Ptpn11	Tyrosine-protein phosphatase non-receptor type 11 (EC 3.1.3.48) (Protein-tyrosine phosphatase SYP) (SH-PTP2) (SHP-2) (Shp2)	3	4	4	8.5	68.46	10580000	NaN	9946600	9215100	8950200	9220700	0.889448	0.0228621
sp|Q8K4Z5|SF3A1_MOUSE;tr|Q3TVM1|Q3TVM1_MOUSE;tr|Q8BKK2|Q8BKK2_MOUSE	sp|Q8K4Z5|SF3A1_MOUSE;tr|Q3TVM1|Q3TVM1_MOUSE	sp|Q8K4Z5|SF3A1_MOUSE Splicing factor 3A subunit 1 OS=Mus musculus OX=10090 GN=Sf3a1 PE=1 SV=1;tr|Q3TVM1|Q3TVM1_MOUSE Uncharacterized protein OS=Mus musculus OX=10090 GN=Sf3a1 PE=2 SV=1	Q8K4Z5	Sf3a1	Splicing factor 3A subunit 1 (SF3a120)	3	34	34	47.3	88.544	1199800000	1207400000	1229100000	1241500000	1276800000	1278000000	1.044	0.0229088
tr|A2AQJ7|A2AQJ7_MOUSE;sp|Q8BXN9|TM87A_MOUSE;tr|A2AQJ5|A2AQJ5_MOUSE;tr|A2AQJ6|A2AQJ6_MOUSE	tr|A2AQJ7|A2AQJ7_MOUSE;sp|Q8BXN9|TM87A_MOUSE;tr|A2AQJ5|A2AQJ5_MOUSE;tr|A2AQJ6|A2AQJ6_MOUSE	tr|A2AQJ7|A2AQJ7_MOUSE Transmembrane protein 87A OS=Mus musculus OX=10090 GN=Tmem87a PE=1 SV=1;sp|Q8BXN9|TM87A_MOUSE Transmembrane protein 87A OS=Mus musculus OX=10090 GN=Tmem87a PE=1 SV=1;tr|A2AQJ5|A2AQJ5_MOUSE Transmembrane protein 87A OS=Mus musculus OX	A2AQJ7	Tmem87a	Transmembrane protein 87A	4	8	8	20.6	57.011	70207000	63523000	81210000	99730000	87131000	97173000	1.32146	0.0231531
sp|P22892|AP1G1_MOUSE;tr|Q8CBB7|Q8CBB7_MOUSE;tr|Q3UKX8|Q3UKX8_MOUSE;tr|Q8CC03|Q8CC03_MOUSE;tr|Q8BSZ7|Q8BSZ7_MOUSE;tr|Q3UHW6|Q3UHW6_MOUSE;tr|Q3U9D1|Q3U9D1_MOUSE;sp|O88512|AP1G2_MOUSE	sp|P22892|AP1G1_MOUSE;tr|Q8CBB7|Q8CBB7_MOUSE;tr|Q3UKX8|Q3UKX8_MOUSE;tr|Q8CC03|Q8CC03_MOUSE	sp|P22892|AP1G1_MOUSE AP-1 complex subunit gamma-1 OS=Mus musculus OX=10090 GN=Ap1g1 PE=1 SV=3;tr|Q8CBB7|Q8CBB7_MOUSE AP-1 complex subunit gamma OS=Mus musculus OX=10090 GN=Ap1g1 PE=1 SV=1;tr|Q3UKX8|Q3UKX8_MOUSE AP-1 complex subunit gamma OS=Mus musculus O	P22892	Ap1g1 Adtg Clapg1	AP-1 complex subunit gamma-1 (Adaptor protein complex AP-1 subunit gamma-1) (Adaptor-related protein complex 1 subunit gamma-1) (Clathrin assembly protein complex 1 gamma-1 large chain) (Gamma-adaptin) (Gamma1-adaptin) (Golgi adaptor HA1/AP1 adaptin subunit gamma-1)	8	22	22	33	91.349	211110000	198230000	184660000	168180000	161940000	139290000	0.790253	0.0233808
sp|Q9D338|RM19_MOUSE;tr|Q6P8U3|Q6P8U3_MOUSE;tr|Q3URF5|Q3URF5_MOUSE	sp|Q9D338|RM19_MOUSE;tr|Q6P8U3|Q6P8U3_MOUSE;tr|Q3URF5|Q3URF5_MOUSE	sp|Q9D338|RM19_MOUSE 39S ribosomal protein L19, mitochondrial OS=Mus musculus OX=10090 GN=Mrpl19 PE=1 SV=1;tr|Q6P8U3|Q6P8U3_MOUSE Mitochondrial ribosomal protein L19 OS=Mus musculus OX=10090 GN=Mrpl19 PE=2 SV=1;tr|Q3URF5|Q3URF5_MOUSE Uncharacterized protei	Q9D338	Mrpl19	39S ribosomal protein L19, mitochondrial (L19mt) (MRP-L19)	3	9	9	39.4	33.578	182760000	179200000	171650000	145270000	142690000	164540000	0.847998	0.023961
sp|P08752|GNAI2_MOUSE;tr|A0A0A6YWA9|A0A0A6YWA9_MOUSE;tr|Q8JZT4|Q8JZT4_MOUSE;sp|B2RSH2|GNAI1_MOUSE;tr|Q922Y6|Q922Y6_MOUSE	sp|P08752|GNAI2_MOUSE;tr|A0A0A6YWA9|A0A0A6YWA9_MOUSE	sp|P08752|GNAI2_MOUSE Guanine nucleotide-binding protein G(i) subunit alpha-2 OS=Mus musculus OX=10090 GN=Gnai2 PE=1 SV=5;tr|A0A0A6YWA9|A0A0A6YWA9_MOUSE Guanine nucleotide-binding protein G(i) subunit alpha-2 (Fragment) OS=Mus musculus OX=10090 GN=Gnai2 PE	P08752	Gnai2 Gnai-2	Guanine nucleotide-binding protein G(i) subunit alpha-2 (Adenylate cyclase-inhibiting G alpha protein)	5	18	13	60.8	40.489	2875500000	2767800000	2679100000	2533800000	2468800000	2598100000	0.913282	0.0240097
tr|E9Q7N5|E9Q7N5_MOUSE;sp|Q8R2Q4|RRF2M_MOUSE;tr|Q3TML3|Q3TML3_MOUSE;tr|Q3TSU6|Q3TSU6_MOUSE;tr|Q8C1C2|Q8C1C2_MOUSE;tr|E0CY79|E0CY79_MOUSE;tr|E0CXH2|E0CXH2_MOUSE	tr|E9Q7N5|E9Q7N5_MOUSE;sp|Q8R2Q4|RRF2M_MOUSE;tr|Q3TML3|Q3TML3_MOUSE;tr|Q3TSU6|Q3TSU6_MOUSE;tr|Q8C1C2|Q8C1C2_MOUSE;tr|E0CY79|E0CY79_MOUSE	tr|E9Q7N5|E9Q7N5_MOUSE Ribosome-releasing factor 2, mitochondrial OS=Mus musculus OX=10090 GN=Gfm2 PE=1 SV=1;sp|Q8R2Q4|RRF2M_MOUSE Ribosome-releasing factor 2, mitochondrial OS=Mus musculus OX=10090 GN=Gfm2 PE=1 SV=2;tr|Q3TML3|Q3TML3_MOUSE Uncharacterized	E9Q7N5	Gfm2 EFG2 GFM2	Ribosome-releasing factor 2, mitochondrial (RRF2mt) (Elongation factor G 2, mitochondrial) (EF-G2mt) (mEF-G 2)	7	8	8	15.4	82.025	31141000	29496000	29815000	57241000	42078000	43198000	1.57561	0.0240412
sp|Q9ESP1|SDF2L_MOUSE	sp|Q9ESP1|SDF2L_MOUSE	sp|Q9ESP1|SDF2L_MOUSE Stromal cell-derived factor 2-like protein 1 OS=Mus musculus OX=10090 GN=Sdf2l1 PE=1 SV=2	Q9ESP1	Sdf2l1	Stromal cell-derived factor 2-like protein 1 (SDF2-like protein 1)	1	6	6	47.5	23.648	130980000	121590000	121270000	108000000	111640000	97231000	0.847611	0.0241193
tr|Q3TCL6|Q3TCL6_MOUSE;sp|Q6DFX2|ANTR2_MOUSE;tr|A0A0G2JE26|A0A0G2JE26_MOUSE;tr|C6EQH0|C6EQH0_MOUSE	tr|Q3TCL6|Q3TCL6_MOUSE;sp|Q6DFX2|ANTR2_MOUSE;tr|A0A0G2JE26|A0A0G2JE26_MOUSE;tr|C6EQH0|C6EQH0_MOUSE	tr|Q3TCL6|Q3TCL6_MOUSE Anthrax toxin receptor OS=Mus musculus OX=10090 GN=Antxr2 PE=1 SV=1;sp|Q6DFX2|ANTR2_MOUSE Anthrax toxin receptor 2 OS=Mus musculus OX=10090 GN=Antxr2 PE=1 SV=1;tr|A0A0G2JE26|A0A0G2JE26_MOUSE Anthrax toxin receptor OS=Mus musculus OX=	Q3TCL6	Antxr2	Anthrax toxin receptor	4	4	4	14.4	53.184	69067000	61378000	58989000	43222000	31779000	49880000	0.659232	0.0242585
tr|F6RPJ9|F6RPJ9_MOUSE;tr|Q8CGB9|Q8CGB9_MOUSE;sp|Q9JHR7|IDE_MOUSE	tr|F6RPJ9|F6RPJ9_MOUSE;tr|Q8CGB9|Q8CGB9_MOUSE;sp|Q9JHR7|IDE_MOUSE	tr|F6RPJ9|F6RPJ9_MOUSE Insulin-degrading enzyme (Fragment) OS=Mus musculus OX=10090 GN=Ide PE=1 SV=1;tr|Q8CGB9|Q8CGB9_MOUSE Insulin degrading enzyme OS=Mus musculus OX=10090 GN=Ide PE=2 SV=1;sp|Q9JHR7|IDE_MOUSE Insulin-degrading enzyme OS=Mus musculus OX=1	F6RPJ9	Ide	Insulin-degrading enzyme (Fragment)	3	13	13	15.8	114.15	80060000	89481000	94613000	70668000	70163000	75170000	0.817709	0.0242635
tr|A0A087WNM1|A0A087WNM1_MOUSE;sp|Q91Z67|SRGP2_MOUSE;tr|A0A2X0SZ45|A0A2X0SZ45_MOUSE;tr|A0A087WSQ1|A0A087WSQ1_MOUSE;tr|A0A087WRV4|A0A087WRV4_MOUSE;tr|Q3UPB8|Q3UPB8_MOUSE;tr|A0A087WS59|A0A087WS59_MOUSE;tr|A0A087WNR5|A0A087WNR5_MOUSE;sp|Q91Z69|SRGP1_MOUSE;tr|D3YZW1|D3YZW1_MOUSE	tr|A0A087WNM1|A0A087WNM1_MOUSE;sp|Q91Z67|SRGP2_MOUSE;tr|A0A2X0SZ45|A0A2X0SZ45_MOUSE;tr|A0A087WSQ1|A0A087WSQ1_MOUSE	tr|A0A087WNM1|A0A087WNM1_MOUSE SLIT-ROBO Rho GTPase-activating protein 2 OS=Mus musculus OX=10090 GN=Srgap2 PE=1 SV=1;sp|Q91Z67|SRGP2_MOUSE SLIT-ROBO Rho GTPase-activating protein 2 OS=Mus musculus OX=10090 GN=Srgap2 PE=1 SV=2;tr|A0A2X0SZ45|A0A2X0SZ45_MOUS	A0A087WNM1	Srgap2	SLIT-ROBO Rho GTPase-activating protein 2	10	7	7	10.3	98.278	27688000	26744000	22348000	18597000	17931000	20726000	0.745689	0.0244361
sp|Q3UFM5|NOM1_MOUSE	sp|Q3UFM5|NOM1_MOUSE	sp|Q3UFM5|NOM1_MOUSE Nucleolar MIF4G domain-containing protein 1 OS=Mus musculus OX=10090 GN=Nom1 PE=1 SV=2	Q3UFM5	Nom1 Gm1040	Nucleolar MIF4G domain-containing protein 1 (SGD1 homolog)	1	11	11	18.4	95.959	41800000	42425000	48604000	58645000	51018000	56059000	1.24763	0.0245595
sp|Q80U93|NU214_MOUSE;tr|Q8CHS9|Q8CHS9_MOUSE;tr|Q3UBL1|Q3UBL1_MOUSE;tr|Q3TLG4|Q3TLG4_MOUSE;tr|A0A0A6YW83|A0A0A6YW83_MOUSE	sp|Q80U93|NU214_MOUSE;tr|Q8CHS9|Q8CHS9_MOUSE	sp|Q80U93|NU214_MOUSE Nuclear pore complex protein Nup214 OS=Mus musculus OX=10090 GN=Nup214 PE=1 SV=2;tr|Q8CHS9|Q8CHS9_MOUSE Nup214 protein OS=Mus musculus OX=10090 GN=Nup214 PE=2 SV=2	Q80U93	Nup214 Kiaa0023	Nuclear pore complex protein Nup214 (214 kDa nucleoporin) (Nucleoporin Nup214)	5	24	24	17.5	212.98	334610000	308760000	330510000	286880000	293080000	300210000	0.903777	0.024658
sp|Q9D0M2|CDCA7_MOUSE;tr|A2AR39|A2AR39_MOUSE	sp|Q9D0M2|CDCA7_MOUSE	sp|Q9D0M2|CDCA7_MOUSE Cell division cycle-associated protein 7 OS=Mus musculus OX=10090 GN=Cdca7 PE=1 SV=1	Q9D0M2	Cdca7	Cell division cycle-associated protein 7	2	7	6	30.6	43.837	42789000	NaN	41726000	34531000	34698000	38098000	0.846611	0.0249918
tr|Q6XLQ8|Q6XLQ8_MOUSE;tr|Q3TL33|Q3TL33_MOUSE	tr|Q6XLQ8|Q6XLQ8_MOUSE;tr|Q3TL33|Q3TL33_MOUSE	tr|Q6XLQ8|Q6XLQ8_MOUSE Calumenin OS=Mus musculus OX=10090 GN=Calu PE=1 SV=1;tr|Q3TL33|Q3TL33_MOUSE Uncharacterized protein OS=Mus musculus OX=10090 GN=Calu PE=2 SV=1	Q6XLQ8	Calu mCG_9131	Calumenin (Calumenin, isoform CRA_b) (Cardiac calumenin isoform)	2	20	3	64.8	37.117	334090000	345230000	362620000	239310000	298350000	291240000	0.795535	0.0252349
tr|Q8C2E0|Q8C2E0_MOUSE;tr|D1MQ07|D1MQ07_MOUSE;sp|O89109|KCNN4_MOUSE	tr|Q8C2E0|Q8C2E0_MOUSE;tr|D1MQ07|D1MQ07_MOUSE;sp|O89109|KCNN4_MOUSE	tr|Q8C2E0|Q8C2E0_MOUSE Uncharacterized protein (Fragment) OS=Mus musculus OX=10090 GN=Kcnn4 PE=2 SV=1;tr|D1MQ07|D1MQ07_MOUSE Potassium intermediate/small conductance calcium-activated channel, subfamily N, member 4, isoform CRA_a OS=Mus musculus OX=10090 G	Q8C2E0	Kcnn4	CaMBD domain-containing protein (Fragment)	3	1	1	20.2	14.452	NaN	4816400	4969900	NaN	6028700	6437200	1.27381	0.0255114
sp|Q6P1H6|ANKL2_MOUSE	sp|Q6P1H6|ANKL2_MOUSE	sp|Q6P1H6|ANKL2_MOUSE Ankyrin repeat and LEM domain-containing protein 2 OS=Mus musculus OX=10090 GN=Ankle2 PE=1 SV=2	Q6P1H6	Ankle2 D5Ertd585e Kiaa0692 Lem4	Ankyrin repeat and LEM domain-containing protein 2 (LEM domain-containing protein 4)	1	12	12	18.2	106.2	61121000	62469000	63460000	59153000	54936000	58056000	0.920315	0.0256825
sp|Q8C052|MAP1S_MOUSE;tr|B2RWW1|B2RWW1_MOUSE;tr|A0A1D5RLY6|A0A1D5RLY6_MOUSE	sp|Q8C052|MAP1S_MOUSE;tr|B2RWW1|B2RWW1_MOUSE;tr|A0A1D5RLY6|A0A1D5RLY6_MOUSE	sp|Q8C052|MAP1S_MOUSE Microtubule-associated protein 1S OS=Mus musculus OX=10090 GN=Map1s PE=1 SV=2;tr|B2RWW1|B2RWW1_MOUSE Microtubule-associated protein 1S OS=Mus musculus OX=10090 GN=Map1s PE=2 SV=1;tr|A0A1D5RLY6|A0A1D5RLY6_MOUSE Microtubule-associated p	Q8C052	Map1s Bpy2ip1 Map8 Mtap1s	Microtubule-associated protein 1S (MAP-1S) (BPY2-interacting protein 1) (Microtubule-associated protein 8) [Cleaved into: MAP1S heavy chain; MAP1S light chain]	3	10	10	15.6	102.94	37934000	39815000	35720000	51126000	45973000	43277000	1.23713	0.0257124
tr|Q1XID4|Q1XID4_MOUSE;sp|Q9CYN9|RENR_MOUSE	tr|Q1XID4|Q1XID4_MOUSE;sp|Q9CYN9|RENR_MOUSE	tr|Q1XID4|Q1XID4_MOUSE Renin/prorenin receptor OS=Mus musculus OX=10090 GN=Atp6ap2 PE=1 SV=2;sp|Q9CYN9|RENR_MOUSE Renin receptor OS=Mus musculus OX=10090 GN=Atp6ap2 PE=1 SV=2	Q1XID4	Atp6ap2	Renin/prorenin receptor	2	7	7	25.4	39.091	95383000	95913000	81293000	76667000	70567000	65723000	0.781238	0.0257445
tr|Q14AC7|Q14AC7_MOUSE;sp|P61211|ARL1_MOUSE;tr|F8WIB1|F8WIB1_MOUSE;tr|Q9D7H9|Q9D7H9_MOUSE;tr|Q3TIR2|Q3TIR2_MOUSE;tr|Q4V9U3|Q4V9U3_MOUSE;tr|E9Q006|E9Q006_MOUSE	tr|Q14AC7|Q14AC7_MOUSE;sp|P61211|ARL1_MOUSE;tr|F8WIB1|F8WIB1_MOUSE;tr|Q9D7H9|Q9D7H9_MOUSE;tr|Q3TIR2|Q3TIR2_MOUSE	tr|Q14AC7|Q14AC7_MOUSE ADP-ribosylation factor-like 1 OS=Mus musculus OX=10090 GN=Arl1 PE=1 SV=1;sp|P61211|ARL1_MOUSE ADP-ribosylation factor-like protein 1 OS=Mus musculus OX=10090 GN=Arl1 PE=1 SV=1;tr|F8WIB1|F8WIB1_MOUSE ADP-ribosylation factor-like prot	Q14AC7	Arl1 mCG_16774	ADP-ribosylation factor-like 1 (MCG16774, isoform CRA_c)	7	7	7	63.5	20.411	78709000	74539000	86240000	99876000	99917000	89701000	1.2088	0.0259311
sp|Q68FD5|CLH1_MOUSE;tr|Q5SXR6|Q5SXR6_MOUSE;tr|Q80U89|Q80U89_MOUSE;tr|Q3UPJ3|Q3UPJ3_MOUSE;tr|Q3U0H2|Q3U0H2_MOUSE;tr|Q3TYQ2|Q3TYQ2_MOUSE;tr|Q3TAN1|Q3TAN1_MOUSE;tr|Q8K2I5|Q8K2I5_MOUSE;tr|Q3TJ98|Q3TJ98_MOUSE;tr|F6Z1R4|F6Z1R4_MOUSE	sp|Q68FD5|CLH1_MOUSE;tr|Q5SXR6|Q5SXR6_MOUSE;tr|Q80U89|Q80U89_MOUSE;tr|Q3UPJ3|Q3UPJ3_MOUSE	sp|Q68FD5|CLH1_MOUSE Clathrin heavy chain 1 OS=Mus musculus OX=10090 GN=Cltc PE=1 SV=3;tr|Q5SXR6|Q5SXR6_MOUSE Clathrin heavy chain OS=Mus musculus OX=10090 GN=Cltc PE=1 SV=1;tr|Q80U89|Q80U89_MOUSE MKIAA0034 protein (Fragment) OS=Mus musculus OX=10090 GN=mK	Q68FD5	Cltc	Clathrin heavy chain 1	10	84	84	60.2	191.55	6931200000	6934400000	6722700000	6314500000	6414100000	6636400000	0.940583	0.0260223
tr|A2A5N2|A2A5N2_MOUSE;sp|Q9CQV8|1433B_MOUSE;tr|A2A5N1|A2A5N1_MOUSE	tr|A2A5N2|A2A5N2_MOUSE;sp|Q9CQV8|1433B_MOUSE;tr|A2A5N1|A2A5N1_MOUSE	tr|A2A5N2|A2A5N2_MOUSE Tyrosine 3-monooxygenase/tryptophan 5-monooxygenase activation protein, beta polypeptide OS=Mus musculus OX=10090 GN=Ywhab PE=2 SV=1;sp|Q9CQV8|1433B_MOUSE 14-3-3 protein beta/alpha OS=Mus musculus OX=10090 GN=Ywhab PE=1 SV=3;tr|A2A5N	A2A5N2	Ywhab mCG_5429	Tyrosine 3-monooxygenase/tryptophan 5-monooxygenase activation protein, beta polypeptide (Tyrosine 3-monooxygenase/tryptophan 5-monooxygenase activation protein, beta polypeptide, isoform CRA_c)	3	16	8	68.3	28.086	339760000	365930000	397230000	309380000	251420000	294050000	0.775079	0.0262077
sp|Q99JR8|SMRD2_MOUSE;tr|Q3TXH6|Q3TXH6_MOUSE;tr|Q3TM59|Q3TM59_MOUSE;tr|G3UXC0|G3UXC0_MOUSE;tr|A0A0G2JG60|A0A0G2JG60_MOUSE;sp|Q6P9Z1|SMRD3_MOUSE;tr|A0A2R8VHB7|A0A2R8VHB7_MOUSE;tr|A0A2R8VI28|A0A2R8VI28_MOUSE	sp|Q99JR8|SMRD2_MOUSE;tr|Q3TXH6|Q3TXH6_MOUSE;tr|Q3TM59|Q3TM59_MOUSE;tr|G3UXC0|G3UXC0_MOUSE	sp|Q99JR8|SMRD2_MOUSE SWI/SNF-related matrix-associated actin-dependent regulator of chromatin subfamily D member 2 OS=Mus musculus OX=10090 GN=Smarcd2 PE=1 SV=2;tr|Q3TXH6|Q3TXH6_MOUSE Uncharacterized protein OS=Mus musculus OX=10090 GN=Smarcd2 PE=2 SV=1;t	Q99JR8	Smarcd2 Baf60b	SWI/SNF-related matrix-associated actin-dependent regulator of chromatin subfamily D member 2 (60 kDa BRG-1/Brm-associated factor subunit B) (BRG1-associated factor 60B) (BAF60B)	8	13	12	33.1	59.084	125380000	131120000	122490000	159760000	139140000	147190000	1.17705	0.0264469
sp|Q5U462|CDCP1_MOUSE;tr|A0A172Q395|A0A172Q395_MOUSE;tr|Q05D42|Q05D42_MOUSE	sp|Q5U462|CDCP1_MOUSE;tr|A0A172Q395|A0A172Q395_MOUSE;tr|Q05D42|Q05D42_MOUSE	sp|Q5U462|CDCP1_MOUSE CUB domain-containing protein 1 OS=Mus musculus OX=10090 GN=Cdcp1 PE=2 SV=1;tr|A0A172Q395|A0A172Q395_MOUSE CUB domain-containing protein 1 (Fragment) OS=Mus musculus OX=10090 GN=Cdcp1 PE=2 SV=1;tr|Q05D42|Q05D42_MOUSE Cdcp1 protein (Fr	Q5U462	Cdcp1	CUB domain-containing protein 1 (Membrane glycoprotein gp140) (Transmembrane and associated with src kinases) (CD antigen CD318)	3	13	13	20.4	92.725	95221000	88562000	88661000	100790000	101710000	97017000	1.09937	0.0264998
tr|A0A0G2JFY0|A0A0G2JFY0_MOUSE;tr|A0A0A0MQ80|A0A0A0MQ80_MOUSE;tr|B7ZNK9|B7ZNK9_MOUSE;sp|Q3UMC0|AFG2H_MOUSE;tr|D3Z0U5|D3Z0U5_MOUSE;tr|D6RGM7|D6RGM7_MOUSE;tr|A0A0E4D027|A0A0E4D027_MOUSE;tr|A0A0E4HJ81|A0A0E4HJ81_MOUSE;tr|D3Z4J2|D3Z4J2_MOUSE;tr|A0A0E3WJP9|A0A0E3WJP9_MOUSE;tr|A0A0E4D014|A0A0E4D014_MOUSE;tr|A0A0E4HEY7|A0A0E4HEY7_MOUSE;sp|Q9D3R6|KATL2_MOUSE	tr|A0A0G2JFY0|A0A0G2JFY0_MOUSE;tr|A0A0A0MQ80|A0A0A0MQ80_MOUSE;tr|B7ZNK9|B7ZNK9_MOUSE;sp|Q3UMC0|AFG2H_MOUSE	tr|A0A0G2JFY0|A0A0G2JFY0_MOUSE ATPase family protein 2 homolog OS=Mus musculus OX=10090 GN=Spata5 PE=1 SV=1;tr|A0A0A0MQ80|A0A0A0MQ80_MOUSE ATPase family protein 2 homolog OS=Mus musculus OX=10090 GN=Spata5 PE=1 SV=1;tr|B7ZNK9|B7ZNK9_MOUSE Spata5 protein OS	A0A0G2JFY0	Spata5	ATPase family protein 2 homolog	13	10	10	18.5	91.287	95892000	92420000	108850000	121710000	113110000	120950000	1.19723	0.0266779
sp|Q9D0G0|RT30_MOUSE	sp|Q9D0G0|RT30_MOUSE	sp|Q9D0G0|RT30_MOUSE 28S ribosomal protein S30, mitochondrial OS=Mus musculus OX=10090 GN=Mrps30 PE=1 SV=1	Q9D0G0	Mrps30	28S ribosomal protein S30, mitochondrial (MRP-S30) (S30mt)	1	15	15	46.4	49.939	203740000	187140000	164870000	240300000	233260000	217290000	1.24309	0.0267194
tr|Q14AR0|Q14AR0_MOUSE;sp|Q9D8T7|SLIRP_MOUSE;tr|F8WHU8|F8WHU8_MOUSE;tr|F7DE82|F7DE82_MOUSE	tr|Q14AR0|Q14AR0_MOUSE;sp|Q9D8T7|SLIRP_MOUSE;tr|F8WHU8|F8WHU8_MOUSE;tr|F7DE82|F7DE82_MOUSE	tr|Q14AR0|Q14AR0_MOUSE RIKEN cDNA 1810035L17, isoform CRA_a OS=Mus musculus OX=10090 GN=Slirp PE=2 SV=1;sp|Q9D8T7|SLIRP_MOUSE SRA stem-loop-interacting RNA-binding protein, mitochondrial OS=Mus musculus OX=10090 GN=Slirp PE=1 SV=2;tr|F8WHU8|F8WHU8_MOUSE SR	Q14AR0	Slirp 1810035L17Rik mCG_17469	RIKEN cDNA 1810035L17, isoform CRA_a	4	5	5	55.4	12.605	337380000	357900000	362360000	304060000	329590000	314510000	0.896487	0.0268593
sp|Q9D7N6|RM30_MOUSE;tr|A0A0A6YXW4|A0A0A6YXW4_MOUSE	sp|Q9D7N6|RM30_MOUSE;tr|A0A0A6YXW4|A0A0A6YXW4_MOUSE	sp|Q9D7N6|RM30_MOUSE 39S ribosomal protein L30, mitochondrial OS=Mus musculus OX=10090 GN=Mrpl30 PE=1 SV=1;tr|A0A0A6YXW4|A0A0A6YXW4_MOUSE 39S ribosomal protein L30, mitochondrial (Fragment) OS=Mus musculus OX=10090 GN=Mrpl30 PE=1 SV=1	Q9D7N6	Mrpl30	39S ribosomal protein L30, mitochondrial (L30mt) (MRP-L30)	2	5	5	43.1	18.342	54635000	57497000	55576000	64100000	63228000	58920000	1.11055	0.0268824
tr|E5D6T0|E5D6T0_MOUSE;tr|E9Q6A7|E9Q6A7_MOUSE;tr|A2A655|A2A655_MOUSE;tr|A2A654|A2A654_MOUSE;tr|Q8CFX5|Q8CFX5_MOUSE;tr|Q3UPA6|Q3UPA6_MOUSE;tr|Q8K092|Q8K092_MOUSE;tr|Q6P9L3|Q6P9L3_MOUSE;tr|A2A653|A2A653_MOUSE;tr|A2A652|A2A652_MOUSE;tr|Q8VDN7|Q8VDN7_MOUSE;tr|Q3TMJ3|Q3TMJ3_MOUSE	tr|E5D6T0|E5D6T0_MOUSE;tr|E9Q6A7|E9Q6A7_MOUSE;tr|A2A655|A2A655_MOUSE;tr|A2A654|A2A654_MOUSE	tr|E5D6T0|E5D6T0_MOUSE Bromodomain PHD finger transcription factor splice variant OS=Mus musculus OX=10090 GN=Bptf PE=2 SV=1;tr|E9Q6A7|E9Q6A7_MOUSE Bromodomain PHD finger transcription factor OS=Mus musculus OX=10090 GN=Bptf PE=1 SV=1;tr|A2A655|A2A655_MOUS	E5D6T0	Bptf	Bromodomain PHD finger transcription factor splice variant	12	15	15	7.6	291.86	108230000	121000000	108920000	85759000	100610000	85797000	0.804868	0.0270612
tr|A0A183ZRM3|A0A183ZRM3_MOUSE;sp|Q4PZA2|ECE1_MOUSE;tr|Q3TUZ3|Q3TUZ3_MOUSE;tr|B1AXF8|B1AXF8_MOUSE	tr|A0A183ZRM3|A0A183ZRM3_MOUSE;sp|Q4PZA2|ECE1_MOUSE	tr|A0A183ZRM3|A0A183ZRM3_MOUSE Endothelin-converting enzyme-1c2 OS=Mus musculus OX=10090 GN=Ece1 PE=4 SV=1;sp|Q4PZA2|ECE1_MOUSE Endothelin-converting enzyme 1 OS=Mus musculus OX=10090 GN=Ece1 PE=1 SV=1	A0A183ZRM3	Ece1	Endothelin-converting enzyme-1c2	4	11	11	20.8	85.462	173140000	154160000	141650000	120710000	116700000	129880000	0.783218	0.0271394
sp|P27661|H2AX_MOUSE	sp|P27661|H2AX_MOUSE	sp|P27661|H2AX_MOUSE Histone H2AX OS=Mus musculus OX=10090 GN=H2afx PE=1 SV=2	P27661	H2afx H2a.x H2ax Hist5-2ax	Histone H2AX (H2a/x) (Histone H2A.X)	1	8	2	44.1	15.142	19780000000	22574000000	19309000000	15854000000	16637000000	17599000000	0.812319	0.0274619
tr|Q3TFP0|Q3TFP0_MOUSE;tr|Q3UDH7|Q3UDH7_MOUSE;tr|Q3UA07|Q3UA07_MOUSE;sp|Q9R0U0|SRS10_MOUSE;tr|Q3UYX6|Q3UYX6_MOUSE;tr|Q3UXS8|Q3UXS8_MOUSE;tr|A3KG57|A3KG57_MOUSE;tr|Q8CF51|Q8CF51_MOUSE	tr|Q3TFP0|Q3TFP0_MOUSE;tr|Q3UDH7|Q3UDH7_MOUSE;tr|Q3UA07|Q3UA07_MOUSE;sp|Q9R0U0|SRS10_MOUSE;tr|Q3UYX6|Q3UYX6_MOUSE;tr|Q3UXS8|Q3UXS8_MOUSE	tr|Q3TFP0|Q3TFP0_MOUSE Serine/arginine-rich-splicing factor 10 OS=Mus musculus OX=10090 GN=Srsf10 PE=1 SV=1;tr|Q3UDH7|Q3UDH7_MOUSE Uncharacterized protein OS=Mus musculus OX=10090 GN=Srsf10 PE=2 SV=1;tr|Q3UA07|Q3UA07_MOUSE Uncharacterized protein OS=Mus mu	Q3TFP0	Srsf10 Fusip1 Sfrs13a Srsf13a	Serine/arginine-rich-splicing factor 10	8	8	8	34.6	22.135	264060000	267150000	247160000	233230000	223180000	240560000	0.895422	0.027471
tr|G5E8R2|G5E8R2_MOUSE	tr|G5E8R2|G5E8R2_MOUSE	tr|G5E8R2|G5E8R2_MOUSE Tropomyosin 1, alpha, isoform CRA_k OS=Mus musculus OX=10090 GN=Tpm1 PE=1 SV=1	G5E8R2	Tpm1 mCG_1234	Tropomyosin 1, alpha, isoform CRA_k (Tropomyosin alpha-1 chain)	1	27	0	75.8	28.696	216950000	225260000	223180000	244000000	260160000	284980000	1.18598	0.027588
sp|Q6P9J9|ANO6_MOUSE;tr|A0A2I3BPX3|A0A2I3BPX3_MOUSE;tr|A0A2I3BPY8|A0A2I3BPY8_MOUSE;tr|A0A2I3BRD2|A0A2I3BRD2_MOUSE	sp|Q6P9J9|ANO6_MOUSE;tr|A0A2I3BPX3|A0A2I3BPX3_MOUSE;tr|A0A2I3BPY8|A0A2I3BPY8_MOUSE	sp|Q6P9J9|ANO6_MOUSE Anoctamin-6 OS=Mus musculus OX=10090 GN=Ano6 PE=1 SV=1;tr|A0A2I3BPX3|A0A2I3BPX3_MOUSE Anoctamin OS=Mus musculus OX=10090 GN=Ano6 PE=1 SV=1;tr|A0A2I3BPY8|A0A2I3BPY8_MOUSE Anoctamin OS=Mus musculus OX=10090 GN=Ano6 PE=1 SV=1	Q6P9J9	Ano6 Tmem16f	Anoctamin-6 (Small-conductance calcium-activated nonselective cation channel) (SCAN channel) (Transmembrane protein 16F)	4	14	14	21.5	106.25	249510000	267620000	243860000	289730000	298780000	337160000	1.2164	0.0276148
sp|Q8BZR9|NCBP3_MOUSE;tr|Q7TPS9|Q7TPS9_MOUSE;tr|Q3TLD7|Q3TLD7_MOUSE	sp|Q8BZR9|NCBP3_MOUSE;tr|Q7TPS9|Q7TPS9_MOUSE;tr|Q3TLD7|Q3TLD7_MOUSE	sp|Q8BZR9|NCBP3_MOUSE Nuclear cap-binding protein subunit 3 OS=Mus musculus OX=10090 GN=Ncbp3 PE=1 SV=1;tr|Q7TPS9|Q7TPS9_MOUSE 1200014J11Rik protein (Fragment) OS=Mus musculus OX=10090 GN=Ncbp3 PE=2 SV=1;tr|Q3TLD7|Q3TLD7_MOUSE Uncharacterized protein (Frag	Q8BZR9	Ncbp3	Nuclear cap-binding protein subunit 3	3	11	11	21.3	70.042	133860000	131950000	114670000	146320000	150570000	146970000	1.16658	0.027706
tr|E9PUA5|E9PUA5_MOUSE;tr|A0A068BFR6|A0A068BFR6_MOUSE;sp|Q9QWT9|KIFC1_MOUSE;tr|Q5BJ94|Q5BJ94_MOUSE;tr|Q810Z7|Q810Z7_MOUSE;tr|Q9JKY9|Q9JKY9_MOUSE;tr|G3UXN2|G3UXN2_MOUSE	tr|E9PUA5|E9PUA5_MOUSE;tr|A0A068BFR6|A0A068BFR6_MOUSE;sp|Q9QWT9|KIFC1_MOUSE;tr|Q5BJ94|Q5BJ94_MOUSE	tr|E9PUA5|E9PUA5_MOUSE Kinesin-like protein OS=Mus musculus OX=10090 GN=Kifc5b PE=1 SV=1;tr|A0A068BFR6|A0A068BFR6_MOUSE Kinesin-like protein OS=Mus musculus OX=10090 GN=Kifc1 PE=2 SV=1;sp|Q9QWT9|KIFC1_MOUSE Kinesin-like protein KIFC1 OS=Mus musculus OX=100	E9PUA5	Kifc5b	Kinesin-like protein	7	8	8	15.6	73.681	42992000	41583000	44967000	48761000	54923000	48831000	1.17734	0.0278012
sp|Q9JM76|ARPC3_MOUSE;tr|H7BWZ3|H7BWZ3_MOUSE;tr|A0A0G2JFK7|A0A0G2JFK7_MOUSE;tr|D3Z2F7|D3Z2F7_MOUSE;tr|D3Z2F8|D3Z2F8_MOUSE	sp|Q9JM76|ARPC3_MOUSE;tr|H7BWZ3|H7BWZ3_MOUSE;tr|A0A0G2JFK7|A0A0G2JFK7_MOUSE;tr|D3Z2F7|D3Z2F7_MOUSE;tr|D3Z2F8|D3Z2F8_MOUSE	sp|Q9JM76|ARPC3_MOUSE Actin-related protein 2/3 complex subunit 3 OS=Mus musculus OX=10090 GN=Arpc3 PE=1 SV=3;tr|H7BWZ3|H7BWZ3_MOUSE Actin-related protein 2/3 complex subunit 3 OS=Mus musculus OX=10090 GN=Arpc3 PE=1 SV=1;tr|A0A0G2JFK7|A0A0G2JFK7_MOUSE Acti	Q9JM76	Arpc3	Actin-related protein 2/3 complex subunit 3 (Arp2/3 complex 21 kDa subunit) (p21-ARC)	5	9	9	55.1	20.524	412360000	427160000	368680000	329660000	333960000	352730000	0.84121	0.0278289
tr|B6YY24|B6YY24_MOUSE;sp|Q3UVG3|F91A1_MOUSE	tr|B6YY24|B6YY24_MOUSE;sp|Q3UVG3|F91A1_MOUSE	tr|B6YY24|B6YY24_MOUSE DNA segment, Chr 15, ERATO Doi 621, expressed, isoform CRA_a OS=Mus musculus OX=10090 GN=Fam91a1 PE=1 SV=1;sp|Q3UVG3|F91A1_MOUSE Protein FAM91A1 OS=Mus musculus OX=10090 GN=Fam91a1 PE=1 SV=1	B6YY24	Fam91a1 D15Ertd621e mCG_115519	DNA segment, Chr 15, ERATO Doi 621, expressed, isoform CRA_a (Skeletal muscle cells re-entry induced)	2	8	8	12.7	93.462	64847000	60695000	64248000	59374000	58619000	57279000	0.923505	0.0278769
sp|P34152|FAK1_MOUSE;tr|K7Q751|K7Q751_MOUSE;tr|A0A2I3BRG7|A0A2I3BRG7_MOUSE	sp|P34152|FAK1_MOUSE;tr|K7Q751|K7Q751_MOUSE	sp|P34152|FAK1_MOUSE Focal adhesion kinase 1 OS=Mus musculus OX=10090 GN=Ptk2 PE=1 SV=4;tr|K7Q751|K7Q751_MOUSE Focal ashension kinase 1 OS=Mus musculus OX=10090 GN=Ptk2 PE=2 SV=1	P34152	Ptk2 Fadk Fak Fak1 Kiaa4203	Focal adhesion kinase 1 (FADK 1) (EC 2.7.10.2) (Focal adhesion kinase-related nonkinase) (FRNK) (Protein-tyrosine kinase 2) (p125FAK) (pp125FAK)	3	10	10	14.8	119.24	25221000	27462000	26370000	22747000	24095000	24171000	0.898296	0.0280504
tr|B2RVP5|B2RVP5_MOUSE;sp|Q3THW5|H2AV_MOUSE;sp|P0C0S6|H2AZ_MOUSE;tr|Q8R029|Q8R029_MOUSE;tr|Q3TFU6|Q3TFU6_MOUSE;tr|Q3UA95|Q3UA95_MOUSE;tr|G3UWL7|G3UWL7_MOUSE	tr|B2RVP5|B2RVP5_MOUSE;sp|Q3THW5|H2AV_MOUSE;sp|P0C0S6|H2AZ_MOUSE;tr|Q8R029|Q8R029_MOUSE;tr|Q3TFU6|Q3TFU6_MOUSE;tr|Q3UA95|Q3UA95_MOUSE	tr|B2RVP5|B2RVP5_MOUSE Histone H2A OS=Mus musculus OX=10090 GN=H2afv PE=2 SV=1;sp|Q3THW5|H2AV_MOUSE Histone H2A.V OS=Mus musculus OX=10090 GN=H2afv PE=1 SV=3;sp|P0C0S6|H2AZ_MOUSE Histone H2A.Z OS=Mus musculus OX=10090 GN=H2afz PE=1 SV=2;tr|Q8R029|Q8R029_MO	B2RVP5	H2afv mCG_121516	Histone H2A	7	6	4	53.9	13.509	1809200000	1708900000	1790800000	1455300000	1658100000	1488700000	0.866865	0.0280787
sp|Q8BRG8|TM209_MOUSE;tr|Q8C214|Q8C214_MOUSE;tr|F8WGT2|F8WGT2_MOUSE;tr|A0A0N4SVU6|A0A0N4SVU6_MOUSE;tr|D3YZT2|D3YZT2_MOUSE	sp|Q8BRG8|TM209_MOUSE;tr|Q8C214|Q8C214_MOUSE;tr|F8WGT2|F8WGT2_MOUSE	sp|Q8BRG8|TM209_MOUSE Transmembrane protein 209 OS=Mus musculus OX=10090 GN=Tmem209 PE=2 SV=1;tr|Q8C214|Q8C214_MOUSE Transmembrane protein 209 OS=Mus musculus OX=10090 GN=Tmem209 PE=1 SV=1;tr|F8WGT2|F8WGT2_MOUSE Transmembrane protein 209 OS=Mus musculus OX	Q8BRG8	Tmem209	Transmembrane protein 209	5	11	11	25.8	62.981	155830000	148940000	151860000	135000000	145700000	137950000	0.916825	0.0282139
sp|Q9CPY1|RM51_MOUSE	sp|Q9CPY1|RM51_MOUSE	sp|Q9CPY1|RM51_MOUSE 39S ribosomal protein L51, mitochondrial OS=Mus musculus OX=10090 GN=Mrpl51 PE=1 SV=1	Q9CPY1	Mrpl51 Mrp64	39S ribosomal protein L51, mitochondrial (L51mt) (MRP-L51) (bMRP-64) (bMRP64)	1	2	2	9.4	15.103	17220000	20210000	17298000	15496000	13534000	14221000	0.79029	0.0283766
tr|A0A0U1RPD8|A0A0U1RPD8_MOUSE;tr|Q3UHL0|Q3UHL0_MOUSE;sp|Q8K284|TF3C1_MOUSE;tr|Q3UPZ9|Q3UPZ9_MOUSE;tr|Q3UTP3|Q3UTP3_MOUSE;tr|Q3UQ70|Q3UQ70_MOUSE;tr|Q3UY03|Q3UY03_MOUSE;tr|A0A0U1RP70|A0A0U1RP70_MOUSE;tr|A0A0U1RNK8|A0A0U1RNK8_MOUSE	tr|A0A0U1RPD8|A0A0U1RPD8_MOUSE;tr|Q3UHL0|Q3UHL0_MOUSE;sp|Q8K284|TF3C1_MOUSE;tr|Q3UPZ9|Q3UPZ9_MOUSE;tr|Q3UTP3|Q3UTP3_MOUSE;tr|Q3UQ70|Q3UQ70_MOUSE;tr|Q3UY03|Q3UY03_MOUSE	tr|A0A0U1RPD8|A0A0U1RPD8_MOUSE General transcription factor 3C polypeptide 1 OS=Mus musculus OX=10090 GN=Gtf3c1 PE=1 SV=1;tr|Q3UHL0|Q3UHL0_MOUSE Uncharacterized protein OS=Mus musculus OX=10090 GN=Gtf3c1 PE=2 SV=1;sp|Q8K284|TF3C1_MOUSE General transcriptio	A0A0U1RPD8	Gtf3c1	General transcription factor 3C polypeptide 1	9	12	12	7.7	226.76	37511000	41639000	38734000	48096000	44490000	52990000	1.23491	0.0284119
tr|Q8BTA2|Q8BTA2_MOUSE;tr|A0A1L1SVK0|A0A1L1SVK0_MOUSE;sp|Q61206|PA1B2_MOUSE;tr|A0A1L1SQ76|A0A1L1SQ76_MOUSE;tr|A0A1L1SRD0|A0A1L1SRD0_MOUSE;tr|A0A1L1SQV7|A0A1L1SQV7_MOUSE;tr|A0A1L1SSQ5|A0A1L1SSQ5_MOUSE	tr|Q8BTA2|Q8BTA2_MOUSE;tr|A0A1L1SVK0|A0A1L1SVK0_MOUSE;sp|Q61206|PA1B2_MOUSE;tr|A0A1L1SQ76|A0A1L1SQ76_MOUSE;tr|A0A1L1SRD0|A0A1L1SRD0_MOUSE;tr|A0A1L1SQV7|A0A1L1SQV7_MOUSE	tr|Q8BTA2|Q8BTA2_MOUSE Uncharacterized protein OS=Mus musculus OX=10090 GN=Pafah1b2 PE=2 SV=1;tr|A0A1L1SVK0|A0A1L1SVK0_MOUSE Platelet-activating factor acetylhydrolase IB subunit beta (Fragment) OS=Mus musculus OX=10090 GN=Pafah1b2 PE=1 SV=1;sp|Q61206|PA1B	Q8BTA2	Pafah1b2	SGNH_hydro domain-containing protein	7	3	3	33.8	16.614	26660000	28569000	22167000	17644000	19281000	20113000	0.736963	0.0288248
tr|Q5FWB6|Q5FWB6_MOUSE;tr|Q5M8R8|Q5M8R8_MOUSE;sp|P14869|RLA0_MOUSE;tr|D3YVM5|D3YVM5_MOUSE;tr|S4R1N1|S4R1N1_MOUSE;tr|O89073|O89073_MOUSE	tr|Q5FWB6|Q5FWB6_MOUSE;tr|Q5M8R8|Q5M8R8_MOUSE;sp|P14869|RLA0_MOUSE;tr|D3YVM5|D3YVM5_MOUSE;tr|S4R1N1|S4R1N1_MOUSE	tr|Q5FWB6|Q5FWB6_MOUSE 60S acidic ribosomal protein P0 OS=Mus musculus OX=10090 GN=Rplp0 PE=2 SV=1;tr|Q5M8R8|Q5M8R8_MOUSE 60S acidic ribosomal protein P0 OS=Mus musculus OX=10090 GN=Rplp0 PE=2 SV=1;sp|P14869|RLA0_MOUSE 60S acidic ribosomal protein P0 OS=Mu	Q5FWB6	Rplp0 mCG_17387	60S acidic ribosomal protein P0	6	17	17	58	34.186	3248200000	3168500000	3290800000	3107300000	3130200000	3069500000	0.958743	0.0288435
tr|Q549P2|Q549P2_MOUSE;sp|O70201|BIRC5_MOUSE	tr|Q549P2|Q549P2_MOUSE;sp|O70201|BIRC5_MOUSE	tr|Q549P2|Q549P2_MOUSE Baculoviral IAP repeat-containing 5 transcript variant 1 OS=Mus musculus OX=10090 GN=Birc5 PE=2 SV=1;sp|O70201|BIRC5_MOUSE Baculoviral IAP repeat-containing protein 5 OS=Mus musculus OX=10090 GN=Birc5 PE=1 SV=1	Q549P2	Birc5 Tiap mCG_19311	Baculoviral IAP repeat-containing 5 transcript variant 1 (Inhibitor of apoptosis homolog) (MCG19311, isoform CRA_c) (TIAP)	2	6	6	67.1	16.297	42242000	41156000	41101000	33076000	38447000	36725000	0.869469	0.0290868
sp|Q9ESU6|BRD4_MOUSE;tr|Q3UH70|Q3UH70_MOUSE;tr|B2RSE4|B2RSE4_MOUSE;tr|B0V2V8|B0V2V8_MOUSE;tr|Q3U3Z2|Q3U3Z2_MOUSE;tr|Q3SYK2|Q3SYK2_MOUSE;tr|B0V2V6|B0V2V6_MOUSE;tr|Q63ZX2|Q63ZX2_MOUSE;tr|O35692|O35692_MOUSE;tr|D6RGP2|D6RGP2_MOUSE;tr|Q8BS78|Q8BS78_MOUSE	sp|Q9ESU6|BRD4_MOUSE;tr|Q3UH70|Q3UH70_MOUSE;tr|B2RSE4|B2RSE4_MOUSE;tr|B0V2V8|B0V2V8_MOUSE;tr|Q3U3Z2|Q3U3Z2_MOUSE;tr|Q3SYK2|Q3SYK2_MOUSE;tr|B0V2V6|B0V2V6_MOUSE;tr|Q63ZX2|Q63ZX2_MOUSE	sp|Q9ESU6|BRD4_MOUSE Bromodomain-containing protein 4 OS=Mus musculus OX=10090 GN=Brd4 PE=1 SV=2;tr|Q3UH70|Q3UH70_MOUSE Bromodomain-containing protein 4 OS=Mus musculus OX=10090 GN=Brd4 PE=1 SV=1;tr|B2RSE4|B2RSE4_MOUSE Bromodomain containing 4 OS=Mus muscu	Q9ESU6	Brd4 Mcap	Bromodomain-containing protein 4 (Mitotic chromosome-associated protein) (MCAP)	11	17	11	15.4	155.89	227170000	251290000	236260000	197410000	212490000	215310000	0.874762	0.0291374
tr|G5E8S0|G5E8S0_MOUSE;sp|Q9D4H9|PHF14_MOUSE;tr|F6TN92|F6TN92_MOUSE;tr|Q69ZZ4|Q69ZZ4_MOUSE	tr|G5E8S0|G5E8S0_MOUSE;sp|Q9D4H9|PHF14_MOUSE;tr|F6TN92|F6TN92_MOUSE	tr|G5E8S0|G5E8S0_MOUSE PHD finger protein 14 OS=Mus musculus OX=10090 GN=Phf14 PE=1 SV=1;sp|Q9D4H9|PHF14_MOUSE PHD finger protein 14 OS=Mus musculus OX=10090 GN=Phf14 PE=1 SV=1;tr|F6TN92|F6TN92_MOUSE PHD finger protein 14 (Fragment) OS=Mus musculus OX=1009	G5E8S0	Phf14 mCG_11252	PHD finger protein 14 (PHD finger protein 14, isoform CRA_a)	4	8	8	12.3	99.09	27881000	30918000	34619000	43984000	NaN	54215000	1.57677	0.0292916
tr|V9GXH2|V9GXH2_MOUSE;sp|Q61070|EI24_MOUSE;tr|A0A0R4J250|A0A0R4J250_MOUSE;tr|C3VDI2|C3VDI2_MOUSE;tr|V9GXU0|V9GXU0_MOUSE	tr|V9GXH2|V9GXH2_MOUSE;sp|Q61070|EI24_MOUSE;tr|A0A0R4J250|A0A0R4J250_MOUSE;tr|C3VDI2|C3VDI2_MOUSE;tr|V9GXU0|V9GXU0_MOUSE	tr|V9GXH2|V9GXH2_MOUSE Etoposide-induced protein 2.4 (Fragment) OS=Mus musculus OX=10090 GN=Ei24 PE=1 SV=1;sp|Q61070|EI24_MOUSE Etoposide-induced protein 2.4 OS=Mus musculus OX=10090 GN=Ei24 PE=1 SV=3;tr|A0A0R4J250|A0A0R4J250_MOUSE Etoposide induced 2.4 mR	V9GXH2	Ei24	Etoposide-induced protein 2.4 (Fragment)	5	2	2	10.5	20.799	111170000	102690000	91930000	70764000	NaN	49905000	0.591921	0.029351
sp|P40336|VP26A_MOUSE;tr|Q6PE78|Q6PE78_MOUSE;tr|A0A1W2P7Z9|A0A1W2P7Z9_MOUSE;tr|A0A1W2P7R7|A0A1W2P7R7_MOUSE	sp|P40336|VP26A_MOUSE;tr|Q6PE78|Q6PE78_MOUSE	sp|P40336|VP26A_MOUSE Vacuolar protein sorting-associated protein 26A OS=Mus musculus OX=10090 GN=Vps26a PE=1 SV=1;tr|Q6PE78|Q6PE78_MOUSE Vacuolar protein sorting 26 homolog A (Yeast), isoform CRA_e OS=Mus musculus OX=10090 GN=Vps26a PE=2 SV=1	P40336	Vps26a Vps26	Vacuolar protein sorting-associated protein 26A (H<beta>58 protein) (H beta 58) (Vesicle protein sorting 26A) (mVPS26)	4	7	7	28.1	38.113	55501000	59569000	66143000	75892000	71070000	84849000	1.27922	0.0295572
tr|Q3UJ84|Q3UJ84_MOUSE;tr|Q3U417|Q3U417_MOUSE;sp|Q8C8U0|LIPB1_MOUSE;tr|A0A0N4SUZ5|A0A0N4SUZ5_MOUSE;tr|F6YZ95|F6YZ95_MOUSE;tr|F7CUU8|F7CUU8_MOUSE;tr|F6S1C4|F6S1C4_MOUSE;tr|Q6IQY8|Q6IQY8_MOUSE;tr|A0A0N4SVG3|A0A0N4SVG3_MOUSE;tr|G3X957|G3X957_MOUSE;sp|O35711|LIPB2_MOUSE	tr|Q3UJ84|Q3UJ84_MOUSE;tr|Q3U417|Q3U417_MOUSE;sp|Q8C8U0|LIPB1_MOUSE	tr|Q3UJ84|Q3UJ84_MOUSE Uncharacterized protein OS=Mus musculus OX=10090 GN=Ppfibp1 PE=2 SV=1;tr|Q3U417|Q3U417_MOUSE Uncharacterized protein OS=Mus musculus OX=10090 GN=Ppfibp1 PE=2 SV=1;sp|Q8C8U0|LIPB1_MOUSE Liprin-beta-1 OS=Mus musculus OX=10090 GN=Ppfibp	Q3UJ84	Ppfibp1	Uncharacterized protein	11	14	14	22.2	108.52	52614000	52501000	54392000	63855000	59265000	57077000	1.12971	0.0298913
tr|A0A2I3BRW0|A0A2I3BRW0_MOUSE;sp|Q9D958|SPCS1_MOUSE;tr|A0A2I3BQG3|A0A2I3BQG3_MOUSE	tr|A0A2I3BRW0|A0A2I3BRW0_MOUSE;sp|Q9D958|SPCS1_MOUSE	tr|A0A2I3BRW0|A0A2I3BRW0_MOUSE Signal peptidase complex subunit 1 OS=Mus musculus OX=10090 GN=Spcs1 PE=1 SV=1;sp|Q9D958|SPCS1_MOUSE Signal peptidase complex subunit 1 OS=Mus musculus OX=10090 GN=Spcs1 PE=2 SV=3	A0A2I3BRW0	Spcs1	Signal peptidase complex subunit 1	3	3	3	27.5	11.777	156090000	174290000	147560000	189470000	191710000	181080000	1.17642	0.0299739
tr|Q3TFA9|Q3TFA9_MOUSE;sp|Q9JHJ0|TMOD3_MOUSE;tr|Q8C3Z3|Q8C3Z3_MOUSE;tr|A0A1L1SQ12|A0A1L1SQ12_MOUSE;tr|A0A1L1SR42|A0A1L1SR42_MOUSE;tr|A0A1L1SU70|A0A1L1SU70_MOUSE;sp|Q9JKK7|TMOD2_MOUSE;sp|P49813|TMOD1_MOUSE	tr|Q3TFA9|Q3TFA9_MOUSE;sp|Q9JHJ0|TMOD3_MOUSE;tr|Q8C3Z3|Q8C3Z3_MOUSE	tr|Q3TFA9|Q3TFA9_MOUSE Uncharacterized protein OS=Mus musculus OX=10090 GN=Tmod3 PE=2 SV=1;sp|Q9JHJ0|TMOD3_MOUSE Tropomodulin-3 OS=Mus musculus OX=10090 GN=Tmod3 PE=1 SV=1;tr|Q8C3Z3|Q8C3Z3_MOUSE Uncharacterized protein (Fragment) OS=Mus musculus OX=10090 G	Q3TFA9	Tmod3	Uncharacterized protein	8	15	15	47.7	39.472	566980000	568490000	553970000	525740000	535500000	548560000	0.95286	0.0300968
sp|Q6DFW4|NOP58_MOUSE;tr|A0A0A0MQ76|A0A0A0MQ76_MOUSE;tr|A0A087WQ46|A0A087WQ46_MOUSE;tr|A0A087WSU5|A0A087WSU5_MOUSE;tr|A0A087WSL8|A0A087WSL8_MOUSE;tr|A0A087WP00|A0A087WP00_MOUSE;tr|A0A087WNW0|A0A087WNW0_MOUSE	sp|Q6DFW4|NOP58_MOUSE;tr|A0A0A0MQ76|A0A0A0MQ76_MOUSE	sp|Q6DFW4|NOP58_MOUSE Nucleolar protein 58 OS=Mus musculus OX=10090 GN=Nop58 PE=1 SV=1;tr|A0A0A0MQ76|A0A0A0MQ76_MOUSE Nucleolar protein 58 OS=Mus musculus OX=10090 GN=Nop58 PE=1 SV=1	Q6DFW4	Nop58 Nol5	Nucleolar protein 58 (MSSP) (Nucleolar protein 5) (SIK-similar protein)	7	26	26	56.9	60.342	2488100000	2708200000	2407700000	2264900000	2210800000	2229600000	0.881812	0.0303722
sp|Q80YR5|SAFB2_MOUSE;tr|Q3UGR1|Q3UGR1_MOUSE;tr|Q6A0C0|Q6A0C0_MOUSE;tr|F6XJ79|F6XJ79_MOUSE;tr|F6Z0Y5|F6Z0Y5_MOUSE;tr|D6RHP9|D6RHP9_MOUSE;tr|F6WIZ2|F6WIZ2_MOUSE;tr|D6RJ78|D6RJ78_MOUSE;tr|Q3B844|Q3B844_MOUSE;tr|F6VRR0|F6VRR0_MOUSE;tr|F6R703|F6R703_MOUSE	sp|Q80YR5|SAFB2_MOUSE;tr|Q3UGR1|Q3UGR1_MOUSE;tr|Q6A0C0|Q6A0C0_MOUSE	sp|Q80YR5|SAFB2_MOUSE Scaffold attachment factor B2 OS=Mus musculus OX=10090 GN=Safb2 PE=1 SV=2;tr|Q3UGR1|Q3UGR1_MOUSE Uncharacterized protein (Fragment) OS=Mus musculus OX=10090 GN=Safb2 PE=2 SV=1;tr|Q6A0C0|Q6A0C0_MOUSE MKIAA0138 protein (Fragment) OS=Mus	Q80YR5	Safb2	Scaffold attachment factor B2 (SAF-B2)	11	29	23	37.3	111.84	263570000	258390000	230190000	287790000	285470000	313210000	1.17858	0.0305479
tr|A2RT28|A2RT28_MOUSE;sp|Q499X9|SYMM_MOUSE	tr|A2RT28|A2RT28_MOUSE;sp|Q499X9|SYMM_MOUSE	tr|A2RT28|A2RT28_MOUSE Methionine-tRNA synthetase 2 (Mitochondrial) OS=Mus musculus OX=10090 GN=Mars2 PE=1 SV=1;sp|Q499X9|SYMM_MOUSE Methionine--tRNA ligase, mitochondrial OS=Mus musculus OX=10090 GN=Mars2 PE=1 SV=2	A2RT28	Mars2 mCG_117543	Methionine-tRNA synthetase 2 (Mitochondrial)	2	4	4	10.4	65.804	17509000	17312000	16092000	18237000	19194000	18625000	1.10102	0.0305781
sp|Q99L04|DHRS1_MOUSE;tr|Q3TVU9|Q3TVU9_MOUSE	sp|Q99L04|DHRS1_MOUSE;tr|Q3TVU9|Q3TVU9_MOUSE	sp|Q99L04|DHRS1_MOUSE Dehydrogenase/reductase SDR family member 1 OS=Mus musculus OX=10090 GN=Dhrs1 PE=1 SV=1;tr|Q3TVU9|Q3TVU9_MOUSE Uncharacterized protein OS=Mus musculus OX=10090 GN=Dhrs1 PE=2 SV=1	Q99L04	Dhrs1 D14ertd484e	Dehydrogenase/reductase SDR family member 1 (EC 1.1.-.-)	2	18	18	68.1	34.005	532580000	512810000	496700000	467240000	460780000	486640000	0.917365	0.0305919
tr|Q564E8|Q564E8_MOUSE;sp|Q9D8E6|RL4_MOUSE;tr|Q9CSM5|Q9CSM5_MOUSE;tr|Q5ZEY2|Q5ZEY2_MOUSE	tr|Q564E8|Q564E8_MOUSE;sp|Q9D8E6|RL4_MOUSE;tr|Q9CSM5|Q9CSM5_MOUSE	tr|Q564E8|Q564E8_MOUSE Ribosomal protein L4 OS=Mus musculus OX=10090 GN=Rpl4 PE=1 SV=1;sp|Q9D8E6|RL4_MOUSE 60S ribosomal protein L4 OS=Mus musculus OX=10090 GN=Rpl4 PE=1 SV=3;tr|Q9CSM5|Q9CSM5_MOUSE Uncharacterized protein OS=Mus musculus OX=10090 GN=Rpl4 P	Q564E8	Rpl4 mCG_12784	Ribosomal protein L4	4	27	27	52	47.153	6625800000	5906900000	6190400000	5246800000	5193200000	5701300000	0.862106	0.0310793
sp|Q8C0E2|VP26B_MOUSE	sp|Q8C0E2|VP26B_MOUSE	sp|Q8C0E2|VP26B_MOUSE Vacuolar protein sorting-associated protein 26B OS=Mus musculus OX=10090 GN=Vps26b PE=1 SV=1	Q8C0E2	Vps26b	Vacuolar protein sorting-associated protein 26B (Vesicle protein sorting 26B)	1	7	7	30.4	39.124	46076000	47182000	50057000	53089000	60063000	64399000	1.23889	0.0311054
tr|Q8C2N7|Q8C2N7_MOUSE;sp|P63254|CRIP1_MOUSE;tr|A0A0G2JEK2|A0A0G2JEK2_MOUSE;tr|Q6P3B4|Q6P3B4_MOUSE	tr|Q8C2N7|Q8C2N7_MOUSE;sp|P63254|CRIP1_MOUSE;tr|A0A0G2JEK2|A0A0G2JEK2_MOUSE;tr|Q6P3B4|Q6P3B4_MOUSE	tr|Q8C2N7|Q8C2N7_MOUSE Uncharacterized protein OS=Mus musculus OX=10090 GN=Crip1 PE=2 SV=1;sp|P63254|CRIP1_MOUSE Cysteine-rich protein 1 OS=Mus musculus OX=10090 GN=Crip1 PE=1 SV=2;tr|A0A0G2JEK2|A0A0G2JEK2_MOUSE Cysteine-rich protein 1 OS=Mus musculus OX=1	Q8C2N7	Crip1	LIM zinc-binding domain-containing protein	4	3	3	59.7	8.5618	64003000	71719000	96677000	131430000	134070000	196830000	1.98938	0.0311949
tr|E9QN31|E9QN31_MOUSE	tr|E9QN31|E9QN31_MOUSE	tr|E9QN31|E9QN31_MOUSE Probable 28S rRNA (cytosine-C(5))-methyltransferase OS=Mus musculus OX=10090 GN=Nop2 PE=1 SV=1	E9QN31	Nop2	Probable 28S rRNA (cytosine-C(5))-methyltransferase	1	26	1	36.3	86.906	1383100000	1437100000	1271200000	1539100000	1516200000	1517700000	1.11771	0.0314061
tr|M0QWS4|M0QWS4_MOUSE;sp|Q9CR09|UFC1_MOUSE	tr|M0QWS4|M0QWS4_MOUSE;sp|Q9CR09|UFC1_MOUSE	tr|M0QWS4|M0QWS4_MOUSE Ubiquitin-fold modifier conjugating enzyme 1, isoform CRA_c OS=Mus musculus OX=10090 GN=Ufc1 PE=1 SV=1;sp|Q9CR09|UFC1_MOUSE Ubiquitin-fold modifier-conjugating enzyme 1 OS=Mus musculus OX=10090 GN=Ufc1 PE=1 SV=1	M0QWS4	Ufc1 mCG_8647	Ubiquitin-fold modifier conjugating enzyme 1, isoform CRA_c (Ubiquitin-fold modifier-conjugating enzyme 1)	2	3	3	29	11.351	24174000	28559000	29320000	33767000	31845000	36067000	1.23919	0.0314845
tr|Q5DTJ4|Q5DTJ4_MOUSE;sp|Q7TSC1|PRC2A_MOUSE;tr|G3UX48|G3UX48_MOUSE	tr|Q5DTJ4|Q5DTJ4_MOUSE;sp|Q7TSC1|PRC2A_MOUSE;tr|G3UX48|G3UX48_MOUSE	tr|Q5DTJ4|Q5DTJ4_MOUSE MKIAA4178 protein (Fragment) OS=Mus musculus OX=10090 GN=Prrc2a PE=2 SV=1;sp|Q7TSC1|PRC2A_MOUSE Protein PRRC2A OS=Mus musculus OX=10090 GN=Prrc2a PE=1 SV=1;tr|G3UX48|G3UX48_MOUSE Protein PRRC2A OS=Mus musculus OX=10090 GN=Prrc2a PE=1	Q5DTJ4	Prrc2a Bat2 mKIAA4178	MKIAA4178 protein (Fragment)	3	8	6	7.3	191.12	19961000	17942000	19241000	15662000	17271000	16810000	0.870485	0.0315148
sp|Q8K4F5|ABHDB_MOUSE;tr|D3YYK0|D3YYK0_MOUSE;tr|A0A0J9YU40|A0A0J9YU40_MOUSE;tr|A0A0J9YVC2|A0A0J9YVC2_MOUSE;tr|A0A0J9YV94|A0A0J9YV94_MOUSE	sp|Q8K4F5|ABHDB_MOUSE;tr|D3YYK0|D3YYK0_MOUSE	sp|Q8K4F5|ABHDB_MOUSE Protein ABHD11 OS=Mus musculus OX=10090 GN=Abhd11 PE=1 SV=1;tr|D3YYK0|D3YYK0_MOUSE Abhydrolase domain containing 11, isoform CRA_b OS=Mus musculus OX=10090 GN=Abhd11 PE=1 SV=1	Q8K4F5	Abhd11 Wbscr21	Protein ABHD11 (EC 3.-.-.-) (Alpha/beta hydrolase domain-containing protein 11) (Abhydrolase domain-containing protein 11) (Williams-Beuren syndrome chromosomal region 21 protein homolog)	5	7	7	40.7	33.56	112630000	91632000	96321000	75877000	83065000	70591000	0.763626	0.0317918
sp|Q9QZQ8|H2AY_MOUSE;tr|Q8CA90|Q8CA90_MOUSE;tr|Q8BP16|Q8BP16_MOUSE;tr|Q9CTH9|Q9CTH9_MOUSE;tr|Q9D3U7|Q9D3U7_MOUSE;tr|Q9D3V6|Q9D3V6_MOUSE	sp|Q9QZQ8|H2AY_MOUSE	sp|Q9QZQ8|H2AY_MOUSE Core histone macro-H2A.1 OS=Mus musculus OX=10090 GN=H2afy PE=1 SV=3	Q9QZQ8	H2afy	Core histone macro-H2A.1 (Histone macroH2A1) (mH2A1) (H2A.y) (H2A/y)	6	16	14	49.5	39.735	1588900000	1675200000	1450000000	1361400000	1350400000	1209900000	0.831909	0.0319351
sp|Q921E2|RAB31_MOUSE;tr|Q3TXV4|Q3TXV4_MOUSE;tr|Q3TM43|Q3TM43_MOUSE;tr|D6RFT6|D6RFT6_MOUSE	sp|Q921E2|RAB31_MOUSE;tr|Q3TXV4|Q3TXV4_MOUSE	sp|Q921E2|RAB31_MOUSE Ras-related protein Rab-31 OS=Mus musculus OX=10090 GN=Rab31 PE=1 SV=1;tr|Q3TXV4|Q3TXV4_MOUSE Rab22B OS=Mus musculus OX=10090 GN=Rab31 PE=1 SV=1	Q921E2	Rab31	Ras-related protein Rab-31	4	9	7	58.2	21.331	284880000	269020000	270300000	223540000	250850000	250100000	0.879022	0.0322759
tr|S4R294|S4R294_MOUSE;tr|S4R2J9|S4R2J9_MOUSE;tr|A0A0A0MQ79|A0A0A0MQ79_MOUSE;sp|Q3TLH4|PRC2C_MOUSE;tr|S4R2E2|S4R2E2_MOUSE;tr|S4R209|S4R209_MOUSE;tr|S4R2L9|S4R2L9_MOUSE;tr|S4R298|S4R298_MOUSE;sp|Q7TPM1|PRC2B_MOUSE;tr|F8WHT3|F8WHT3_MOUSE	tr|S4R294|S4R294_MOUSE;tr|S4R2J9|S4R2J9_MOUSE;tr|A0A0A0MQ79|A0A0A0MQ79_MOUSE;sp|Q3TLH4|PRC2C_MOUSE	tr|S4R294|S4R294_MOUSE Protein PRRC2C OS=Mus musculus OX=10090 GN=Prrc2c PE=1 SV=1;tr|S4R2J9|S4R2J9_MOUSE Protein PRRC2C OS=Mus musculus OX=10090 GN=Prrc2c PE=1 SV=1;tr|A0A0A0MQ79|A0A0A0MQ79_MOUSE Protein PRRC2C OS=Mus musculus OX=10090 GN=Prrc2c PE=1 SV=1	S4R294	Prrc2c	Protein PRRC2C	10	20	18	10.2	298.11	197700000	183160000	212560000	226480000	223870000	225380000	1.1387	0.0322824
sp|Q80VY9|DHX33_MOUSE;tr|A3QK59|A3QK59_MOUSE;tr|K3W4M7|K3W4M7_MOUSE;tr|J3QNQ9|J3QNQ9_MOUSE	sp|Q80VY9|DHX33_MOUSE	sp|Q80VY9|DHX33_MOUSE ATP-dependent RNA helicase DHX33 OS=Mus musculus OX=10090 GN=Dhx33 PE=1 SV=1	Q80VY9	Dhx33	ATP-dependent RNA helicase DHX33 (EC 3.6.4.13) (DEAH box protein 33)	4	11	11	17.8	78.346	87350000	81901000	87905000	101470000	94055000	93130000	1.12249	0.0322945
tr|D3YWK1|D3YWK1_MOUSE;sp|Q80W47|WIPI2_MOUSE	tr|D3YWK1|D3YWK1_MOUSE;sp|Q80W47|WIPI2_MOUSE	tr|D3YWK1|D3YWK1_MOUSE WD repeat domain phosphoinositide-interacting protein 2 OS=Mus musculus OX=10090 GN=Wipi2 PE=1 SV=1;sp|Q80W47|WIPI2_MOUSE WD repeat domain phosphoinositide-interacting protein 2 OS=Mus musculus OX=10090 GN=Wipi2 PE=1 SV=1	D3YWK1	Wipi2	WD repeat domain phosphoinositide-interacting protein 2	2	2	2	11.3	46.434	12075000	11631000	12345000	13350000	12896000	12641000	1.07867	0.0323515
sp|Q9D023|MPC2_MOUSE;tr|A0A0A6YY89|A0A0A6YY89_MOUSE;tr|Q8BWL4|Q8BWL4_MOUSE;tr|Q6PAR8|Q6PAR8_MOUSE;tr|E9PY67|E9PY67_MOUSE;tr|Q925J5|Q925J5_MOUSE;tr|Q925J4|Q925J4_MOUSE;tr|Q3V1C1|Q3V1C1_MOUSE;tr|G5E869|G5E869_MOUSE;tr|Q8CHH6|Q8CHH6_MOUSE	sp|Q9D023|MPC2_MOUSE;tr|A0A0A6YY89|A0A0A6YY89_MOUSE	sp|Q9D023|MPC2_MOUSE Mitochondrial pyruvate carrier 2 OS=Mus musculus OX=10090 GN=Mpc2 PE=1 SV=1;tr|A0A0A6YY89|A0A0A6YY89_MOUSE Mitochondrial pyruvate carrier 2 OS=Mus musculus OX=10090 GN=Mpc2 PE=1 SV=1	Q9D023	Mpc2 Brp44	Mitochondrial pyruvate carrier 2 (Brain protein 44)	10	4	4	28.3	14.286	51517000	55055000	56376000	49473000	39616000	41803000	0.803275	0.0323875
tr|Q3UCF2|Q3UCF2_MOUSE;sp|Q6A068|CDC5L_MOUSE;tr|A0A1W2P7Z8|A0A1W2P7Z8_MOUSE;tr|A0A1W2P7H4|A0A1W2P7H4_MOUSE;tr|A0A1W2P855|A0A1W2P855_MOUSE;tr|A0A1W2P6Q8|A0A1W2P6Q8_MOUSE;tr|Q05DT4|Q05DT4_MOUSE	tr|Q3UCF2|Q3UCF2_MOUSE;sp|Q6A068|CDC5L_MOUSE;tr|A0A1W2P7Z8|A0A1W2P7Z8_MOUSE;tr|A0A1W2P7H4|A0A1W2P7H4_MOUSE;tr|A0A1W2P855|A0A1W2P855_MOUSE;tr|A0A1W2P6Q8|A0A1W2P6Q8_MOUSE;tr|Q05DT4|Q05DT4_MOUSE	tr|Q3UCF2|Q3UCF2_MOUSE MCG18249, isoform CRA_a OS=Mus musculus OX=10090 GN=Cdc5l PE=1 SV=1;sp|Q6A068|CDC5L_MOUSE Cell division cycle 5-like protein OS=Mus musculus OX=10090 GN=Cdc5l PE=1 SV=2;tr|A0A1W2P7Z8|A0A1W2P7Z8_MOUSE Predicted gene 9045 OS=Mus muscul	Q3UCF2	Cdc5l mCG_18249	MCG18249, isoform CRA_a	7	38	9	61.7	92.188	915930000	928670000	949040000	986500000	1030500000	971100000	1.06961	0.0328285
sp|Q9CWV0|MASU1_MOUSE	sp|Q9CWV0|MASU1_MOUSE	sp|Q9CWV0|MASU1_MOUSE Mitochondrial assembly of ribosomal large subunit protein 1 OS=Mus musculus OX=10090 GN=Malsu1 PE=1 SV=1	Q9CWV0	Malsu1	Mitochondrial assembly of ribosomal large subunit protein 1	1	3	3	16.7	26.02	51018000	41415000	43367000	34263000	37540000	32924000	0.771186	0.0328541
tr|Q3TJF2|Q3TJF2_MOUSE;sp|Q9CZ30|OLA1_MOUSE;tr|Q3TW21|Q3TW21_MOUSE;tr|B1AYJ9|B1AYJ9_MOUSE	tr|Q3TJF2|Q3TJF2_MOUSE;sp|Q9CZ30|OLA1_MOUSE;tr|Q3TW21|Q3TW21_MOUSE;tr|B1AYJ9|B1AYJ9_MOUSE	tr|Q3TJF2|Q3TJF2_MOUSE Obg-like ATPase 1 OS=Mus musculus OX=10090 GN=Ola1 PE=2 SV=1;sp|Q9CZ30|OLA1_MOUSE Obg-like ATPase 1 OS=Mus musculus OX=10090 GN=Ola1 PE=1 SV=1;tr|Q3TW21|Q3TW21_MOUSE Obg-like ATPase 1 OS=Mus musculus OX=10090 GN=Ola1 PE=2 SV=1;tr|B1A	Q3TJF2	Ola1 Gtpbp9 OLA1	Obg-like ATPase 1	4	12	11	35.4	44.787	155310000	178530000	182970000	194540000	211370000	205990000	1.18399	0.0329354
tr|Q3V3C0|Q3V3C0_MOUSE;tr|Q3U3J3|Q3U3J3_MOUSE;sp|Q8BKF1|RPOM_MOUSE;tr|E9PWD9|E9PWD9_MOUSE;tr|F6TLB0|F6TLB0_MOUSE;tr|Q9D196|Q9D196_MOUSE;tr|E0CY15|E0CY15_MOUSE	tr|Q3V3C0|Q3V3C0_MOUSE;tr|Q3U3J3|Q3U3J3_MOUSE;sp|Q8BKF1|RPOM_MOUSE;tr|E9PWD9|E9PWD9_MOUSE;tr|F6TLB0|F6TLB0_MOUSE;tr|Q9D196|Q9D196_MOUSE;tr|E0CY15|E0CY15_MOUSE	tr|Q3V3C0|Q3V3C0_MOUSE DNA-directed RNA polymerase (Fragment) OS=Mus musculus OX=10090 GN=Polrmt PE=2 SV=1;tr|Q3U3J3|Q3U3J3_MOUSE DNA-directed RNA polymerase OS=Mus musculus OX=10090 GN=Polrmt PE=1 SV=1;sp|Q8BKF1|RPOM_MOUSE DNA-directed RNA polymerase, mit	Q3V3C0	Polrmt	DNA-directed RNA polymerase (EC 2.7.7.6) (Fragment)	7	7	7	10.4	120.74	37261000	34950000	29945000	39457000	45512000	45598000	1.27811	0.0331058
tr|Q8BGJ5|Q8BGJ5_MOUSE;tr|Q3T984|Q3T984_MOUSE;tr|Q922I7|Q922I7_MOUSE;tr|Q8K144|Q8K144_MOUSE;tr|Q5RJV5|Q5RJV5_MOUSE;tr|Q3UBR5|Q3UBR5_MOUSE;tr|Q80T07|Q80T07_MOUSE;tr|Q6NZB8|Q6NZB8_MOUSE;tr|Q3TQW3|Q3TQW3_MOUSE;tr|Q8CB58|Q8CB58_MOUSE;tr|Q8R509|Q8R509_MOUSE;sp|P17225|PTBP1_MOUSE;tr|Q8C2R5|Q8C2R5_MOUSE;tr|E9QMW9|E9QMW9_MOUSE;tr|Q923A7|Q923A7_MOUSE;tr|F7DCW4|F7DCW4_MOUSE;tr|E9Q279|E9Q279_MOUSE;tr|F7AXP1…	tr|Q8BGJ5|Q8BGJ5_MOUSE;tr|Q3T984|Q3T984_MOUSE;tr|Q922I7|Q922I7_MOUSE;tr|Q8K144|Q8K144_MOUSE;tr|Q5RJV5|Q5RJV5_MOUSE;tr|Q3UBR5|Q3UBR5_MOUSE;tr|Q80T07|Q80T07_MOUSE;tr|Q6NZB8|Q6NZB8_MOUSE;tr|Q3TQW3|Q3TQW3_MOUSE;tr|Q8CB58|Q8CB58_MOUSE;tr|Q8R509|Q8R509_MOUSE;sp|P17225|PTBP1_MOUSE;tr|Q8C2R5|Q8C2R5_MOUSE;tr|E9QMW9|E9QMW9_MOUSE	tr|Q8BGJ5|Q8BGJ5_MOUSE MCG13402, isoform CRA_a OS=Mus musculus OX=10090 GN=Ptbp1 PE=1 SV=1;tr|Q3T984|Q3T984_MOUSE Uncharacterized protein OS=Mus musculus OX=10090 GN=Ptbp1 PE=2 SV=1;tr|Q922I7|Q922I7_MOUSE MCG13402, isoform CRA_c OS=Mus musculus OX=10090 GN	Q8BGJ5	Ptbp1 mCG_13402	MCG13402, isoform CRA_a (Polypyrimidine tract-binding protein 1)	19	20	1	60.3	56.891	3547300000	3563000000	3774300000	3978500000	3971500000	3809900000	1.08042	0.0333622
tr|Q542P5|Q542P5_MOUSE;sp|P08074|CBR2_MOUSE;tr|F6YNX9|F6YNX9_MOUSE	tr|Q542P5|Q542P5_MOUSE;sp|P08074|CBR2_MOUSE	tr|Q542P5|Q542P5_MOUSE Carbonyl reductase 2, isoform CRA_b OS=Mus musculus OX=10090 GN=Cbr2 PE=1 SV=1;sp|P08074|CBR2_MOUSE Carbonyl reductase [NADPH] 2 OS=Mus musculus OX=10090 GN=Cbr2 PE=1 SV=1	Q542P5	Cbr2 mCG_2145	Carbonyl reductase 2, isoform CRA_b	3	4	4	25	25.958	21947000	17872000	21980000	16408000	16533000	14950000	0.774948	0.0333662
tr|Q4FK14|Q4FK14_MOUSE;tr|Q3UQ93|Q3UQ93_MOUSE;tr|Q3ULV0|Q3ULV0_MOUSE;tr|Q3UAT2|Q3UAT2_MOUSE;sp|Q91V04|TRAM1_MOUSE;tr|Q9CVJ6|Q9CVJ6_MOUSE;tr|Q3TPI4|Q3TPI4_MOUSE	tr|Q4FK14|Q4FK14_MOUSE;tr|Q3UQ93|Q3UQ93_MOUSE;tr|Q3ULV0|Q3ULV0_MOUSE;tr|Q3UAT2|Q3UAT2_MOUSE;sp|Q91V04|TRAM1_MOUSE;tr|Q9CVJ6|Q9CVJ6_MOUSE	tr|Q4FK14|Q4FK14_MOUSE Translocating chain-associated membrane protein OS=Mus musculus OX=10090 GN=Tram1 PE=1 SV=1;tr|Q3UQ93|Q3UQ93_MOUSE Translocating chain-associated membrane protein OS=Mus musculus OX=10090 GN=Tram1 PE=2 SV=1;tr|Q3ULV0|Q3ULV0_MOUSE Tra	Q4FK14	Tram1 mCG_19492	Translocating chain-associated membrane protein	7	4	4	10.2	43.039	142000000	125570000	117410000	104730000	101220000	81583000	0.746878	0.0334494
tr|Q53YN4|Q53YN4_MOUSE;tr|Q3TGE4|Q3TGE4_MOUSE;sp|P28867|KPCD_MOUSE;tr|Q3UNG2|Q3UNG2_MOUSE;tr|Q80UN7|Q80UN7_MOUSE;tr|Q1MX41|Q1MX41_MOUSE;tr|Q1MX43|Q1MX43_MOUSE;tr|Q1MX40|Q1MX40_MOUSE;tr|Q1MX42|Q1MX42_MOUSE;tr|F1DGF6|F1DGF6_MOUSE;REV__tr|Q9CS87|Q9CS87_MOUSE;REV__tr|Q9CSI0|Q9CSI0_MOUSE;REV__tr|Q8BK20|Q8BK20_MOUSE;REV__tr|E9Q9T6|E9Q9T6_MOUSE;REV__sp|Q6ZPL9|DDX55_MOUSE;REV__tr|Q810A4|Q810A4_MOUSE	tr|Q53YN4|Q53YN4_MOUSE;tr|Q3TGE4|Q3TGE4_MOUSE;sp|P28867|KPCD_MOUSE;tr|Q3UNG2|Q3UNG2_MOUSE;tr|Q80UN7|Q80UN7_MOUSE;tr|Q1MX41|Q1MX41_MOUSE;tr|Q1MX43|Q1MX43_MOUSE;tr|Q1MX40|Q1MX40_MOUSE;tr|Q1MX42|Q1MX42_MOUSE;tr|F1DGF6|F1DGF6_MOUSE	tr|Q53YN4|Q53YN4_MOUSE Protein kinase C delta type OS=Mus musculus OX=10090 GN=Prkcd PE=2 SV=1;tr|Q3TGE4|Q3TGE4_MOUSE Protein kinase C delta type OS=Mus musculus OX=10090 GN=Prkcd PE=2 SV=1;sp|P28867|KPCD_MOUSE Protein kinase C delta type OS=Mus musculus O	Q53YN4	Prkcd	Protein kinase C delta type (EC 2.7.11.13) (nPKC-delta)	16	7	7	11.1	77.546	39394000	44326000	42131000	49732000	47613000	55935000	1.21795	0.0335555
sp|Q9D0D4|DIM1_MOUSE;tr|Q3UK38|Q3UK38_MOUSE	sp|Q9D0D4|DIM1_MOUSE;tr|Q3UK38|Q3UK38_MOUSE	sp|Q9D0D4|DIM1_MOUSE Probable dimethyladenosine transferase OS=Mus musculus OX=10090 GN=Dimt1 PE=2 SV=1;tr|Q3UK38|Q3UK38_MOUSE rRNA adenine N(6)-methyltransferase OS=Mus musculus OX=10090 GN=Dimt1 PE=2 SV=1	Q9D0D4	Dimt1 Dimt1l	Probable dimethyladenosine transferase (EC 2.1.1.183) (DIM1 dimethyladenosine transferase 1 homolog) (DIM1 dimethyladenosine transferase 1-like) (Probable 18S rRNA (adenine(1779)-N(6)/adenine(1780)-N(6))-dimethyltransferase) (Probable 18S rRNA dimethylase) (Probable S-adenosylmethionine-6-N',N'-adenosyl(rRNA) dimethyltransferase)	2	13	13	51.1	35.274	145350000	119790000	123740000	152880000	154620000	158570000	1.19849	0.0339035
tr|E9QLA5|E9QLA5_MOUSE;sp|Q0GNC1|INF2_MOUSE;tr|A0A1Y7VM80|A0A1Y7VM80_MOUSE	tr|E9QLA5|E9QLA5_MOUSE;sp|Q0GNC1|INF2_MOUSE;tr|A0A1Y7VM80|A0A1Y7VM80_MOUSE	tr|E9QLA5|E9QLA5_MOUSE Inverted formin-2 OS=Mus musculus OX=10090 GN=Inf2 PE=1 SV=1;sp|Q0GNC1|INF2_MOUSE Inverted formin-2 OS=Mus musculus OX=10090 GN=Inf2 PE=1 SV=1;tr|A0A1Y7VM80|A0A1Y7VM80_MOUSE Inverted formin-2 (Fragment) OS=Mus musculus OX=10090 GN=In	E9QLA5	Inf2	Inverted formin-2	3	27	27	34.4	138.36	394590000	409570000	442490000	457830000	463890000	491410000	1.13354	0.0339332
tr|A0A0N4SV66|A0A0N4SV66_MOUSE;tr|A0AUV1|A0AUV1_MOUSE;tr|A3KPD0|A3KPD0_MOUSE;sp|Q8CGP6|H2A1H_MOUSE;tr|Q8CGP4|Q8CGP4_MOUSE;sp|Q8R1M2|H2AJ_MOUSE;tr|B2RVF0|B2RVF0_MOUSE;tr|A2AB79|A2AB79_MOUSE;sp|Q8CGP7|H2A1K_MOUSE;sp|Q8CGP5|H2A1F_MOUSE;sp|Q8BFU2|H2A3_MOUSE;sp|C0HKE9|H2A1P_MOUSE;sp|C0HKE8|H2A1O_MOUSE;sp|C0HKE7|H2A1N_MOUSE;sp|C0HKE6|H2A1I_MOUSE;sp|C0HKE5|H2A1G_MOUSE;sp|C0HKE4|H2A1E_MOUSE;sp|C0HKE3|H2A…	tr|A0A0N4SV66|A0A0N4SV66_MOUSE;tr|A0AUV1|A0AUV1_MOUSE;tr|A3KPD0|A3KPD0_MOUSE;sp|Q8CGP6|H2A1H_MOUSE;tr|Q8CGP4|Q8CGP4_MOUSE;sp|Q8R1M2|H2AJ_MOUSE;tr|B2RVF0|B2RVF0_MOUSE;tr|A2AB79|A2AB79_MOUSE;sp|Q8CGP7|H2A1K_MOUSE;sp|Q8CGP5|H2A1F_MOUSE;sp|Q8BFU2|H2A3_MOUSE;sp|C0HKE9|H2A1P_MOUSE;sp|C0HKE8|H2A1O_MOUSE;sp|C0HKE7|H2A1N_MOUSE;sp|C0HKE6|H2A1I_MOUSE;sp|C0HKE5|H2A1G_MOUSE;sp|C0HKE4|H2A1E_MOUSE;sp|C0HKE3|H2A…	tr|A0A0N4SV66|A0A0N4SV66_MOUSE Histone H2A OS=Mus musculus OX=10090 GN=H2afj PE=1 SV=1;tr|A0AUV1|A0AUV1_MOUSE Histone H2A (Fragment) OS=Mus musculus OX=10090 GN=Hist1h2ah PE=2 SV=1;tr|A3KPD0|A3KPD0_MOUSE Histone H2A OS=Mus musculus OX=10090 GN=Hist1h2ah PE	A0A0N4SV66	H2afj	Histone H2A	21	6	1	36.5	13.66	623730000	771210000	907610000	348650000	537560000	476100000	0.591653	0.0340628
sp|Q7TQ95|LNP_MOUSE;tr|A2ASM0|A2ASM0_MOUSE;tr|A2ASM1|A2ASM1_MOUSE;tr|Q3UPJ6|Q3UPJ6_MOUSE	sp|Q7TQ95|LNP_MOUSE;tr|A2ASM0|A2ASM0_MOUSE	sp|Q7TQ95|LNP_MOUSE Endoplasmic reticulum junction formation protein lunapark OS=Mus musculus OX=10090 GN=Lnpk PE=1 SV=1;tr|A2ASM0|A2ASM0_MOUSE Endoplasmic reticulum junction formation protein lunapark (Fragment) OS=Mus musculus OX=10090 GN=Lnpk PE=1 SV=8	Q7TQ95	Lnpk Kiaa1715 Lnp Uln	Endoplasmic reticulum junction formation protein lunapark (ER junction formation factor lunapark) (Protein ulnaless)	4	14	3	47.8	47.499	129700000	130390000	125610000	121640000	113370000	121400000	0.92406	0.0345331
sp|Q9DBS2|TPRGL_MOUSE;tr|B1AX95|B1AX95_MOUSE	sp|Q9DBS2|TPRGL_MOUSE;tr|B1AX95|B1AX95_MOUSE	sp|Q9DBS2|TPRGL_MOUSE Tumor protein p63-regulated gene 1-like protein OS=Mus musculus OX=10090 GN=Tprg1l PE=1 SV=1;tr|B1AX95|B1AX95_MOUSE Transformation-related protein 63-regulated-like OS=Mus musculus OX=10090 GN=Tprgl PE=1 SV=1	Q9DBS2	Tprg1l Fam79a Mover Tprgl	Tumor protein p63-regulated gene 1-like protein (Mossy fiber terminal-associated vertebrate-specific presynaptic protein) (Protein FAM79A)	2	4	4	24.8	29.814	19100000	18446000	21366000	22102000	23151000	24762000	1.18847	0.0345399
sp|P84244|H33_MOUSE;sp|P02301|H3C_MOUSE;tr|E0CZ27|E0CZ27_MOUSE;tr|F8WI35|F8WI35_MOUSE;tr|E0CYN1|E0CYN1_MOUSE;tr|E0CYR7|E0CYR7_MOUSE	sp|P84244|H33_MOUSE;sp|P02301|H3C_MOUSE;tr|E0CZ27|E0CZ27_MOUSE;tr|F8WI35|F8WI35_MOUSE	sp|P84244|H33_MOUSE Histone H3.3 OS=Mus musculus OX=10090 GN=H3f3a PE=1 SV=2;sp|P02301|H3C_MOUSE Histone H3.3C OS=Mus musculus OX=10090 GN=H3f3c PE=3 SV=3;tr|E0CZ27|E0CZ27_MOUSE Histone H3 (Fragment) OS=Mus musculus OX=10090 GN=H3f3a PE=3 SV=1;tr|F8WI35|F8	P84244	H3f3a H3.3a; H3f3b H3.3b	Histone H3.3	6	9	2	55.9	15.328	801790000	586280000	672830000	1127700000	968060000	1462700000	1.72665	0.0346186
tr|B2RSE6|B2RSE6_MOUSE;sp|Q3TL26|TFB2M_MOUSE	tr|B2RSE6|B2RSE6_MOUSE;sp|Q3TL26|TFB2M_MOUSE	tr|B2RSE6|B2RSE6_MOUSE rRNA adenine N(6)-methyltransferase OS=Mus musculus OX=10090 GN=Tfb2m PE=2 SV=1;sp|Q3TL26|TFB2M_MOUSE Dimethyladenosine transferase 2, mitochondrial OS=Mus musculus OX=10090 GN=Tfb2m PE=2 SV=1	B2RSE6	Tfb2m mCG_116199	rRNA adenine N(6)-methyltransferase (EC 2.1.1.-)	2	5	5	15.4	45.863	43729000	40061000	39650000	50654000	63598000	51081000	1.33938	0.03465
sp|Q9Z1Z0|USO1_MOUSE;tr|A0A0J9YUG0|A0A0J9YUG0_MOUSE	sp|Q9Z1Z0|USO1_MOUSE	sp|Q9Z1Z0|USO1_MOUSE General vesicular transport factor p115 OS=Mus musculus OX=10090 GN=Uso1 PE=1 SV=2	Q9Z1Z0	Uso1 Vdp	General vesicular transport factor p115 (Protein USO1 homolog) (Transcytosis-associated protein) (TAP) (Vesicle-docking protein)	2	24	24	33.5	106.98	314010000	333510000	319850000	362260000	339070000	370920000	1.10842	0.0347735
sp|Q8K1N4|SPAS2_MOUSE;tr|A0A2R8W6M8|A0A2R8W6M8_MOUSE;tr|A0A2R8VJY7|A0A2R8VJY7_MOUSE;tr|A0A2R8VJN7|A0A2R8VJN7_MOUSE;tr|A0A2R8W6T4|A0A2R8W6T4_MOUSE	sp|Q8K1N4|SPAS2_MOUSE	sp|Q8K1N4|SPAS2_MOUSE Spermatogenesis-associated serine-rich protein 2 OS=Mus musculus OX=10090 GN=Spats2 PE=1 SV=1	Q8K1N4	Spats2 Scr59	Spermatogenesis-associated serine-rich protein 2 (Serine-rich spermatocytes and round spermatid 59 kDa protein) (p59scr)	5	8	8	20.9	58.955	53900000	52852000	43101000	40778000	36152000	38292000	0.7689	0.0352123
tr|F6SPK0|F6SPK0_MOUSE;tr|Q3UDP8|Q3UDP8_MOUSE;tr|Q3TV38|Q3TV38_MOUSE;sp|Q9JJZ4|UB2J1_MOUSE;tr|B1AWT7|B1AWT7_MOUSE	tr|F6SPK0|F6SPK0_MOUSE;tr|Q3UDP8|Q3UDP8_MOUSE;tr|Q3TV38|Q3TV38_MOUSE;sp|Q9JJZ4|UB2J1_MOUSE;tr|B1AWT7|B1AWT7_MOUSE	tr|F6SPK0|F6SPK0_MOUSE Ubiquitin-conjugating enzyme E2 J1 (Fragment) OS=Mus musculus OX=10090 GN=Ube2j1 PE=1 SV=1;tr|Q3UDP8|Q3UDP8_MOUSE Uncharacterized protein OS=Mus musculus OX=10090 GN=Ube2j1 PE=2 SV=1;tr|Q3TV38|Q3TV38_MOUSE Uncharacterized protein OS=	F6SPK0	Ube2j1	Ubiquitin-conjugating enzyme E2 J1 (Fragment)	5	5	5	19.8	28.808	53392000	47945000	47821000	59933000	55956000	55253000	1.14739	0.0353314
sp|Q9JKB1|UCHL3_MOUSE;tr|B2RTM4|B2RTM4_MOUSE;sp|P58321|UCHL4_MOUSE;tr|A0A2I3BQ39|A0A2I3BQ39_MOUSE;tr|Q8BWQ9|Q8BWQ9_MOUSE	sp|Q9JKB1|UCHL3_MOUSE;tr|B2RTM4|B2RTM4_MOUSE;sp|P58321|UCHL4_MOUSE;tr|A0A2I3BQ39|A0A2I3BQ39_MOUSE;tr|Q8BWQ9|Q8BWQ9_MOUSE	sp|Q9JKB1|UCHL3_MOUSE Ubiquitin carboxyl-terminal hydrolase isozyme L3 OS=Mus musculus OX=10090 GN=Uchl3 PE=1 SV=2;tr|B2RTM4|B2RTM4_MOUSE Ubiquitin carboxyl-terminal hydrolase OS=Mus musculus OX=10090 GN=Uchl4 PE=2 SV=1;sp|P58321|UCHL4_MOUSE Ubiquitin carb	Q9JKB1	Uchl3	Ubiquitin carboxyl-terminal hydrolase isozyme L3 (UCH-L3) (EC 3.4.19.12) (Ubiquitin thioesterase L3)	5	6	6	38.3	26.151	71580000	71500000	74579000	66736000	70032000	67669000	0.939254	0.0353482
sp|P70193|LRIG1_MOUSE;tr|B7ZP45|B7ZP45_MOUSE	sp|P70193|LRIG1_MOUSE;tr|B7ZP45|B7ZP45_MOUSE	sp|P70193|LRIG1_MOUSE Leucine-rich repeats and immunoglobulin-like domains protein 1 OS=Mus musculus OX=10090 GN=Lrig1 PE=1 SV=2;tr|B7ZP45|B7ZP45_MOUSE Lrig1 protein OS=Mus musculus OX=10090 GN=Lrig1 PE=2 SV=1	P70193	Lrig1	Leucine-rich repeats and immunoglobulin-like domains protein 1 (LIG-1)	2	14	14	23.5	119.15	81214000	83188000	91883000	73262000	73080000	60959000	0.808869	0.0353814
tr|Q5M9N8|Q5M9N8_MOUSE;tr|Q3UBI6|Q3UBI6_MOUSE;sp|P14148|RL7_MOUSE;tr|Q3TK73|Q3TK73_MOUSE;tr|F6XI62|F6XI62_MOUSE	tr|Q5M9N8|Q5M9N8_MOUSE;tr|Q3UBI6|Q3UBI6_MOUSE;sp|P14148|RL7_MOUSE;tr|Q3TK73|Q3TK73_MOUSE;tr|F6XI62|F6XI62_MOUSE	tr|Q5M9N8|Q5M9N8_MOUSE Ribosomal protein L7 OS=Mus musculus OX=10090 GN=Rpl7 PE=1 SV=1;tr|Q3UBI6|Q3UBI6_MOUSE Uncharacterized protein OS=Mus musculus OX=10090 GN=Rpl7 PE=2 SV=1;sp|P14148|RL7_MOUSE 60S ribosomal protein L7 OS=Mus musculus OX=10090 GN=Rpl7 P	Q5M9N8	Rpl7	Ribosomal protein L7	5	18	18	48.5	31.419	4275900000	4147800000	4170000000	4966300000	4412300000	4788600000	1.12494	0.0354762
sp|P57784|RU2A_MOUSE;tr|G5E883|G5E883_MOUSE;tr|Q8BSH5|Q8BSH5_MOUSE;tr|A0A0U1RNZ6|A0A0U1RNZ6_MOUSE	sp|P57784|RU2A_MOUSE;tr|G5E883|G5E883_MOUSE	sp|P57784|RU2A_MOUSE U2 small nuclear ribonucleoprotein A OS=Mus musculus OX=10090 GN=Snrpa1 PE=1 SV=2;tr|G5E883|G5E883_MOUSE Small nuclear ribonucleoprotein polypeptide A, isoform CRA_a OS=Mus musculus OX=10090 GN=Snrpa1 PE=1 SV=1	P57784	Snrpa1	U2 small nuclear ribonucleoprotein A' (U2 snRNP A')	4	15	15	71	28.357	550470000	538320000	579310000	639630000	594450000	670890000	1.142	0.0354959
sp|Q9CWE0|MFR1L_MOUSE;tr|D3YW54|D3YW54_MOUSE;tr|D6RCX5|D6RCX5_MOUSE;tr|D3Z0X8|D3Z0X8_MOUSE	sp|Q9CWE0|MFR1L_MOUSE;tr|D3YW54|D3YW54_MOUSE;tr|D6RCX5|D6RCX5_MOUSE;tr|D3Z0X8|D3Z0X8_MOUSE	sp|Q9CWE0|MFR1L_MOUSE Mitochondrial fission regulator 1-like OS=Mus musculus OX=10090 GN=Mtfr1l PE=1 SV=1;tr|D3YW54|D3YW54_MOUSE Mitochondrial fission regulator 1-like (Fragment) OS=Mus musculus OX=10090 GN=Mtfr1l PE=1 SV=1;tr|D6RCX5|D6RCX5_MOUSE Mitochond	Q9CWE0	Mtfr1l Fam54b	Mitochondrial fission regulator 1-like	4	6	6	35.6	31.726	36484000	31558000	32731000	29586000	24886000	27453000	0.812966	0.0355029
sp|Q9CQD1|RAB5A_MOUSE;tr|A2A5F6|A2A5F6_MOUSE	sp|Q9CQD1|RAB5A_MOUSE	sp|Q9CQD1|RAB5A_MOUSE Ras-related protein Rab-5A OS=Mus musculus OX=10090 GN=Rab5a PE=1 SV=1	Q9CQD1	Rab5a nnyRab5a	Ras-related protein Rab-5A	2	10	7	65.1	23.598	119190000	125020000	107760000	104020000	93629000	99224000	0.843461	0.0356227
sp|Q91YJ5|IF2M_MOUSE;tr|Q5M6W7|Q5M6W7_MOUSE;tr|F6RR02|F6RR02_MOUSE;tr|Q5M6W8|Q5M6W8_MOUSE;tr|Q8BW53|Q8BW53_MOUSE	sp|Q91YJ5|IF2M_MOUSE;tr|Q5M6W7|Q5M6W7_MOUSE;tr|F6RR02|F6RR02_MOUSE	sp|Q91YJ5|IF2M_MOUSE Translation initiation factor IF-2, mitochondrial OS=Mus musculus OX=10090 GN=Mtif2 PE=1 SV=2;tr|Q5M6W7|Q5M6W7_MOUSE Translation initiation factor IF-2, mitochondrial (Fragment) OS=Mus musculus OX=10090 GN=Mtif2 PE=1 SV=1;tr|F6RR02|F6R	Q91YJ5	Mtif2	Translation initiation factor IF-2, mitochondrial (IF-2(Mt)) (IF-2Mt) (IF2(mt))	5	7	7	14.3	81.288	40028000	44397000	38475000	45892000	46754000	47223000	1.13807	0.035657
sp|Q810B6|ANFY1_MOUSE;tr|B7ZP20|B7ZP20_MOUSE	sp|Q810B6|ANFY1_MOUSE;tr|B7ZP20|B7ZP20_MOUSE	sp|Q810B6|ANFY1_MOUSE Rabankyrin-5 OS=Mus musculus OX=10090 GN=Ankfy1 PE=1 SV=2;tr|B7ZP20|B7ZP20_MOUSE Ankyrin repeat and FYVE domain containing 1 OS=Mus musculus OX=10090 GN=Ankfy1 PE=2 SV=1	Q810B6	Ankfy1 Ankhzn Kiaa1255	Rabankyrin-5 (Rank-5) (Ankyrin repeat and FYVE domain-containing protein 1) (Ankyrin repeats hooked to a zinc finger motif)	2	13	13	18	128.65	52754000	52457000	59503000	46306000	48213000	47989000	0.865185	0.0357861
sp|Q9JJG9|NOA1_MOUSE;tr|Q8BMY1|Q8BMY1_MOUSE	sp|Q9JJG9|NOA1_MOUSE;tr|Q8BMY1|Q8BMY1_MOUSE	sp|Q9JJG9|NOA1_MOUSE Nitric oxide-associated protein 1 OS=Mus musculus OX=10090 GN=Noa1 PE=1 SV=1;tr|Q8BMY1|Q8BMY1_MOUSE Uncharacterized protein OS=Mus musculus OX=10090 GN=Noa1 PE=2 SV=1	Q9JJG9	Noa1 MNCb-4931	Nitric oxide-associated protein 1	2	10	10	18.3	77.378	51616000	53549000	43157000	59568000	68547000	60298000	1.2703	0.0358931
sp|Q91YU8|SSF1_MOUSE;tr|A0A1L1SRW3|A0A1L1SRW3_MOUSE	sp|Q91YU8|SSF1_MOUSE	sp|Q91YU8|SSF1_MOUSE Suppressor of SWI4 1 homolog OS=Mus musculus OX=10090 GN=Ppan PE=1 SV=2	Q91YU8	Ppan Ssf1	Suppressor of SWI4 1 homolog (Ssf-1) (Peter Pan homolog)	2	13	13	37	52.755	350860000	323630000	301310000	426110000	380810000	372230000	1.20839	0.0369673
tr|Q8CBP1|Q8CBP1_MOUSE;tr|Q3TJI7|Q3TJI7_MOUSE;sp|Q04736|YES_MOUSE;tr|Q8C762|Q8C762_MOUSE;tr|Q8C6U9|Q8C6U9_MOUSE;tr|A0A0J9YUV2|A0A0J9YUV2_MOUSE	tr|Q8CBP1|Q8CBP1_MOUSE;tr|Q3TJI7|Q3TJI7_MOUSE;sp|Q04736|YES_MOUSE;tr|Q8C762|Q8C762_MOUSE	tr|Q8CBP1|Q8CBP1_MOUSE Tyrosine-protein kinase OS=Mus musculus OX=10090 GN=Yes1 PE=2 SV=1;tr|Q3TJI7|Q3TJI7_MOUSE Tyrosine-protein kinase OS=Mus musculus OX=10090 GN=Yes1 PE=1 SV=1;sp|Q04736|YES_MOUSE Tyrosine-protein kinase Yes OS=Mus musculus OX=10090 GN=	Q8CBP1	Yes1 Yes	Tyrosine-protein kinase (EC 2.7.10.2)	6	12	8	35.9	60.657	74495000	74160000	77650000	70638000	58677000	58396000	0.82946	0.0371484
tr|Q4KL81|Q4KL81_MOUSE;sp|P63260|ACTG_MOUSE;tr|Q3TSB7|Q3TSB7_MOUSE;tr|Q3UD81|Q3UD81_MOUSE;tr|G3UYG0|G3UYG0_MOUSE;tr|B1ATY1|B1ATY1_MOUSE	tr|Q4KL81|Q4KL81_MOUSE;sp|P63260|ACTG_MOUSE;tr|Q3TSB7|Q3TSB7_MOUSE;tr|Q3UD81|Q3UD81_MOUSE	tr|Q4KL81|Q4KL81_MOUSE Actin, gamma, cytoplasmic 1 OS=Mus musculus OX=10090 GN=Actg1 PE=2 SV=1;sp|P63260|ACTG_MOUSE Actin, cytoplasmic 2 OS=Mus musculus OX=10090 GN=Actg1 PE=1 SV=1;tr|Q3TSB7|Q3TSB7_MOUSE Uncharacterized protein OS=Mus musculus OX=10090 GN=	Q4KL81	Actg1 mCG_2117	Actin, gamma, cytoplasmic 1 (MCG2117)	6	25	0	72	41.792	54136000000	54673000000	55458000000	53180000000	52607000000	53773000000	0.971345	0.0371774
sp|Q8BYM8|SYCM_MOUSE;tr|G3X975|G3X975_MOUSE;tr|A0A1B0GR87|A0A1B0GR87_MOUSE;tr|Q9CX12|Q9CX12_MOUSE;tr|Q8BY51|Q8BY51_MOUSE;tr|Q8BW29|Q8BW29_MOUSE;tr|A0A1B0GSP2|A0A1B0GSP2_MOUSE;tr|A0A1B0GSW7|A0A1B0GSW7_MOUSE	sp|Q8BYM8|SYCM_MOUSE;tr|G3X975|G3X975_MOUSE	sp|Q8BYM8|SYCM_MOUSE Probable cysteine--tRNA ligase, mitochondrial OS=Mus musculus OX=10090 GN=Cars2 PE=1 SV=2;tr|G3X975|G3X975_MOUSE MCG11180, isoform CRA_a OS=Mus musculus OX=10090 GN=Cars2 PE=1 SV=1	Q8BYM8	Cars2	Probable cysteine--tRNA ligase, mitochondrial (EC 6.1.1.16) (Cysteinyl-tRNA synthetase) (CysRS)	8	8	8	21.1	61.271	27821000	24657000	24971000	23257000	20051000	18817000	0.802141	0.037199
tr|Q78KL9|Q78KL9_MOUSE;tr|Q3TAV0|Q3TAV0_MOUSE;tr|Q3UD20|Q3UD20_MOUSE;tr|Q3T9B4|Q3T9B4_MOUSE;sp|Q9D8S4|ORN_MOUSE;tr|A0A1L1SS58|A0A1L1SS58_MOUSE	tr|Q78KL9|Q78KL9_MOUSE;tr|Q3TAV0|Q3TAV0_MOUSE;tr|Q3UD20|Q3UD20_MOUSE;tr|Q3T9B4|Q3T9B4_MOUSE;sp|Q9D8S4|ORN_MOUSE	tr|Q78KL9|Q78KL9_MOUSE Rexo2 protein OS=Mus musculus OX=10090 GN=Rexo2 PE=2 SV=1;tr|Q3TAV0|Q3TAV0_MOUSE Uncharacterized protein (Fragment) OS=Mus musculus OX=10090 GN=Rexo2 PE=2 SV=1;tr|Q3UD20|Q3UD20_MOUSE Uncharacterized protein (Fragment) OS=Mus musculus	Q78KL9	Rexo2 Smfn	Rexo2 protein	6	3	3	18.5	23.613	22265000	26391000	27189000	21597000	19339000	18561000	0.784455	0.0374057
sp|O35326|SRSF5_MOUSE;tr|Q9D8S5|Q9D8S5_MOUSE;tr|Q5U448|Q5U448_MOUSE;tr|S4R2G3|S4R2G3_MOUSE	sp|O35326|SRSF5_MOUSE;tr|Q9D8S5|Q9D8S5_MOUSE;tr|Q5U448|Q5U448_MOUSE	sp|O35326|SRSF5_MOUSE Serine/arginine-rich splicing factor 5 OS=Mus musculus OX=10090 GN=Srsf5 PE=1 SV=2;tr|Q9D8S5|Q9D8S5_MOUSE MCG7614, isoform CRA_c OS=Mus musculus OX=10090 GN=Srsf5 PE=1 SV=1;tr|Q5U448|Q5U448_MOUSE Sfrs5 protein OS=Mus musculus OX=10090	O35326	Srsf5 Hrs Sfrs5	Serine/arginine-rich splicing factor 5 (Delayed-early protein HRS) (Pre-mRNA-splicing factor SRP40) (Splicing factor, arginine/serine-rich 5)	4	10	9	30.9	30.891	440080000	464880000	447490000	488780000	494840000	544400000	1.12982	0.0374441
tr|Q5HZY7|Q5HZY7_MOUSE;sp|Q9CR51|VATG1_MOUSE;tr|Q3U7E0|Q3U7E0_MOUSE	tr|Q5HZY7|Q5HZY7_MOUSE;sp|Q9CR51|VATG1_MOUSE;tr|Q3U7E0|Q3U7E0_MOUSE	tr|Q5HZY7|Q5HZY7_MOUSE V-type proton ATPase subunit G OS=Mus musculus OX=10090 GN=Atp6v1g1 PE=1 SV=1;sp|Q9CR51|VATG1_MOUSE V-type proton ATPase subunit G 1 OS=Mus musculus OX=10090 GN=Atp6v1g1 PE=1 SV=3;tr|Q3U7E0|Q3U7E0_MOUSE V-type proton ATPase subunit G	Q5HZY7	Atp6v1g1 Atp6g1 mCG_20078	V-type proton ATPase subunit G	3	4	4	39	13.724	79372000	66327000	71440000	62263000	52118000	58503000	0.79619	0.0374885
tr|A0A140T8S5|A0A140T8S5_MOUSE;sp|Q8K327|CHAP1_MOUSE	tr|A0A140T8S5|A0A140T8S5_MOUSE;sp|Q8K327|CHAP1_MOUSE	tr|A0A140T8S5|A0A140T8S5_MOUSE Chromosome alignment-maintaining phosphoprotein 1 OS=Mus musculus OX=10090 GN=Champ1 PE=1 SV=2;sp|Q8K327|CHAP1_MOUSE Chromosome alignment-maintaining phosphoprotein 1 OS=Mus musculus OX=10090 GN=Champ1 PE=1 SV=1	A0A140T8S5	Champ1 D8Ertd457e mCG_60366	Chromosome alignment-maintaining phosphoprotein 1 (DNA segment, Chr 8, ERATO Doi 457, expressed, isoform CRA_b)	2	15	15	24.4	87.56	132400000	118870000	113230000	144860000	166280000	141620000	1.24214	0.0375212
sp|Q8K1J6|TRNT1_MOUSE;tr|A0A0N4SUW4|A0A0N4SUW4_MOUSE;tr|A0A0N4SV41|A0A0N4SV41_MOUSE	sp|Q8K1J6|TRNT1_MOUSE	sp|Q8K1J6|TRNT1_MOUSE CCA tRNA nucleotidyltransferase 1, mitochondrial OS=Mus musculus OX=10090 GN=Trnt1 PE=1 SV=1	Q8K1J6	Trnt1	CCA tRNA nucleotidyltransferase 1, mitochondrial (EC 2.7.7.72) (mitochondrial tRNA nucleotidyl transferase, CCA-adding) (mt CCA-adding enzyme) (mt tRNA CCA-diphosphorylase) (mt tRNA CCA-pyrophosphorylase) (mt tRNA adenylyltransferase)	3	8	8	26.7	49.895	93940000	80127000	79215000	106100000	98307000	98551000	1.19613	0.0375678
tr|A0A2R3XZC4|A0A2R3XZC4_MOUSE;sp|Q3TBT3|STING_MOUSE;tr|A0A2U8RP79|A0A2U8RP79_MOUSE	tr|A0A2R3XZC4|A0A2R3XZC4_MOUSE;sp|Q3TBT3|STING_MOUSE;tr|A0A2U8RP79|A0A2U8RP79_MOUSE	tr|A0A2R3XZC4|A0A2R3XZC4_MOUSE Stimulator of interferon protein OS=Mus musculus OX=10090 GN=Tmem173 PE=2 SV=1;sp|Q3TBT3|STING_MOUSE Stimulator of interferon genes protein OS=Mus musculus OX=10090 GN=Tmem173 PE=1 SV=2;tr|A0A2U8RP79|A0A2U8RP79_MOUSE STING-be	A0A2R3XZC4	Tmem173 STING	Stimulator of interferon protein	3	8	8	32	42.829	174110000	172870000	149680000	120080000	138340000	142210000	0.806648	0.0377892
tr|E9Q585|E9Q585_MOUSE;tr|E9PX68|E9PX68_MOUSE;tr|Q3UHY0|Q3UHY0_MOUSE;tr|Q5BKS1|Q5BKS1_MOUSE;tr|O54716|O54716_MOUSE;tr|E9Q1Q0|E9Q1Q0_MOUSE;tr|Q3UUI2|Q3UUI2_MOUSE;tr|Q6GQW1|Q6GQW1_MOUSE;tr|Q7TNP8|Q7TNP8_MOUSE;tr|A0A0J9YU76|A0A0J9YU76_MOUSE;tr|A0A0J9YTU2|A0A0J9YTU2_MOUSE	tr|E9Q585|E9Q585_MOUSE;tr|E9PX68|E9PX68_MOUSE;tr|Q3UHY0|Q3UHY0_MOUSE;tr|Q5BKS1|Q5BKS1_MOUSE;tr|O54716|O54716_MOUSE;tr|E9Q1Q0|E9Q1Q0_MOUSE;tr|Q3UUI2|Q3UUI2_MOUSE;tr|Q6GQW1|Q6GQW1_MOUSE	tr|E9Q585|E9Q585_MOUSE Solute carrier family 4 (anion exchanger), member 1, adaptor protein OS=Mus musculus OX=10090 GN=Slc4a1ap PE=1 SV=1;tr|E9PX68|E9PX68_MOUSE Solute carrier family 4 (anion exchanger), member 1, adaptor protein OS=Mus musculus OX=10090	E9Q585	Slc4a1ap	Solute carrier family 4 (anion exchanger), member 1, adaptor protein	11	5	5	9.4	79.671	17087000	14015000	17501000	19564000	19307000	19931000	1.20984	0.0379955
tr|Q60I30|Q60I30_MOUSE;sp|Q9D892|ITPA_MOUSE;tr|Q3U589|Q3U589_MOUSE	tr|Q60I30|Q60I30_MOUSE;sp|Q9D892|ITPA_MOUSE;tr|Q3U589|Q3U589_MOUSE	tr|Q60I30|Q60I30_MOUSE Inosine triphosphate pyrophosphatase OS=Mus musculus OX=10090 GN=Itpa PE=1 SV=1;sp|Q9D892|ITPA_MOUSE Inosine triphosphate pyrophosphatase OS=Mus musculus OX=10090 GN=Itpa PE=1 SV=2;tr|Q3U589|Q3U589_MOUSE Uncharacterized protein OS=Mu	Q60I30	Itpa ITPA mCG_18509	Inosine triphosphate pyrophosphatase (ITPase) (Inosine triphosphatase) (EC 3.6.1.9) (Non-canonical purine NTP pyrophosphatase) (Non-standard purine NTP pyrophosphatase) (Nucleoside-triphosphate diphosphatase) (Nucleoside-triphosphate pyrophosphatase) (NTPase)	3	3	3	27.8	21.897	26599000	26622000	30485000	24835000	22345000	22767000	0.835627	0.0379979
sp|Q9CZU6|CISY_MOUSE;tr|Q0QEL9|Q0QEL9_MOUSE;tr|Q9DAM4|Q9DAM4_MOUSE;tr|Q80X68|Q80X68_MOUSE	sp|Q9CZU6|CISY_MOUSE;tr|Q0QEL9|Q0QEL9_MOUSE	sp|Q9CZU6|CISY_MOUSE Citrate synthase, mitochondrial OS=Mus musculus OX=10090 GN=Cs PE=1 SV=1;tr|Q0QEL9|Q0QEL9_MOUSE Citrate synthase (Fragment) OS=Mus musculus OX=10090 GN=Cs PE=2 SV=1	Q9CZU6	Cs	Citrate synthase, mitochondrial (EC 2.3.3.1) (Citrate (Si)-synthase)	4	18	18	45.5	51.736	4095500000	3961900000	3799200000	4238400000	4184200000	4233300000	1.06741	0.0380826
tr|A0A2I3BPY7|A0A2I3BPY7_MOUSE;sp|Q9EP71|RAI14_MOUSE	tr|A0A2I3BPY7|A0A2I3BPY7_MOUSE;sp|Q9EP71|RAI14_MOUSE	tr|A0A2I3BPY7|A0A2I3BPY7_MOUSE Ankycorbin OS=Mus musculus OX=10090 GN=Rai14 PE=1 SV=1;sp|Q9EP71|RAI14_MOUSE Ankycorbin OS=Mus musculus OX=10090 GN=Rai14 PE=1 SV=1	A0A2I3BPY7	Rai14	Ankycorbin	2	42	42	56.3	105.71	572660000	568600000	572590000	527440000	508600000	554730000	0.928185	0.0380834
sp|Q9CZJ1|UTP11_MOUSE;tr|Q9D948|Q9D948_MOUSE	sp|Q9CZJ1|UTP11_MOUSE;tr|Q9D948|Q9D948_MOUSE	sp|Q9CZJ1|UTP11_MOUSE Probable U3 small nucleolar RNA-associated protein 11 OS=Mus musculus OX=10090 GN=Utp11 PE=2 SV=1;tr|Q9D948|Q9D948_MOUSE Uncharacterized protein OS=Mus musculus OX=10090 GN=Utp11 PE=2 SV=1	Q9CZJ1	Utp11 Utp11l	Probable U3 small nucleolar RNA-associated protein 11 (U3 snoRNA-associated protein 11) (UTP11-like protein)	2	10	10	33.6	30.55	203960000	210450000	200930000	217240000	213360000	213110000	1.0461	0.0383773
sp|Q9D6K5|SYJ2B_MOUSE;tr|Q6Y642|Q6Y642_MOUSE;tr|Q3UFD0|Q3UFD0_MOUSE;tr|E9PVN6|E9PVN6_MOUSE	sp|Q9D6K5|SYJ2B_MOUSE;tr|Q6Y642|Q6Y642_MOUSE;tr|Q3UFD0|Q3UFD0_MOUSE;tr|E9PVN6|E9PVN6_MOUSE	sp|Q9D6K5|SYJ2B_MOUSE Synaptojanin-2-binding protein OS=Mus musculus OX=10090 GN=Synj2bp PE=1 SV=1;tr|Q6Y642|Q6Y642_MOUSE Activin receptor-interacting protein 2a OS=Mus musculus OX=10090 PE=2 SV=1;tr|Q3UFD0|Q3UFD0_MOUSE Uncharacterized protein OS=Mus muscu	Q9D6K5	Synj2bp Arip2 Omp25	Synaptojanin-2-binding protein (Activin receptor-interacting protein 2) (Activin receptor-interacting protein 4) (Mitochondrial outer membrane protein 25)	4	4	4	30.3	15.815	107190000	94329000	96313000	177630000	165500000	119410000	1.55302	0.0391596
tr|Q542N8|Q542N8_MOUSE;tr|Q3TRX4|Q3TRX4_MOUSE;sp|Q9Z0P4|PALM_MOUSE;tr|Q91WF5|Q91WF5_MOUSE;tr|Q8CB16|Q8CB16_MOUSE;tr|Q6ZQE7|Q6ZQE7_MOUSE;tr|Q3UZP7|Q3UZP7_MOUSE;tr|A0A1W2P879|A0A1W2P879_MOUSE;tr|A0A1W2P831|A0A1W2P831_MOUSE;tr|G3X9P1|G3X9P1_MOUSE;tr|Q3UZT2|Q3UZT2_MOUSE;sp|Q8BR92|PALM2_MOUSE	tr|Q542N8|Q542N8_MOUSE;tr|Q3TRX4|Q3TRX4_MOUSE;sp|Q9Z0P4|PALM_MOUSE;tr|Q91WF5|Q91WF5_MOUSE;tr|Q8CB16|Q8CB16_MOUSE;tr|Q6ZQE7|Q6ZQE7_MOUSE;tr|Q3UZP7|Q3UZP7_MOUSE	tr|Q542N8|Q542N8_MOUSE Paralemmin, isoform CRA_b OS=Mus musculus OX=10090 GN=Palm PE=2 SV=1;tr|Q3TRX4|Q3TRX4_MOUSE Uncharacterized protein OS=Mus musculus OX=10090 GN=Palm PE=2 SV=1;sp|Q9Z0P4|PALM_MOUSE Paralemmin-1 OS=Mus musculus OX=10090 GN=Palm PE=1 SV	Q542N8	Palm mCG_141139	Paralemmin, isoform CRA_b	12	9	9	38.3	36.721	67685000	65778000	63594000	75027000	69176000	71540000	1.09483	0.0395859
sp|A2A863|ITB4_MOUSE;tr|A2A864|A2A864_MOUSE;tr|Q3UNP2|Q3UNP2_MOUSE;tr|Q3ULT5|Q3ULT5_MOUSE	sp|A2A863|ITB4_MOUSE;tr|A2A864|A2A864_MOUSE	sp|A2A863|ITB4_MOUSE Integrin beta-4 OS=Mus musculus OX=10090 GN=Itgb4 PE=1 SV=1;tr|A2A864|A2A864_MOUSE Integrin beta OS=Mus musculus OX=10090 GN=Itgb4 PE=1 SV=1	A2A863	Itgb4	Integrin beta-4 (CD antigen CD104)	4	35	35	27.8	201.65	234420000	256950000	222340000	195990000	199160000	214100000	0.853638	0.0396434
sp|P21550|ENOB_MOUSE;tr|Q4FK59|Q4FK59_MOUSE;tr|Q5SX59|Q5SX59_MOUSE;tr|J3QPZ9|J3QPZ9_MOUSE;tr|Q5SX60|Q5SX60_MOUSE;tr|Q5SX61|Q5SX61_MOUSE	sp|P21550|ENOB_MOUSE;tr|Q4FK59|Q4FK59_MOUSE;tr|Q5SX59|Q5SX59_MOUSE	sp|P21550|ENOB_MOUSE Beta-enolase OS=Mus musculus OX=10090 GN=Eno3 PE=1 SV=3;tr|Q4FK59|Q4FK59_MOUSE Eno3 protein OS=Mus musculus OX=10090 GN=Eno3 PE=2 SV=1;tr|Q5SX59|Q5SX59_MOUSE Beta-enolase (Fragment) OS=Mus musculus OX=10090 GN=Eno3 PE=1 SV=1	P21550	Eno3 Eno-3	Beta-enolase (EC 4.2.1.11) (2-phospho-D-glycerate hydro-lyase) (Enolase 3) (Muscle-specific enolase) (MSE) (Skeletal muscle enolase)	6	15	11	49.8	47.024	279750000	282780000	335260000	249110000	245900000	237150000	0.815514	0.0397319
sp|P10852|4F2_MOUSE;tr|Q3TN39|Q3TN39_MOUSE;tr|Q8BTJ9|Q8BTJ9_MOUSE;tr|Q60849|Q60849_MOUSE;tr|A0A0U1RP98|A0A0U1RP98_MOUSE;tr|Q3U144|Q3U144_MOUSE;tr|A0A0U1RPG5|A0A0U1RPG5_MOUSE;tr|A0A0U1RP32|A0A0U1RP32_MOUSE;tr|A0A0U1RPK4|A0A0U1RPK4_MOUSE;tr|A0A0U1RPL8|A0A0U1RPL8_MOUSE;tr|Q3TIP1|Q3TIP1_MOUSE;tr|A0A0U1RPQ7|A0A0U1RPQ7_MOUSE	sp|P10852|4F2_MOUSE;tr|Q3TN39|Q3TN39_MOUSE;tr|Q8BTJ9|Q8BTJ9_MOUSE;tr|Q60849|Q60849_MOUSE;tr|A0A0U1RP98|A0A0U1RP98_MOUSE;tr|Q3U144|Q3U144_MOUSE	sp|P10852|4F2_MOUSE 4F2 cell-surface antigen heavy chain OS=Mus musculus OX=10090 GN=Slc3a2 PE=1 SV=1;tr|Q3TN39|Q3TN39_MOUSE Uncharacterized protein OS=Mus musculus OX=10090 GN=Slc3a2 PE=2 SV=1;tr|Q8BTJ9|Q8BTJ9_MOUSE Uncharacterized protein OS=Mus musculus	P10852	Slc3a2 Mdu1	4F2 cell-surface antigen heavy chain (4F2hc) (Solute carrier family 3 member 2) (CD antigen CD98)	12	22	22	44.7	58.336	1691300000	1875700000	1599600000	1445700000	1401800000	1521800000	0.845682	0.0397321
sp|Q91WK5|GCSH_MOUSE;tr|Q9CV53|Q9CV53_MOUSE	sp|Q91WK5|GCSH_MOUSE;tr|Q9CV53|Q9CV53_MOUSE	sp|Q91WK5|GCSH_MOUSE Glycine cleavage system H protein, mitochondrial OS=Mus musculus OX=10090 GN=Gcsh PE=1 SV=2;tr|Q9CV53|Q9CV53_MOUSE Glycine cleavage system H protein (Fragment) OS=Mus musculus OX=10090 GN=Gcsh PE=2 SV=1	Q91WK5	Gcsh	Glycine cleavage system H protein, mitochondrial (Lipoic acid-containing protein)	2	3	3	39.4	18.637	125300000	130640000	102280000	162230000	149200000	141840000	1.26534	0.0397878
tr|E9PUQ9|E9PUQ9_MOUSE;tr|F7AC58|F7AC58_MOUSE;sp|E2JF22|PIEZ1_MOUSE;tr|Q6ZQF9|Q6ZQF9_MOUSE;tr|Q80XT7|Q80XT7_MOUSE;tr|Q3UM62|Q3UM62_MOUSE;tr|Q7TQL5|Q7TQL5_MOUSE;tr|Q811I7|Q811I7_MOUSE;tr|F6PYU5|F6PYU5_MOUSE;tr|F6QY99|F6QY99_MOUSE	tr|E9PUQ9|E9PUQ9_MOUSE;tr|F7AC58|F7AC58_MOUSE;sp|E2JF22|PIEZ1_MOUSE;tr|Q6ZQF9|Q6ZQF9_MOUSE;tr|Q80XT7|Q80XT7_MOUSE;tr|Q3UM62|Q3UM62_MOUSE	tr|E9PUQ9|E9PUQ9_MOUSE Piezo-type mechanosensitive ion channel component OS=Mus musculus OX=10090 GN=Piezo1 PE=1 SV=1;tr|F7AC58|F7AC58_MOUSE Piezo-type mechanosensitive ion channel component OS=Mus musculus OX=10090 GN=Piezo1 PE=1 SV=2;sp|E2JF22|PIEZ1_MOUS	E9PUQ9	Piezo1 Fam38a	Piezo-type mechanosensitive ion channel component	10	16	16	8.3	291.99	95643000	101560000	106260000	71691000	91172000	82736000	0.809321	0.0398177
sp|P59326|YTHD1_MOUSE;tr|A2AWN8|A2AWN8_MOUSE;tr|Q3TH60|Q3TH60_MOUSE;tr|Q3U8D6|Q3U8D6_MOUSE;tr|Q8BUI8|Q8BUI8_MOUSE	sp|P59326|YTHD1_MOUSE;tr|A2AWN8|A2AWN8_MOUSE;tr|Q3TH60|Q3TH60_MOUSE	sp|P59326|YTHD1_MOUSE YTH domain-containing family protein 1 OS=Mus musculus OX=10090 GN=Ythdf1 PE=1 SV=1;tr|A2AWN8|A2AWN8_MOUSE YTH domain family 1, isoform CRA_a OS=Mus musculus OX=10090 GN=Ythdf1 PE=1 SV=1;tr|Q3TH60|Q3TH60_MOUSE Uncharacterized protein	P59326	Ythdf1	YTH domain-containing family protein 1 (Dermatomyositis associated with cancer putative autoantigen 1 homolog) (DACA-1 homolog)	5	8	2	21.5	60.878	17513000	15212000	16901000	20002000	19159000	18209000	1.15605	0.0400453
sp|Q8R127|SCPDL_MOUSE;tr|Q3ULN6|Q3ULN6_MOUSE;tr|J3QNN5|J3QNN5_MOUSE;tr|F6S0R8|F6S0R8_MOUSE	sp|Q8R127|SCPDL_MOUSE;tr|Q3ULN6|Q3ULN6_MOUSE	sp|Q8R127|SCPDL_MOUSE Saccharopine dehydrogenase-like oxidoreductase OS=Mus musculus OX=10090 GN=Sccpdh PE=1 SV=1;tr|Q3ULN6|Q3ULN6_MOUSE Uncharacterized protein OS=Mus musculus OX=10090 GN=Sccpdh PE=2 SV=1	Q8R127	Sccpdh	Saccharopine dehydrogenase-like oxidoreductase (EC 1.-.-.-)	4	10	10	38.5	47.129	173990000	190180000	166610000	149920000	158510000	135530000	0.836429	0.0401543
tr|Q543N5|Q543N5_MOUSE;sp|Q9QYB1|CLIC4_MOUSE;tr|Q3U8I1|Q3U8I1_MOUSE	tr|Q543N5|Q543N5_MOUSE;sp|Q9QYB1|CLIC4_MOUSE	tr|Q543N5|Q543N5_MOUSE Chloride intracellular channel protein OS=Mus musculus OX=10090 GN=Clic4 PE=1 SV=1;sp|Q9QYB1|CLIC4_MOUSE Chloride intracellular channel protein 4 OS=Mus musculus OX=10090 GN=Clic4 PE=1 SV=3	Q543N5	Clic4	Chloride intracellular channel protein	3	9	9	62.8	28.729	122810000	137910000	134250000	164210000	146970000	148180000	1.16303	0.0403638
tr|Q545S0|Q545S0_MOUSE;sp|P52196|THTR_MOUSE	tr|Q545S0|Q545S0_MOUSE;sp|P52196|THTR_MOUSE	tr|Q545S0|Q545S0_MOUSE Sulfurtransferase OS=Mus musculus OX=10090 GN=Tst PE=1 SV=1;sp|P52196|THTR_MOUSE Thiosulfate sulfurtransferase OS=Mus musculus OX=10090 GN=Tst PE=1 SV=3	Q545S0	Tst mCG_13351	Sulfurtransferase	2	10	10	41.4	33.466	264400000	255560000	244450000	227570000	235420000	240160000	0.91986	0.0405254
sp|Q8BHG9|CGBP1_MOUSE	sp|Q8BHG9|CGBP1_MOUSE	sp|Q8BHG9|CGBP1_MOUSE CGG triplet repeat-binding protein 1 OS=Mus musculus OX=10090 GN=Cggbp1 PE=1 SV=1	Q8BHG9	Cggbp1	CGG triplet repeat-binding protein 1 (CGG-binding protein 1) (20 kDa CGG-binding protein) (p20-CGGBP DNA-binding protein)	1	5	5	31.7	18.761	27409000	33246000	30890000	25933000	23537000	25536000	0.819335	0.0407663
tr|Q545H3|Q545H3_MOUSE;tr|Q3UBR8|Q3UBR8_MOUSE;sp|Q9Z0V7|TI17B_MOUSE	tr|Q545H3|Q545H3_MOUSE;tr|Q3UBR8|Q3UBR8_MOUSE;sp|Q9Z0V7|TI17B_MOUSE	tr|Q545H3|Q545H3_MOUSE Mitochondrial import inner membrane translocase subunit TIM17 OS=Mus musculus OX=10090 GN=Timm17b PE=1 SV=1;tr|Q3UBR8|Q3UBR8_MOUSE Mitochondrial import inner membrane translocase subunit TIM17 OS=Mus musculus OX=10090 GN=Timm17b PE=2	Q545H3	Timm17b	Mitochondrial import inner membrane translocase subunit TIM17	3	2	2	17.4	18.352	21109000	22616000	21246000	20414000	19259000	18239000	0.891352	0.0410035
tr|Q3UAT9|Q3UAT9_MOUSE;tr|Q3U9N8|Q3U9N8_MOUSE;sp|P24547|IMDH2_MOUSE;tr|Q3UPJ2|Q3UPJ2_MOUSE;tr|A0A0A6YXS4|A0A0A6YXS4_MOUSE;tr|O89058|O89058_MOUSE	tr|Q3UAT9|Q3UAT9_MOUSE;tr|Q3U9N8|Q3U9N8_MOUSE;sp|P24547|IMDH2_MOUSE;tr|Q3UPJ2|Q3UPJ2_MOUSE	tr|Q3UAT9|Q3UAT9_MOUSE Inosine-5-monophosphate dehydrogenase OS=Mus musculus OX=10090 GN=Impdh2 PE=1 SV=1;tr|Q3U9N8|Q3U9N8_MOUSE Inosine-5-monophosphate dehydrogenase OS=Mus musculus OX=10090 GN=Impdh2 PE=2 SV=1;sp|P24547|IMDH2_MOUSE Inosine-5-monophosp	Q3UAT9	Impdh2 IMPDH mCG_16503	Inosine-5'-monophosphate dehydrogenase (IMP dehydrogenase) (IMPD) (IMPDH) (EC 1.1.1.205)	6	26	11	58.4	55.814	1168400000	1242200000	1614200000	1686600000	1886900000	1785600000	1.33152	0.0410068
tr|Q3U430|Q3U430_MOUSE;sp|Q8BZQ7|ANC2_MOUSE;tr|Q6ZPR8|Q6ZPR8_MOUSE;tr|Q6P0W7|Q6P0W7_MOUSE;tr|A2AI11|A2AI11_MOUSE	tr|Q3U430|Q3U430_MOUSE;sp|Q8BZQ7|ANC2_MOUSE;tr|Q6ZPR8|Q6ZPR8_MOUSE	tr|Q3U430|Q3U430_MOUSE Anaphase promoting complex subunit 2 OS=Mus musculus OX=10090 GN=Anapc2 PE=2 SV=1;sp|Q8BZQ7|ANC2_MOUSE Anaphase-promoting complex subunit 2 OS=Mus musculus OX=10090 GN=Anapc2 PE=1 SV=2;tr|Q6ZPR8|Q6ZPR8_MOUSE MKIAA1406 protein (Fragme	Q3U430	Anapc2 mCG_20311	Anaphase promoting complex subunit 2	5	8	8	11.8	95.022	28783000	23204000	30673000	34157000	35592000	33583000	1.25008	0.0411552
sp|P70452|STX4_MOUSE;tr|D6RJ29|D6RJ29_MOUSE	sp|P70452|STX4_MOUSE	sp|P70452|STX4_MOUSE Syntaxin-4 OS=Mus musculus OX=10090 GN=Stx4 PE=1 SV=1	P70452	Stx4 Stx4a	Syntaxin-4	2	8	8	33.6	34.165	90252000	93113000	85686000	84812000	79940000	81062000	0.913633	0.0415525
tr|Q0VGU0|Q0VGU0_MOUSE;sp|Q9CQC9|SAR1B_MOUSE;tr|Q3U281|Q3U281_MOUSE	tr|Q0VGU0|Q0VGU0_MOUSE;sp|Q9CQC9|SAR1B_MOUSE;tr|Q3U281|Q3U281_MOUSE	tr|Q0VGU0|Q0VGU0_MOUSE SAR1 gene homolog B (S. cerevisiae) OS=Mus musculus OX=10090 GN=Sar1b PE=1 SV=1;sp|Q9CQC9|SAR1B_MOUSE GTP-binding protein SAR1b OS=Mus musculus OX=10090 GN=Sar1b PE=1 SV=1;tr|Q3U281|Q3U281_MOUSE Uncharacterized protein OS=Mus musculu	Q0VGU0	Sar1b mCG_6993	SAR1 gene homolog B (S. cerevisiae)	3	9	5	59.1	22.382	41695000	36966000	48603000	29506000	32292000	33619000	0.749756	0.0416667
tr|Q3U3S0|Q3U3S0_MOUSE;sp|P58404|STRN4_MOUSE;tr|V9GXE7|V9GXE7_MOUSE;tr|V9GXT1|V9GXT1_MOUSE;tr|V9GXI9|V9GXI9_MOUSE	tr|Q3U3S0|Q3U3S0_MOUSE;sp|P58404|STRN4_MOUSE;tr|V9GXE7|V9GXE7_MOUSE	tr|Q3U3S0|Q3U3S0_MOUSE Uncharacterized protein OS=Mus musculus OX=10090 GN=Strn4 PE=2 SV=1;sp|P58404|STRN4_MOUSE Striatin-4 OS=Mus musculus OX=10090 GN=Strn4 PE=1 SV=2;tr|V9GXE7|V9GXE7_MOUSE Striatin-4 (Fragment) OS=Mus musculus OX=10090 GN=Strn4 PE=1 SV=1	Q3U3S0	Strn4	WD_REPEATS_REGION domain-containing protein	5	6	5	11	80.964	18404000	18011000	18181000	16946000	17570000	NaN	0.948311	0.0418495
sp|B7ZMP1|XPP3_MOUSE	sp|B7ZMP1|XPP3_MOUSE	sp|B7ZMP1|XPP3_MOUSE Xaa-Pro aminopeptidase 3 OS=Mus musculus OX=10090 GN=Xpnpep3 PE=1 SV=1	B7ZMP1	Xpnpep3	Xaa-Pro aminopeptidase 3 (X-Pro aminopeptidase 3) (EC 3.4.11.9) (Aminopeptidase P3) (APP3)	1	7	7	23.9	56.677	51322000	43927000	48415000	32265000	42058000	37815000	0.780557	0.0418542
tr|Q7M739|Q7M739_MOUSE;tr|Q3V1L5|Q3V1L5_MOUSE;tr|Q32P08|Q32P08_MOUSE;tr|Q8BU18|Q8BU18_MOUSE;tr|Q05CS8|Q05CS8_MOUSE;tr|Q8BK71|Q8BK71_MOUSE	tr|Q7M739|Q7M739_MOUSE;tr|Q3V1L5|Q3V1L5_MOUSE	tr|Q7M739|Q7M739_MOUSE Nuclear pore complex-associated intranuclear coiled-coil protein TPR OS=Mus musculus OX=10090 GN=Tpr PE=1 SV=1;tr|Q3V1L5|Q3V1L5_MOUSE Uncharacterized protein (Fragment) OS=Mus musculus OX=10090 GN=Tpr PE=2 SV=1	Q7M739	Tpr mCG_8530	Nuclear pore complex-associated intranuclear coiled-coil protein TPR (Nucleoprotein TPR) (Translocated promoter region) (Translocated promoter region, isoform CRA_b)	6	100	2	47.2	266.92	2267400000	2249800000	2352700000	2798300000	2513600000	2485700000	1.13504	0.0419498
tr|Q8BIB9|Q8BIB9_MOUSE;sp|Q9D291|DESI2_MOUSE;tr|E0CYV4|E0CYV4_MOUSE;tr|Q3UJE4|Q3UJE4_MOUSE	tr|Q8BIB9|Q8BIB9_MOUSE;sp|Q9D291|DESI2_MOUSE;tr|E0CYV4|E0CYV4_MOUSE;tr|Q3UJE4|Q3UJE4_MOUSE	tr|Q8BIB9|Q8BIB9_MOUSE Deubiquitinase DESI2 OS=Mus musculus OX=10090 GN=Desi2 PE=1 SV=1;sp|Q9D291|DESI2_MOUSE Deubiquitinase DESI2 OS=Mus musculus OX=10090 GN=Desi2 PE=1 SV=1;tr|E0CYV4|E0CYV4_MOUSE Deubiquitinase DESI2 (Fragment) OS=Mus musculus OX=10090 G	Q8BIB9	Desi2	Deubiquitinase DESI2	4	4	4	57.9	19.536	12770000	16396000	NaN	19104000	21175000	22530000	1.43567	0.042283
sp|O70579|PM34_MOUSE;tr|A0A2R8VI88|A0A2R8VI88_MOUSE	sp|O70579|PM34_MOUSE	sp|O70579|PM34_MOUSE Peroxisomal membrane protein PMP34 OS=Mus musculus OX=10090 GN=Slc25a17 PE=1 SV=1	O70579	Slc25a17 Pmp34 Pmp35	Peroxisomal membrane protein PMP34 (34 kDa peroxisomal membrane protein) (Solute carrier family 25 member 17)	2	5	5	16.3	34.412	52893000	50705000	48492000	46836000	43066000	46639000	0.897764	0.0425326
tr|Q642K1|Q642K1_MOUSE;tr|Q58EW0|Q58EW0_MOUSE;sp|P35980|RL18_MOUSE;tr|A0A1B0GSS8|A0A1B0GSS8_MOUSE;tr|A0A1B0GQU8|A0A1B0GQU8_MOUSE;tr|Q0QEW9|Q0QEW9_MOUSE;tr|A0A1B0GSA8|A0A1B0GSA8_MOUSE;tr|A0A1B0GSF7|A0A1B0GSF7_MOUSE;tr|A0A1B0GRZ3|A0A1B0GRZ3_MOUSE;tr|A0A1B0GS28|A0A1B0GS28_MOUSE	tr|Q642K1|Q642K1_MOUSE;tr|Q58EW0|Q58EW0_MOUSE;sp|P35980|RL18_MOUSE;tr|A0A1B0GSS8|A0A1B0GSS8_MOUSE;tr|A0A1B0GQU8|A0A1B0GQU8_MOUSE;tr|Q0QEW9|Q0QEW9_MOUSE;tr|A0A1B0GSA8|A0A1B0GSA8_MOUSE;tr|A0A1B0GSF7|A0A1B0GSF7_MOUSE	tr|Q642K1|Q642K1_MOUSE Ribosomal protein L18 OS=Mus musculus OX=10090 GN=Rpl18 PE=2 SV=1;tr|Q58EW0|Q58EW0_MOUSE MCG132477, isoform CRA_a OS=Mus musculus OX=10090 GN=Rpl18 PE=1 SV=1;sp|P35980|RL18_MOUSE 60S ribosomal protein L18 OS=Mus musculus OX=10090 GN=	Q642K1	Rpl18	Ribosomal protein L18	10	6	6	33.5	21.643	1680100000	1599800000	1724800000	1830100000	1816700000	1748800000	1.07811	0.0425903
sp|Q9QYA2|TOM40_MOUSE;tr|Q3UQD0|Q3UQD0_MOUSE;tr|G3UY77|G3UY77_MOUSE	sp|Q9QYA2|TOM40_MOUSE;tr|Q3UQD0|Q3UQD0_MOUSE	sp|Q9QYA2|TOM40_MOUSE Mitochondrial import receptor subunit TOM40 homolog OS=Mus musculus OX=10090 GN=Tomm40 PE=1 SV=3;tr|Q3UQD0|Q3UQD0_MOUSE Uncharacterized protein (Fragment) OS=Mus musculus OX=10090 GN=Tomm40 PE=2 SV=1	Q9QYA2	Tomm40 Mom35 Tom40	Mitochondrial import receptor subunit TOM40 homolog (Mitochondrial outer membrane protein of 35 kDa) (MOM35) (Protein Haymaker) (Translocase of outer membrane 40 kDa subunit homolog)	3	9	9	37.7	37.895	747530000	712950000	669930000	566810000	628810000	645760000	0.864331	0.0427205
sp|Q9CQU3|RER1_MOUSE	sp|Q9CQU3|RER1_MOUSE	sp|Q9CQU3|RER1_MOUSE Protein RER1 OS=Mus musculus OX=10090 GN=Rer1 PE=1 SV=1	Q9CQU3	Rer1	Protein RER1	1	5	5	28.1	22.988	227870000	222630000	208310000	237570000	278390000	287740000	1.21993	0.0427515
tr|Q3UDX9|Q3UDX9_MOUSE;tr|Q3UBB0|Q3UBB0_MOUSE;sp|Q8BFR4|GNS_MOUSE;tr|A0A1W2P8D3|A0A1W2P8D3_MOUSE;tr|Q6PCZ1|Q6PCZ1_MOUSE	tr|Q3UDX9|Q3UDX9_MOUSE;tr|Q3UBB0|Q3UBB0_MOUSE;sp|Q8BFR4|GNS_MOUSE	tr|Q3UDX9|Q3UDX9_MOUSE Uncharacterized protein (Fragment) OS=Mus musculus OX=10090 GN=Gns PE=2 SV=1;tr|Q3UBB0|Q3UBB0_MOUSE Uncharacterized protein (Fragment) OS=Mus musculus OX=10090 GN=Gns PE=2 SV=1;sp|Q8BFR4|GNS_MOUSE N-acetylglucosamine-6-sulfatase OS=M	Q3UDX9	Gns	Sulfatase domain-containing protein (Fragment)	5	4	4	10.1	45.283	40716000	36163000	32114000	28156000	27465000	30295000	0.788271	0.0428714
sp|Q9Z1P6|NDUA7_MOUSE;tr|A0A068BGR9|A0A068BGR9_MOUSE	sp|Q9Z1P6|NDUA7_MOUSE;tr|A0A068BGR9|A0A068BGR9_MOUSE	sp|Q9Z1P6|NDUA7_MOUSE NADH dehydrogenase [ubiquinone] 1 alpha subcomplex subunit 7 OS=Mus musculus OX=10090 GN=Ndufa7 PE=1 SV=3;tr|A0A068BGR9|A0A068BGR9_MOUSE NADH dehydrogenase OS=Mus musculus OX=10090 GN=Ndufa7 PE=2 SV=1	Q9Z1P6	Ndufa7	NADH dehydrogenase [ubiquinone] 1 alpha subcomplex subunit 7 (Complex I-B14.5a) (CI-B14.5a) (NADH-ubiquinone oxidoreductase subunit B14.5a)	2	4	4	37.2	12.575	69729000	61924000	63310000	57181000	46670000	55527000	0.817478	0.0429626
sp|P11352|GPX1_MOUSE;tr|A0A0A6YY34|A0A0A6YY34_MOUSE;tr|A0A0A6YVV2|A0A0A6YVV2_MOUSE	sp|P11352|GPX1_MOUSE;tr|A0A0A6YY34|A0A0A6YY34_MOUSE;tr|A0A0A6YVV2|A0A0A6YVV2_MOUSE	sp|P11352|GPX1_MOUSE Glutathione peroxidase 1 OS=Mus musculus OX=10090 GN=Gpx1 PE=1 SV=2;tr|A0A0A6YY34|A0A0A6YY34_MOUSE Glutathione peroxidase OS=Mus musculus OX=10090 GN=Gpx1 PE=1 SV=1;tr|A0A0A6YVV2|A0A0A6YVV2_MOUSE Glutathione peroxidase OS=Mus musculus	P11352	Gpx1	Glutathione peroxidase 1 (GPx-1) (GSHPx-1) (EC 1.11.1.9) (Cellular glutathione peroxidase) (Selenium-dependent glutathione peroxidase 1)	3	4	4	29.9	22.329	45046000	58752000	48237000	38342000	36310000	39906000	0.753498	0.042986
sp|Q78IK4|MIC27_MOUSE;tr|Q9CZB4|Q9CZB4_MOUSE;tr|B1AV14|B1AV14_MOUSE	sp|Q78IK4|MIC27_MOUSE;tr|Q9CZB4|Q9CZB4_MOUSE;tr|B1AV14|B1AV14_MOUSE	sp|Q78IK4|MIC27_MOUSE MICOS complex subunit Mic27 OS=Mus musculus OX=10090 GN=Apool PE=1 SV=1;tr|Q9CZB4|Q9CZB4_MOUSE MICOS complex subunit OS=Mus musculus OX=10090 GN=Apool PE=2 SV=1;tr|B1AV14|B1AV14_MOUSE MICOS complex subunit OS=Mus musculus OX=10090 GN=	Q78IK4	Apool Fam121a Mic27	MICOS complex subunit Mic27 (Apolipoprotein O-like) (Protein FAM121A)	3	9	9	42.6	29.26	219280000	219350000	231980000	205050000	207840000	185140000	0.89177	0.0434803
sp|Q9EQ06|DHB11_MOUSE;tr|A8Y5N4|A8Y5N4_MOUSE;sp|Q8VCR2|DHB13_MOUSE	sp|Q9EQ06|DHB11_MOUSE	sp|Q9EQ06|DHB11_MOUSE Estradiol 17-beta-dehydrogenase 11 OS=Mus musculus OX=10090 GN=Hsd17b11 PE=1 SV=1	Q9EQ06	Hsd17b11 Dhrs8 Pan1b	Estradiol 17-beta-dehydrogenase 11 (EC 1.1.1.62) (17-beta-hydroxysteroid dehydrogenase 11) (17-beta-HSD 11) (17bHSD11) (17betaHSD11) (17-beta-hydroxysteroid dehydrogenase XI) (17-beta-HSD XI) (17betaHSDXI) (Dehydrogenase/reductase SDR family member 8)	3	9	9	37.6	32.88	99711000	145730000	139110000	162290000	186830000	175410000	1.36401	0.0435526
sp|Q91V61|SFXN3_MOUSE;tr|Q3U4F0|Q3U4F0_MOUSE	sp|Q91V61|SFXN3_MOUSE;tr|Q3U4F0|Q3U4F0_MOUSE	sp|Q91V61|SFXN3_MOUSE Sideroflexin-3 OS=Mus musculus OX=10090 GN=Sfxn3 PE=1 SV=1;tr|Q3U4F0|Q3U4F0_MOUSE Sideroflexin-3 OS=Mus musculus OX=10090 GN=Sfxn3 PE=1 SV=1	Q91V61	Sfxn3	Sideroflexin-3	2	9	9	40.5	35.406	176510000	177620000	184090000	172130000	151450000	152920000	0.885326	0.043657
tr|K3W4L0|K3W4L0_MOUSE;tr|B2RRE2|B2RRE2_MOUSE;sp|Q9JMH9|MY18A_MOUSE;tr|E9QAX2|E9QAX2_MOUSE;tr|E9Q405|E9Q405_MOUSE;tr|A0A1C7ZN10|A0A1C7ZN10_MOUSE;tr|E9QA74|E9QA74_MOUSE;tr|Q3UIM4|Q3UIM4_MOUSE;tr|Q6PER1|Q6PER1_MOUSE	tr|K3W4L0|K3W4L0_MOUSE;tr|B2RRE2|B2RRE2_MOUSE;sp|Q9JMH9|MY18A_MOUSE;tr|E9QAX2|E9QAX2_MOUSE;tr|E9Q405|E9Q405_MOUSE;tr|A0A1C7ZN10|A0A1C7ZN10_MOUSE;tr|E9QA74|E9QA74_MOUSE	tr|K3W4L0|K3W4L0_MOUSE Unconventional myosin-XVIIIa OS=Mus musculus OX=10090 GN=Myo18a PE=1 SV=1;tr|B2RRE2|B2RRE2_MOUSE Myo18a protein OS=Mus musculus OX=10090 GN=Myo18a PE=1 SV=1;sp|Q9JMH9|MY18A_MOUSE Unconventional myosin-XVIIIa OS=Mus musculus OX=10090	K3W4L0	Myo18a	Unconventional myosin-XVIIIa	9	39	39	26.2	230.99	239300000	247050000	261660000	267430000	315230000	313820000	1.19849	0.0437532
tr|Q3TUQ8|Q3TUQ8_MOUSE;tr|A0A0R4J0P6|A0A0R4J0P6_MOUSE;sp|Q8VDG3|PARN_MOUSE;tr|A0A2R8VKA3|A0A2R8VKA3_MOUSE	tr|Q3TUQ8|Q3TUQ8_MOUSE;tr|A0A0R4J0P6|A0A0R4J0P6_MOUSE;sp|Q8VDG3|PARN_MOUSE	tr|Q3TUQ8|Q3TUQ8_MOUSE Uncharacterized protein OS=Mus musculus OX=10090 GN=Parn PE=2 SV=1;tr|A0A0R4J0P6|A0A0R4J0P6_MOUSE Poly(A)-specific ribonuclease PARN OS=Mus musculus OX=10090 GN=Parn PE=1 SV=1;sp|Q8VDG3|PARN_MOUSE Poly(A)-specific ribonuclease PARN O	Q3TUQ8	Parn	R3H domain-containing protein	4	6	6	11.7	71.574	NaN	51231000	49957000	75975000	81365000	63467000	1.45476	0.0439322
sp|Q925I1|ATAD3_MOUSE;tr|H3BKI6|H3BKI6_MOUSE;tr|H3BK90|H3BK90_MOUSE;tr|V9GWS5|V9GWS5_MOUSE;tr|V9GWS6|V9GWS6_MOUSE	sp|Q925I1|ATAD3_MOUSE	sp|Q925I1|ATAD3_MOUSE ATPase family AAA domain-containing protein 3 OS=Mus musculus OX=10090 GN=Atad3 PE=1 SV=1	Q925I1	Atad3 Atad3a Kiaa1273	ATPase family AAA domain-containing protein 3 (AAA-ATPase TOB3)	5	25	25	48.1	66.741	621350000	630630000	583440000	661040000	686910000	647890000	1.0874	0.0440648
sp|O70591|PFD2_MOUSE;tr|F8WJ30|F8WJ30_MOUSE	sp|O70591|PFD2_MOUSE;tr|F8WJ30|F8WJ30_MOUSE	sp|O70591|PFD2_MOUSE Prefoldin subunit 2 OS=Mus musculus OX=10090 GN=Pfdn2 PE=1 SV=2;tr|F8WJ30|F8WJ30_MOUSE Prefoldin subunit 2 (Fragment) OS=Mus musculus OX=10090 GN=Pfdn2 PE=1 SV=1	O70591	Pfdn2 Pfd2	Prefoldin subunit 2	2	6	6	39.6	16.534	70750000	69728000	88145000	96274000	90459000	96851000	1.2404	0.0440697
sp|E9Q5F9|SETD2_MOUSE;tr|A0A0G2JH06|A0A0G2JH06_MOUSE;tr|A0A0G2JEZ4|A0A0G2JEZ4_MOUSE;tr|A0A0G2JEW8|A0A0G2JEW8_MOUSE;tr|Q8BL12|Q8BL12_MOUSE;tr|A0A0G2JDY1|A0A0G2JDY1_MOUSE	sp|E9Q5F9|SETD2_MOUSE	sp|E9Q5F9|SETD2_MOUSE Histone-lysine N-methyltransferase SETD2 OS=Mus musculus OX=10090 GN=Setd2 PE=1 SV=1	E9Q5F9	Setd2 Kiaa1732 Kmt3a	Histone-lysine N-methyltransferase SETD2 (EC 2.1.1.43) (Lysine N-methyltransferase 3A) (Protein-lysine N-methyltransferase SETD2) (EC 2.1.1.-) (SET domain-containing protein 2)	6	11	11	6	285.66	28324000	33438000	30240000	33986000	40859000	40067000	1.24902	0.0441566
sp|Q9QWF0|CAF1A_MOUSE;tr|Q3UXB7|Q3UXB7_MOUSE;tr|A0A3B2WD19|A0A3B2WD19_MOUSE	sp|Q9QWF0|CAF1A_MOUSE	sp|Q9QWF0|CAF1A_MOUSE Chromatin assembly factor 1 subunit A OS=Mus musculus OX=10090 GN=Chaf1a PE=1 SV=1	Q9QWF0	Chaf1a Caip150	Chromatin assembly factor 1 subunit A (CAF-1 subunit A) (Chromatin assembly factor I p150 subunit) (CAF-I 150 kDa subunit) (CAF-I p150)	3	12	12	22.9	101.93	116790000	119890000	135980000	148670000	137040000	148500000	1.16516	0.044292
sp|Q8BIQ5|CSTF2_MOUSE;tr|B3V097|B3V097_MOUSE;tr|A2AEK1|A2AEK1_MOUSE;tr|B3V099|B3V099_MOUSE;tr|A2AEJ8|A2AEJ8_MOUSE;tr|A2AEK3|A2AEK3_MOUSE;sp|Q8C7E9|CSTFT_MOUSE;tr|F6ZKC7|F6ZKC7_MOUSE	sp|Q8BIQ5|CSTF2_MOUSE;tr|B3V097|B3V097_MOUSE;tr|A2AEK1|A2AEK1_MOUSE;tr|B3V099|B3V099_MOUSE	sp|Q8BIQ5|CSTF2_MOUSE Cleavage stimulation factor subunit 2 OS=Mus musculus OX=10090 GN=Cstf2 PE=1 SV=2;tr|B3V097|B3V097_MOUSE BetaCstF-64 variant 3 OS=Mus musculus OX=10090 GN=Cstf2 PE=2 SV=1;tr|A2AEK1|A2AEK1_MOUSE AlphaCstF-64 variant 4 OS=Mus musculus O	Q8BIQ5	Cstf2	Cleavage stimulation factor subunit 2 (CF-1 64 kDa subunit) (Cleavage stimulation factor 64 kDa subunit) (CSTF 64 kDa subunit) (CstF-64)	8	15	15	42.4	61.341	287960000	270420000	289950000	359320000	309610000	320830000	1.16672	0.0443157
sp|Q8C1E7|T120A_MOUSE;tr|D3Z0U3|D3Z0U3_MOUSE	sp|Q8C1E7|T120A_MOUSE;tr|D3Z0U3|D3Z0U3_MOUSE	sp|Q8C1E7|T120A_MOUSE Transmembrane protein 120A OS=Mus musculus OX=10090 GN=Tmem120a PE=1 SV=1;tr|D3Z0U3|D3Z0U3_MOUSE Transmembrane protein 120A (Fragment) OS=Mus musculus OX=10090 GN=Tmem120a PE=1 SV=8	Q8C1E7	Tmem120a Net29 Tmpit	Transmembrane protein 120A (Transmembrane protein induced by tumor necrosis factor alpha)	2	7	7	27.1	40.751	81839000	82809000	78349000	77640000	72225000	75158000	0.926032	0.0443426
tr|Q3U7I9|Q3U7I9_MOUSE;tr|F8WIR1|F8WIR1_MOUSE;tr|Q3UCD9|Q3UCD9_MOUSE;tr|Q3UAQ1|Q3UAQ1_MOUSE;tr|Q3U7P0|Q3U7P0_MOUSE;tr|Q3TXL5|Q3TXL5_MOUSE;tr|Q3TWR6|Q3TWR6_MOUSE;tr|Q3TWD0|Q3TWD0_MOUSE;sp|P18242|CATD_MOUSE;tr|Q8C243|Q8C243_MOUSE;tr|Q3UC89|Q3UC89_MOUSE;tr|Q3U8W5|Q3U8W5_MOUSE;tr|Q3U651|Q3U651_MOUSE;tr|Q3TJN3|Q3TJN3_MOUSE;tr|Q3UCW4|Q3UCW4_MOUSE;tr|Q3TIR0|Q3TIR0_MOUSE;tr|F6Y6L6|F6Y6L6_MOUSE;tr|Q3TWL1|…	tr|Q3U7I9|Q3U7I9_MOUSE;tr|F8WIR1|F8WIR1_MOUSE;tr|Q3UCD9|Q3UCD9_MOUSE;tr|Q3UAQ1|Q3UAQ1_MOUSE;tr|Q3U7P0|Q3U7P0_MOUSE;tr|Q3TXL5|Q3TXL5_MOUSE;tr|Q3TWR6|Q3TWR6_MOUSE;tr|Q3TWD0|Q3TWD0_MOUSE;sp|P18242|CATD_MOUSE;tr|Q8C243|Q8C243_MOUSE;tr|Q3UC89|Q3UC89_MOUSE;tr|Q3U8W5|Q3U8W5_MOUSE;tr|Q3U651|Q3U651_MOUSE;tr|Q3TJN3|Q3TJN3_MOUSE;tr|Q3UCW4|Q3UCW4_MOUSE;tr|Q3TIR0|Q3TIR0_MOUSE;tr|F6Y6L6|F6Y6L6_MOUSE;tr|Q3TWL1|…	tr|Q3U7I9|Q3U7I9_MOUSE Uncharacterized protein OS=Mus musculus OX=10090 GN=Ctsd PE=2 SV=1;tr|F8WIR1|F8WIR1_MOUSE Cathepsin D OS=Mus musculus OX=10090 GN=Ctsd PE=1 SV=2;tr|Q3UCD9|Q3UCD9_MOUSE Cathepsin D, isoform CRA_a OS=Mus musculus OX=10090 GN=Ctsd PE=1	Q3U7I9	Ctsd	Peptidase A1 domain-containing protein	21	9	9	31.2	44.314	128190000	135460000	130610000	125430000	110490000	116280000	0.893319	0.0444203
tr|Q6RJ38|Q6RJ38_MOUSE;tr|Q31154|Q31154_MOUSE;tr|A0A2Z4SYZ7|A0A2Z4SYZ7_MOUSE;tr|A0A2Z4SXP9|A0A2Z4SXP9_MOUSE;tr|F2WVG9|F2WVG9_MOUSE;tr|F2WVG7|F2WVG7_MOUSE;tr|F2WVG6|F2WVG6_MOUSE;tr|Q31210|Q31210_MOUSE;tr|Q9QWF4|Q9QWF4_MOUSE;tr|A0A2Z4T2J9|A0A2Z4T2J9_MOUSE;tr|A0A2Z4SY98|A0A2Z4SY98_MOUSE;tr|A0A2Z4SXC3|A0A2Z4SXC3_MOUSE;tr|Q8WM98|Q8WM98_MOUSE;tr|Q31216|Q31216_MOUSE;tr|Q62142|Q62142_MOUSE	tr|Q6RJ38|Q6RJ38_MOUSE;tr|Q31154|Q31154_MOUSE	tr|Q6RJ38|Q6RJ38_MOUSE MHC class I heavy chain maturation peptide H-2D(D) (Fragment) OS=Mus musculus OX=10090 GN=H2-D1 PE=2 SV=1;tr|Q31154|Q31154_MOUSE MHC H2-K-d transplantation antigen H2-Kd (Fragment) OS=Mus musculus OX=10090 GN=H2-D1 PE=2 SV=1	Q6RJ38	H2-D1 H2-Q2	MHC class I heavy chain maturation peptide H-2D(D) (Fragment)	15	16	0	51.5	38.776	706920000	706870000	611350000	571630000	580130000	592980000	0.86154	0.0449874
sp|Q8VCH8|UBXN4_MOUSE;tr|A0A0R4J078|A0A0R4J078_MOUSE;tr|Q3ULE5|Q3ULE5_MOUSE;tr|Q3UFS2|Q3UFS2_MOUSE;tr|Q05C23|Q05C23_MOUSE;tr|Q6ZQF6|Q6ZQF6_MOUSE;tr|Q9CRQ1|Q9CRQ1_MOUSE;tr|Q8C0Z0|Q8C0Z0_MOUSE;tr|A0A087WSK5|A0A087WSK5_MOUSE;tr|Q9CT42|Q9CT42_MOUSE	sp|Q8VCH8|UBXN4_MOUSE;tr|A0A0R4J078|A0A0R4J078_MOUSE;tr|Q3ULE5|Q3ULE5_MOUSE	sp|Q8VCH8|UBXN4_MOUSE UBX domain-containing protein 4 OS=Mus musculus OX=10090 GN=Ubxn4 PE=1 SV=1;tr|A0A0R4J078|A0A0R4J078_MOUSE UBX domain containing 2, isoform CRA_a OS=Mus musculus OX=10090 GN=Ubxn4 PE=1 SV=1;tr|Q3ULE5|Q3ULE5_MOUSE Uncharacterized prote	Q8VCH8	Ubxn4 Ubxd2 Ubxdc1	UBX domain-containing protein 4 (Erasin) (UBX domain-containing protein 2)	10	9	9	32.4	56.471	292030000	296460000	279390000	303240000	319790000	334520000	1.10332	0.0450557
tr|B7ZNR0|B7ZNR0_MOUSE;tr|Q9QX30|Q9QX30_MOUSE;tr|Q3TDX7|Q3TDX7_MOUSE;sp|Q61508|ECM1_MOUSE;tr|Q3TXB7|Q3TXB7_MOUSE;tr|F8WI14|F8WI14_MOUSE;tr|Q9Z2R8|Q9Z2R8_MOUSE;tr|D3YV22|D3YV22_MOUSE;tr|D3Z0U9|D3Z0U9_MOUSE;tr|D3Z038|D3Z038_MOUSE	tr|B7ZNR0|B7ZNR0_MOUSE;tr|Q9QX30|Q9QX30_MOUSE;tr|Q3TDX7|Q3TDX7_MOUSE;sp|Q61508|ECM1_MOUSE;tr|Q3TXB7|Q3TXB7_MOUSE;tr|F8WI14|F8WI14_MOUSE;tr|Q9Z2R8|Q9Z2R8_MOUSE	tr|B7ZNR0|B7ZNR0_MOUSE Ecm1 protein OS=Mus musculus OX=10090 GN=Ecm1 PE=2 SV=1;tr|Q9QX30|Q9QX30_MOUSE Extracellular matrix protein OS=Mus musculus OX=10090 PE=4 SV=1;tr|Q3TDX7|Q3TDX7_MOUSE Extracellular matrix protein 1 OS=Mus musculus OX=10090 GN=Ecm1 PE=	B7ZNR0	Ecm1	Ecm1 protein	10	4	4	10.6	62.718	34613000	38473000	29587000	41721000	40703000	44323000	1.23447	0.0451465
sp|Q921S7|RM37_MOUSE	sp|Q921S7|RM37_MOUSE	sp|Q921S7|RM37_MOUSE 39S ribosomal protein L37, mitochondrial OS=Mus musculus OX=10090 GN=Mrpl37 PE=1 SV=1	Q921S7	Mrpl37	39S ribosomal protein L37, mitochondrial (L37mt) (MRP-L37)	1	18	18	44.7	48.34	220620000	222410000	218100000	244580000	248460000	226750000	1.08873	0.0452256
sp|Q8BMS1|ECHA_MOUSE;tr|Q3TB39|Q3TB39_MOUSE	sp|Q8BMS1|ECHA_MOUSE;tr|Q3TB39|Q3TB39_MOUSE	sp|Q8BMS1|ECHA_MOUSE Trifunctional enzyme subunit alpha, mitochondrial OS=Mus musculus OX=10090 GN=Hadha PE=1 SV=1;tr|Q3TB39|Q3TB39_MOUSE Uncharacterized protein (Fragment) OS=Mus musculus OX=10090 GN=Hadha PE=2 SV=1	Q8BMS1	Hadha	Trifunctional enzyme subunit alpha, mitochondrial (Monolysocardiolipin acyltransferase) (EC 2.3.1.-) (TP-alpha) [Includes: Long-chain enoyl-CoA hydratase (EC 4.2.1.17); Long chain 3-hydroxyacyl-CoA dehydrogenase (EC 1.1.1.211)]	2	35	35	62	82.669	2754800000	2693200000	2558400000	2457900000	2541100000	2443400000	0.929556	0.0454512
tr|Q3TM67|Q3TM67_MOUSE;sp|Q9ESX5|DKC1_MOUSE;tr|Q3TI79|Q3TI79_MOUSE;tr|B7ZCL7|B7ZCL7_MOUSE;tr|F6YUI5|F6YUI5_MOUSE;tr|A2AN81|A2AN81_MOUSE;tr|F6S1S5|F6S1S5_MOUSE	tr|Q3TM67|Q3TM67_MOUSE;sp|Q9ESX5|DKC1_MOUSE;tr|Q3TI79|Q3TI79_MOUSE;tr|B7ZCL7|B7ZCL7_MOUSE	tr|Q3TM67|Q3TM67_MOUSE Uncharacterized protein OS=Mus musculus OX=10090 GN=Dkc1 PE=2 SV=1;sp|Q9ESX5|DKC1_MOUSE H/ACA ribonucleoprotein complex subunit DKC1 OS=Mus musculus OX=10090 GN=Dkc1 PE=1 SV=4;tr|Q3TI79|Q3TI79_MOUSE Uncharacterized protein OS=Mus mus	Q3TM67	Dkc1 BC068171	PUA domain-containing protein	7	28	28	61.1	57.401	1645300000	1755100000	1589100000	1495700000	1490100000	1551400000	0.90935	0.0454542
sp|Q05186|RCN1_MOUSE	sp|Q05186|RCN1_MOUSE	sp|Q05186|RCN1_MOUSE Reticulocalbin-1 OS=Mus musculus OX=10090 GN=Rcn1 PE=1 SV=1	Q05186	Rcn1 Rca1 Rcn	Reticulocalbin-1	1	12	12	51.7	38.113	590230000	548680000	527860000	503190000	470520000	506710000	0.888197	0.0455266
sp|Q9CPQ8|ATP5L_MOUSE;tr|Q9D037|Q9D037_MOUSE;tr|Q9CQY3|Q9CQY3_MOUSE;tr|J3QNM7|J3QNM7_MOUSE	sp|Q9CPQ8|ATP5L_MOUSE;tr|Q9D037|Q9D037_MOUSE;tr|Q9CQY3|Q9CQY3_MOUSE	sp|Q9CPQ8|ATP5L_MOUSE ATP synthase subunit g, mitochondrial OS=Mus musculus OX=10090 GN=Atp5mg PE=1 SV=1;tr|Q9D037|Q9D037_MOUSE ATP synthase subunit OS=Mus musculus OX=10090 GN=Atp5l PE=2 SV=1;tr|Q9CQY3|Q9CQY3_MOUSE Uncharacterized protein OS=Mus musculus	Q9CPQ8	Atp5mg Atp5l	ATP synthase subunit g, mitochondrial (ATPase subunit g) (ATP synthase membrane subunit g)	4	5	5	49.5	11.424	425720000	410750000	351430000	516070000	488910000	445720000	1.22123	0.0456441
tr|Q3UQL2|Q3UQL2_MOUSE;sp|O88543|CSN3_MOUSE;tr|Q3TEA5|Q3TEA5_MOUSE;tr|Q8BX58|Q8BX58_MOUSE;tr|D3Z036|D3Z036_MOUSE;tr|F6YCA7|F6YCA7_MOUSE	tr|Q3UQL2|Q3UQL2_MOUSE;sp|O88543|CSN3_MOUSE;tr|Q3TEA5|Q3TEA5_MOUSE	tr|Q3UQL2|Q3UQL2_MOUSE Uncharacterized protein OS=Mus musculus OX=10090 GN=Cops3 PE=1 SV=1;sp|O88543|CSN3_MOUSE COP9 signalosome complex subunit 3 OS=Mus musculus OX=10090 GN=Cops3 PE=1 SV=3;tr|Q3TEA5|Q3TEA5_MOUSE Uncharacterized protein (Fragment) OS=Mus	Q3UQL2	Cops3	PCI domain-containing protein	6	7	7	24.6	47.832	64179000	64038000	74828000	87951000	76228000	81232000	1.20865	0.0457169
tr|Q80X98|Q80X98_MOUSE;tr|Q6A0A1|Q6A0A1_MOUSE;tr|Q8R1J6|Q8R1J6_MOUSE	tr|Q80X98|Q80X98_MOUSE;tr|Q6A0A1|Q6A0A1_MOUSE	tr|Q80X98|Q80X98_MOUSE DEAH (Asp-Glu-Ala-His) box polypeptide 38 OS=Mus musculus OX=10090 GN=Dhx38 PE=1 SV=1;tr|Q6A0A1|Q6A0A1_MOUSE MKIAA0224 protein (Fragment) OS=Mus musculus OX=10090 GN=mKIAA0224 PE=4 SV=1	Q80X98	Dhx38	DEAH (Asp-Glu-Ala-His) box polypeptide 38	3	12	12	13.4	140.62	33845000	34513000	35713000	37859000	38688000	35941000	1.08088	0.0457957
sp|Q9DCS3|MECR_MOUSE;tr|A2A845|A2A845_MOUSE	sp|Q9DCS3|MECR_MOUSE;tr|A2A845|A2A845_MOUSE	sp|Q9DCS3|MECR_MOUSE Enoyl-[acyl-carrier-protein] reductase, mitochondrial OS=Mus musculus OX=10090 GN=Mecr PE=1 SV=2;tr|A2A845|A2A845_MOUSE Enoyl-[acyl-carrier-protein] reductase, mitochondrial (Fragment) OS=Mus musculus OX=10090 GN=Mecr PE=1 SV=1	Q9DCS3	Mecr Nrbf1	Enoyl-[acyl-carrier-protein] reductase, mitochondrial (EC 1.3.1.104) (2-enoyl thioester reductase) (Nuclear receptor-binding factor 1) (NRBF-1)	2	11	11	53.6	40.342	243650000	222930000	220910000	205440000	212230000	197220000	0.894398	0.0459666
sp|E9PVX6|KI67_MOUSE;tr|A0A1B0GQV9|A0A1B0GQV9_MOUSE	sp|E9PVX6|KI67_MOUSE	sp|E9PVX6|KI67_MOUSE Proliferation marker protein Ki-67 OS=Mus musculus OX=10090 GN=Mki67 PE=1 SV=1	E9PVX6	Mki67	Proliferation marker protein Ki-67 (Antigen identified by monoclonal antibody Ki-67 homolog) (Antigen KI-67 homolog) (Antigen Ki67 homolog)	2	158	158	62	350.86	4464700000	4656100000	4554300000	4728900000	4706700000	4852000000	1.04479	0.0459686
tr|Q542I7|Q542I7_MOUSE;tr|Q3TX23|Q3TX23_MOUSE;sp|O88653|LTOR3_MOUSE;tr|A0A0G2JGQ3|A0A0G2JGQ3_MOUSE	tr|Q542I7|Q542I7_MOUSE;tr|Q3TX23|Q3TX23_MOUSE;sp|O88653|LTOR3_MOUSE	tr|Q542I7|Q542I7_MOUSE MCG121084 OS=Mus musculus OX=10090 GN=Lamtor3 PE=1 SV=1;tr|Q3TX23|Q3TX23_MOUSE Uncharacterized protein OS=Mus musculus OX=10090 GN=Lamtor3 PE=2 SV=1;sp|O88653|LTOR3_MOUSE Ragulator complex protein LAMTOR3 OS=Mus musculus OX=10090 GN=	Q542I7	Lamtor3 mCG_121084 mCG_4114	MCG121084 (MCG4114, isoform CRA_a)	4	3	3	44.4	13.553	147260000	171310000	125420000	118210000	98765000	81183000	0.671542	0.0461783
sp|Q99L13|3HIDH_MOUSE;tr|A0ZNJ2|A0ZNJ2_MOUSE	sp|Q99L13|3HIDH_MOUSE;tr|A0ZNJ2|A0ZNJ2_MOUSE	sp|Q99L13|3HIDH_MOUSE 3-hydroxyisobutyrate dehydrogenase, mitochondrial OS=Mus musculus OX=10090 GN=Hibadh PE=1 SV=1;tr|A0ZNJ2|A0ZNJ2_MOUSE 3-hydroxyisobutyrate dehydrogenase OS=Mus musculus OX=10090 GN=Hibadh PE=2 SV=1	Q99L13	Hibadh	3-hydroxyisobutyrate dehydrogenase, mitochondrial (HIBADH) (EC 1.1.1.31)	2	11	11	41.8	35.44	154220000	156830000	149210000	146230000	145200000	148240000	0.955264	0.0463514
tr|A0A068EW80|A0A068EW80_MOUSE;sp|Q60953|PML_MOUSE;tr|D3Z3A6|D3Z3A6_MOUSE;tr|D3YXR5|D3YXR5_MOUSE;tr|F7BTZ2|F7BTZ2_MOUSE;tr|Q8BSJ6|Q8BSJ6_MOUSE;tr|D3Z2V0|D3Z2V0_MOUSE	tr|A0A068EW80|A0A068EW80_MOUSE;sp|Q60953|PML_MOUSE;tr|D3Z3A6|D3Z3A6_MOUSE;tr|D3YXR5|D3YXR5_MOUSE;tr|F7BTZ2|F7BTZ2_MOUSE	tr|A0A068EW80|A0A068EW80_MOUSE Promyelocytic leukemia OS=Mus musculus OX=10090 GN=Pml PE=2 SV=1;sp|Q60953|PML_MOUSE Protein PML OS=Mus musculus OX=10090 GN=Pml PE=1 SV=3;tr|D3Z3A6|D3Z3A6_MOUSE Protein PML OS=Mus musculus OX=10090 GN=Pml PE=1 SV=1;tr|D3YXR5	A0A068EW80	Pml	Promyelocytic leukemia	7	13	13	21.1	98.241	55534000	59789000	62783000	68123000	63834000	67376000	1.11918	0.0464975
sp|P49452|CENPC_MOUSE;tr|Q3UUX2|Q3UUX2_MOUSE;tr|Q9CRZ7|Q9CRZ7_MOUSE;tr|Q3UPF6|Q3UPF6_MOUSE	sp|P49452|CENPC_MOUSE;tr|Q3UUX2|Q3UUX2_MOUSE;tr|Q9CRZ7|Q9CRZ7_MOUSE;tr|Q3UPF6|Q3UPF6_MOUSE	sp|P49452|CENPC_MOUSE Centromere protein C OS=Mus musculus OX=10090 GN=Cenpc PE=1 SV=2;tr|Q3UUX2|Q3UUX2_MOUSE Uncharacterized protein OS=Mus musculus OX=10090 GN=Cenpc1 PE=2 SV=1;tr|Q9CRZ7|Q9CRZ7_MOUSE Uncharacterized protein (Fragment) OS=Mus musculus OX=	P49452	Cenpc Cenpc1	Centromere protein C (CENP-C) (Centromere autoantigen C) (Centromere protein C 1) (CENP-C 1)	4	6	6	7.5	102.15	19080000	18048000	15720000	28299000	22779000	NaN	1.44976	0.0468472
tr|Q3UGW4|Q3UGW4_MOUSE;sp|O88696|CLPP_MOUSE;tr|Q8CF81|Q8CF81_MOUSE	tr|Q3UGW4|Q3UGW4_MOUSE;sp|O88696|CLPP_MOUSE;tr|Q8CF81|Q8CF81_MOUSE	tr|Q3UGW4|Q3UGW4_MOUSE ATP-dependent Clp protease proteolytic subunit (Fragment) OS=Mus musculus OX=10090 GN=Clpp PE=2 SV=1;sp|O88696|CLPP_MOUSE ATP-dependent Clp protease proteolytic subunit, mitochondrial OS=Mus musculus OX=10090 GN=Clpp PE=1 SV=1;tr|Q8C	Q3UGW4	Clpp	ATP-dependent Clp protease proteolytic subunit (EC 3.4.21.92) (Fragment)	3	7	7	30.5	29.386	326080000	287710000	260080000	346420000	347680000	398690000	1.25052	0.0471138
sp|P28862|MMP3_MOUSE;tr|Q922W6|Q922W6_MOUSE;tr|Q3UFJ0|Q3UFJ0_MOUSE;tr|A1L3D0|A1L3D0_MOUSE;sp|O55123|MMP10_MOUSE	sp|P28862|MMP3_MOUSE;tr|Q922W6|Q922W6_MOUSE;tr|Q3UFJ0|Q3UFJ0_MOUSE	sp|P28862|MMP3_MOUSE Stromelysin-1 OS=Mus musculus OX=10090 GN=Mmp3 PE=2 SV=2;tr|Q922W6|Q922W6_MOUSE MCG9886 OS=Mus musculus OX=10090 GN=Mmp3 PE=1 SV=1;tr|Q3UFJ0|Q3UFJ0_MOUSE Uncharacterized protein OS=Mus musculus OX=10090 GN=Mmp3 PE=2 SV=1	P28862	Mmp3	Stromelysin-1 (SL-1) (EC 3.4.24.17) (EMS-2) (Matrix metalloproteinase-3) (MMP-3) (Transin-1)	5	9	9	24.3	53.844	73193000	60763000	51378000	46791000	41622000	41076000	0.698679	0.0472888
tr|Q3UQM7|Q3UQM7_MOUSE;sp|Q9Z127|LAT1_MOUSE;tr|Q3UG45|Q3UG45_MOUSE	tr|Q3UQM7|Q3UQM7_MOUSE;sp|Q9Z127|LAT1_MOUSE	tr|Q3UQM7|Q3UQM7_MOUSE Uncharacterized protein OS=Mus musculus OX=10090 GN=Slc7a5 PE=2 SV=1;sp|Q9Z127|LAT1_MOUSE Large neutral amino acids transporter small subunit 1 OS=Mus musculus OX=10090 GN=Slc7a5 PE=1 SV=2	Q3UQM7	Slc7a5	Uncharacterized protein	3	5	4	12.7	55.872	147540000	143360000	126660000	155490000	156730000	164040000	1.14058	0.0473409
sp|P23798|PCGF2_MOUSE	sp|P23798|PCGF2_MOUSE	sp|P23798|PCGF2_MOUSE Polycomb group RING finger protein 2 OS=Mus musculus OX=10090 GN=Pcgf2 PE=1 SV=2	P23798	Pcgf2 Mel-18 Mel18 Rnf110 Zfp144 Znf144	Polycomb group RING finger protein 2 (DNA-binding protein Mel-18) (Melanoma nuclear protein 18) (RING finger protein 110) (Zinc finger protein 144) (Zfp-144)	1	5	3	16.7	37.723	38253000	48279000	40895000	51240000	52011000	61220000	1.29071	0.0482069
sp|Q8BRF7|SCFD1_MOUSE;tr|A0A1W2P6R7|A0A1W2P6R7_MOUSE;tr|Q6ZQ26|Q6ZQ26_MOUSE	sp|Q8BRF7|SCFD1_MOUSE	sp|Q8BRF7|SCFD1_MOUSE Sec1 family domain-containing protein 1 OS=Mus musculus OX=10090 GN=Scfd1 PE=1 SV=1	Q8BRF7	Scfd1 Stxbp1l2	Sec1 family domain-containing protein 1 (Syntaxin-binding protein 1-like 2)	3	18	18	36.6	72.322	373370000	362550000	350680000	375710000	395630000	402800000	1.08056	0.0488108
sp|Q8R3N6|THOC1_MOUSE;tr|A0A3Q4EBV8|A0A3Q4EBV8_MOUSE;tr|Q3UTN0|Q3UTN0_MOUSE	sp|Q8R3N6|THOC1_MOUSE;tr|A0A3Q4EBV8|A0A3Q4EBV8_MOUSE;tr|Q3UTN0|Q3UTN0_MOUSE	sp|Q8R3N6|THOC1_MOUSE THO complex subunit 1 OS=Mus musculus OX=10090 GN=Thoc1 PE=1 SV=1;tr|A0A3Q4EBV8|A0A3Q4EBV8_MOUSE THO complex subunit 1 (Fragment) OS=Mus musculus OX=10090 GN=Thoc1 PE=1 SV=1;tr|Q3UTN0|Q3UTN0_MOUSE Uncharacterized protein (Fragment) OS	Q8R3N6	Thoc1 Hpr1	THO complex subunit 1 (Tho1) (Nuclear matrix protein p84)	3	22	22	48.4	75.435	345360000	356170000	323360000	372530000	365720000	393180000	1.10395	0.0490184
sp|Q9CQ91|NDUA3_MOUSE;tr|D3Z670|D3Z670_MOUSE	sp|Q9CQ91|NDUA3_MOUSE;tr|D3Z670|D3Z670_MOUSE	sp|Q9CQ91|NDUA3_MOUSE NADH dehydrogenase [ubiquinone] 1 alpha subcomplex subunit 3 OS=Mus musculus OX=10090 GN=Ndufa3 PE=1 SV=1;tr|D3Z670|D3Z670_MOUSE NADH dehydrogenase [ubiquinone] 1 alpha subcomplex subunit 3 OS=Mus musculus OX=10090 GN=Ndufa3 PE=1 SV=1	Q9CQ91	Ndufa3	NADH dehydrogenase [ubiquinone] 1 alpha subcomplex subunit 3 (Complex I-B9) (CI-B9) (NADH-ubiquinone oxidoreductase B9 subunit)	2	3	3	50	9.3308	95584000	107000000	95694000	90747000	73833000	67564000	0.778281	0.0491398
sp|Q9Z1F9|SAE2_MOUSE;tr|H3BLR3|H3BLR3_MOUSE;tr|H3BLM2|H3BLM2_MOUSE	sp|Q9Z1F9|SAE2_MOUSE	sp|Q9Z1F9|SAE2_MOUSE SUMO-activating enzyme subunit 2 OS=Mus musculus OX=10090 GN=Uba2 PE=1 SV=1	Q9Z1F9	Uba2 Sae2 Uble1b	SUMO-activating enzyme subunit 2 (EC 2.3.2.-) (Anthracycline-associated resistance ARX) (Ubiquitin-like 1-activating enzyme E1B) (Ubiquitin-like modifier-activating enzyme 2)	3	9	9	20.1	70.568	72886000	77994000	87843000	110460000	112580000	88898000	1.30669	0.0493008
sp|Q9D898|ARP5L_MOUSE	sp|Q9D898|ARP5L_MOUSE	sp|Q9D898|ARP5L_MOUSE Actin-related protein 2/3 complex subunit 5-like protein OS=Mus musculus OX=10090 GN=Arpc5l PE=1 SV=1	Q9D898	Arpc5l	Actin-related protein 2/3 complex subunit 5-like protein (Arp2/3 complex 16 kDa subunit 2) (ARC16-2)	1	4	4	53.6	16.98	55413000	53466000	53944000	64241000	59728000	73744000	1.21428	0.0494313
tr|A2ASR7|A2ASR7_MOUSE;tr|A2ASR8|A2ASR8_MOUSE;tr|Q3ULL2|Q3ULL2_MOUSE;tr|Q2LC58|Q2LC58_MOUSE;sp|P25916|BMI1_MOUSE;tr|A2ASR6|A2ASR6_MOUSE;tr|A2ASR5|A2ASR5_MOUSE	tr|A2ASR7|A2ASR7_MOUSE;tr|A2ASR8|A2ASR8_MOUSE;tr|Q3ULL2|Q3ULL2_MOUSE;tr|Q2LC58|Q2LC58_MOUSE;sp|P25916|BMI1_MOUSE;tr|A2ASR6|A2ASR6_MOUSE	tr|A2ASR7|A2ASR7_MOUSE Polycomb complex protein BMI-1 (Fragment) OS=Mus musculus OX=10090 GN=Bmi1 PE=1 SV=1;tr|A2ASR8|A2ASR8_MOUSE Polycomb complex protein BMI-1 (Fragment) OS=Mus musculus OX=10090 GN=Bmi1 PE=1 SV=1;tr|Q3ULL2|Q3ULL2_MOUSE Uncharacterized p	A2ASR7	Bmi1	Polycomb complex protein BMI-1 (Fragment)	7	4	2	34	18.452	23879000	29487000	21717000	29824000	39901000	36897000	1.42006	0.0497298
tr|Q7JCY9|Q7JCY9_MOUSE;tr|Q3V2U3|Q3V2U3_MOUSE;tr|Q3V257|Q3V257_MOUSE;tr|Q3TKD9|Q3TKD9_MOUSE;sp|P00848|ATP6_MOUSE;tr|A0A141CM46|A0A141CM46_MOUSE;tr|A0A141CM20|A0A141CM20_MOUSE;tr|A0A075DCB0|A0A075DCB0_MOUSE	tr|Q7JCY9|Q7JCY9_MOUSE;tr|Q3V2U3|Q3V2U3_MOUSE;tr|Q3V257|Q3V257_MOUSE;tr|Q3TKD9|Q3TKD9_MOUSE;sp|P00848|ATP6_MOUSE;tr|A0A141CM46|A0A141CM46_MOUSE;tr|A0A141CM20|A0A141CM20_MOUSE;tr|A0A075DCB0|A0A075DCB0_MOUSE	tr|Q7JCY9|Q7JCY9_MOUSE ATP synthase subunit a OS=Mus musculus OX=10090 GN=mt-Atp6 PE=1 SV=1;tr|Q3V2U3|Q3V2U3_MOUSE ATP synthase subunit a OS=Mus musculus OX=10090 GN=mt-Atp6 PE=2 SV=1;tr|Q3V257|Q3V257_MOUSE ATP synthase subunit a (Fragment) OS=Mus musculus	Q7JCY9	mt-Atp6 ATP6 Atp6 ATPase 6 ATPase6	ATP synthase subunit a	8	2	2	8.4	25.095	30102000	27373000	19285000	16785000	12383000	17431000	0.607074	0.0497385
tr|Q501L4|Q501L4_MOUSE;tr|Q3UAY3|Q3UAY3_MOUSE;sp|Q8BMQ2|TF3C4_MOUSE;tr|Q3UJL1|Q3UJL1_MOUSE;tr|E9Q2B0|E9Q2B0_MOUSE	tr|Q501L4|Q501L4_MOUSE;tr|Q3UAY3|Q3UAY3_MOUSE;sp|Q8BMQ2|TF3C4_MOUSE;tr|Q3UJL1|Q3UJL1_MOUSE;tr|E9Q2B0|E9Q2B0_MOUSE	tr|Q501L4|Q501L4_MOUSE General transcription factor IIIC, polypeptide 4 OS=Mus musculus OX=10090 GN=Gtf3c4 PE=2 SV=1;tr|Q3UAY3|Q3UAY3_MOUSE Uncharacterized protein OS=Mus musculus OX=10090 GN=Gtf3c4 PE=2 SV=1;sp|Q8BMQ2|TF3C4_MOUSE General transcription fac	Q501L4	Gtf3c4	General transcription factor IIIC, polypeptide 4	5	4	4	8.3	91.631	31210000	31868000	32683000	30979000	29210000	28536000	0.926525	0.0498602
tr|Q3TFE8|Q3TFE8_MOUSE;tr|Q7TSZ6|Q7TSZ6_MOUSE;sp|P70168|IMB1_MOUSE;tr|Q3UHW8|Q3UHW8_MOUSE	tr|Q3TFE8|Q3TFE8_MOUSE;tr|Q7TSZ6|Q7TSZ6_MOUSE;sp|P70168|IMB1_MOUSE;tr|Q3UHW8|Q3UHW8_MOUSE	tr|Q3TFE8|Q3TFE8_MOUSE Uncharacterized protein OS=Mus musculus OX=10090 GN=Kpnb1 PE=2 SV=1;tr|Q7TSZ6|Q7TSZ6_MOUSE Karyopherin (Importin) beta 1 OS=Mus musculus OX=10090 GN=Kpnb1 PE=2 SV=1;sp|P70168|IMB1_MOUSE Importin subunit beta-1 OS=Mus musculus OX=1009	Q3TFE8	Kpnb1	Importin N-terminal domain-containing protein	4	38	38	60.1	97.112	3663900000	3605300000	3846700000	3896200000	3892100000	3958100000	1.05672	0.0501304
tr|Q1A602|Q1A602_MOUSE	tr|Q1A602|Q1A602_MOUSE	tr|Q1A602|Q1A602_MOUSE Non-muscle alpha-actinin 4 OS=Mus musculus OX=10090 GN=Actn4 PE=2 SV=1	Q1A602	Actn4	Non-muscle alpha-actinin 4	1	58	1	64.1	104.91	698610000	645940000	695390000	523790000	593470000	629100000	0.856084	0.050264
tr|A2ATI9|A2ATI9_MOUSE;sp|Q99JX3|GORS2_MOUSE;tr|Q3TG07|Q3TG07_MOUSE;tr|Q3TX06|Q3TX06_MOUSE;tr|Q3TIK1|Q3TIK1_MOUSE;tr|A2ATI8|A2ATI8_MOUSE;tr|A2ATI6|A2ATI6_MOUSE;tr|Q3V458|Q3V458_MOUSE;tr|Q922I9|Q922I9_MOUSE	tr|A2ATI9|A2ATI9_MOUSE;sp|Q99JX3|GORS2_MOUSE;tr|Q3TG07|Q3TG07_MOUSE;tr|Q3TX06|Q3TX06_MOUSE;tr|Q3TIK1|Q3TIK1_MOUSE;tr|A2ATI8|A2ATI8_MOUSE;tr|A2ATI6|A2ATI6_MOUSE	tr|A2ATI9|A2ATI9_MOUSE Golgi reassembly stacking protein 2, isoform CRA_d OS=Mus musculus OX=10090 GN=Gorasp2 PE=1 SV=1;sp|Q99JX3|GORS2_MOUSE Golgi reassembly-stacking protein 2 OS=Mus musculus OX=10090 GN=Gorasp2 PE=1 SV=3;tr|Q3TG07|Q3TG07_MOUSE Uncharact	A2ATI9	Gorasp2 mCG_12970	Golgi reassembly stacking protein 2, isoform CRA_d (Golgi reassembly-stacking protein 2)	9	12	11	30.2	45.026	415700000	394010000	387790000	423490000	455570000	427630000	1.09118	0.0504997
sp|Q6P5E4|UGGG1_MOUSE;tr|Q8BWM7|Q8BWM7_MOUSE;tr|G3UZU8|G3UZU8_MOUSE;tr|G3UYG7|G3UYG7_MOUSE;tr|B0LAE5|B0LAE5_MOUSE;tr|G3UY73|G3UY73_MOUSE;tr|G3UY35|G3UY35_MOUSE;tr|E9Q4X2|E9Q4X2_MOUSE;tr|G3UXP5|G3UXP5_MOUSE	sp|Q6P5E4|UGGG1_MOUSE	sp|Q6P5E4|UGGG1_MOUSE UDP-glucose:glycoprotein glucosyltransferase 1 OS=Mus musculus OX=10090 GN=Uggt1 PE=1 SV=4	Q6P5E4	Uggt1 Gt Ugcgl1 Uggt Ugt1 Ugtr	UDP-glucose:glycoprotein glucosyltransferase 1 (UGT1) (EC 2.4.1.-) (UDP--Glc:glycoprotein glucosyltransferase) (UDP-glucose ceramide glucosyltransferase-like 1)	9	70	70	55.8	176.43	2341000000	2253100000	2181800000	2129700000	2148400000	2084800000	0.939049	0.0505001
tr|Q3THE6|Q3THE6_MOUSE	tr|Q3THE6|Q3THE6_MOUSE	tr|Q3THE6|Q3THE6_MOUSE Ferritin OS=Mus musculus OX=10090 PE=2 SV=1	Q3THE6		Ferritin	1	6	1	53	20.695	139380000	117360000	117970000	162030000	142720000	147070000	1.20579	0.0507635
sp|P97792|CXAR_MOUSE;tr|Q3TV22|Q3TV22_MOUSE;tr|A0A338P6N1|A0A338P6N1_MOUSE	sp|P97792|CXAR_MOUSE;tr|Q3TV22|Q3TV22_MOUSE	sp|P97792|CXAR_MOUSE Coxsackievirus and adenovirus receptor homolog OS=Mus musculus OX=10090 GN=Cxadr PE=1 SV=1;tr|Q3TV22|Q3TV22_MOUSE Uncharacterized protein OS=Mus musculus OX=10090 GN=Cxadr PE=2 SV=1	P97792	Cxadr Car	Coxsackievirus and adenovirus receptor homolog (CAR) (mCAR)	3	12	12	43.6	39.947	299560000	297950000	276340000	276730000	258620000	259940000	0.910099	0.0508496
tr|Q0PD65|Q0PD65_MOUSE;sp|P53994|RAB2A_MOUSE;tr|Q8BXY4|Q8BXY4_MOUSE;tr|Q6PDZ3|Q6PDZ3_MOUSE;tr|Q3TEG7|Q3TEG7_MOUSE;tr|G3UXQ7|G3UXQ7_MOUSE;tr|G3V022|G3V022_MOUSE	tr|Q0PD65|Q0PD65_MOUSE;sp|P53994|RAB2A_MOUSE;tr|Q8BXY4|Q8BXY4_MOUSE;tr|Q6PDZ3|Q6PDZ3_MOUSE;tr|Q3TEG7|Q3TEG7_MOUSE	tr|Q0PD65|Q0PD65_MOUSE RAB2, member RAS oncogene family OS=Mus musculus OX=10090 GN=Rab2a PE=1 SV=1;sp|P53994|RAB2A_MOUSE Ras-related protein Rab-2A OS=Mus musculus OX=10090 GN=Rab2a PE=1 SV=1;tr|Q8BXY4|Q8BXY4_MOUSE Uncharacterized protein OS=Mus musculus	Q0PD65	Rab2a Rab2 Rab2A mCG_123621	RAB2, member RAS oncogene family (Rab2A)	7	14	7	70.8	23.547	1029000000	934910000	1037500000	896050000	929190000	871300000	0.898424	0.0511715
sp|Q8BG51|MIRO1_MOUSE;tr|F7ASU3|F7ASU3_MOUSE;tr|Q7TPW0|Q7TPW0_MOUSE	sp|Q8BG51|MIRO1_MOUSE	sp|Q8BG51|MIRO1_MOUSE Mitochondrial Rho GTPase 1 OS=Mus musculus OX=10090 GN=Rhot1 PE=1 SV=1	Q8BG51	Rhot1 Arht1	Mitochondrial Rho GTPase 1 (MIRO-1) (EC 3.6.5.-) (Ras homolog gene family member T1)	3	17	16	43.7	72.241	156120000	152360000	177800000	144790000	132690000	137090000	0.852534	0.0511855
sp|O35226|PSMD4_MOUSE;tr|Q9CY29|Q9CY29_MOUSE	sp|O35226|PSMD4_MOUSE;tr|Q9CY29|Q9CY29_MOUSE	sp|O35226|PSMD4_MOUSE 26S proteasome non-ATPase regulatory subunit 4 OS=Mus musculus OX=10090 GN=Psmd4 PE=1 SV=1;tr|Q9CY29|Q9CY29_MOUSE Uncharacterized protein OS=Mus musculus OX=10090 GN=Psmd4 PE=2 SV=1	O35226	Psmd4 Mcb1	26S proteasome non-ATPase regulatory subunit 4 (26S proteasome regulatory subunit RPN10) (26S proteasome regulatory subunit S5A) (Multiubiquitin chain-binding protein)	2	9	1	30.9	40.703	106380000	110610000	137190000	137470000	157850000	153400000	1.26693	0.0513388
tr|D3YXU2|D3YXU2_MOUSE;tr|D3YY76|D3YY76_MOUSE;sp|Q9D3P8|PLRKT_MOUSE;tr|D3YV19|D3YV19_MOUSE	tr|D3YXU2|D3YXU2_MOUSE;tr|D3YY76|D3YY76_MOUSE;sp|Q9D3P8|PLRKT_MOUSE;tr|D3YV19|D3YV19_MOUSE	tr|D3YXU2|D3YXU2_MOUSE Plasminogen receptor (KT) (Fragment) OS=Mus musculus OX=10090 GN=Plgrkt PE=1 SV=1;tr|D3YY76|D3YY76_MOUSE Plasminogen receptor (KT) (Fragment) OS=Mus musculus OX=10090 GN=Plgrkt PE=1 SV=1;sp|Q9D3P8|PLRKT_MOUSE Plasminogen receptor (KT	D3YXU2	Plgrkt 5033414D02Rik	Plasminogen receptor (KT) (Fragment)	4	2	2	47.6	5.201	33266000	40110000	30310000	23543000	21571000	NaN	0.652653	0.0514986
tr|Q8CD23|Q8CD23_MOUSE;tr|Q3TL52|Q3TL52_MOUSE;sp|P09405|NUCL_MOUSE;tr|Q3TT41|Q3TT41_MOUSE;tr|Q3TGR3|Q3TGR3_MOUSE;tr|Q8CE30|Q8CE30_MOUSE;tr|Q9CT46|Q9CT46_MOUSE;tr|A0A087WRM5|A0A087WRM5_MOUSE	tr|Q8CD23|Q8CD23_MOUSE;tr|Q3TL52|Q3TL52_MOUSE;sp|P09405|NUCL_MOUSE;tr|Q3TT41|Q3TT41_MOUSE;tr|Q3TGR3|Q3TGR3_MOUSE;tr|Q8CE30|Q8CE30_MOUSE	tr|Q8CD23|Q8CD23_MOUSE Uncharacterized protein OS=Mus musculus OX=10090 GN=Ncl PE=2 SV=1;tr|Q3TL52|Q3TL52_MOUSE Uncharacterized protein OS=Mus musculus OX=10090 GN=Ncl PE=2 SV=1;sp|P09405|NUCL_MOUSE Nucleolin OS=Mus musculus OX=10090 GN=Ncl PE=1 SV=2;tr|Q3	Q8CD23	Ncl	Uncharacterized protein	8	47	47	51.3	76.864	20381000000	19619000000	20348000000	22270000000	21309000000	20825000000	1.06721	0.0515123
tr|E9Q6R7|E9Q6R7_MOUSE;tr|O08614|O08614_MOUSE;tr|A0A1W2P7C0|A0A1W2P7C0_MOUSE;tr|Q61636|Q61636_MOUSE;tr|Q3TR59|Q3TR59_MOUSE;tr|Q3UYS4|Q3UYS4_MOUSE;tr|A0A1W2P8G5|A0A1W2P8G5_MOUSE;tr|Q6P6L2|Q6P6L2_MOUSE;tr|A0A1W2P8A5|A0A1W2P8A5_MOUSE;tr|Q810I5|Q810I5_MOUSE;tr|Q9D1Z0|Q9D1Z0_MOUSE;tr|Q8C7R5|Q8C7R5_MOUSE;tr|A0A1W2P6L4|A0A1W2P6L4_MOUSE	tr|E9Q6R7|E9Q6R7_MOUSE;tr|O08614|O08614_MOUSE	tr|E9Q6R7|E9Q6R7_MOUSE Utrophin OS=Mus musculus OX=10090 GN=Utrn PE=1 SV=1;tr|O08614|O08614_MOUSE Cytoskeletal protein OS=Mus musculus OX=10090 GN=Utrn PE=2 SV=1	E9Q6R7	Utrn	Utrophin	13	53	53	22.4	392.7	380880000	407190000	379560000	349770000	352940000	371780000	0.920232	0.0517726
tr|Q4VBC9|Q4VBC9_MOUSE;sp|O09111|NDUBB_MOUSE	tr|Q4VBC9|Q4VBC9_MOUSE;sp|O09111|NDUBB_MOUSE	tr|Q4VBC9|Q4VBC9_MOUSE Ndufb11 protein (Fragment) OS=Mus musculus OX=10090 GN=Ndufb11 PE=2 SV=1;sp|O09111|NDUBB_MOUSE NADH dehydrogenase [ubiquinone] 1 beta subcomplex subunit 11, mitochondrial OS=Mus musculus OX=10090 GN=Ndufb11 PE=1 SV=2	Q4VBC9	Ndufb11	Ndufb11 protein (Fragment)	2	3	3	25.8	17.485	40086000	37627000	36865000	41742000	41994000	40144000	1.08118	0.0518776
sp|Q6P4S8|INT1_MOUSE;tr|K3W4P2|K3W4P2_MOUSE;tr|A0A0G2JH17|A0A0G2JH17_MOUSE;tr|Q0KK53|Q0KK53_MOUSE;tr|Q3U1N8|Q3U1N8_MOUSE;tr|A0A0G2JFR3|A0A0G2JFR3_MOUSE;tr|A0A0G2JDG8|A0A0G2JDG8_MOUSE	sp|Q6P4S8|INT1_MOUSE;tr|K3W4P2|K3W4P2_MOUSE;tr|A0A0G2JH17|A0A0G2JH17_MOUSE	sp|Q6P4S8|INT1_MOUSE Integrator complex subunit 1 OS=Mus musculus OX=10090 GN=Ints1 PE=1 SV=2;tr|K3W4P2|K3W4P2_MOUSE Integrator complex subunit 1 OS=Mus musculus OX=10090 GN=Ints1 PE=1 SV=2;tr|A0A0G2JH17|A0A0G2JH17_MOUSE Integrator complex subunit 1 OS=Mus	Q6P4S8	Ints1	Integrator complex subunit 1 (Int1)	7	18	18	10.9	245.16	51448000	57224000	60811000	69870000	62087000	66623000	1.17168	0.0519208
sp|P56391|CX6B1_MOUSE;tr|A0A140LIU3|A0A140LIU3_MOUSE	sp|P56391|CX6B1_MOUSE;tr|A0A140LIU3|A0A140LIU3_MOUSE	sp|P56391|CX6B1_MOUSE Cytochrome c oxidase subunit 6B1 OS=Mus musculus OX=10090 GN=Cox6b1 PE=1 SV=2;tr|A0A140LIU3|A0A140LIU3_MOUSE Cytochrome c oxidase subunit 6B1 OS=Mus musculus OX=10090 GN=Cox6b1 PE=1 SV=1	P56391	Cox6b1 Cox6b	Cytochrome c oxidase subunit 6B1 (Cytochrome c oxidase subunit VIb isoform 1) (COX VIb-1)	2	7	7	70.9	10.071	678470000	641820000	621300000	586260000	613770000	577450000	0.915476	0.0520243
sp|Q9D880|TIM50_MOUSE	sp|Q9D880|TIM50_MOUSE	sp|Q9D880|TIM50_MOUSE Mitochondrial import inner membrane translocase subunit TIM50 OS=Mus musculus OX=10090 GN=Timm50 PE=1 SV=1	Q9D880	Timm50 Tim50	Mitochondrial import inner membrane translocase subunit TIM50	1	13	13	46.2	39.776	647010000	642980000	621410000	697370000	699680000	653600000	1.07285	0.0521294
tr|Q3TCN5|Q3TCN5_MOUSE;sp|Q91X51|GORS1_MOUSE	tr|Q3TCN5|Q3TCN5_MOUSE;sp|Q91X51|GORS1_MOUSE	tr|Q3TCN5|Q3TCN5_MOUSE Uncharacterized protein OS=Mus musculus OX=10090 GN=Gorasp1 PE=1 SV=1;sp|Q91X51|GORS1_MOUSE Golgi reassembly-stacking protein 1 OS=Mus musculus OX=10090 GN=Gorasp1 PE=1 SV=3	Q3TCN5	Gorasp1	GRASP55_65 domain-containing protein	2	5	4	13.2	46.882	18628000	20000000	22065000	29574000	24440000	23779000	1.28175	0.0523186
tr|Q3UM35|Q3UM35_MOUSE;sp|O35054|CLD4_MOUSE	tr|Q3UM35|Q3UM35_MOUSE;sp|O35054|CLD4_MOUSE	tr|Q3UM35|Q3UM35_MOUSE Claudin OS=Mus musculus OX=10090 GN=Cldn4 PE=2 SV=1;sp|O35054|CLD4_MOUSE Claudin-4 OS=Mus musculus OX=10090 GN=Cldn4 PE=1 SV=1	Q3UM35	Cldn4 mCG_16698	Claudin	2	3	3	17.1	22.338	95292000	89580000	94511000	85926000	80274000	88494000	0.91163	0.0524821
tr|A0A1N9M4K1|A0A1N9M4K1_MOUSE;tr|A0A1L1SU77|A0A1L1SU77_MOUSE;sp|P70665|SIAE_MOUSE;tr|A0A1L1SQF7|A0A1L1SQF7_MOUSE	tr|A0A1N9M4K1|A0A1N9M4K1_MOUSE;tr|A0A1L1SU77|A0A1L1SU77_MOUSE;sp|P70665|SIAE_MOUSE	tr|A0A1N9M4K1|A0A1N9M4K1_MOUSE Sialate O-acetylesterase OS=Mus musculus OX=10090 GN=Siae PE=1 SV=1;tr|A0A1L1SU77|A0A1L1SU77_MOUSE Sialate O-acetylesterase OS=Mus musculus OX=10090 GN=Siae PE=1 SV=1;sp|P70665|SIAE_MOUSE Sialate O-acetylesterase OS=Mus muscu	A0A1N9M4K1	Siae	Sialate O-acetylesterase	4	5	5	12.4	53.172	40426000	50026000	54850000	37874000	36620000	35743000	0.758675	0.0525352
sp|Q80SY5|PR38B_MOUSE;tr|A0A0G2JEW4|A0A0G2JEW4_MOUSE;tr|A0A0G2JGW4|A0A0G2JGW4_MOUSE;tr|Q8CI29|Q8CI29_MOUSE	sp|Q80SY5|PR38B_MOUSE	sp|Q80SY5|PR38B_MOUSE Pre-mRNA-splicing factor 38B OS=Mus musculus OX=10090 GN=Prpf38b PE=1 SV=1	Q80SY5	Prpf38b	Pre-mRNA-splicing factor 38B	4	12	12	30.1	63.752	270910000	252890000	238040000	229470000	214200000	229870000	0.884096	0.0528753
sp|Q66GT5|PTPM1_MOUSE;tr|Q3U926|Q3U926_MOUSE	sp|Q66GT5|PTPM1_MOUSE;tr|Q3U926|Q3U926_MOUSE	sp|Q66GT5|PTPM1_MOUSE Phosphatidylglycerophosphatase and protein-tyrosine phosphatase 1 OS=Mus musculus OX=10090 GN=Ptpmt1 PE=1 SV=1;tr|Q3U926|Q3U926_MOUSE Uncharacterized protein OS=Mus musculus OX=10090 GN=Ptpmt1 PE=2 SV=1	Q66GT5	Ptpmt1 Plip	Phosphatidylglycerophosphatase and protein-tyrosine phosphatase 1 (EC 3.1.3.27) (PTEN-like phosphatase) (Phosphoinositide lipid phosphatase) (Protein-tyrosine phosphatase mitochondrial 1) (EC 3.1.3.16) (EC 3.1.3.48)	2	8	8	53.4	21.942	64268000	58436000	50495000	42784000	39502000	49864000	0.762995	0.0529096
sp|Q8BJ05|ZC3HE_MOUSE;tr|A0A1Y7VK20|A0A1Y7VK20_MOUSE;tr|A0A1Y7VK72|A0A1Y7VK72_MOUSE;tr|A0A1Y7VJD9|A0A1Y7VJD9_MOUSE;tr|A0A1Y7VP61|A0A1Y7VP61_MOUSE	sp|Q8BJ05|ZC3HE_MOUSE	sp|Q8BJ05|ZC3HE_MOUSE Zinc finger CCCH domain-containing protein 14 OS=Mus musculus OX=10090 GN=Zc3h14 PE=1 SV=1	Q8BJ05	Zc3h14	Zinc finger CCCH domain-containing protein 14	5	23	23	41.8	82.408	375910000	361190000	368720000	411400000	409610000	378510000	1.08473	0.0531072
tr|Q545Q2|Q545Q2_MOUSE;sp|Q64310|SURF4_MOUSE;tr|Q3U7E6|Q3U7E6_MOUSE;tr|E0CXD9|E0CXD9_MOUSE;tr|F7CH13|F7CH13_MOUSE	tr|Q545Q2|Q545Q2_MOUSE;sp|Q64310|SURF4_MOUSE;tr|Q3U7E6|Q3U7E6_MOUSE;tr|E0CXD9|E0CXD9_MOUSE	tr|Q545Q2|Q545Q2_MOUSE Surfeit gene 4, isoform CRA_a OS=Mus musculus OX=10090 GN=Surf4 PE=1 SV=1;sp|Q64310|SURF4_MOUSE Surfeit locus protein 4 OS=Mus musculus OX=10090 GN=Surf4 PE=1 SV=1;tr|Q3U7E6|Q3U7E6_MOUSE Uncharacterized protein OS=Mus musculus OX=100	Q545Q2	Surf4 mCG_11365	Surfeit gene 4, isoform CRA_a	5	5	5	24.5	30.381	424020000	480710000	415950000	365200000	375080000	397240000	0.861314	0.0531436
tr|Q9D0K3|Q9D0K3_MOUSE;tr|Q4KL82|Q4KL82_MOUSE;sp|Q9WUK4|RFC2_MOUSE;tr|Q99K91|Q99K91_MOUSE	tr|Q9D0K3|Q9D0K3_MOUSE;tr|Q4KL82|Q4KL82_MOUSE;sp|Q9WUK4|RFC2_MOUSE;tr|Q99K91|Q99K91_MOUSE	tr|Q9D0K3|Q9D0K3_MOUSE Uncharacterized protein OS=Mus musculus OX=10090 GN=Rfc2 PE=2 SV=1;tr|Q4KL82|Q4KL82_MOUSE Replication factor C (Activator 1) 2 OS=Mus musculus OX=10090 GN=Rfc2 PE=1 SV=1;sp|Q9WUK4|RFC2_MOUSE Replication factor C subunit 2 OS=Mus musc	Q9D0K3	Rfc2	AAA domain-containing protein	4	12	12	45.6	38.824	170010000	155530000	168780000	190540000	177490000	177800000	1.1042	0.0532145
sp|Q8K0Z7|TACO1_MOUSE	sp|Q8K0Z7|TACO1_MOUSE	sp|Q8K0Z7|TACO1_MOUSE Translational activator of cytochrome c oxidase 1 OS=Mus musculus OX=10090 GN=Taco1 PE=1 SV=1	Q8K0Z7	Taco1 Ccdc44	Translational activator of cytochrome c oxidase 1 (Coiled-coil domain-containing protein 44) (Translational activator of mitochondrially-encoded cytochrome c oxidase 1)	1	8	8	47.3	32.314	106370000	99733000	125360000	161240000	142630000	127930000	1.30271	0.053311
sp|O88665|BRD7_MOUSE	sp|O88665|BRD7_MOUSE	sp|O88665|BRD7_MOUSE Bromodomain-containing protein 7 OS=Mus musculus OX=10090 GN=Brd7 PE=1 SV=1	O88665	Brd7 Bp75	Bromodomain-containing protein 7 (75 kDa bromodomain protein)	1	4	3	8.4	73.999	20926000	28160000	25002000	18712000	19858000	15688000	0.732345	0.0533112
tr|Q542B0|Q542B0_MOUSE;sp|Q921I9|EXOS4_MOUSE;tr|A0A2R8VHM9|A0A2R8VHM9_MOUSE	tr|Q542B0|Q542B0_MOUSE;sp|Q921I9|EXOS4_MOUSE	tr|Q542B0|Q542B0_MOUSE Uncharacterized protein OS=Mus musculus OX=10090 GN=Exosc4 PE=1 SV=1;sp|Q921I9|EXOS4_MOUSE Exosome complex component RRP41 OS=Mus musculus OX=10090 GN=Exosc4 PE=1 SV=3	Q542B0	Exosc4	Uncharacterized protein	3	9	9	50.6	26.249	109490000	100320000	118490000	122750000	129240000	122560000	1.14088	0.0534717
tr|A0A0R4J1V1|A0A0R4J1V1_MOUSE;sp|Q75N73|S39AE_MOUSE;tr|D3Z6P5|D3Z6P5_MOUSE;tr|D3Z354|D3Z354_MOUSE;tr|D3YXD7|D3YXD7_MOUSE	tr|A0A0R4J1V1|A0A0R4J1V1_MOUSE;sp|Q75N73|S39AE_MOUSE;tr|D3Z6P5|D3Z6P5_MOUSE	tr|A0A0R4J1V1|A0A0R4J1V1_MOUSE Solute carrier family 39 (Zinc transporter), member 14, isoform CRA_a OS=Mus musculus OX=10090 GN=Slc39a14 PE=1 SV=1;sp|Q75N73|S39AE_MOUSE Zinc transporter ZIP14 OS=Mus musculus OX=10090 GN=Slc39a14 PE=1 SV=1;tr|D3Z6P5|D3Z6P5	A0A0R4J1V1	Slc39a14 mCG_141013	Solute carrier family 39 (Zinc transporter), member 14, isoform CRA_a (Zinc transporter ZIP14)	5	4	4	14.1	53.754	60704000	57613000	52792000	46033000	52811000	45988000	0.846431	0.0534798
tr|E9PZ00|E9PZ00_MOUSE;tr|Q8BFQ1|Q8BFQ1_MOUSE;tr|Q3U8C4|Q3U8C4_MOUSE;tr|Q3U897|Q3U897_MOUSE;tr|Q3U825|Q3U825_MOUSE;tr|Q3TWL8|Q3TWL8_MOUSE;tr|Q3TKB2|Q3TKB2_MOUSE;tr|Q3TWM9|Q3TWM9_MOUSE;tr|Q3UAS4|Q3UAS4_MOUSE;tr|Q3UE29|Q3UE29_MOUSE;tr|Q3TXJ0|Q3TXJ0_MOUSE;tr|Q3U5W2|Q3U5W2_MOUSE;tr|Q3TXP9|Q3TXP9_MOUSE;tr|Q3TWF9|Q3TWF9_MOUSE;tr|Q3TKK3|Q3TKK3_MOUSE;tr|Q3TIT5|Q3TIT5_MOUSE;tr|Q3TID4|Q3TID4_MOUSE;tr|Q3TWE…	tr|E9PZ00|E9PZ00_MOUSE;tr|Q8BFQ1|Q8BFQ1_MOUSE;tr|Q3U8C4|Q3U8C4_MOUSE;tr|Q3U897|Q3U897_MOUSE;tr|Q3U825|Q3U825_MOUSE;tr|Q3TWL8|Q3TWL8_MOUSE;tr|Q3TKB2|Q3TKB2_MOUSE;tr|Q3TWM9|Q3TWM9_MOUSE;tr|Q3UAS4|Q3UAS4_MOUSE;tr|Q3UE29|Q3UE29_MOUSE;tr|Q3TXJ0|Q3TXJ0_MOUSE;tr|Q3U5W2|Q3U5W2_MOUSE;tr|Q3TXP9|Q3TXP9_MOUSE;tr|Q3TWF9|Q3TWF9_MOUSE;tr|Q3TKK3|Q3TKK3_MOUSE;tr|Q3TIT5|Q3TIT5_MOUSE;tr|Q3TID4|Q3TID4_MOUSE;tr|Q3TWE…	tr|E9PZ00|E9PZ00_MOUSE Prosaposin OS=Mus musculus OX=10090 GN=Psap PE=1 SV=1;tr|Q8BFQ1|Q8BFQ1_MOUSE Prosaposin OS=Mus musculus OX=10090 GN=Psap PE=1 SV=1;tr|Q3U8C4|Q3U8C4_MOUSE Uncharacterized protein OS=Mus musculus OX=10090 GN=Psap PE=2 SV=1;tr|Q3U897|Q3	E9PZ00	Psap	Prosaposin	23	17	17	43.2	60.672	570980000	575730000	636530000	523420000	531760000	547290000	0.898628	0.0535159
tr|A0A087WQH8|A0A087WQH8_MOUSE	tr|A0A087WQH8|A0A087WQH8_MOUSE	tr|A0A087WQH8|A0A087WQH8_MOUSE Probable UDP-sugar transporter protein SLC35A4 OS=Mus musculus OX=10090 GN=Slc35a4 PE=1 SV=1	A0A087WQH8	Slc35a4	Probable UDP-sugar transporter protein SLC35A4	1	3	3	39.8	11.157	86075000	81294000	72630000	70215000	69852000	63910000	0.849908	0.0536467
tr|Q3U4U6|Q3U4U6_MOUSE;sp|P80318|TCPG_MOUSE;tr|E9Q133|E9Q133_MOUSE;tr|Q3U0I3|Q3U0I3_MOUSE;tr|Q3UJP4|Q3UJP4_MOUSE;tr|Q3TBM6|Q3TBM6_MOUSE;tr|F6Q609|F6Q609_MOUSE;tr|F6ZVG8|F6ZVG8_MOUSE;tr|Q9R1U1|Q9R1U1_MOUSE	tr|Q3U4U6|Q3U4U6_MOUSE;sp|P80318|TCPG_MOUSE;tr|E9Q133|E9Q133_MOUSE;tr|Q3U0I3|Q3U0I3_MOUSE;tr|Q3UJP4|Q3UJP4_MOUSE	tr|Q3U4U6|Q3U4U6_MOUSE T-complex protein 1 subunit gamma OS=Mus musculus OX=10090 GN=Cct3 PE=1 SV=1;sp|P80318|TCPG_MOUSE T-complex protein 1 subunit gamma OS=Mus musculus OX=10090 GN=Cct3 PE=1 SV=1;tr|E9Q133|E9Q133_MOUSE T-complex protein 1 subunit gamma O	Q3U4U6	Cct3 mCG_8828	T-complex protein 1 subunit gamma	9	31	31	63.9	60.629	1281000000	1345100000	1550000000	1577400000	1641800000	1637100000	1.16288	0.0536499
sp|Q9CQX8|RT36_MOUSE	sp|Q9CQX8|RT36_MOUSE	sp|Q9CQX8|RT36_MOUSE 28S ribosomal protein S36, mitochondrial OS=Mus musculus OX=10090 GN=Mrps36 PE=1 SV=1	Q9CQX8	Mrps36	28S ribosomal protein S36, mitochondrial (MRP-S36) (S36mt)	1	5	1	70.6	11.101	257900000	226510000	201040000	275180000	272150000	271930000	1.19521	0.0537043
tr|Q545K4|Q545K4_MOUSE;tr|Q3UA13|Q3UA13_MOUSE;tr|Q3U818|Q3U818_MOUSE;sp|O55135|IF6_MOUSE;tr|Q9R071|Q9R071_MOUSE;tr|Q3UBJ6|Q3UBJ6_MOUSE;tr|Q3U740|Q3U740_MOUSE;tr|A6PWZ2|A6PWZ2_MOUSE;tr|D6RG53|D6RG53_MOUSE;tr|D6RJJ3|D6RJJ3_MOUSE;tr|B1AZQ4|B1AZQ4_MOUSE	tr|Q545K4|Q545K4_MOUSE;tr|Q3UA13|Q3UA13_MOUSE;tr|Q3U818|Q3U818_MOUSE;sp|O55135|IF6_MOUSE;tr|Q9R071|Q9R071_MOUSE;tr|Q3UBJ6|Q3UBJ6_MOUSE;tr|Q3U740|Q3U740_MOUSE	tr|Q545K4|Q545K4_MOUSE Eukaryotic translation initiation factor 6 OS=Mus musculus OX=10090 GN=Eif6 PE=1 SV=1;tr|Q3UA13|Q3UA13_MOUSE Eukaryotic translation initiation factor 6 OS=Mus musculus OX=10090 GN=Eif6 PE=2 SV=1;tr|Q3U818|Q3U818_MOUSE Eukaryotic tran	Q545K4	Eif6 EIF6 ITGB4BP Itgb4bp mCG_21067	Eukaryotic translation initiation factor 6 (eIF-6)	11	9	9	56.7	26.511	553810000	515270000	551560000	478260000	512570000	499910000	0.919846	0.0538358
tr|Q564E5|Q564E5_MOUSE;tr|Q3V244|Q3V244_MOUSE;sp|Q9WUK2|IF4H_MOUSE;tr|Q3TG58|Q3TG58_MOUSE;tr|Q80U88|Q80U88_MOUSE	tr|Q564E5|Q564E5_MOUSE;tr|Q3V244|Q3V244_MOUSE;sp|Q9WUK2|IF4H_MOUSE;tr|Q3TG58|Q3TG58_MOUSE;tr|Q80U88|Q80U88_MOUSE	tr|Q564E5|Q564E5_MOUSE Williams-Beuren syndrome chromosome region 1 homolog (Human), isoform CRA_a OS=Mus musculus OX=10090 GN=Eif4h PE=2 SV=1;tr|Q3V244|Q3V244_MOUSE Uncharacterized protein OS=Mus musculus OX=10090 GN=Eif4h PE=2 SV=1;sp|Q9WUK2|IF4H_MOUSE E	Q564E5	Eif4h Wbscr1 mCG_16718	Williams-Beuren syndrome chromosome region 1 homolog (Human), isoform CRA_a	5	8	8	46	27.341	215740000	208180000	253010000	273450000	255060000	295590000	1.21741	0.0539018
tr|B2MWM9|B2MWM9_MOUSE;sp|P14211|CALR_MOUSE;tr|Q3UWP8|Q3UWP8_MOUSE	tr|B2MWM9|B2MWM9_MOUSE;sp|P14211|CALR_MOUSE;tr|Q3UWP8|Q3UWP8_MOUSE	tr|B2MWM9|B2MWM9_MOUSE Calreticulin OS=Mus musculus OX=10090 GN=Calr PE=1 SV=1;sp|P14211|CALR_MOUSE Calreticulin OS=Mus musculus OX=10090 GN=Calr PE=1 SV=1;tr|Q3UWP8|Q3UWP8_MOUSE Uncharacterized protein (Fragment) OS=Mus musculus OX=10090 GN=Calr PE=2 SV=1	B2MWM9	Calr mCG_5893	Calreticulin (MCG5893)	3	24	24	64.4	47.994	6881800000	6914700000	6539900000	7195100000	7087800000	7073400000	1.05015	0.0539905
sp|Q8K2Q9|SHOT1_MOUSE	sp|Q8K2Q9|SHOT1_MOUSE	sp|Q8K2Q9|SHOT1_MOUSE Shootin-1 OS=Mus musculus OX=10090 GN=Shtn1 PE=1 SV=1	Q8K2Q9	Shtn1 Kiaa1598	Shootin-1 (Shootin1)	1	3	3	6.5	71.342	20612000	23833000	24123000	NaN	17921000	18676000	0.800599	0.0541197
tr|A0PJE6|A0PJE6_MOUSE;tr|Q8CFZ3|Q8CFZ3_MOUSE;tr|Q7TMF4|Q7TMF4_MOUSE;tr|E9Q1J7|E9Q1J7_MOUSE;sp|Q99MN9|PCCB_MOUSE;tr|Q3UYS0|Q3UYS0_MOUSE;tr|D3YZC1|D3YZC1_MOUSE;tr|Q9CT71|Q9CT71_MOUSE;tr|A0A087WQV1|A0A087WQV1_MOUSE	tr|A0PJE6|A0PJE6_MOUSE;tr|Q8CFZ3|Q8CFZ3_MOUSE;tr|Q7TMF4|Q7TMF4_MOUSE;tr|E9Q1J7|E9Q1J7_MOUSE;sp|Q99MN9|PCCB_MOUSE;tr|Q3UYS0|Q3UYS0_MOUSE	tr|A0PJE6|A0PJE6_MOUSE Pccb protein (Fragment) OS=Mus musculus OX=10090 GN=Pccb PE=2 SV=1;tr|Q8CFZ3|Q8CFZ3_MOUSE Propionyl Coenzyme A carboxylase, beta polypeptide OS=Mus musculus OX=10090 GN=Pccb PE=2 SV=1;tr|Q7TMF4|Q7TMF4_MOUSE Propionyl Coenzyme A carbo	A0PJE6	Pccb	Pccb protein (Fragment)	9	12	12	34.7	58.174	78506000	72551000	78667000	65754000	63791000	72768000	0.880679	0.054239
tr|D3YWX2|D3YWX2_MOUSE;tr|F6YTL8|F6YTL8_MOUSE;sp|Q9R0I7|YLPM1_MOUSE;tr|E9Q803|E9Q803_MOUSE;tr|Q8C8U8|Q8C8U8_MOUSE;tr|Q3UTT5|Q3UTT5_MOUSE;tr|Q3TMN3|Q3TMN3_MOUSE	tr|D3YWX2|D3YWX2_MOUSE;tr|F6YTL8|F6YTL8_MOUSE;sp|Q9R0I7|YLPM1_MOUSE;tr|E9Q803|E9Q803_MOUSE	tr|D3YWX2|D3YWX2_MOUSE YLP motif-containing protein 1 OS=Mus musculus OX=10090 GN=Ylpm1 PE=1 SV=2;tr|F6YTL8|F6YTL8_MOUSE YLP motif-containing protein 1 (Fragment) OS=Mus musculus OX=10090 GN=Ylpm1 PE=1 SV=1;sp|Q9R0I7|YLPM1_MOUSE YLP motif-containing protei	D3YWX2	Ylpm1	YLP motif-containing protein 1	7	26	26	18.1	241.05	268620000	260550000	260190000	250740000	223040000	244360000	0.909775	0.0544903
sp|Q91YK2|RRP1B_MOUSE;tr|Q6ZQH4|Q6ZQH4_MOUSE;tr|D6RDD0|D6RDD0_MOUSE	sp|Q91YK2|RRP1B_MOUSE;tr|Q6ZQH4|Q6ZQH4_MOUSE	sp|Q91YK2|RRP1B_MOUSE Ribosomal RNA processing protein 1 homolog B OS=Mus musculus OX=10090 GN=Rrp1b PE=1 SV=2;tr|Q6ZQH4|Q6ZQH4_MOUSE MKIAA0179 protein (Fragment) OS=Mus musculus OX=10090 GN=Rrp1b PE=2 SV=1	Q91YK2	Rrp1b	Ribosomal RNA processing protein 1 homolog B (RRP1-like protein B)	3	26	26	49	80.581	691120000	659640000	636390000	702670000	701730000	716050000	1.06708	0.0546692
sp|Q9DCW4|ETFB_MOUSE;tr|A0A0U1RNP5|A0A0U1RNP5_MOUSE;tr|A0A0N4SVE0|A0A0N4SVE0_MOUSE;tr|A0A0U1RNR3|A0A0U1RNR3_MOUSE;tr|A0A0N4SWE9|A0A0N4SWE9_MOUSE;tr|A0A0U1RNK9|A0A0U1RNK9_MOUSE;tr|A0A0U1RQB4|A0A0U1RQB4_MOUSE	sp|Q9DCW4|ETFB_MOUSE;tr|A0A0U1RNP5|A0A0U1RNP5_MOUSE;tr|A0A0N4SVE0|A0A0N4SVE0_MOUSE;tr|A0A0U1RNR3|A0A0U1RNR3_MOUSE;tr|A0A0N4SWE9|A0A0N4SWE9_MOUSE	sp|Q9DCW4|ETFB_MOUSE Electron transfer flavoprotein subunit beta OS=Mus musculus OX=10090 GN=Etfb PE=1 SV=3;tr|A0A0U1RNP5|A0A0U1RNP5_MOUSE Electron transfer flavoprotein subunit beta (Fragment) OS=Mus musculus OX=10090 GN=Etfb PE=4 SV=1;tr|A0A0N4SVE0|A0A0N	Q9DCW4	Etfb	Electron transfer flavoprotein subunit beta (Beta-ETF)	7	15	15	71	27.623	1045700000	1018100000	1039100000	934150000	990300000	999940000	0.94247	0.0547701
tr|Q3TLZ6|Q3TLZ6_MOUSE;tr|Q8BW84|Q8BW84_MOUSE;sp|Q99JT1|GATB_MOUSE	tr|Q3TLZ6|Q3TLZ6_MOUSE;tr|Q8BW84|Q8BW84_MOUSE;sp|Q99JT1|GATB_MOUSE	tr|Q3TLZ6|Q3TLZ6_MOUSE Glutamyl-tRNA(Gln) amidotransferase subunit B, mitochondrial OS=Mus musculus OX=10090 GN=Gatb PE=1 SV=1;tr|Q8BW84|Q8BW84_MOUSE Glutamyl-tRNA(Gln) amidotransferase subunit B, mitochondrial OS=Mus musculus OX=10090 GN=Gatb PE=1 SV=1;sp	Q3TLZ6	Gatb GATB PET112 Pet112 PET112L Pet112l	Glutamyl-tRNA(Gln) amidotransferase subunit B, mitochondrial (Glu-AdT subunit B) (EC 6.3.5.-) (Cytochrome oxidase assembly factor PET112 homolog) (PET112-like)	3	5	5	18.2	52.541	13861000	13622000	14617000	NaN	12948000	12186000	0.895511	0.0552515
sp|Q61425|HCDH_MOUSE	sp|Q61425|HCDH_MOUSE	sp|Q61425|HCDH_MOUSE Hydroxyacyl-coenzyme A dehydrogenase, mitochondrial OS=Mus musculus OX=10090 GN=Hadh PE=1 SV=2	Q61425	Hadh Hadhsc Mschad Schad	Hydroxyacyl-coenzyme A dehydrogenase, mitochondrial (HCDH) (EC 1.1.1.35) (Medium and short-chain L-3-hydroxyacyl-coenzyme A dehydrogenase) (Short-chain 3-hydroxyacyl-CoA dehydrogenase)	1	14	14	69.4	34.463	915170000	934310000	877480000	870860000	839030000	793880000	0.918154	0.0559112
tr|A0A0A1HAM8|A0A0A1HAM8_MOUSE;sp|P26645|MARCS_MOUSE;tr|Q05BL6|Q05BL6_MOUSE	tr|A0A0A1HAM8|A0A0A1HAM8_MOUSE;sp|P26645|MARCS_MOUSE	tr|A0A0A1HAM8|A0A0A1HAM8_MOUSE 80K protein OS=Mus musculus OX=10090 GN=Marcks PE=2 SV=1;sp|P26645|MARCS_MOUSE Myristoylated alanine-rich C-kinase substrate OS=Mus musculus OX=10090 GN=Marcks PE=1 SV=2	A0A0A1HAM8	Marcks	80K protein	3	6	6	29.8	29.721	147830000	170730000	166440000	101710000	139290000	134300000	0.773814	0.0560878
sp|Q9JKP8|CHRC1_MOUSE;tr|D3Z0U4|D3Z0U4_MOUSE	sp|Q9JKP8|CHRC1_MOUSE;tr|D3Z0U4|D3Z0U4_MOUSE	sp|Q9JKP8|CHRC1_MOUSE Chromatin accessibility complex protein 1 OS=Mus musculus OX=10090 GN=Chrac1 PE=1 SV=1;tr|D3Z0U4|D3Z0U4_MOUSE Chromatin accessibility complex 1, isoform CRA_a OS=Mus musculus OX=10090 GN=Chrac1 PE=1 SV=1	Q9JKP8	Chrac1	Chromatin accessibility complex protein 1 (CHRAC-1) (DNA polymerase epsilon subunit p15) (NF-YC-like protein) (YC-like protein 1) (YCL1)	2	6	6	58.1	14.127	62376000	57652000	53550000	78997000	63168000	73888000	1.2447	0.0561852
tr|G3X8Q0|G3X8Q0_MOUSE;sp|O89090|SP1_MOUSE;tr|A2TH11|A2TH11_MOUSE	tr|G3X8Q0|G3X8Q0_MOUSE;sp|O89090|SP1_MOUSE	tr|G3X8Q0|G3X8Q0_MOUSE Trans-acting transcription factor 1 OS=Mus musculus OX=10090 GN=Sp1 PE=1 SV=1;sp|O89090|SP1_MOUSE Transcription factor Sp1 OS=Mus musculus OX=10090 GN=Sp1 PE=1 SV=2	G3X8Q0	Sp1 mCG_17604	Trans-acting transcription factor 1 (Transcription factor Sp1)	3	5	5	8.5	80.443	98222000	78304000	63773000	55106000	55846000	42623000	0.6391	0.0563874
tr|Q8CI67|Q8CI67_MOUSE;tr|Q3UL16|Q3UL16_MOUSE;sp|Q9WVD4|CLCN5_MOUSE;tr|B1ATV0|B1ATV0_MOUSE;tr|Q8C6W8|Q8C6W8_MOUSE;tr|Q3LRV6|Q3LRV6_MOUSE;tr|A0A1B0GT29|A0A1B0GT29_MOUSE;tr|Q8CBL5|Q8CBL5_MOUSE;sp|Q61418|CLCN4_MOUSE;tr|Q8BQG0|Q8BQG0_MOUSE;tr|A0A1B0GRR0|A0A1B0GRR0_MOUSE	tr|Q8CI67|Q8CI67_MOUSE;tr|Q3UL16|Q3UL16_MOUSE;sp|Q9WVD4|CLCN5_MOUSE;tr|B1ATV0|B1ATV0_MOUSE	tr|Q8CI67|Q8CI67_MOUSE Chloride channel protein OS=Mus musculus OX=10090 GN=Clcn5 PE=2 SV=1;tr|Q3UL16|Q3UL16_MOUSE Chloride channel protein OS=Mus musculus OX=10090 GN=Clcn5 PE=2 SV=1;sp|Q9WVD4|CLCN5_MOUSE H(+)/Cl(-) exchange transporter 5 OS=Mus musculus	Q8CI67	Clcn5	Chloride channel protein	11	5	3	8.4	83.1	23742000	24339000	21980000	20981000	17868000	21088000	0.855497	0.0567279
sp|Q9D1L9|LTOR5_MOUSE;tr|G3UW70|G3UW70_MOUSE	sp|Q9D1L9|LTOR5_MOUSE;tr|G3UW70|G3UW70_MOUSE	sp|Q9D1L9|LTOR5_MOUSE Ragulator complex protein LAMTOR5 OS=Mus musculus OX=10090 GN=Lamtor5 PE=1 SV=1;tr|G3UW70|G3UW70_MOUSE MCG21719 OS=Mus musculus OX=10090 GN=Lamtor5 PE=1 SV=1	Q9D1L9	Lamtor5 Hbxip Xip	Ragulator complex protein LAMTOR5 (Late endosomal/lysosomal adaptor and MAPK and MTOR activator 5)	2	4	4	70.3	9.6418	41399000	57709000	64042000	31854000	35095000	39604000	0.653098	0.0567617
sp|Q4VA53|PDS5B_MOUSE;tr|F8WHU5|F8WHU5_MOUSE	sp|Q4VA53|PDS5B_MOUSE;tr|F8WHU5|F8WHU5_MOUSE	sp|Q4VA53|PDS5B_MOUSE Sister chromatid cohesion protein PDS5 homolog B OS=Mus musculus OX=10090 GN=Pds5b PE=1 SV=1;tr|F8WHU5|F8WHU5_MOUSE Sister chromatid cohesion protein PDS5 homolog B OS=Mus musculus OX=10090 GN=Pds5b PE=1 SV=1	Q4VA53	Pds5b Aprin As3 Kiaa0979	Sister chromatid cohesion protein PDS5 homolog B (Androgen-induced proliferation inhibitor) (Androgen-induced prostate proliferative shutoff-associated protein AS3)	2	35	31	28.8	164.42	526580000	579350000	557950000	625780000	581480000	631220000	1.10494	0.0570792
tr|A0A0R4J1L2|A0A0R4J1L2_MOUSE;tr|F6ZFU0|F6ZFU0_MOUSE;tr|D3Z7N2|D3Z7N2_MOUSE	tr|A0A0R4J1L2|A0A0R4J1L2_MOUSE;tr|F6ZFU0|F6ZFU0_MOUSE;tr|D3Z7N2|D3Z7N2_MOUSE	tr|A0A0R4J1L2|A0A0R4J1L2_MOUSE Elongation factor 1-delta OS=Mus musculus OX=10090 GN=Eef1d PE=1 SV=1;tr|F6ZFU0|F6ZFU0_MOUSE Elongation factor 1-delta (Fragment) OS=Mus musculus OX=10090 GN=Eef1d PE=1 SV=1;tr|D3Z7N2|D3Z7N2_MOUSE Elongation factor 1-delta (F	A0A0R4J1L2	Eef1d mCG_22130	Elongation factor 1-delta (MCG22130, isoform CRA_a)	3	13	1	62.6	28.728	23150000	30362000	27484000	NaN	34659000	35776000	1.30442	0.0575769
sp|Q9CR57|RL14_MOUSE;tr|Q9CWK0|Q9CWK0_MOUSE;tr|A0A1L1SUF6|A0A1L1SUF6_MOUSE	sp|Q9CR57|RL14_MOUSE;tr|Q9CWK0|Q9CWK0_MOUSE	sp|Q9CR57|RL14_MOUSE 60S ribosomal protein L14 OS=Mus musculus OX=10090 GN=Rpl14 PE=1 SV=3;tr|Q9CWK0|Q9CWK0_MOUSE Uncharacterized protein OS=Mus musculus OX=10090 GN=Rpl14 PE=2 SV=1	Q9CR57	Rpl14	60S ribosomal protein L14	3	5	1	25.8	23.564	2033400000	2093400000	1854400000	1575200000	1672700000	1860300000	0.854043	0.057596
sp|Q9CPT4|MYDGF_MOUSE	sp|Q9CPT4|MYDGF_MOUSE	sp|Q9CPT4|MYDGF_MOUSE Myeloid-derived growth factor OS=Mus musculus OX=10090 GN=Mydgf PE=1 SV=1	Q9CPT4	Mydgf D17Wsu104e	Myeloid-derived growth factor (MYDGF)	1	5	5	28.3	17.982	156040000	157410000	143610000	178580000	179830000	160050000	1.13434	0.0576659
sp|Q9CR59|G45IP_MOUSE	sp|Q9CR59|G45IP_MOUSE	sp|Q9CR59|G45IP_MOUSE Growth arrest and DNA damage-inducible proteins-interacting protein 1 OS=Mus musculus OX=10090 GN=Gadd45gip1 PE=1 SV=1	Q9CR59	Gadd45gip1 Mrpl59	Growth arrest and DNA damage-inducible proteins-interacting protein 1 (39S ribosomal protein L59, mitochondrial) (MRP-L59)	1	6	6	32.9	25.82	115530000	98275000	86889000	75529000	82946000	67407000	0.751202	0.0577809
sp|P50544|ACADV_MOUSE;tr|B1AR28|B1AR28_MOUSE;tr|Q3UJR6|Q3UJR6_MOUSE	sp|P50544|ACADV_MOUSE;tr|B1AR28|B1AR28_MOUSE;tr|Q3UJR6|Q3UJR6_MOUSE	sp|P50544|ACADV_MOUSE Very long-chain specific acyl-CoA dehydrogenase, mitochondrial OS=Mus musculus OX=10090 GN=Acadvl PE=1 SV=3;tr|B1AR28|B1AR28_MOUSE Very long-chain-specific acyl-CoA dehydrogenase, mitochondrial OS=Mus musculus OX=10090 GN=Acadvl PE=1	P50544	Acadvl Vlcad	Very long-chain specific acyl-CoA dehydrogenase, mitochondrial (EC 1.3.8.9) (MVLCAD) (VLCAD)	3	32	32	62	70.875	1515500000	1409200000	1428400000	1372400000	1336900000	1369900000	0.937079	0.0578836
sp|Q9CZN7|GLYM_MOUSE	sp|Q9CZN7|GLYM_MOUSE	sp|Q9CZN7|GLYM_MOUSE Serine hydroxymethyltransferase, mitochondrial OS=Mus musculus OX=10090 GN=Shmt2 PE=1 SV=1	Q9CZN7	Shmt2	Serine hydroxymethyltransferase, mitochondrial (SHMT) (EC 2.1.2.1) (Glycine hydroxymethyltransferase) (Serine methylase)	1	30	29	68.5	55.758	5752200000	5467900000	5506100000	5870400000	5842600000	5762300000	1.04479	0.0579405
tr|Q2TBF9|Q2TBF9_MOUSE;sp|Q9CQV6|MLP3B_MOUSE;sp|Q91VR7|MLP3A_MOUSE;tr|M0QWC2|M0QWC2_MOUSE	tr|Q2TBF9|Q2TBF9_MOUSE;sp|Q9CQV6|MLP3B_MOUSE;sp|Q91VR7|MLP3A_MOUSE;tr|M0QWC2|M0QWC2_MOUSE	tr|Q2TBF9|Q2TBF9_MOUSE Microtubule-associated protein 1 light chain 3 beta OS=Mus musculus OX=10090 GN=Map1lc3b PE=2 SV=1;sp|Q9CQV6|MLP3B_MOUSE Microtubule-associated proteins 1A/1B light chain 3B OS=Mus musculus OX=10090 GN=Map1lc3b PE=1 SV=3;sp|Q91VR7|ML	Q2TBF9	Map1lc3b	Microtubule-associated protein 1 light chain 3 beta	4	3	3	22.4	14.665	59180000	51901000	NaN	78750000	65951000	71342000	1.29661	0.0580005
tr|B2RUM8|B2RUM8_MOUSE;sp|Q8K363|DDX18_MOUSE;tr|F6ZX28|F6ZX28_MOUSE;tr|Q9CSG7|Q9CSG7_MOUSE;tr|Q9CSJ2|Q9CSJ2_MOUSE	tr|B2RUM8|B2RUM8_MOUSE;sp|Q8K363|DDX18_MOUSE	tr|B2RUM8|B2RUM8_MOUSE RNA helicase OS=Mus musculus OX=10090 GN=Ddx18 PE=1 SV=1;sp|Q8K363|DDX18_MOUSE ATP-dependent RNA helicase DDX18 OS=Mus musculus OX=10090 GN=Ddx18 PE=1 SV=1	B2RUM8	Ddx18 mCG_1040626	RNA helicase (EC 3.6.4.13)	5	39	39	62	74.18	1767700000	1784700000	1595600000	1908800000	1930000000	1836300000	1.10239	0.0580033
tr|Q545E6|Q545E6_MOUSE;sp|Q62348|TSN_MOUSE	tr|Q545E6|Q545E6_MOUSE;sp|Q62348|TSN_MOUSE	tr|Q545E6|Q545E6_MOUSE RNA-binding protein OS=Mus musculus OX=10090 GN=Tsn PE=1 SV=1;sp|Q62348|TSN_MOUSE Translin OS=Mus musculus OX=10090 GN=Tsn PE=1 SV=1	Q545E6	Tsn Tbrbp mCG_3616	RNA-binding protein (Translin)	2	9	9	44.7	26.201	140310000	142590000	184020000	185470000	209050000	196740000	1.2663	0.0581223
tr|Q3UJ76|Q3UJ76_MOUSE;sp|P62743|AP2S1_MOUSE;tr|A0A0U1RPS0|A0A0U1RPS0_MOUSE;tr|Q7TT10|Q7TT10_MOUSE;tr|A0A0U1RQ06|A0A0U1RQ06_MOUSE	tr|Q3UJ76|Q3UJ76_MOUSE;sp|P62743|AP2S1_MOUSE;tr|A0A0U1RPS0|A0A0U1RPS0_MOUSE;tr|Q7TT10|Q7TT10_MOUSE	tr|Q3UJ76|Q3UJ76_MOUSE AP complex subunit sigma OS=Mus musculus OX=10090 GN=Ap2s1 PE=1 SV=1;sp|P62743|AP2S1_MOUSE AP-2 complex subunit sigma OS=Mus musculus OX=10090 GN=Ap2s1 PE=1 SV=1;tr|A0A0U1RPS0|A0A0U1RPS0_MOUSE AP-2 complex subunit sigma OS=Mus muscul	Q3UJ76	Ap2s1 mCG_50001	AP complex subunit sigma	5	5	5	38	17.018	118630000	112880000	124480000	133680000	132720000	156740000	1.18863	0.0586592
sp|Q9CYD3|CRTAP_MOUSE	sp|Q9CYD3|CRTAP_MOUSE	sp|Q9CYD3|CRTAP_MOUSE Cartilage-associated protein OS=Mus musculus OX=10090 GN=Crtap PE=1 SV=3	Q9CYD3	Crtap Casp	Cartilage-associated protein	1	6	6	18.8	46.169	58955000	46121000	55003000	61218000	64687000	69609000	1.22136	0.0588099
sp|Q8CIM8|INT4_MOUSE	sp|Q8CIM8|INT4_MOUSE	sp|Q8CIM8|INT4_MOUSE Integrator complex subunit 4 OS=Mus musculus OX=10090 GN=Ints4 PE=1 SV=1	Q8CIM8	Ints4	Integrator complex subunit 4 (Int4)	1	12	12	17.6	108.19	51556000	63751000	58774000	78865000	68701000	66894000	1.23196	0.0588701
tr|H3BJ97|H3BJ97_MOUSE;sp|Q99JR5|TINAL_MOUSE;tr|Q4FJX7|Q4FJX7_MOUSE;tr|H3BKM8|H3BKM8_MOUSE	tr|H3BJ97|H3BJ97_MOUSE;sp|Q99JR5|TINAL_MOUSE;tr|Q4FJX7|Q4FJX7_MOUSE	tr|H3BJ97|H3BJ97_MOUSE Tubulointerstitial nephritis antigen-like OS=Mus musculus OX=10090 GN=Tinagl1 PE=1 SV=1;sp|Q99JR5|TINAL_MOUSE Tubulointerstitial nephritis antigen-like OS=Mus musculus OX=10090 GN=Tinagl1 PE=1 SV=1;tr|Q4FJX7|Q4FJX7_MOUSE Lcn7 protein	H3BJ97	Tinagl1	Tubulointerstitial nephritis antigen-like	4	12	12	44.4	49.276	374760000	389680000	321350000	305570000	316080000	275870000	0.826606	0.0590048
sp|O35638|STAG2_MOUSE;tr|A2AFF6|A2AFF6_MOUSE;tr|Q3TG33|Q3TG33_MOUSE;tr|Q8BSB5|Q8BSB5_MOUSE;tr|Q3UQG8|Q3UQG8_MOUSE;tr|A0A1B0GXA7|A0A1B0GXA7_MOUSE	sp|O35638|STAG2_MOUSE;tr|A2AFF6|A2AFF6_MOUSE	sp|O35638|STAG2_MOUSE Cohesin subunit SA-2 OS=Mus musculus OX=10090 GN=Stag2 PE=1 SV=3;tr|A2AFF6|A2AFF6_MOUSE Cohesin subunit SA-2 OS=Mus musculus OX=10090 GN=Stag2 PE=1 SV=1	O35638	Stag2 Sa2 Sap2	Cohesin subunit SA-2 (SCC3 homolog 2) (Stromal antigen 2)	6	20	16	21.3	141.28	216180000	226720000	228950000	235540000	240460000	258300000	1.09295	0.0590361
sp|Q5SUF2|LC7L3_MOUSE;tr|F8WGA8|F8WGA8_MOUSE	sp|Q5SUF2|LC7L3_MOUSE	sp|Q5SUF2|LC7L3_MOUSE Luc7-like protein 3 OS=Mus musculus OX=10090 GN=Luc7l3 PE=1 SV=1	Q5SUF2	Luc7l3 Crop	Luc7-like protein 3 (Cisplatin resistance-associated-overexpressed protein)	2	16	16	41.4	51.45	650740000	619010000	639720000	611750000	605410000	615680000	0.959868	0.0591466
sp|Q61687|ATRX_MOUSE;tr|F6RDB7|F6RDB7_MOUSE;tr|Q3UZ76|Q3UZ76_MOUSE;tr|Q3TSV4|Q3TSV4_MOUSE;tr|Q8BSH0|Q8BSH0_MOUSE;tr|Q8C2S3|Q8C2S3_MOUSE;tr|A0A0G2JED2|A0A0G2JED2_MOUSE;tr|A0A0G2JFG6|A0A0G2JFG6_MOUSE;tr|Q3TA30|Q3TA30_MOUSE;tr|Q8C4Z6|Q8C4Z6_MOUSE;tr|A0A0G2JF35|A0A0G2JF35_MOUSE;tr|A0A0G2JFR8|A0A0G2JFR8_MOUSE;tr|Q3UU22|Q3UU22_MOUSE	sp|Q61687|ATRX_MOUSE	sp|Q61687|ATRX_MOUSE Transcriptional regulator ATRX OS=Mus musculus OX=10090 GN=Atrx PE=1 SV=3	Q61687	Atrx Hp1bp2 Xnp	Transcriptional regulator ATRX (EC 3.6.4.12) (ATP-dependent helicase ATRX) (HP1 alpha-interacting protein) (HP1-BP38 protein) (Heterochromatin protein 2) (X-linked nuclear protein)	13	40	30	23.4	278.58	550830000	534770000	509130000	488160000	494300000	507420000	0.934252	0.0596058
tr|Q3UHA6|Q3UHA6_MOUSE;sp|P70255|NFIC_MOUSE;tr|A0A1Y7VK55|A0A1Y7VK55_MOUSE	tr|Q3UHA6|Q3UHA6_MOUSE;sp|P70255|NFIC_MOUSE;tr|A0A1Y7VK55|A0A1Y7VK55_MOUSE	tr|Q3UHA6|Q3UHA6_MOUSE Nuclear factor 1 OS=Mus musculus OX=10090 GN=Nfic PE=2 SV=1;sp|P70255|NFIC_MOUSE Nuclear factor 1 C-type OS=Mus musculus OX=10090 GN=Nfic PE=1 SV=1;tr|A0A1Y7VK55|A0A1Y7VK55_MOUSE Nuclear factor 1 OS=Mus musculus OX=10090 GN=Nfic PE=1	Q3UHA6	Nfic	Nuclear factor 1	3	9	7	18.7	47.532	135360000	133650000	120910000	119730000	104830000	115600000	0.872384	0.0596593
sp|Q8BM72|HSP13_MOUSE;tr|D3Z0Y0|D3Z0Y0_MOUSE	sp|Q8BM72|HSP13_MOUSE	sp|Q8BM72|HSP13_MOUSE Heat shock 70 kDa protein 13 OS=Mus musculus OX=10090 GN=Hspa13 PE=1 SV=1	Q8BM72	Hspa13 Stch	Heat shock 70 kDa protein 13 (Microsomal stress-70 protein ATPase core) (Stress-70 protein chaperone microsome-associated 60 kDa protein)	2	10	10	23.4	51.709	93344000	102150000	95361000	86608000	83568000	65743000	0.811122	0.0597847
tr|Q69ZB9|Q69ZB9_MOUSE;sp|Q64151|SEM4C_MOUSE	tr|Q69ZB9|Q69ZB9_MOUSE;sp|Q64151|SEM4C_MOUSE	tr|Q69ZB9|Q69ZB9_MOUSE MKIAA1739 protein (Fragment) OS=Mus musculus OX=10090 GN=Sema4c PE=2 SV=1;sp|Q64151|SEM4C_MOUSE Semaphorin-4C OS=Mus musculus OX=10090 GN=Sema4c PE=1 SV=1	Q69ZB9	Sema4c mKIAA1739	MKIAA1739 protein (Fragment)	2	7	7	14	84.161	106240000	108630000	98349000	97152000	90224000	96270000	0.905584	0.0601313
sp|Q7TPR4|ACTN1_MOUSE;tr|Q99LJ3|Q99LJ3_MOUSE;sp|Q9JI91|ACTN2_MOUSE;tr|Q5FW75|Q5FW75_MOUSE;tr|Q8K3Q4|Q8K3Q4_MOUSE;sp|O88990|ACTN3_MOUSE;tr|A0A1Y7VMW4|A0A1Y7VMW4_MOUSE;tr|Q9CTH3|Q9CTH3_MOUSE;tr|Q3UYE4|Q3UYE4_MOUSE	sp|Q7TPR4|ACTN1_MOUSE	sp|Q7TPR4|ACTN1_MOUSE Alpha-actinin-1 OS=Mus musculus OX=10090 GN=Actn1 PE=1 SV=1	Q7TPR4	Actn1	Alpha-actinin-1 (Alpha-actinin cytoskeletal isoform) (F-actin cross-linking protein) (Non-muscle alpha-actinin-1)	9	63	3	73.8	103.07	12122000000	12171000000	12251000000	13652000000	12537000000	14228000000	1.10598	0.0604558
tr|Q8BMP9|Q8BMP9_MOUSE;tr|Q5U412|Q5U412_MOUSE;tr|Q3UA28|Q3UA28_MOUSE;tr|Q3U9H4|Q3U9H4_MOUSE;tr|Q3U573|Q3U573_MOUSE;tr|Q3TUR1|Q3TUR1_MOUSE;tr|Q3TG02|Q3TG02_MOUSE;sp|P46978|STT3A_MOUSE;tr|A0A1S6GWK0|A0A1S6GWK0_MOUSE;tr|Q3TVN9|Q3TVN9_MOUSE;tr|Q3U547|Q3U547_MOUSE;tr|Q8BWT4|Q8BWT4_MOUSE;tr|D3YZN5|D3YZN5_MOUSE	tr|Q8BMP9|Q8BMP9_MOUSE;tr|Q5U412|Q5U412_MOUSE;tr|Q3UA28|Q3UA28_MOUSE;tr|Q3U9H4|Q3U9H4_MOUSE;tr|Q3U573|Q3U573_MOUSE;tr|Q3TUR1|Q3TUR1_MOUSE;tr|Q3TG02|Q3TG02_MOUSE;sp|P46978|STT3A_MOUSE;tr|A0A1S6GWK0|A0A1S6GWK0_MOUSE;tr|Q3TVN9|Q3TVN9_MOUSE;tr|Q3U547|Q3U547_MOUSE	tr|Q8BMP9|Q8BMP9_MOUSE Uncharacterized protein OS=Mus musculus OX=10090 GN=Stt3a PE=2 SV=1;tr|Q5U412|Q5U412_MOUSE STT3, subunit of the oligosaccharyltransferase complex, homolog A (S. cerevisiae) OS=Mus musculus OX=10090 GN=Stt3a PE=2 SV=1;tr|Q3UA28|Q3UA28	Q8BMP9	Stt3a Itm1	Uncharacterized protein	13	21	20	30.1	80.53	1915500000	1787900000	1752000000	1657000000	1662000000	1719900000	0.923654	0.06055
sp|Q99J27|ACATN_MOUSE;tr|Q3UWI3|Q3UWI3_MOUSE;tr|Q3UXZ5|Q3UXZ5_MOUSE	sp|Q99J27|ACATN_MOUSE	sp|Q99J27|ACATN_MOUSE Acetyl-coenzyme A transporter 1 OS=Mus musculus OX=10090 GN=Slc33a1 PE=1 SV=1	Q99J27	Slc33a1 Acatn	Acetyl-coenzyme A transporter 1 (AT-1) (Acetyl-CoA transporter 1) (Solute carrier family 33 member 1)	3	3	3	5.8	61.075	32513000	29556000	28067000	27787000	22429000	23881000	0.822058	0.0607952
sp|P01900|HA12_MOUSE;tr|K7W4D1|K7W4D1_MOUSE;sp|P01895|HA1Y_MOUSE;tr|D2YW38|D2YW38_MOUSE;tr|A0A286R3P5|A0A286R3P5_MOUSE;tr|Q61895|Q61895_MOUSE;tr|A0A2Z4SYQ2|A0A2Z4SYQ2_MOUSE;tr|A0A2Z4SXY7|A0A2Z4SXY7_MOUSE;tr|A0A2Z4SXT8|A0A2Z4SXT8_MOUSE;tr|A0A2Z4SXN6|A0A2Z4SXN6_MOUSE;tr|O19476|O19476_MOUSE;tr|A0A218PH06|A0A218PH06_MOUSE;sp|P14427|HA14_MOUSE;tr|A0A2Z4SZP0|A0A2Z4SZP0_MOUSE;tr|A0A2Z4T3T7|A0A2Z4T3T7_MO…	sp|P01900|HA12_MOUSE;tr|K7W4D1|K7W4D1_MOUSE;sp|P01895|HA1Y_MOUSE	sp|P01900|HA12_MOUSE H-2 class I histocompatibility antigen, D-D alpha chain OS=Mus musculus OX=10090 GN=H2-D1 PE=1 SV=1;tr|K7W4D1|K7W4D1_MOUSE MHC class I antigen (Fragment) OS=Mus musculus OX=10090 GN=H2-D PE=2 SV=1;sp|P01895|HA1Y_MOUSE H-2 class I histo	P01900	H2-D1	H-2 class I histocompatibility antigen, D-D alpha chain (H-2D(D))	34	16	0	43.6	41.11	313620000	325850000	277890000	276000000	265310000	252940000	0.8658	0.0608065
tr|Q0PD54|Q0PD54_MOUSE;sp|P35279|RAB6A_MOUSE;tr|Q3U4W5|Q3U4W5_MOUSE;tr|D3YV69|D3YV69_MOUSE;tr|Q0PD15|Q0PD15_MOUSE;sp|Q8BHD0|RB39A_MOUSE	tr|Q0PD54|Q0PD54_MOUSE;sp|P35279|RAB6A_MOUSE;tr|Q3U4W5|Q3U4W5_MOUSE;tr|D3YV69|D3YV69_MOUSE	tr|Q0PD54|Q0PD54_MOUSE RAB6, member RAS oncogene family, isoform CRA_a OS=Mus musculus OX=10090 GN=Rab6a PE=2 SV=1;sp|P35279|RAB6A_MOUSE Ras-related protein Rab-6A OS=Mus musculus OX=10090 GN=Rab6a PE=1 SV=4;tr|Q3U4W5|Q3U4W5_MOUSE RAB6, member RAS oncogene	Q0PD54	Rab6a Rab6 Rab6A mCG_2848	RAB6, member RAS oncogene family, isoform CRA_a (Rab6A)	6	15	7	65.4	23.59	1004900000	983190000	937310000	1022800000	1067400000	1138600000	1.10371	0.0611912
sp|Q9WV02|RBMX_MOUSE;tr|A2AFI3|A2AFI3_MOUSE;tr|S4R1F6|S4R1F6_MOUSE;tr|A2AFI4|A2AFI4_MOUSE;tr|Q9DAE2|Q9DAE2_MOUSE	sp|Q9WV02|RBMX_MOUSE;tr|A2AFI3|A2AFI3_MOUSE;tr|S4R1F6|S4R1F6_MOUSE	sp|Q9WV02|RBMX_MOUSE RNA-binding motif protein, X chromosome OS=Mus musculus OX=10090 GN=Rbmx PE=1 SV=1;tr|A2AFI3|A2AFI3_MOUSE RNA binding motif protein, X chromosome, isoform CRA_b OS=Mus musculus OX=10090 GN=Rbmx PE=1 SV=1;tr|S4R1F6|S4R1F6_MOUSE RNA bind	Q9WV02	Rbmx Hnrnpg Hnrpg Rbmxp1 Rbmxrt	RNA-binding motif protein, X chromosome (Heterogeneous nuclear ribonucleoprotein G) (hnRNP G) [Cleaved into: RNA-binding motif protein, X chromosome, N-terminally processed]	5	21	4	49.4	42.3	40375000	39781000	34595000	33082000	33921000	33439000	0.875304	0.0615997
tr|Q6P1A9|Q6P1A9_MOUSE;tr|Q5EBG5|Q5EBG5_MOUSE;tr|Q58ET1|Q58ET1_MOUSE;sp|P12970|RL7A_MOUSE;tr|Q80UT7|Q80UT7_MOUSE;tr|Q8CDE3|Q8CDE3_MOUSE;tr|V9GX35|V9GX35_MOUSE	tr|Q6P1A9|Q6P1A9_MOUSE;tr|Q5EBG5|Q5EBG5_MOUSE;tr|Q58ET1|Q58ET1_MOUSE;sp|P12970|RL7A_MOUSE;tr|Q80UT7|Q80UT7_MOUSE	tr|Q6P1A9|Q6P1A9_MOUSE Ribosomal protein L7A OS=Mus musculus OX=10090 GN=Rpl7a PE=2 SV=1;tr|Q5EBG5|Q5EBG5_MOUSE Ribosomal protein L7A OS=Mus musculus OX=10090 GN=Rpl7a PE=2 SV=1;tr|Q58ET1|Q58ET1_MOUSE MCG11348 OS=Mus musculus OX=10090 GN=Rpl7a PE=1 SV=1;sp	Q6P1A9	Rpl7a	Ribosomal protein L7A	7	20	20	56.8	30.024	4108900000	3736100000	3994200000	4346300000	4425000000	4140000000	1.09056	0.0621447
sp|P48771|CX7A2_MOUSE	sp|P48771|CX7A2_MOUSE	sp|P48771|CX7A2_MOUSE Cytochrome c oxidase subunit 7A2, mitochondrial OS=Mus musculus OX=10090 GN=Cox7a2 PE=1 SV=2	P48771	Cox7a2 Cox7a3 Cox7al	Cytochrome c oxidase subunit 7A2, mitochondrial (Cytochrome c oxidase subunit VIIa-liver/heart) (Cytochrome c oxidase subunit VIIa-L)	1	2	2	27.7	9.2908	258060000	280890000	293880000	385860000	367890000	298800000	1.26382	0.0621534
tr|Q91VZ1|Q91VZ1_MOUSE;tr|Q3U5L3|Q3U5L3_MOUSE;sp|Q9CWK8|SNX2_MOUSE	tr|Q91VZ1|Q91VZ1_MOUSE;tr|Q3U5L3|Q3U5L3_MOUSE;sp|Q9CWK8|SNX2_MOUSE	tr|Q91VZ1|Q91VZ1_MOUSE Snx2 protein OS=Mus musculus OX=10090 GN=Snx2 PE=2 SV=1;tr|Q3U5L3|Q3U5L3_MOUSE Uncharacterized protein OS=Mus musculus OX=10090 GN=Snx2 PE=2 SV=1;sp|Q9CWK8|SNX2_MOUSE Sorting nexin-2 OS=Mus musculus OX=10090 GN=Snx2 PE=1 SV=2	Q91VZ1	Snx2	Snx2 protein (Sorting nexin 2)	3	7	6	16.8	58.452	29958000	33444000	32763000	44576000	35110000	39113000	1.23537	0.0624299
sp|Q99KG3|RBM10_MOUSE	sp|Q99KG3|RBM10_MOUSE	sp|Q99KG3|RBM10_MOUSE RNA-binding protein 10 OS=Mus musculus OX=10090 GN=Rbm10 PE=1 SV=1	Q99KG3	Rbm10 Kiaa0122	RNA-binding protein 10 (RNA-binding motif protein 10)	1	16	8	20.6	103.49	146230000	145090000	156210000	158510000	156750000	163520000	1.06983	0.0627981
tr|Q6PDS4|Q6PDS4_MOUSE;tr|Q3UG34|Q3UG34_MOUSE;tr|Q3TV21|Q3TV21_MOUSE;sp|O35943|FRDA_MOUSE	tr|Q6PDS4|Q6PDS4_MOUSE;tr|Q3UG34|Q3UG34_MOUSE;tr|Q3TV21|Q3TV21_MOUSE;sp|O35943|FRDA_MOUSE	tr|Q6PDS4|Q6PDS4_MOUSE Fxn protein OS=Mus musculus OX=10090 GN=Fxn PE=2 SV=1;tr|Q3UG34|Q3UG34_MOUSE Uncharacterized protein OS=Mus musculus OX=10090 GN=Fxn PE=2 SV=1;tr|Q3TV21|Q3TV21_MOUSE Frataxin OS=Mus musculus OX=10090 GN=Fxn PE=1 SV=1;sp|O35943|FRDA_M	Q6PDS4	Fxn	Fxn protein	4	3	3	34.7	11.084	37113000	41618000	37304000	32604000	30823000	36148000	0.858146	0.0629953
tr|E9QKA4|E9QKA4_MOUSE;tr|A2A8V8|A2A8V8_MOUSE;tr|A2A8V9|A2A8V9_MOUSE;tr|E9PUK6|E9PUK6_MOUSE;sp|Q52KI8|SRRM1_MOUSE;tr|A2A983|A2A983_MOUSE;tr|F6T4M4|F6T4M4_MOUSE;tr|F7BWM1|F7BWM1_MOUSE;tr|F6UK16|F6UK16_MOUSE	tr|E9QKA4|E9QKA4_MOUSE;tr|A2A8V8|A2A8V8_MOUSE;tr|A2A8V9|A2A8V9_MOUSE;tr|E9PUK6|E9PUK6_MOUSE;sp|Q52KI8|SRRM1_MOUSE	tr|E9QKA4|E9QKA4_MOUSE Serine/arginine repetitive matrix protein 1 OS=Mus musculus OX=10090 GN=Srrm1 PE=1 SV=1;tr|A2A8V8|A2A8V8_MOUSE Serine/arginine repetitive matrix protein 1 OS=Mus musculus OX=10090 GN=Srrm1 PE=1 SV=1;tr|A2A8V9|A2A8V9_MOUSE Serine/argi	E9QKA4	Srrm1	Serine/arginine repetitive matrix protein 1	9	8	8	11.3	101.16	312050000	273430000	315360000	352240000	329610000	334720000	1.12847	0.0630206
tr|A4QMQ0|A4QMQ0_MOUSE;sp|Q9CZD5|IF3M_MOUSE	tr|A4QMQ0|A4QMQ0_MOUSE;sp|Q9CZD5|IF3M_MOUSE	tr|A4QMQ0|A4QMQ0_MOUSE Mitochondrial translational initiation factor 3 OS=Mus musculus OX=10090 GN=Mtif3 PE=2 SV=1;sp|Q9CZD5|IF3M_MOUSE Translation initiation factor IF-3, mitochondrial OS=Mus musculus OX=10090 GN=Mtif3 PE=1 SV=1	A4QMQ0	Mtif3 2810012L14Rik mCG_12747	Mitochondrial translational initiation factor 3 (RIKEN cDNA 2810012L14)	2	3	3	23.9	31.739	17379000	NaN	19089000	NaN	12570000	14400000	0.739552	0.0630329
tr|Q921Y1|Q921Y1_MOUSE;tr|G3X8X0|G3X8X0_MOUSE;tr|Q80TX4|Q80TX4_MOUSE;tr|Q05BH3|Q05BH3_MOUSE;tr|Q9CRI3|Q9CRI3_MOUSE;tr|G3UXT5|G3UXT5_MOUSE	tr|Q921Y1|Q921Y1_MOUSE;tr|G3X8X0|G3X8X0_MOUSE;tr|Q80TX4|Q80TX4_MOUSE;tr|Q05BH3|Q05BH3_MOUSE	tr|Q921Y1|Q921Y1_MOUSE DEAH (Asp-Glu-Ala-His) box polypeptide 16 OS=Mus musculus OX=10090 GN=Dhx16 PE=2 SV=1;tr|G3X8X0|G3X8X0_MOUSE DEAH (Asp-Glu-Ala-His) box polypeptide 16 OS=Mus musculus OX=10090 GN=Dhx16 PE=1 SV=1;tr|Q80TX4|Q80TX4_MOUSE MKIAA0577 prote	Q921Y1	Dhx16	DEAH (Asp-Glu-Ala-His) box polypeptide 16	6	13	12	15	119.09	38425000	37715000	44625000	55246000	43909000	53024000	1.26013	0.0632248
sp|Q8C2Q3|RBM14_MOUSE;tr|Q3U6A2|Q3U6A2_MOUSE;tr|E9QL13|E9QL13_MOUSE;tr|Q62019|Q62019_MOUSE;tr|J3QN51|J3QN51_MOUSE;tr|J3QPT3|J3QPT3_MOUSE;tr|J3QQ01|J3QQ01_MOUSE	sp|Q8C2Q3|RBM14_MOUSE;tr|Q3U6A2|Q3U6A2_MOUSE;tr|E9QL13|E9QL13_MOUSE;tr|Q62019|Q62019_MOUSE	sp|Q8C2Q3|RBM14_MOUSE RNA-binding protein 14 OS=Mus musculus OX=10090 GN=Rbm14 PE=1 SV=1;tr|Q3U6A2|Q3U6A2_MOUSE Uncharacterized protein OS=Mus musculus OX=10090 GN=Rbm14 PE=2 SV=1;tr|E9QL13|E9QL13_MOUSE MCG8382, isoform CRA_c OS=Mus musculus OX=10090 GN=Rb	Q8C2Q3	Rbm14	RNA-binding protein 14 (RNA-binding motif protein 14)	7	25	20	48.9	69.448	890420000	839550000	906620000	1003900000	911430000	1010400000	1.10966	0.0633814
sp|Q9D074|MGRN1_MOUSE;tr|Q8CAR4|Q8CAR4_MOUSE;tr|F7D0T8|F7D0T8_MOUSE;tr|A2AAP0|A2AAP0_MOUSE;tr|A2AAN9|A2AAN9_MOUSE;sp|Q3TEL6|RN157_MOUSE	sp|Q9D074|MGRN1_MOUSE	sp|Q9D074|MGRN1_MOUSE E3 ubiquitin-protein ligase MGRN1 OS=Mus musculus OX=10090 GN=Mgrn1 PE=1 SV=2	Q9D074	Mgrn1 Kiaa0544	E3 ubiquitin-protein ligase MGRN1 (EC 2.3.2.27) (Mahogunin RING finger protein 1) (RING-type E3 ubiquitin transferase MGRN1)	6	4	4	12.2	58.477	18281000	16407000	NaN	NaN	12985000	10756000	0.684415	0.0640425
tr|F8VPM0|F8VPM0_MOUSE;tr|E9Q374|E9Q374_MOUSE;sp|Q91YE5|BAZ2A_MOUSE;tr|A0A1W2P6X9|A0A1W2P6X9_MOUSE;tr|Q6PE75|Q6PE75_MOUSE;tr|Q8BRP6|Q8BRP6_MOUSE;tr|Q3UET2|Q3UET2_MOUSE;tr|Q3USB1|Q3USB1_MOUSE;tr|Q3UXC9|Q3UXC9_MOUSE;tr|Q05CX2|Q05CX2_MOUSE;tr|Q80VL8|Q80VL8_MOUSE;tr|A0A1W2P6L0|A0A1W2P6L0_MOUSE;tr|Q3V0H2|Q3V0H2_MOUSE;tr|Q8CGH2|Q8CGH2_MOUSE	tr|F8VPM0|F8VPM0_MOUSE;tr|E9Q374|E9Q374_MOUSE;sp|Q91YE5|BAZ2A_MOUSE;tr|A0A1W2P6X9|A0A1W2P6X9_MOUSE	tr|F8VPM0|F8VPM0_MOUSE Bromodomain adjacent to zinc finger domain protein 2A OS=Mus musculus OX=10090 GN=Baz2a PE=1 SV=1;tr|E9Q374|E9Q374_MOUSE Bromodomain adjacent to zinc finger domain protein 2A OS=Mus musculus OX=10090 GN=Baz2a PE=1 SV=1;sp|Q91YE5|BAZ2	F8VPM0	Baz2a	Bromodomain adjacent to zinc finger domain protein 2A	14	7	7	5.7	209.4	36625000	50272000	41377000	30960000	33662000	32644000	0.758267	0.0642855
sp|Q91YT8|CSCL1_MOUSE;tr|E0CX44|E0CX44_MOUSE;tr|E0CXM3|E0CXM3_MOUSE	sp|Q91YT8|CSCL1_MOUSE	sp|Q91YT8|CSCL1_MOUSE CSC1-like protein 1 OS=Mus musculus OX=10090 GN=Tmem63a PE=1 SV=1	Q91YT8	Tmem63a Kiaa0792	CSC1-like protein 1 (Transmembrane protein 63A)	3	7	7	8.7	91.859	86196000	85497000	74508000	71346000	72514000	73277000	0.88195	0.064531
sp|Q7TMI3|UHRF2_MOUSE;tr|Q3TCM1|Q3TCM1_MOUSE;tr|Q3T995|Q3T995_MOUSE	sp|Q7TMI3|UHRF2_MOUSE	sp|Q7TMI3|UHRF2_MOUSE E3 ubiquitin-protein ligase UHRF2 OS=Mus musculus OX=10090 GN=Uhrf2 PE=1 SV=1	Q7TMI3	Uhrf2 Nirf	E3 ubiquitin-protein ligase UHRF2 (EC 2.3.2.27) (NIRF) (Np95-like ring finger protein) (Nuclear protein 97) (Nuclear zinc finger protein Np97) (RING-type E3 ubiquitin transferase UHRF2) (Ubiquitin-like PHD and RING finger domain-containing protein 2) (Ubiquitin-like-containing PHD and RING finger domains protein 2)	3	11	9	16.6	90.105	50807000	44684000	37732000	37495000	29310000	22099000	0.667332	0.0645354
tr|Q4FK22|Q4FK22_MOUSE;sp|Q9DC16|ERGI1_MOUSE;tr|Q69ZP5|Q69ZP5_MOUSE;tr|F6SLP4|F6SLP4_MOUSE;tr|F6Z6A5|F6Z6A5_MOUSE	tr|Q4FK22|Q4FK22_MOUSE;sp|Q9DC16|ERGI1_MOUSE;tr|Q69ZP5|Q69ZP5_MOUSE	tr|Q4FK22|Q4FK22_MOUSE 1200007D18Rik protein OS=Mus musculus OX=10090 GN=Ergic1 PE=1 SV=1;sp|Q9DC16|ERGI1_MOUSE Endoplasmic reticulum-Golgi intermediate compartment protein 1 OS=Mus musculus OX=10090 GN=Ergic1 PE=1 SV=1;tr|Q69ZP5|Q69ZP5_MOUSE MKIAA1181 pro	Q4FK22	Ergic1 1200007D18Rik maa-136 mCG_1583	1200007D18Rik protein (MAA-136 protein) (RIKEN cDNA 1200007D18)	5	9	9	42.4	32.562	530210000	521610000	484780000	565490000	537950000	555330000	1.07951	0.0645615
tr|Q3UC02|Q3UC02_MOUSE;sp|P62281|RS11_MOUSE;tr|Q9DB79|Q9DB79_MOUSE;tr|A0A1B0GRR3|A0A1B0GRR3_MOUSE;tr|A0A1B0GSE8|A0A1B0GSE8_MOUSE;tr|Q9D0P6|Q9D0P6_MOUSE;tr|Q9CW75|Q9CW75_MOUSE	tr|Q3UC02|Q3UC02_MOUSE;sp|P62281|RS11_MOUSE;tr|Q9DB79|Q9DB79_MOUSE;tr|A0A1B0GRR3|A0A1B0GRR3_MOUSE;tr|A0A1B0GSE8|A0A1B0GSE8_MOUSE;tr|Q9D0P6|Q9D0P6_MOUSE	tr|Q3UC02|Q3UC02_MOUSE MCG23457 OS=Mus musculus OX=10090 GN=Rps11 PE=1 SV=1;sp|P62281|RS11_MOUSE 40S ribosomal protein S11 OS=Mus musculus OX=10090 GN=Rps11 PE=1 SV=3;tr|Q9DB79|Q9DB79_MOUSE Uncharacterized protein OS=Mus musculus OX=10090 GN=Rps11 PE=2 SV=	Q3UC02	Rps11 mCG_23457	MCG23457	7	12	12	57.6	18.431	2660700000	2723300000	2607500000	2906400000	3193700000	3721400000	1.22899	0.0645822
sp|Q8BUE4|AIFM2_MOUSE	sp|Q8BUE4|AIFM2_MOUSE	sp|Q8BUE4|AIFM2_MOUSE Apoptosis-inducing factor 2 OS=Mus musculus OX=10090 GN=Aifm2 PE=1 SV=1	Q8BUE4	Aifm2 Amid	Apoptosis-inducing factor 2 (EC 1.-.-.-) (Apoptosis-inducing factor homologous mitochondrion-associated inducer of death) (Apoptosis-inducing factor-like mitochondrion-associated inducer of death)	1	4	4	10.2	40.634	28970000	32786000	30694000	27377000	28783000	26919000	0.898637	0.0650867
tr|Q3U343|Q3U343_MOUSE;sp|Q91VY9|ZN622_MOUSE;tr|Q3TCX4|Q3TCX4_MOUSE;tr|A0A2I3BPL6|A0A2I3BPL6_MOUSE	tr|Q3U343|Q3U343_MOUSE;sp|Q91VY9|ZN622_MOUSE;tr|Q3TCX4|Q3TCX4_MOUSE	tr|Q3U343|Q3U343_MOUSE Uncharacterized protein OS=Mus musculus OX=10090 GN=Zfp622 PE=2 SV=1;sp|Q91VY9|ZN622_MOUSE Zinc finger protein 622 OS=Mus musculus OX=10090 GN=Znf622 PE=1 SV=1;tr|Q3TCX4|Q3TCX4_MOUSE Uncharacterized protein OS=Mus musculus OX=10090 G	Q3U343	Zfp622	C2H2-type domain-containing protein	4	5	5	14.9	53.407	21189000	24105000	25183000	29254000	40106000	29558000	1.40355	0.065351
sp|Q9CZN8|GATA_MOUSE	sp|Q9CZN8|GATA_MOUSE	sp|Q9CZN8|GATA_MOUSE Glutamyl-tRNA(Gln) amidotransferase subunit A, mitochondrial OS=Mus musculus OX=10090 GN=Qrsl1 PE=1 SV=1	Q9CZN8	Qrsl1	Glutamyl-tRNA(Gln) amidotransferase subunit A, mitochondrial (Glu-AdT subunit A) (EC 6.3.5.7) (Glutaminyl-tRNA synthase-like protein 1)	1	11	11	27.8	56.782	39820000	32613000	42737000	60318000	44728000	51182000	1.3565	0.0653897
tr|Q3TET5|Q3TET5_MOUSE;sp|Q9CXT8|MPPB_MOUSE;tr|D3Z1T9|D3Z1T9_MOUSE	tr|Q3TET5|Q3TET5_MOUSE;sp|Q9CXT8|MPPB_MOUSE	tr|Q3TET5|Q3TET5_MOUSE Uncharacterized protein (Fragment) OS=Mus musculus OX=10090 GN=Pmpcb PE=2 SV=1;sp|Q9CXT8|MPPB_MOUSE Mitochondrial-processing peptidase subunit beta OS=Mus musculus OX=10090 GN=Pmpcb PE=1 SV=1	Q3TET5	Pmpcb	Uncharacterized protein (Fragment)	3	20	19	56.2	53.741	849970000	909430000	795980000	739030000	706660000	794880000	0.876805	0.0655221
tr|A1L3S7|A1L3S7_MOUSE;sp|Q8VHR5|P66B_MOUSE;tr|Q69ZQ5|Q69ZQ5_MOUSE;tr|A0A0U1RNM2|A0A0U1RNM2_MOUSE;tr|Q6PAH8|Q6PAH8_MOUSE	tr|A1L3S7|A1L3S7_MOUSE;sp|Q8VHR5|P66B_MOUSE;tr|Q69ZQ5|Q69ZQ5_MOUSE	tr|A1L3S7|A1L3S7_MOUSE Gatad2b protein OS=Mus musculus OX=10090 GN=Gatad2b PE=1 SV=1;sp|Q8VHR5|P66B_MOUSE Transcriptional repressor p66-beta OS=Mus musculus OX=10090 GN=Gatad2b PE=1 SV=1;tr|Q69ZQ5|Q69ZQ5_MOUSE MKIAA1150 protein (Fragment) OS=Mus musculus O	A1L3S7	Gatad2b	Gatad2b protein (Transcriptional repressor p66-beta)	5	13	13	34.1	63.638	117640000	132290000	144770000	167890000	143740000	168280000	1.21589	0.0655598
tr|Q7M754|Q7M754_MOUSE;tr|Q792Z1|Q792Z1_MOUSE	tr|Q7M754|Q7M754_MOUSE;tr|Q792Z1|Q792Z1_MOUSE	tr|Q7M754|Q7M754_MOUSE Try10-like trypsinogen OS=Mus musculus OX=10090 GN=Gm5409 PE=2 SV=1;tr|Q792Z1|Q792Z1_MOUSE MCG140784 OS=Mus musculus OX=10090 GN=Try10 PE=1 SV=1	Q7M754	Gm5409 EG386551 EG436523 Try10l	Try10-like trypsinogen	2	2	2	8.1	26.531	387750000	325960000	238670000	220240000	169780000	214460000	0.634705	0.0656322
sp|Q924Z4|CERS2_MOUSE;tr|D3YTM0|D3YTM0_MOUSE;tr|D3Z0Z2|D3Z0Z2_MOUSE;tr|D3Z4M2|D3Z4M2_MOUSE	sp|Q924Z4|CERS2_MOUSE;tr|D3YTM0|D3YTM0_MOUSE;tr|D3Z0Z2|D3Z0Z2_MOUSE	sp|Q924Z4|CERS2_MOUSE Ceramide synthase 2 OS=Mus musculus OX=10090 GN=Cers2 PE=1 SV=1;tr|D3YTM0|D3YTM0_MOUSE Ceramide synthase 2 (Fragment) OS=Mus musculus OX=10090 GN=Cers2 PE=1 SV=1;tr|D3Z0Z2|D3Z0Z2_MOUSE Ceramide synthase 2 (Fragment) OS=Mus musculus OX	Q924Z4	Cers2 Lass2 Trh3	Ceramide synthase 2 (CerS2) (EC 2.3.1.-) (LAG1 longevity assurance homolog 2) (Sphingosine N-acyltransferase CERS2) (EC 2.3.1.24) (Translocating chain-associating membrane protein homolog 3) (TRAM homolog 3)	4	7	7	22.6	45.024	323810000	402820000	386560000	322790000	298680000	300960000	0.828637	0.0657172
sp|P62814|VATB2_MOUSE;tr|A0A1S6GWG6|A0A1S6GWG6_MOUSE;tr|Q99KA3|Q99KA3_MOUSE;tr|Q6P6I3|Q6P6I3_MOUSE;tr|Q91YH6|Q91YH6_MOUSE;tr|Q8C3L6|Q8C3L6_MOUSE;tr|B0LAC8|B0LAC8_MOUSE;tr|A0A0U1RNU9|A0A0U1RNU9_MOUSE	sp|P62814|VATB2_MOUSE;tr|A0A1S6GWG6|A0A1S6GWG6_MOUSE	sp|P62814|VATB2_MOUSE V-type proton ATPase subunit B, brain isoform OS=Mus musculus OX=10090 GN=Atp6v1b2 PE=1 SV=1;tr|A0A1S6GWG6|A0A1S6GWG6_MOUSE Uncharacterized protein OS=Mus musculus OX=10090 GN=Atp6v1b2 PE=2 SV=1	P62814	Atp6v1b2 Atp6b2 Vat2	V-type proton ATPase subunit B, brain isoform (V-ATPase subunit B 2) (Endomembrane proton pump 58 kDa subunit) (Vacuolar proton pump subunit B 2)	8	14	14	43.8	56.55	150240000	146140000	162840000	132070000	145130000	131270000	0.889487	0.0660722
tr|A2RSS6|A2RSS6_MOUSE;sp|Q64191|ASPG_MOUSE;tr|B7ZNK6|B7ZNK6_MOUSE	tr|A2RSS6|A2RSS6_MOUSE;sp|Q64191|ASPG_MOUSE;tr|B7ZNK6|B7ZNK6_MOUSE	tr|A2RSS6|A2RSS6_MOUSE Aspartylglucosaminidase OS=Mus musculus OX=10090 GN=Aga PE=1 SV=1;sp|Q64191|ASPG_MOUSE N(4)-(beta-N-acetylglucosaminyl)-L-asparaginase OS=Mus musculus OX=10090 GN=Aga PE=1 SV=1;tr|B7ZNK6|B7ZNK6_MOUSE Aga protein OS=Mus musculus OX=10	A2RSS6	Aga mCG_8110	Aspartylglucosaminidase (Aspartylglucosaminidase, isoform CRA_b)	3	5	5	16.2	37.022	23111000	24487000	30897000	29913000	36755000	36576000	1.31529	0.0662386
sp|P43024|CX6A1_MOUSE;tr|Q9DCW5|Q9DCW5_MOUSE	sp|P43024|CX6A1_MOUSE;tr|Q9DCW5|Q9DCW5_MOUSE	sp|P43024|CX6A1_MOUSE Cytochrome c oxidase subunit 6A1, mitochondrial OS=Mus musculus OX=10090 GN=Cox6a1 PE=1 SV=2;tr|Q9DCW5|Q9DCW5_MOUSE Cytochrome c oxidase subunit 6A, mitochondrial OS=Mus musculus OX=10090 GN=Cox6a1 PE=1 SV=1	P43024	Cox6a1 Cox6al	Cytochrome c oxidase subunit 6A1, mitochondrial (Cytochrome c oxidase polypeptide VIa-liver)	2	2	2	40.5	12.352	270240000	267560000	313490000	345030000	415670000	325220000	1.27562	0.0664353
sp|Q5SSZ5|TENS3_MOUSE;tr|Q9DBT6|Q9DBT6_MOUSE;tr|Q7TPM8|Q7TPM8_MOUSE;tr|Q3U0Q9|Q3U0Q9_MOUSE;tr|Q7TSV1|Q7TSV1_MOUSE;tr|A0A2R8VHQ0|A0A2R8VHQ0_MOUSE;sp|Q8CGB6|TNS2_MOUSE;tr|A0A087WRU0|A0A087WRU0_MOUSE;tr|A0A087WQ94|A0A087WQ94_MOUSE;tr|A0A087WQM0|A0A087WQM0_MOUSE;tr|A0A087WQS0|A0A087WQS0_MOUSE;tr|A0A1D5RM59|A0A1D5RM59_MOUSE;tr|E9Q0S6|E9Q0S6_MOUSE	sp|Q5SSZ5|TENS3_MOUSE	sp|Q5SSZ5|TENS3_MOUSE Tensin-3 OS=Mus musculus OX=10090 GN=Tns3 PE=1 SV=1	Q5SSZ5	Tns3 Tens1	Tensin-3 (Tensin-like SH2 domain-containing protein 1)	13	8	8	9.9	155.59	104470000	78225000	83921000	108390000	106060000	119020000	1.25075	0.0667458
sp|Q9ESV0|DDX24_MOUSE;tr|F8WJA0|F8WJA0_MOUSE;tr|Q3U7R4|Q3U7R4_MOUSE;tr|A0A1Y7VKX7|A0A1Y7VKX7_MOUSE;tr|Q3TLR1|Q3TLR1_MOUSE;tr|Q3UYV7|Q3UYV7_MOUSE;tr|A0A1Y7VLU4|A0A1Y7VLU4_MOUSE;tr|Q9CRZ6|Q9CRZ6_MOUSE;tr|A0A1Y7VK75|A0A1Y7VK75_MOUSE;tr|A0A1Y7VMS6|A0A1Y7VMS6_MOUSE	sp|Q9ESV0|DDX24_MOUSE;tr|F8WJA0|F8WJA0_MOUSE;tr|Q3U7R4|Q3U7R4_MOUSE;tr|A0A1Y7VKX7|A0A1Y7VKX7_MOUSE;tr|Q3TLR1|Q3TLR1_MOUSE;tr|Q3UYV7|Q3UYV7_MOUSE	sp|Q9ESV0|DDX24_MOUSE ATP-dependent RNA helicase DDX24 OS=Mus musculus OX=10090 GN=Ddx24 PE=1 SV=2;tr|F8WJA0|F8WJA0_MOUSE ATP-dependent RNA helicase DDX24 OS=Mus musculus OX=10090 GN=Ddx24 PE=1 SV=1;tr|Q3U7R4|Q3U7R4_MOUSE Uncharacterized protein OS=Mus mus	Q9ESV0	Ddx24	ATP-dependent RNA helicase DDX24 (EC 3.6.4.13) (DEAD box protein 24)	10	21	21	33.3	96.428	280630000	283770000	255260000	300600000	308700000	355570000	1.17716	0.0668052
sp|Q9D0L8|MCES_MOUSE;tr|D3Z478|D3Z478_MOUSE;tr|D3YYS7|D3YYS7_MOUSE;tr|D3Z4K1|D3Z4K1_MOUSE	sp|Q9D0L8|MCES_MOUSE;tr|D3Z478|D3Z478_MOUSE;tr|D3YYS7|D3YYS7_MOUSE	sp|Q9D0L8|MCES_MOUSE mRNA cap guanine-N7 methyltransferase OS=Mus musculus OX=10090 GN=Rnmt PE=1 SV=1;tr|D3Z478|D3Z478_MOUSE mRNA cap guanine-N7 methyltransferase (Fragment) OS=Mus musculus OX=10090 GN=Rnmt PE=1 SV=1;tr|D3YYS7|D3YYS7_MOUSE mRNA cap guanine	Q9D0L8	Rnmt Kiaa0398	mRNA cap guanine-N7 methyltransferase (EC 2.1.1.56) (RG7MT1) (mRNA (guanine-N(7)-)-methyltransferase) (mRNA cap methyltransferase)	4	8	8	21.9	53.291	60654000	70961000	68910000	77378000	73524000	74731000	1.12521	0.0668494
sp|Q640M1|UT14A_MOUSE;tr|Q3UYD0|Q3UYD0_MOUSE;tr|Q3UYV5|Q3UYV5_MOUSE;sp|Q6EJB6|UT14B_MOUSE;tr|B2RUE3|B2RUE3_MOUSE;tr|E9Q9S3|E9Q9S3_MOUSE	sp|Q640M1|UT14A_MOUSE;tr|Q3UYD0|Q3UYD0_MOUSE	sp|Q640M1|UT14A_MOUSE U3 small nucleolar RNA-associated protein 14 homolog A OS=Mus musculus OX=10090 GN=Utp14a PE=1 SV=1;tr|Q3UYD0|Q3UYD0_MOUSE Uncharacterized protein OS=Mus musculus OX=10090 GN=Utp14a PE=2 SV=1	Q640M1	Utp14a JsdX Kiaa0266	U3 small nucleolar RNA-associated protein 14 homolog A (Juvenile spermatogonial depletion-like X-linked protein) (Jsd-like X-linked protein)	6	25	25	40.4	87.264	409820000	398900000	368940000	449450000	413340000	471540000	1.13304	0.0669097
sp|Q8JZQ2|AFG32_MOUSE;tr|Q3UDQ7|Q3UDQ7_MOUSE;tr|Q3U7C0|Q3U7C0_MOUSE;tr|Q8R5F1|Q8R5F1_MOUSE;tr|Q9D736|Q9D736_MOUSE	sp|Q8JZQ2|AFG32_MOUSE;tr|Q3UDQ7|Q3UDQ7_MOUSE;tr|Q3U7C0|Q3U7C0_MOUSE	sp|Q8JZQ2|AFG32_MOUSE AFG3-like protein 2 OS=Mus musculus OX=10090 GN=Afg3l2 PE=1 SV=1;tr|Q3UDQ7|Q3UDQ7_MOUSE Uncharacterized protein OS=Mus musculus OX=10090 GN=Afg3l2 PE=2 SV=1;tr|Q3U7C0|Q3U7C0_MOUSE Uncharacterized protein OS=Mus musculus OX=10090 GN=Af	Q8JZQ2	Afg3l2	AFG3-like protein 2 (EC 3.4.24.-)	5	29	26	39.8	89.518	441210000	407420000	398640000	456650000	440530000	454320000	1.08357	0.0670246
sp|O88587|COMT_MOUSE;tr|D3Z227|D3Z227_MOUSE	sp|O88587|COMT_MOUSE;tr|D3Z227|D3Z227_MOUSE	sp|O88587|COMT_MOUSE Catechol O-methyltransferase OS=Mus musculus OX=10090 GN=Comt PE=1 SV=2;tr|D3Z227|D3Z227_MOUSE Catechol O-methyltransferase (Fragment) OS=Mus musculus OX=10090 GN=Comt PE=1 SV=1	O88587	Comt Comt1	Catechol O-methyltransferase (EC 2.1.1.6)	2	12	12	55.1	29.486	203520000	240540000	234000000	191500000	204060000	191520000	0.865823	0.0670539
sp|Q8CIM3|D2HDH_MOUSE;tr|E9QN44|E9QN44_MOUSE;tr|A0A087WR78|A0A087WR78_MOUSE	sp|Q8CIM3|D2HDH_MOUSE;tr|E9QN44|E9QN44_MOUSE	sp|Q8CIM3|D2HDH_MOUSE D-2-hydroxyglutarate dehydrogenase, mitochondrial OS=Mus musculus OX=10090 GN=D2hgdh PE=1 SV=3;tr|E9QN44|E9QN44_MOUSE D-2-hydroxyglutarate dehydrogenase, mitochondrial OS=Mus musculus OX=10090 GN=D2hgdh PE=1 SV=1	Q8CIM3	D2hgdh	D-2-hydroxyglutarate dehydrogenase, mitochondrial (EC 1.1.99.-)	3	6	6	19.3	58.575	42032000	38069000	39963000	32155000	29496000	37920000	0.829316	0.0670682
tr|Q3TPU5|Q3TPU5_MOUSE;sp|O70378|EMC8_MOUSE;tr|Q8C988|Q8C988_MOUSE;tr|Q3TTC9|Q3TTC9_MOUSE;tr|M0QWY0|M0QWY0_MOUSE;tr|M0QWP2|M0QWP2_MOUSE;tr|M0QWI7|M0QWI7_MOUSE;tr|M0QWC9|M0QWC9_MOUSE;tr|M0QWS0|M0QWS0_MOUSE;tr|M0QWE2|M0QWE2_MOUSE	tr|Q3TPU5|Q3TPU5_MOUSE;sp|O70378|EMC8_MOUSE;tr|Q8C988|Q8C988_MOUSE;tr|Q3TTC9|Q3TTC9_MOUSE;tr|M0QWY0|M0QWY0_MOUSE;tr|M0QWP2|M0QWP2_MOUSE	tr|Q3TPU5|Q3TPU5_MOUSE Uncharacterized protein OS=Mus musculus OX=10090 GN=Emc8 PE=1 SV=1;sp|O70378|EMC8_MOUSE ER membrane protein complex subunit 8 OS=Mus musculus OX=10090 GN=Emc8 PE=1 SV=1;tr|Q8C988|Q8C988_MOUSE Uncharacterized protein OS=Mus musculus O	Q3TPU5	Emc8 Cox4nb	MPN domain-containing protein	10	10	10	66.2	23.348	373530000	425630000	363050000	347920000	329530000	334070000	0.870342	0.0670701
sp|Q9D0K2|SCOT1_MOUSE;tr|Q3UJQ9|Q3UJQ9_MOUSE;tr|Q3UK61|Q3UK61_MOUSE;tr|Q3U9P7|Q3U9P7_MOUSE;tr|Q9CRF4|Q9CRF4_MOUSE;tr|A1E285|A1E285_MOUSE	sp|Q9D0K2|SCOT1_MOUSE;tr|Q3UJQ9|Q3UJQ9_MOUSE;tr|Q3UK61|Q3UK61_MOUSE;tr|Q3U9P7|Q3U9P7_MOUSE;tr|Q9CRF4|Q9CRF4_MOUSE	sp|Q9D0K2|SCOT1_MOUSE Succinyl-CoA:3-ketoacid coenzyme A transferase 1, mitochondrial OS=Mus musculus OX=10090 GN=Oxct1 PE=1 SV=1;tr|Q3UJQ9|Q3UJQ9_MOUSE Succinyl-CoA:3-ketoacid-coenzyme A transferase OS=Mus musculus OX=10090 GN=Oxct1 PE=1 SV=1;tr|Q3UK61|Q3	Q9D0K2	Oxct1 Oxct Scot	Succinyl-CoA:3-ketoacid coenzyme A transferase 1, mitochondrial (EC 2.8.3.5) (3-oxoacid CoA-transferase 1) (Somatic-type succinyl-CoA:3-oxoacid CoA-transferase) (SCOT-s)	6	19	19	53.8	55.988	950550000	948150000	854580000	820040000	841190000	847730000	0.911262	0.067358
sp|Q91WM1|STRBP_MOUSE;tr|Q8C5B7|Q8C5B7_MOUSE;tr|A2BH82|A2BH82_MOUSE;tr|Q9CVW0|Q9CVW0_MOUSE;tr|A2BH83|A2BH83_MOUSE	sp|Q91WM1|STRBP_MOUSE;tr|Q8C5B7|Q8C5B7_MOUSE	sp|Q91WM1|STRBP_MOUSE Spermatid perinuclear RNA-binding protein OS=Mus musculus OX=10090 GN=Strbp PE=1 SV=1;tr|Q8C5B7|Q8C5B7_MOUSE Uncharacterized protein OS=Mus musculus OX=10090 GN=Strbp PE=2 SV=1	Q91WM1	Strbp Spnr	Spermatid perinuclear RNA-binding protein	5	16	13	32	73.704	91937000	87286000	97782000	76294000	85883000	83523000	0.886988	0.0673746
tr|Q6NXX6|Q6NXX6_MOUSE;tr|K3W4T3|K3W4T3_MOUSE;sp|Q9Z1G4|VPP1_MOUSE;tr|Q3TXT5|Q3TXT5_MOUSE;tr|Q3TY98|Q3TY98_MOUSE;tr|Q99M55|Q99M55_MOUSE;tr|A2A599|A2A599_MOUSE;tr|Q3TLR5|Q3TLR5_MOUSE	tr|Q6NXX6|Q6NXX6_MOUSE;tr|K3W4T3|K3W4T3_MOUSE;sp|Q9Z1G4|VPP1_MOUSE;tr|Q3TXT5|Q3TXT5_MOUSE;tr|Q3TY98|Q3TY98_MOUSE	tr|Q6NXX6|Q6NXX6_MOUSE V-type proton ATPase subunit a OS=Mus musculus OX=10090 GN=Atp6v0a1 PE=2 SV=1;tr|K3W4T3|K3W4T3_MOUSE V-type proton ATPase subunit a OS=Mus musculus OX=10090 GN=Atp6v0a1 PE=1 SV=1;sp|Q9Z1G4|VPP1_MOUSE V-type proton ATPase 116 kDa subu	Q6NXX6	Atp6v0a1	V-type proton ATPase subunit a	8	9	8	14.4	95.64	118910000	85041000	91374000	78045000	64277000	69739000	0.71806	0.0673818
tr|Q8C3V7|Q8C3V7_MOUSE;sp|P22315|HEMH_MOUSE;tr|Q544X6|Q544X6_MOUSE;tr|Q4QRK2|Q4QRK2_MOUSE;tr|Q3UC49|Q3UC49_MOUSE;tr|Q91W09|Q91W09_MOUSE	tr|Q8C3V7|Q8C3V7_MOUSE;sp|P22315|HEMH_MOUSE;tr|Q544X6|Q544X6_MOUSE;tr|Q4QRK2|Q4QRK2_MOUSE;tr|Q3UC49|Q3UC49_MOUSE;tr|Q91W09|Q91W09_MOUSE	tr|Q8C3V7|Q8C3V7_MOUSE Ferrochelatase OS=Mus musculus OX=10090 GN=Fech PE=2 SV=1;sp|P22315|HEMH_MOUSE Ferrochelatase, mitochondrial OS=Mus musculus OX=10090 GN=Fech PE=1 SV=2;tr|Q544X6|Q544X6_MOUSE Ferrochelatase OS=Mus musculus OX=10090 GN=Fech PE=1 SV=1;	Q8C3V7	Fech	Ferrochelatase (EC 4.99.1.1)	6	9	9	32.5	46.746	109360000	94472000	114790000	84900000	93729000	90674000	0.845212	0.06748
tr|Q3TCZ2|Q3TCZ2_MOUSE;tr|Q3UJY1|Q3UJY1_MOUSE;sp|Q9JIM1|S29A1_MOUSE;tr|E9PXM6|E9PXM6_MOUSE;tr|A8VP81|A8VP81_MOUSE;tr|E9PWY7|E9PWY7_MOUSE;tr|E9Q221|E9Q221_MOUSE;tr|E9Q503|E9Q503_MOUSE;tr|E9Q3D1|E9Q3D1_MOUSE;tr|E9PWD6|E9PWD6_MOUSE;tr|E9PZV0|E9PZV0_MOUSE;tr|E9PVH9|E9PVH9_MOUSE;tr|E9PXQ6|E9PXQ6_MOUSE	tr|Q3TCZ2|Q3TCZ2_MOUSE;tr|Q3UJY1|Q3UJY1_MOUSE;sp|Q9JIM1|S29A1_MOUSE;tr|E9PXM6|E9PXM6_MOUSE;tr|A8VP81|A8VP81_MOUSE	tr|Q3TCZ2|Q3TCZ2_MOUSE Solute carrier family 29 (Nucleoside transporters), member 1, isoform CRA_a OS=Mus musculus OX=10090 GN=Slc29a1 PE=2 SV=1;tr|Q3UJY1|Q3UJY1_MOUSE Uncharacterized protein OS=Mus musculus OX=10090 GN=Slc29a1 PE=2 SV=1;sp|Q9JIM1|S29A1_MO	Q3TCZ2	Slc29a1 mCG_18248	Solute carrier family 29 (Nucleoside transporters), member 1, isoform CRA_a	13	6	6	14.6	50.076	133530000	122800000	113210000	113190000	103770000	100310000	0.858554	0.0680232
tr|Q3UQM5|Q3UQM5_MOUSE;tr|Q569U9|Q569U9_MOUSE;sp|Q9ERI6|RDH14_MOUSE	tr|Q3UQM5|Q3UQM5_MOUSE;tr|Q569U9|Q569U9_MOUSE;sp|Q9ERI6|RDH14_MOUSE	tr|Q3UQM5|Q3UQM5_MOUSE Uncharacterized protein (Fragment) OS=Mus musculus OX=10090 GN=Rdh14 PE=2 SV=1;tr|Q569U9|Q569U9_MOUSE Retinol dehydrogenase 14 (All-trans and 9-cis) OS=Mus musculus OX=10090 GN=Rdh14 PE=2 SV=1;sp|Q9ERI6|RDH14_MOUSE Retinol dehydrogen	Q3UQM5	Rdh14	Uncharacterized protein (Fragment)	3	4	4	24.9	28.146	26780000	21226000	21029000	20060000	15260000	15682000	0.738785	0.0687247
tr|Q3U574|Q3U574_MOUSE;sp|Q9R1X4|TIM_MOUSE;tr|H7BX89|H7BX89_MOUSE	tr|Q3U574|Q3U574_MOUSE;sp|Q9R1X4|TIM_MOUSE;tr|H7BX89|H7BX89_MOUSE	tr|Q3U574|Q3U574_MOUSE Uncharacterized protein OS=Mus musculus OX=10090 GN=Timeless PE=2 SV=1;sp|Q9R1X4|TIM_MOUSE Protein timeless homolog OS=Mus musculus OX=10090 GN=Timeless PE=1 SV=3;tr|H7BX89|H7BX89_MOUSE Protein timeless homolog (Fragment) OS=Mus musc	Q3U574	Timeless	Uncharacterized protein	3	3	3	4	137.43	7239800	8147000	7107500	8407300	8772400	8116900	1.12458	0.0687355
tr|Q545X5|Q545X5_MOUSE;tr|Q3U2D1|Q3U2D1_MOUSE;sp|P35456|UPAR_MOUSE;tr|A0A0U1RNN0|A0A0U1RNN0_MOUSE	tr|Q545X5|Q545X5_MOUSE;tr|Q3U2D1|Q3U2D1_MOUSE;sp|P35456|UPAR_MOUSE;tr|A0A0U1RNN0|A0A0U1RNN0_MOUSE	tr|Q545X5|Q545X5_MOUSE Plasminogen activator, urokinase receptor, isoform CRA_b OS=Mus musculus OX=10090 GN=Plaur PE=2 SV=1;tr|Q3U2D1|Q3U2D1_MOUSE Uncharacterized protein OS=Mus musculus OX=10090 GN=Plaur PE=2 SV=1;sp|P35456|UPAR_MOUSE Urokinase plasminoge	Q545X5	Plaur mCG_7264	Plasminogen activator, urokinase receptor, isoform CRA_b	4	6	6	19.6	35.428	263760000	240360000	203700000	197190000	184020000	193820000	0.812396	0.0689317
sp|Q14AX6|CDK12_MOUSE;tr|Q3TNY6|Q3TNY6_MOUSE	sp|Q14AX6|CDK12_MOUSE	sp|Q14AX6|CDK12_MOUSE Cyclin-dependent kinase 12 OS=Mus musculus OX=10090 GN=Cdk12 PE=1 SV=2	Q14AX6	Cdk12 Crk7 Crkrs Kiaa0904	Cyclin-dependent kinase 12 (EC 2.7.11.22) (EC 2.7.11.23) (Cdc2-related kinase, arginine/serine-rich) (CrkRS) (Cell division cycle 2-related protein kinase 7) (CDC2-related protein kinase 7) (Cell division protein kinase 12)	2	6	5	6.5	163.68	24120000	22875000	21349000	31119000	27761000	24602000	1.2215	0.0691425
sp|Q9CXK8|NIP7_MOUSE;tr|E9Q109|E9Q109_MOUSE	sp|Q9CXK8|NIP7_MOUSE;tr|E9Q109|E9Q109_MOUSE	sp|Q9CXK8|NIP7_MOUSE 60S ribosome subunit biogenesis protein NIP7 homolog OS=Mus musculus OX=10090 GN=Nip7 PE=1 SV=1;tr|E9Q109|E9Q109_MOUSE 60S ribosome subunit biogenesis protein NIP7 homolog OS=Mus musculus OX=10090 GN=Nip7 PE=1 SV=1	Q9CXK8	Nip7	60S ribosome subunit biogenesis protein NIP7 homolog (PEachy) (kDa93)	2	11	11	77.8	20.451	219450000	214920000	210130000	223080000	237610000	255060000	1.11055	0.0691923
tr|A1L3B6|A1L3B6_MOUSE;sp|Q9D7Z3|NOL7_MOUSE;tr|A0A1Y7VMS4|A0A1Y7VMS4_MOUSE	tr|A1L3B6|A1L3B6_MOUSE;sp|Q9D7Z3|NOL7_MOUSE	tr|A1L3B6|A1L3B6_MOUSE Nol7 protein OS=Mus musculus OX=10090 GN=Nol7 PE=2 SV=1;sp|Q9D7Z3|NOL7_MOUSE Nucleolar protein 7 OS=Mus musculus OX=10090 GN=Nol7 PE=1 SV=1	A1L3B6	Nol7 mCG_19432	Nol7 protein (Nucleolar protein 7) (Nucleolar protein 7, isoform CRA_a)	3	8	8	25.2	28.97	199150000	165350000	169890000	220210000	205580000	199350000	1.16982	0.0691974
sp|Q91YT7|YTHD2_MOUSE;tr|Q3UNH5|Q3UNH5_MOUSE;tr|E9PW90|E9PW90_MOUSE;tr|F6Y6H7|F6Y6H7_MOUSE	sp|Q91YT7|YTHD2_MOUSE;tr|Q3UNH5|Q3UNH5_MOUSE	sp|Q91YT7|YTHD2_MOUSE YTH domain-containing family protein 2 OS=Mus musculus OX=10090 GN=Ythdf2 PE=1 SV=1;tr|Q3UNH5|Q3UNH5_MOUSE Uncharacterized protein OS=Mus musculus OX=10090 GN=Ythdf2 PE=2 SV=1	Q91YT7	Ythdf2	YTH domain-containing family protein 2	4	12	7	24.2	62.279	279530000	264770000	259340000	255060000	247550000	253370000	0.940695	0.0693728
tr|Q3UKS5|Q3UKS5_MOUSE;tr|Q640L6|Q640L6_MOUSE;tr|Q8CGB4|Q8CGB4_MOUSE;sp|P16951|ATF2_MOUSE;tr|G3UXC3|G3UXC3_MOUSE;tr|Q8CBR9|Q8CBR9_MOUSE;tr|Q3US39|Q3US39_MOUSE;tr|A2AQE9|A2AQE9_MOUSE;tr|Q8BQY2|Q8BQY2_MOUSE;tr|A2AQF0|A2AQF0_MOUSE;tr|Q8BN75|Q8BN75_MOUSE;tr|P70299|P70299_MOUSE;tr|Q68FE3|Q68FE3_MOUSE;tr|Q543G2|Q543G2_MOUSE;tr|F6Z2B2|F6Z2B2_MOUSE	tr|Q3UKS5|Q3UKS5_MOUSE;tr|Q640L6|Q640L6_MOUSE;tr|Q8CGB4|Q8CGB4_MOUSE;sp|P16951|ATF2_MOUSE;tr|G3UXC3|G3UXC3_MOUSE;tr|Q8CBR9|Q8CBR9_MOUSE;tr|Q3US39|Q3US39_MOUSE;tr|A2AQE9|A2AQE9_MOUSE;tr|Q8BQY2|Q8BQY2_MOUSE;tr|A2AQF0|A2AQF0_MOUSE;tr|Q8BN75|Q8BN75_MOUSE;tr|P70299|P70299_MOUSE;tr|Q68FE3|Q68FE3_MOUSE;tr|Q543G2|Q543G2_MOUSE	tr|Q3UKS5|Q3UKS5_MOUSE Uncharacterized protein OS=Mus musculus OX=10090 GN=Atf2 PE=2 SV=1;tr|Q640L6|Q640L6_MOUSE Atf2 protein OS=Mus musculus OX=10090 GN=Atf2 PE=2 SV=1;tr|Q8CGB4|Q8CGB4_MOUSE Atf2 protein OS=Mus musculus OX=10090 GN=Atf2 PE=2 SV=1;sp|P1695	Q3UKS5	Atf2	Uncharacterized protein	15	4	3	12.2	40.892	20199000	19247000	20856000	23737000	21750000	NaN	1.13148	0.0697154
tr|Q561N5|Q561N5_MOUSE;tr|F6YVP7|F6YVP7_MOUSE;tr|A0A1Y7VKY1|A0A1Y7VKY1_MOUSE;sp|P62270|RS18_MOUSE;tr|Q3TW65|Q3TW65_MOUSE;tr|S4R1N6|S4R1N6_MOUSE;tr|A0A3Q4EGP3|A0A3Q4EGP3_MOUSE	tr|Q561N5|Q561N5_MOUSE;tr|F6YVP7|F6YVP7_MOUSE;tr|A0A1Y7VKY1|A0A1Y7VKY1_MOUSE;sp|P62270|RS18_MOUSE;tr|Q3TW65|Q3TW65_MOUSE;tr|S4R1N6|S4R1N6_MOUSE	tr|Q561N5|Q561N5_MOUSE MCG23000, isoform CRA_b OS=Mus musculus OX=10090 GN=Rps18 PE=2 SV=1;tr|F6YVP7|F6YVP7_MOUSE Predicted gene 10260 OS=Mus musculus OX=10090 GN=Gm10260 PE=3 SV=2;tr|A0A1Y7VKY1|A0A1Y7VKY1_MOUSE MCG116671 OS=Mus musculus OX=10090 GN=Gm1136	Q561N5	Rps18 mCG_23000	MCG23000, isoform CRA_b (Ribosomal protein S18)	7	10	10	48.7	17.718	2226400000	1989400000	1957900000	2366600000	2193400000	2443200000	1.13436	0.0697394
tr|Q91WX5|Q91WX5_MOUSE;sp|O08734|BAK_MOUSE;tr|F7CUQ1|F7CUQ1_MOUSE	tr|Q91WX5|Q91WX5_MOUSE;sp|O08734|BAK_MOUSE;tr|F7CUQ1|F7CUQ1_MOUSE	tr|Q91WX5|Q91WX5_MOUSE Bak1 protein OS=Mus musculus OX=10090 GN=Bak1 PE=1 SV=1;sp|O08734|BAK_MOUSE Bcl-2 homologous antagonist/killer OS=Mus musculus OX=10090 GN=Bak1 PE=1 SV=3;tr|F7CUQ1|F7CUQ1_MOUSE Bcl-2 homologous antagonist/killer (Fragment) OS=Mus mus	Q91WX5	Bak1	Bak1 protein (Bcl-2 homologous antagonist/killer) (N-BAK1)	3	5	5	66.2	16.402	95954000	101600000	95950000	95120000	87729000	88316000	0.923889	0.0697699
sp|Q91VL8|TE2IP_MOUSE;tr|Q8BPK1|Q8BPK1_MOUSE	sp|Q91VL8|TE2IP_MOUSE;tr|Q8BPK1|Q8BPK1_MOUSE	sp|Q91VL8|TE2IP_MOUSE Telomeric repeat-binding factor 2-interacting protein 1 OS=Mus musculus OX=10090 GN=Terf2ip PE=1 SV=1;tr|Q8BPK1|Q8BPK1_MOUSE Uncharacterized protein OS=Mus musculus OX=10090 GN=Terf2ip PE=2 SV=1	Q91VL8	Terf2ip Rap1 MNCb-0448 MNCb-0628	Telomeric repeat-binding factor 2-interacting protein 1 (TERF2-interacting telomeric protein 1) (TRF2-interacting telomeric protein 1) (Repressor/activator protein 1 homolog) (RAP1 homolog)	2	5	5	29.8	43.353	20027000	18170000	22344000	22882000	25411000	23001000	1.17762	0.070279
tr|Q3UHW2|Q3UHW2_MOUSE;tr|Q3TT11|Q3TT11_MOUSE;sp|P51660|DHB4_MOUSE	tr|Q3UHW2|Q3UHW2_MOUSE;tr|Q3TT11|Q3TT11_MOUSE;sp|P51660|DHB4_MOUSE	tr|Q3UHW2|Q3UHW2_MOUSE Uncharacterized protein OS=Mus musculus OX=10090 GN=Hsd17b4 PE=2 SV=1;tr|Q3TT11|Q3TT11_MOUSE Uncharacterized protein OS=Mus musculus OX=10090 GN=Hsd17b4 PE=2 SV=1;sp|P51660|DHB4_MOUSE Peroxisomal multifunctional enzyme type 2 OS=Mus	Q3UHW2	Hsd17b4	Uncharacterized protein	3	27	27	49.9	79.423	1468200000	1411300000	1334800000	1321800000	1301200000	1302900000	0.931566	0.0702997
tr|A0A0A0MQM6|A0A0A0MQM6_MOUSE;tr|I1E4X2|I1E4X2_MOUSE;tr|A0A0A0MQE0|A0A0A0MQE0_MOUSE;tr|E9Q6Z8|E9Q6Z8_MOUSE;sp|P25425|PO2F1_MOUSE;tr|F8VQL7|F8VQL7_MOUSE;tr|A0A0R4J1Z4|A0A0R4J1Z4_MOUSE;tr|P70260|P70260_MOUSE;tr|Q3U5D1|Q3U5D1_MOUSE;tr|H3BJT4|H3BJT4_MOUSE;sp|P31362|PO2F3_MOUSE;sp|Q00196|PO2F2_MOUSE;tr|H3BKB7|H3BKB7_MOUSE;tr|Q7TSC9|Q7TSC9_MOUSE;tr|O89067|O89067_MOUSE	tr|A0A0A0MQM6|A0A0A0MQM6_MOUSE;tr|I1E4X2|I1E4X2_MOUSE;tr|A0A0A0MQE0|A0A0A0MQE0_MOUSE;tr|E9Q6Z8|E9Q6Z8_MOUSE;sp|P25425|PO2F1_MOUSE;tr|F8VQL7|F8VQL7_MOUSE;tr|A0A0R4J1Z4|A0A0R4J1Z4_MOUSE;tr|P70260|P70260_MOUSE;tr|Q3U5D1|Q3U5D1_MOUSE;tr|H3BJT4|H3BJT4_MOUSE;sp|P31362|PO2F3_MOUSE;sp|Q00196|PO2F2_MOUSE;tr|H3BKB7|H3BKB7_MOUSE;tr|Q7TSC9|Q7TSC9_MOUSE	tr|A0A0A0MQM6|A0A0A0MQM6_MOUSE POU domain protein (Fragment) OS=Mus musculus OX=10090 GN=Pou2f1 PE=1 SV=1;tr|I1E4X2|I1E4X2_MOUSE POU domain protein OS=Mus musculus OX=10090 GN=Pou2f1 PE=1 SV=1;tr|A0A0A0MQE0|A0A0A0MQE0_MOUSE POU domain protein OS=Mus muscul	A0A0A0MQM6	Pou2f1	POU domain protein (Fragment)	15	3	3	6.9	61.017	10947000	NaN	14271000	9783000	7942400	7974700	0.679412	0.0703818
sp|Q9CQN7|RM41_MOUSE	sp|Q9CQN7|RM41_MOUSE	sp|Q9CQN7|RM41_MOUSE 39S ribosomal protein L41, mitochondrial OS=Mus musculus OX=10090 GN=Mrpl41 PE=1 SV=1	Q9CQN7	Mrpl41	39S ribosomal protein L41, mitochondrial (L41mt) (MRP-L41)	1	5	5	42.2	15.261	98209000	98135000	96177000	102230000	104240000	114570000	1.09749	0.0704435
sp|Q3TJD7|PDLI7_MOUSE;tr|Q8BVJ7|Q8BVJ7_MOUSE;tr|B8JJB2|B8JJB2_MOUSE;tr|B8JJB3|B8JJB3_MOUSE;tr|B8JJB1|B8JJB1_MOUSE	sp|Q3TJD7|PDLI7_MOUSE	sp|Q3TJD7|PDLI7_MOUSE PDZ and LIM domain protein 7 OS=Mus musculus OX=10090 GN=Pdlim7 PE=1 SV=1	Q3TJD7	Pdlim7 Enigma	PDZ and LIM domain protein 7 (LIM mineralization protein) (LMP) (Protein enigma)	5	18	18	58.4	50.118	409140000	453030000	429330000	386900000	371100000	409480000	0.903972	0.0705056
tr|E0CYI9|E0CYI9_MOUSE;tr|E9PWI6|E9PWI6_MOUSE;sp|Q8CHG3|GCC2_MOUSE;tr|B2RSU7|B2RSU7_MOUSE;tr|Q3UFV3|Q3UFV3_MOUSE;tr|F6UT01|F6UT01_MOUSE;tr|Q6P0A4|Q6P0A4_MOUSE	tr|E0CYI9|E0CYI9_MOUSE;tr|E9PWI6|E9PWI6_MOUSE;sp|Q8CHG3|GCC2_MOUSE;tr|B2RSU7|B2RSU7_MOUSE;tr|Q3UFV3|Q3UFV3_MOUSE	tr|E0CYI9|E0CYI9_MOUSE GRIP and coiled-coil domain-containing protein 2 OS=Mus musculus OX=10090 GN=Gcc2 PE=1 SV=1;tr|E9PWI6|E9PWI6_MOUSE GRIP and coiled-coil domain-containing protein 2 OS=Mus musculus OX=10090 GN=Gcc2 PE=1 SV=1;sp|Q8CHG3|GCC2_MOUSE GRIP	E0CYI9	Gcc2	GRIP and coiled-coil domain-containing protein 2	7	4	4	3.1	183.01	NaN	12758000	11740000	15617000	15682000	13546000	1.22037	0.0707779
sp|Q91WS0|CISD1_MOUSE	sp|Q91WS0|CISD1_MOUSE	sp|Q91WS0|CISD1_MOUSE CDGSH iron-sulfur domain-containing protein 1 OS=Mus musculus OX=10090 GN=Cisd1 PE=1 SV=1	Q91WS0	Cisd1 D10Ertd214e Zcd1	CDGSH iron-sulfur domain-containing protein 1 (MitoNEET)	1	5	5	48.1	12.097	236030000	189830000	187790000	166060000	151560000	172180000	0.798175	0.0709503
sp|Q62425|NDUA4_MOUSE;tr|A0A0N4SVQ1|A0A0N4SVQ1_MOUSE	sp|Q62425|NDUA4_MOUSE;tr|A0A0N4SVQ1|A0A0N4SVQ1_MOUSE	sp|Q62425|NDUA4_MOUSE Cytochrome c oxidase subunit NDUFA4 OS=Mus musculus OX=10090 GN=Ndufa4 PE=1 SV=2;tr|A0A0N4SVQ1|A0A0N4SVQ1_MOUSE Cytochrome c oxidase subunit NDUFA4 OS=Mus musculus OX=10090 GN=Ndufa4 PE=1 SV=1	Q62425	Ndufa4	Cytochrome c oxidase subunit NDUFA4	2	6	6	56.1	9.3267	1003500000	979260000	867740000	837730000	847840000	856800000	0.891903	0.0715213
sp|Q9D4H8|CUL2_MOUSE;tr|Q571A2|Q571A2_MOUSE;tr|E0CYT5|E0CYT5_MOUSE;tr|A0A3Q4EBZ1|A0A3Q4EBZ1_MOUSE	sp|Q9D4H8|CUL2_MOUSE;tr|Q571A2|Q571A2_MOUSE;tr|E0CYT5|E0CYT5_MOUSE	sp|Q9D4H8|CUL2_MOUSE Cullin-2 OS=Mus musculus OX=10090 GN=Cul2 PE=1 SV=2;tr|Q571A2|Q571A2_MOUSE MKIAA4106 protein (Fragment) OS=Mus musculus OX=10090 GN=Cul2 PE=2 SV=1;tr|E0CYT5|E0CYT5_MOUSE Cullin-2 (Fragment) OS=Mus musculus OX=10090 GN=Cul2 PE=1 SV=1	Q9D4H8	Cul2	Cullin-2 (CUL-2)	4	8	8	13.3	86.876	30613000	34538000	46649000	48606000	47617000	56967000	1.37021	0.0715417
sp|Q9WVC3|CAV2_MOUSE;tr|Q924U3|Q924U3_MOUSE;tr|Q924U4|Q924U4_MOUSE;tr|D3Z147|D3Z147_MOUSE	sp|Q9WVC3|CAV2_MOUSE;tr|Q924U3|Q924U3_MOUSE;tr|Q924U4|Q924U4_MOUSE;tr|D3Z147|D3Z147_MOUSE	sp|Q9WVC3|CAV2_MOUSE Caveolin-2 OS=Mus musculus OX=10090 GN=Cav2 PE=1 SV=1;tr|Q924U3|Q924U3_MOUSE Caveolin (Fragment) OS=Mus musculus OX=10090 PE=3 SV=1;tr|Q924U4|Q924U4_MOUSE Caveolin OS=Mus musculus OX=10090 GN=Cav2 PE=1 SV=1;tr|D3Z147|D3Z147_MOUSE Caveo	Q9WVC3	Cav2	Caveolin-2	4	3	3	34	18.227	13557000	15139000	15258000	19385000	15832000	17248000	1.19363	0.0722556
sp|Q8CIW5|PEO1_MOUSE;tr|Q3V303|Q3V303_MOUSE;tr|Q80WJ5|Q80WJ5_MOUSE	sp|Q8CIW5|PEO1_MOUSE	sp|Q8CIW5|PEO1_MOUSE Twinkle protein, mitochondrial OS=Mus musculus OX=10090 GN=Twnk PE=2 SV=1	Q8CIW5	Twnk Peo1	Twinkle protein, mitochondrial (EC 3.6.4.12) (Progressive external ophthalmoplegia 1 protein homolog) (T7 gp4-like protein with intramitochondrial nucleoid localization) (T7-like mitochondrial DNA helicase) (Twinkle mtDNA helicase)	3	5	5	11.1	76.992	12489000	13131000	12057000	14905000	15077000	13011000	1.14109	0.07263
sp|Q9CQF0|RM11_MOUSE	sp|Q9CQF0|RM11_MOUSE	sp|Q9CQF0|RM11_MOUSE 39S ribosomal protein L11, mitochondrial OS=Mus musculus OX=10090 GN=Mrpl11 PE=1 SV=1	Q9CQF0	Mrpl11	39S ribosomal protein L11, mitochondrial (L11mt) (MRP-L11)	1	9	9	55.2	20.68	150560000	132030000	126400000	151380000	165330000	190060000	1.23908	0.0726452
sp|Q9Z210|PX11B_MOUSE;tr|E9PXK7|E9PXK7_MOUSE;tr|D6RFQ2|D6RFQ2_MOUSE;tr|D6RFR1|D6RFR1_MOUSE	sp|Q9Z210|PX11B_MOUSE;tr|E9PXK7|E9PXK7_MOUSE;tr|D6RFQ2|D6RFQ2_MOUSE	sp|Q9Z210|PX11B_MOUSE Peroxisomal membrane protein 11B OS=Mus musculus OX=10090 GN=Pex11b PE=1 SV=1;tr|E9PXK7|E9PXK7_MOUSE Peroxisomal membrane protein 11B OS=Mus musculus OX=10090 GN=Pex11b PE=1 SV=1;tr|D6RFQ2|D6RFQ2_MOUSE Predicted gene 42957 OS=Mus musc	Q9Z210	Pex11b	Peroxisomal membrane protein 11B (Peroxin-11B) (Peroxisomal biogenesis factor 11B) (Protein PEX11 homolog beta) (PEX11-beta)	4	5	5	20.1	28.709	43101000	39764000	38824000	31663000	38049000	35528000	0.864828	0.0727478
sp|Q91WC0|SETD3_MOUSE;tr|F2Z420|F2Z420_MOUSE;tr|F2Z438|F2Z438_MOUSE;tr|D6RCY6|D6RCY6_MOUSE	sp|Q91WC0|SETD3_MOUSE;tr|F2Z420|F2Z420_MOUSE	sp|Q91WC0|SETD3_MOUSE Actin-histidine N-methyltransferase OS=Mus musculus OX=10090 GN=Setd3 PE=1 SV=1;tr|F2Z420|F2Z420_MOUSE Actin-histidine N-methyltransferase OS=Mus musculus OX=10090 GN=Setd3 PE=1 SV=1	Q91WC0	Setd3 D12Ertd771e	Actin-histidine N-methyltransferase (EC 2.1.1.85) (Endothelial differentiation inhibitory protein D10) (SET domain-containing protein 3)	4	11	11	21.9	67.175	79047000	67489000	77646000	61980000	66512000	66914000	0.87164	0.0730904
tr|Z4YL78|Z4YL78_MOUSE;tr|A0A0R4J0K2|A0A0R4J0K2_MOUSE;tr|K3W4R5|K3W4R5_MOUSE;sp|A2AGT5|CKAP5_MOUSE;tr|Q80U79|Q80U79_MOUSE;tr|Q6PB55|Q6PB55_MOUSE;tr|Q8K250|Q8K250_MOUSE;tr|Q4V782|Q4V782_MOUSE	tr|Z4YL78|Z4YL78_MOUSE;tr|A0A0R4J0K2|A0A0R4J0K2_MOUSE;tr|K3W4R5|K3W4R5_MOUSE;sp|A2AGT5|CKAP5_MOUSE;tr|Q80U79|Q80U79_MOUSE	tr|Z4YL78|Z4YL78_MOUSE Cytoskeleton-associated protein 5 OS=Mus musculus OX=10090 GN=Ckap5 PE=1 SV=1;tr|A0A0R4J0K2|A0A0R4J0K2_MOUSE Cytoskeleton-associated protein 5 OS=Mus musculus OX=10090 GN=Ckap5 PE=1 SV=1;tr|K3W4R5|K3W4R5_MOUSE Cytoskeleton-associated	Z4YL78	Ckap5	Cytoskeleton-associated protein 5	8	54	54	37	218.71	555680000	619660000	543000000	506770000	530430000	488180000	0.887706	0.0735561
sp|Q9Z2I9|SUCB1_MOUSE;tr|Q3UCC6|Q3UCC6_MOUSE;tr|Q3U6C7|Q3U6C7_MOUSE;tr|Q05BC6|Q05BC6_MOUSE;tr|Q9CTE2|Q9CTE2_MOUSE	sp|Q9Z2I9|SUCB1_MOUSE;tr|Q3UCC6|Q3UCC6_MOUSE;tr|Q3U6C7|Q3U6C7_MOUSE	sp|Q9Z2I9|SUCB1_MOUSE Succinate--CoA ligase [ADP-forming] subunit beta, mitochondrial OS=Mus musculus OX=10090 GN=Sucla2 PE=1 SV=2;tr|Q3UCC6|Q3UCC6_MOUSE Succinate-CoA ligase subunit beta (Fragment) OS=Mus musculus OX=10090 GN=Sucla2 PE=2 SV=1;tr|Q3U6C7|Q3	Q9Z2I9	Sucla2	Succinate--CoA ligase [ADP-forming] subunit beta, mitochondrial (EC 6.2.1.5) (ATP-specific succinyl-CoA synthetase subunit beta) (A-SCS) (Succinyl-CoA synthetase beta-A chain) (SCS-betaA)	5	21	21	49.7	50.113	960430000	932620000	918390000	919010000	879780000	862540000	0.946607	0.073668
tr|A0A140LHU9|A0A140LHU9_MOUSE;tr|A0A140LI54|A0A140LI54_MOUSE;sp|Q3TRM4|PLPL6_MOUSE;tr|A0A140LJI6|A0A140LJI6_MOUSE;tr|A0A140LHJ7|A0A140LHJ7_MOUSE;tr|A0A140LJH3|A0A140LJH3_MOUSE;tr|A0A140LHT9|A0A140LHT9_MOUSE;tr|A0A140LHE0|A0A140LHE0_MOUSE;sp|A2AJ88|PLPL7_MOUSE	tr|A0A140LHU9|A0A140LHU9_MOUSE;tr|A0A140LI54|A0A140LI54_MOUSE;sp|Q3TRM4|PLPL6_MOUSE	tr|A0A140LHU9|A0A140LHU9_MOUSE Neuropathy target esterase OS=Mus musculus OX=10090 GN=Pnpla6 PE=1 SV=1;tr|A0A140LI54|A0A140LI54_MOUSE Neuropathy target esterase OS=Mus musculus OX=10090 GN=Pnpla6 PE=1 SV=1;sp|Q3TRM4|PLPL6_MOUSE Neuropathy target esterase O	A0A140LHU9	Pnpla6	Neuropathy target esterase	9	14	14	19.2	145.23	59170000	68431000	70002000	52092000	54547000	60547000	0.84607	0.0737033
sp|Q99KR7|PPIF_MOUSE;tr|Q8BQ12|Q8BQ12_MOUSE	sp|Q99KR7|PPIF_MOUSE	sp|Q99KR7|PPIF_MOUSE Peptidyl-prolyl cis-trans isomerase F, mitochondrial OS=Mus musculus OX=10090 GN=Ppif PE=1 SV=1	Q99KR7	Ppif	Peptidyl-prolyl cis-trans isomerase F, mitochondrial (PPIase F) (EC 5.2.1.8) (Cyclophilin D) (CyP-D) (CypD) (Cyclophilin F) (Rotamase F)	2	6	6	38.8	21.737	152190000	150180000	140700000	142390000	134690000	132610000	0.924662	0.073934
tr|Q3U2W2|Q3U2W2_MOUSE;sp|Q7TPV4|MBB1A_MOUSE;tr|A0JLT5|A0JLT5_MOUSE;tr|Q3TLF6|Q3TLF6_MOUSE	tr|Q3U2W2|Q3U2W2_MOUSE;sp|Q7TPV4|MBB1A_MOUSE;tr|A0JLT5|A0JLT5_MOUSE;tr|Q3TLF6|Q3TLF6_MOUSE	tr|Q3U2W2|Q3U2W2_MOUSE MYB binding protein (P160) 1a, isoform CRA_b OS=Mus musculus OX=10090 GN=Mybbp1a PE=1 SV=1;sp|Q7TPV4|MBB1A_MOUSE Myb-binding protein 1A OS=Mus musculus OX=10090 GN=Mybbp1a PE=1 SV=2;tr|A0JLT5|A0JLT5_MOUSE Mybbp1a protein (Fragment) O	Q3U2W2	Mybbp1a mCG_6657	MYB binding protein (P160) 1a, isoform CRA_b	4	70	70	57.9	152.04	6235100000	5994700000	6604400000	7274400000	6628100000	6815000000	1.09999	0.0742037
tr|A0A0R4J1H0|A0A0R4J1H0_MOUSE;tr|A2RTC8|A2RTC8_MOUSE;sp|Q3KNM2|MARH5_MOUSE;tr|F6W8T3|F6W8T3_MOUSE	tr|A0A0R4J1H0|A0A0R4J1H0_MOUSE;tr|A2RTC8|A2RTC8_MOUSE;sp|Q3KNM2|MARH5_MOUSE	tr|A0A0R4J1H0|A0A0R4J1H0_MOUSE E3 ubiquitin-protein ligase MARCH5 OS=Mus musculus OX=10090 GN=March5 PE=1 SV=1;tr|A2RTC8|A2RTC8_MOUSE MCG13921, isoform CRA_b OS=Mus musculus OX=10090 GN=March5 PE=1 SV=1;sp|Q3KNM2|MARH5_MOUSE E3 ubiquitin-protein ligase MAR	A0A0R4J1H0	March5 mCG_13921	E3 ubiquitin-protein ligase MARCH5 (MCG13921, isoform CRA_c)	4	7	7	33.6	27.363	184610000	159030000	155090000	193050000	188990000	185280000	1.13753	0.07426
sp|Q9D6K8|FUND2_MOUSE	sp|Q9D6K8|FUND2_MOUSE	sp|Q9D6K8|FUND2_MOUSE FUN14 domain-containing protein 2 OS=Mus musculus OX=10090 GN=Fundc2 PE=1 SV=1	Q9D6K8	Fundc2 Hcbp6	FUN14 domain-containing protein 2 (Hepatitis C virus core-binding protein 6)	1	6	6	34.4	16.564	170780000	173380000	152510000	154330000	136300000	145690000	0.878491	0.0743094
tr|D3YYE1|D3YYE1_MOUSE;tr|D3Z7M9|D3Z7M9_MOUSE;sp|O35381|AN32A_MOUSE;tr|F6UFG6|F6UFG6_MOUSE;sp|Q64G17|AN32C_MOUSE	tr|D3YYE1|D3YYE1_MOUSE;tr|D3Z7M9|D3Z7M9_MOUSE;sp|O35381|AN32A_MOUSE;tr|F6UFG6|F6UFG6_MOUSE	tr|D3YYE1|D3YYE1_MOUSE Acidic leucine-rich nuclear phosphoprotein 32 family member A (Fragment) OS=Mus musculus OX=10090 GN=Anp32a PE=1 SV=1;tr|D3Z7M9|D3Z7M9_MOUSE Acidic leucine-rich nuclear phosphoprotein 32 family member A OS=Mus musculus OX=10090 GN=An	D3YYE1	Anp32a	Acidic leucine-rich nuclear phosphoprotein 32 family member A (Fragment)	5	9	6	48.5	22.954	193990000	238360000	267590000	185880000	184940000	171910000	0.775395	0.0746302
sp|Q61102|ABCB7_MOUSE	sp|Q61102|ABCB7_MOUSE	sp|Q61102|ABCB7_MOUSE ATP-binding cassette sub-family B member 7, mitochondrial OS=Mus musculus OX=10090 GN=Abcb7 PE=1 SV=3	Q61102	Abcb7 Abc7	ATP-binding cassette sub-family B member 7, mitochondrial (ATP-binding cassette transporter 7) (ABC transporter 7 protein)	1	19	19	35.9	82.58	269460000	248550000	256740000	268940000	281370000	275210000	1.06553	0.0746665
tr|B2RTK3|B2RTK3_MOUSE;sp|Q6ZWY9|H2B1C_MOUSE;sp|Q64525|H2B2B_MOUSE;sp|Q64478|H2B1H_MOUSE;sp|P10854|H2B1M_MOUSE;tr|Q8VEE3|Q8VEE3_MOUSE;tr|Q8C622|Q8C622_MOUSE	tr|B2RTK3|B2RTK3_MOUSE;sp|Q6ZWY9|H2B1C_MOUSE;sp|Q64525|H2B2B_MOUSE;sp|Q64478|H2B1H_MOUSE;sp|P10854|H2B1M_MOUSE;tr|Q8VEE3|Q8VEE3_MOUSE	tr|B2RTK3|B2RTK3_MOUSE Histone H2B OS=Mus musculus OX=10090 GN=Hist1h2bm PE=1 SV=1;sp|Q6ZWY9|H2B1C_MOUSE Histone H2B type 1-C/E/G OS=Mus musculus OX=10090 GN=Hist1h2bc PE=1 SV=3;sp|Q64525|H2B2B_MOUSE Histone H2B type 2-B OS=Mus musculus OX=10090 GN=Hist2h2	B2RTK3	Hist1h2bm mCG_50239	Histone H2B	7	7	1	46.8	13.936	40120000000	42711000000	36856000000	34923000000	36393000000	35823000000	0.89516	0.0748393
sp|Q91VN6|DDX41_MOUSE;tr|A0A1S6GWJ4|A0A1S6GWJ4_MOUSE;tr|Q3TI21|Q3TI21_MOUSE;tr|Q9CUY2|Q9CUY2_MOUSE	sp|Q91VN6|DDX41_MOUSE;tr|A0A1S6GWJ4|A0A1S6GWJ4_MOUSE;tr|Q3TI21|Q3TI21_MOUSE	sp|Q91VN6|DDX41_MOUSE Probable ATP-dependent RNA helicase DDX41 OS=Mus musculus OX=10090 GN=Ddx41 PE=1 SV=2;tr|A0A1S6GWJ4|A0A1S6GWJ4_MOUSE DEAD (Asp-Glu-Ala-Asp) box polypeptide 41 OS=Mus musculus OX=10090 GN=Ddx41 PE=1 SV=1;tr|Q3TI21|Q3TI21_MOUSE Uncharac	Q91VN6	Ddx41	Probable ATP-dependent RNA helicase DDX41 (EC 3.6.4.13) (DEAD box protein 41)	4	18	1	36.3	69.819	154970000	155720000	156740000	164300000	163370000	180960000	1.08814	0.0748777
sp|Q5XJE5|LEO1_MOUSE	sp|Q5XJE5|LEO1_MOUSE	sp|Q5XJE5|LEO1_MOUSE RNA polymerase-associated protein LEO1 OS=Mus musculus OX=10090 GN=Leo1 PE=1 SV=2	Q5XJE5	Leo1 Gm185	RNA polymerase-associated protein LEO1	1	6	6	12.4	75.596	45740000	53724000	48459000	45305000	42421000	39451000	0.859751	0.0748885
tr|Q91YZ8|Q91YZ8_MOUSE;tr|A3KFU5|A3KFU5_MOUSE;tr|A3KFU8|A3KFU8_MOUSE;tr|Q6PHQ9|Q6PHQ9_MOUSE;tr|Q99LF8|Q99LF8_MOUSE;tr|Q3UX16|Q3UX16_MOUSE;tr|V9GXG3|V9GXG3_MOUSE;tr|Q3TSA5|Q3TSA5_MOUSE;tr|Q3TUS5|Q3TUS5_MOUSE;tr|A0A0A6YWT2|A0A0A6YWT2_MOUSE;tr|G5E8X2|G5E8X2_MOUSE	tr|Q91YZ8|Q91YZ8_MOUSE;tr|A3KFU5|A3KFU5_MOUSE;tr|A3KFU8|A3KFU8_MOUSE;tr|Q6PHQ9|Q6PHQ9_MOUSE;tr|Q99LF8|Q99LF8_MOUSE;tr|Q3UX16|Q3UX16_MOUSE	tr|Q91YZ8|Q91YZ8_MOUSE Polyadenylate-binding protein OS=Mus musculus OX=10090 GN=Pabpc4 PE=1 SV=1;tr|A3KFU5|A3KFU5_MOUSE Polyadenylate-binding protein OS=Mus musculus OX=10090 GN=Pabpc4 PE=1 SV=1;tr|A3KFU8|A3KFU8_MOUSE Polyadenylate-binding protein OS=Mus	Q91YZ8	Pabpc4	Polyadenylate-binding protein (PABP)	11	24	13	40.5	67.852	200690000	169780000	194600000	207360000	210830000	224840000	1.13797	0.0749105
tr|Q99N15|Q99N15_MOUSE;tr|A2AFQ2|A2AFQ2_MOUSE;tr|Q9CYT3|Q9CYT3_MOUSE;sp|O08756|HCD2_MOUSE	tr|Q99N15|Q99N15_MOUSE;tr|A2AFQ2|A2AFQ2_MOUSE;tr|Q9CYT3|Q9CYT3_MOUSE;sp|O08756|HCD2_MOUSE	tr|Q99N15|Q99N15_MOUSE 17beta-hydroxysteroid dehydrogenase type 10/short chain L-3-hydroxyacyl-CoA dehydrogenase OS=Mus musculus OX=10090 GN=Hsd17b10 PE=1 SV=1;tr|A2AFQ2|A2AFQ2_MOUSE 3-hydroxyacyl-CoA dehydrogenase type-2 OS=Mus musculus OX=10090 GN=Hsd17b	Q99N15	Hsd17b10 Hadh2 Hsd17b10/Schad	17beta-hydroxysteroid dehydrogenase type 10/short chain L-3-hydroxyacyl-CoA dehydrogenase (3-hydroxyacyl-CoA dehydrogenase type-2) (Hydroxysteroid (17-beta) dehydrogenase 10)	4	16	16	82	27.273	1260900000	1347100000	1250000000	1516500000	1395400000	1356400000	1.10635	0.0749231
tr|Q3U484|Q3U484_MOUSE;sp|Q62095|DDX3Y_MOUSE;tr|Q3TUR4|Q3TUR4_MOUSE	tr|Q3U484|Q3U484_MOUSE;sp|Q62095|DDX3Y_MOUSE	tr|Q3U484|Q3U484_MOUSE Uncharacterized protein OS=Mus musculus OX=10090 GN=Ddx3y PE=2 SV=1;sp|Q62095|DDX3Y_MOUSE ATP-dependent RNA helicase DDX3Y OS=Mus musculus OX=10090 GN=Ddx3y PE=1 SV=2	Q3U484	Ddx3y	Uncharacterized protein	3	32	1	43.8	73.384	386480000	358670000	403430000	404140000	424890000	426410000	1.09304	0.0750404
tr|Q3UGC5|Q3UGC5_MOUSE;tr|Q3TNR7|Q3TNR7_MOUSE;sp|P59017|B2L13_MOUSE;tr|A0A0N4SW24|A0A0N4SW24_MOUSE;tr|A0A0N4SW63|A0A0N4SW63_MOUSE	tr|Q3UGC5|Q3UGC5_MOUSE;tr|Q3TNR7|Q3TNR7_MOUSE;sp|P59017|B2L13_MOUSE	tr|Q3UGC5|Q3UGC5_MOUSE Uncharacterized protein OS=Mus musculus OX=10090 GN=Bcl2l13 PE=2 SV=1;tr|Q3TNR7|Q3TNR7_MOUSE Uncharacterized protein OS=Mus musculus OX=10090 GN=Bcl2l13 PE=2 SV=1;sp|P59017|B2L13_MOUSE Bcl-2-like protein 13 OS=Mus musculus OX=10090 G	Q3UGC5	Bcl2l13	Uncharacterized protein	5	9	9	33.4	46.647	164240000	143540000	139710000	116270000	138410000	118180000	0.833225	0.0750598
tr|A0A0G2JG59|A0A0G2JG59_MOUSE;tr|A0A0G2JFD8|A0A0G2JFD8_MOUSE;sp|Q7TPW1|NEXN_MOUSE;tr|G4W8R2|G4W8R2_MOUSE;tr|A0A0G2JEX1|A0A0G2JEX1_MOUSE;tr|G4W8R4|G4W8R4_MOUSE;tr|A0A0G2JGI1|A0A0G2JGI1_MOUSE;tr|A0A0G2JDY6|A0A0G2JDY6_MOUSE;tr|G4W8R3|G4W8R3_MOUSE;tr|A0A0G2JDZ8|A0A0G2JDZ8_MOUSE	tr|A0A0G2JG59|A0A0G2JG59_MOUSE;tr|A0A0G2JFD8|A0A0G2JFD8_MOUSE;sp|Q7TPW1|NEXN_MOUSE;tr|G4W8R2|G4W8R2_MOUSE;tr|A0A0G2JEX1|A0A0G2JEX1_MOUSE;tr|G4W8R4|G4W8R4_MOUSE;tr|A0A0G2JGI1|A0A0G2JGI1_MOUSE	tr|A0A0G2JG59|A0A0G2JG59_MOUSE Nexilin (Fragment) OS=Mus musculus OX=10090 GN=Nexn PE=1 SV=1;tr|A0A0G2JFD8|A0A0G2JFD8_MOUSE Nexilin OS=Mus musculus OX=10090 GN=Nexn PE=1 SV=1;sp|Q7TPW1|NEXN_MOUSE Nexilin OS=Mus musculus OX=10090 GN=Nexn PE=1 SV=3;tr|G4W8R2	A0A0G2JG59	Nexn	Nexilin (Fragment)	10	5	5	15	56.496	19451000	25892000	21657000	27385000	27017000	26318000	1.20478	0.075378
sp|P63024|VAMP3_MOUSE;tr|A0A0N4SUV3|A0A0N4SUV3_MOUSE;sp|Q62442|VAMP1_MOUSE;tr|D3YTU0|D3YTU0_MOUSE;tr|Q9CXX2|Q9CXX2_MOUSE	sp|P63024|VAMP3_MOUSE	sp|P63024|VAMP3_MOUSE Vesicle-associated membrane protein 3 OS=Mus musculus OX=10090 GN=Vamp3 PE=1 SV=1	P63024	Vamp3 Syb3	Vesicle-associated membrane protein 3 (VAMP-3) (Cellubrevin) (CEB) (Synaptobrevin-3)	5	5	2	54.4	11.48	267220000	297600000	260470000	251710000	243670000	246410000	0.898823	0.075414
tr|Q922S5|Q922S5_MOUSE;sp|Q8K2C7|OS9_MOUSE;tr|A0A1W2P6Z8|A0A1W2P6Z8_MOUSE	tr|Q922S5|Q922S5_MOUSE;sp|Q8K2C7|OS9_MOUSE	tr|Q922S5|Q922S5_MOUSE Os9 protein (Fragment) OS=Mus musculus OX=10090 GN=Os9 PE=2 SV=1;sp|Q8K2C7|OS9_MOUSE Protein OS-9 OS=Mus musculus OX=10090 GN=Os9 PE=1 SV=2	Q922S5	Os9	Os9 protein (Fragment)	3	10	10	27	64.838	55607000	72591000	56910000	48305000	50143000	47068000	0.786114	0.0754464
tr|Q544R7|Q544R7_MOUSE;tr|Q3U6W4|Q3U6W4_MOUSE;sp|O70252|HMOX2_MOUSE;tr|D3YX62|D3YX62_MOUSE;tr|D3YXN4|D3YXN4_MOUSE;tr|D3Z4A2|D3Z4A2_MOUSE	tr|Q544R7|Q544R7_MOUSE;tr|Q3U6W4|Q3U6W4_MOUSE;sp|O70252|HMOX2_MOUSE;tr|D3YX62|D3YX62_MOUSE	tr|Q544R7|Q544R7_MOUSE Heme oxygenase OS=Mus musculus OX=10090 GN=Hmox2 PE=1 SV=1;tr|Q3U6W4|Q3U6W4_MOUSE Heme oxygenase OS=Mus musculus OX=10090 GN=Hmox2 PE=2 SV=1;sp|O70252|HMOX2_MOUSE Heme oxygenase 2 OS=Mus musculus OX=10090 GN=Hmox2 PE=1 SV=1;tr|D3YX62	Q544R7	Hmox2 mCG_128722	Heme oxygenase (EC 1.14.14.18)	6	16	16	67.9	35.738	754670000	763960000	730530000	771930000	830750000	790000000	1.06381	0.0754577
sp|Q91WK1|SPRY4_MOUSE	sp|Q91WK1|SPRY4_MOUSE	sp|Q91WK1|SPRY4_MOUSE SPRY domain-containing protein 4 OS=Mus musculus OX=10090 GN=Spryd4 PE=1 SV=1	Q91WK1	Spryd4	SPRY domain-containing protein 4	1	5	5	30.4	23.275	41310000	46716000	49115000	42370000	36988000	35405000	0.836825	0.0754698
tr|A2VCS1|A2VCS1_MOUSE;sp|Q8JZS9|RM48_MOUSE;tr|A0A140LHT6|A0A140LHT6_MOUSE;tr|E9QPQ8|E9QPQ8_MOUSE;tr|A0A140LI40|A0A140LI40_MOUSE;tr|A0A140LI38|A0A140LI38_MOUSE;tr|A0A140LHD4|A0A140LHD4_MOUSE	tr|A2VCS1|A2VCS1_MOUSE;sp|Q8JZS9|RM48_MOUSE;tr|A0A140LHT6|A0A140LHT6_MOUSE;tr|E9QPQ8|E9QPQ8_MOUSE	tr|A2VCS1|A2VCS1_MOUSE MCG2852, isoform CRA_a OS=Mus musculus OX=10090 GN=Mrpl48 PE=2 SV=1;sp|Q8JZS9|RM48_MOUSE 39S ribosomal protein L48, mitochondrial OS=Mus musculus OX=10090 GN=Mrpl48 PE=1 SV=1;tr|A0A140LHT6|A0A140LHT6_MOUSE 39S ribosomal protein L48,	A2VCS1	Mrpl48 mCG_2852	MCG2852, isoform CRA_a (Mitochondrial ribosomal protein L48)	7	4	4	38.1	12.94	80718000	89009000	64344000	102440000	100010000	90063000	1.24968	0.0757696
tr|Q70KX6|Q70KX6_MOUSE;tr|Q3UUV0|Q3UUV0_MOUSE;tr|Q3TMV1|Q3TMV1_MOUSE;tr|Q3TXU6|Q3TXU6_MOUSE;tr|A2AN61|A2AN61_MOUSE;tr|Q8VEH2|Q8VEH2_MOUSE;tr|F6XWQ4|F6XWQ4_MOUSE;tr|Q6GQU3|Q6GQU3_MOUSE;tr|Q8BIT2|Q8BIT2_MOUSE;tr|Q9CUW6|Q9CUW6_MOUSE;tr|F7AT58|F7AT58_MOUSE	tr|Q70KX6|Q70KX6_MOUSE;tr|Q3UUV0|Q3UUV0_MOUSE;tr|Q3TMV1|Q3TMV1_MOUSE;tr|Q3TXU6|Q3TXU6_MOUSE;tr|A2AN61|A2AN61_MOUSE;tr|Q8VEH2|Q8VEH2_MOUSE;tr|F6XWQ4|F6XWQ4_MOUSE;tr|Q6GQU3|Q6GQU3_MOUSE;tr|Q8BIT2|Q8BIT2_MOUSE	tr|Q70KX6|Q70KX6_MOUSE Cip1-interacting zinc-finger protein OS=Mus musculus OX=10090 GN=Ciz1 PE=2 SV=1;tr|Q3UUV0|Q3UUV0_MOUSE CDKN1A-interacting zinc finger protein 1 OS=Mus musculus OX=10090 GN=Ciz1 PE=1 SV=1;tr|Q3TMV1|Q3TMV1_MOUSE Uncharacterized protein	Q70KX6	Ciz1	Cip1-interacting zinc-finger protein	11	3	3	6.5	78.019	11433000	11767000	NaN	21349000	14760000	21335000	1.65069	0.0761913
sp|Q8R5J9|PRAF3_MOUSE	sp|Q8R5J9|PRAF3_MOUSE	sp|Q8R5J9|PRAF3_MOUSE PRA1 family protein 3 OS=Mus musculus OX=10090 GN=Arl6ip5 PE=1 SV=2	Q8R5J9	Arl6ip5 Aip5 Jwa Pra2 Praf3	PRA1 family protein 3 (ADP-ribosylation factor-like protein 6-interacting protein 5) (ARL-6-interacting protein 5) (Aip-5) (Addicsin) (GTRAP3-18) (Glutamate transporter EAAC1-interacting protein) (Prenylated Rab acceptor protein 2) (Protein JWa)	1	6	6	28.7	21.557	276140000	265860000	258030000	252790000	250750000	227230000	0.913428	0.0766807
sp|Q8VDS8|STX18_MOUSE;tr|D3YY98|D3YY98_MOUSE;tr|A0A0J9YTY5|A0A0J9YTY5_MOUSE;tr|A0A0J9YUA5|A0A0J9YUA5_MOUSE	sp|Q8VDS8|STX18_MOUSE;tr|D3YY98|D3YY98_MOUSE;tr|A0A0J9YTY5|A0A0J9YTY5_MOUSE	sp|Q8VDS8|STX18_MOUSE Syntaxin-18 OS=Mus musculus OX=10090 GN=Stx18 PE=1 SV=2;tr|D3YY98|D3YY98_MOUSE Syntaxin-18 (Fragment) OS=Mus musculus OX=10090 GN=Stx18 PE=1 SV=1;tr|A0A0J9YTY5|A0A0J9YTY5_MOUSE Syntaxin-18 (Fragment) OS=Mus musculus OX=10090 GN=Stx18	Q8VDS8	Stx18	Syntaxin-18	4	8	8	27.2	38.381	55735000	47910000	45373000	60923000	54205000	62548000	1.19231	0.0768154
tr|Q9QZ83|Q9QZ83_MOUSE	tr|Q9QZ83|Q9QZ83_MOUSE	tr|Q9QZ83|Q9QZ83_MOUSE Gamma actin-like protein OS=Mus musculus OX=10090 GN=Actg1 PE=2 SV=1	Q9QZ83	Actg1 Actl	Gamma actin-like protein	1	21	2	62.3	43.6	3124200000	3314300000	2999700000	2985700000	2846500000	2893900000	0.924551	0.0768784
tr|Q3TIC8|Q3TIC8_MOUSE;sp|Q9CZ13|QCR1_MOUSE;tr|Q3THM1|Q3THM1_MOUSE;tr|Q8K2S8|Q8K2S8_MOUSE;tr|Q8VEJ2|Q8VEJ2_MOUSE;tr|A0A0A6YW82|A0A0A6YW82_MOUSE;tr|A0A0A6YWX6|A0A0A6YWX6_MOUSE;tr|A0A0A6YVZ0|A0A0A6YVZ0_MOUSE	tr|Q3TIC8|Q3TIC8_MOUSE;sp|Q9CZ13|QCR1_MOUSE;tr|Q3THM1|Q3THM1_MOUSE;tr|Q8K2S8|Q8K2S8_MOUSE	tr|Q3TIC8|Q3TIC8_MOUSE Uncharacterized protein OS=Mus musculus OX=10090 GN=Uqcrc1 PE=2 SV=1;sp|Q9CZ13|QCR1_MOUSE Cytochrome b-c1 complex subunit 1, mitochondrial OS=Mus musculus OX=10090 GN=Uqcrc1 PE=1 SV=2;tr|Q3THM1|Q3THM1_MOUSE Uncharacterized protein OS	Q3TIC8	Uqcrc1	Uncharacterized protein	8	20	19	55.6	52.752	2567300000	2556500000	2414600000	2645400000	2692100000	2599100000	1.05282	0.0769681
sp|Q9CQI7|RU2B_MOUSE;tr|A2CES4|A2CES4_MOUSE;tr|Q62379|Q62379_MOUSE;tr|Q62378|Q62378_MOUSE	sp|Q9CQI7|RU2B_MOUSE;tr|A2CES4|A2CES4_MOUSE;tr|Q62379|Q62379_MOUSE	sp|Q9CQI7|RU2B_MOUSE U2 small nuclear ribonucleoprotein B OS=Mus musculus OX=10090 GN=Snrpb2 PE=1 SV=1;tr|A2CES4|A2CES4_MOUSE U2 small nuclear ribonucleoprotein B (Fragment) OS=Mus musculus OX=10090 GN=Snrpb2 PE=1 SV=1;tr|Q62379|Q62379_MOUSE U2-snRNP-s	Q9CQI7	Snrpb2	U2 small nuclear ribonucleoprotein B'' (U2 snRNP B'')	4	8	6	38.7	25.323	351080000	371290000	392300000	398440000	398930000	402240000	1.0762	0.0770381
sp|Q61581|IBP7_MOUSE;tr|F8WH23|F8WH23_MOUSE;tr|E9Q5D9|E9Q5D9_MOUSE;tr|Q811C8|Q811C8_MOUSE;tr|A0A5E1|A0A5E1_MOUSE;tr|Q3UFA6|Q3UFA6_MOUSE;tr|Q3U131|Q3U131_MOUSE	sp|Q61581|IBP7_MOUSE;tr|F8WH23|F8WH23_MOUSE;tr|E9Q5D9|E9Q5D9_MOUSE;tr|Q811C8|Q811C8_MOUSE;tr|A0A5E1|A0A5E1_MOUSE;tr|Q3UFA6|Q3UFA6_MOUSE;tr|Q3U131|Q3U131_MOUSE	sp|Q61581|IBP7_MOUSE Insulin-like growth factor-binding protein 7 OS=Mus musculus OX=10090 GN=Igfbp7 PE=1 SV=3;tr|F8WH23|F8WH23_MOUSE Insulin-like growth factor-binding protein 7 OS=Mus musculus OX=10090 GN=Igfbp7 PE=1 SV=1;tr|E9Q5D9|E9Q5D9_MOUSE Insulin-l	Q61581	Igfbp7 Mac25	Insulin-like growth factor-binding protein 7 (IBP-7) (IGF-binding protein 7) (IGFBP-7) (MAC25 protein)	7	6	6	23.5	28.969	32462000	32001000	31777000	36814000	34646000	43313000	1.19257	0.0772154
sp|Q9JIH2|NUP50_MOUSE	sp|Q9JIH2|NUP50_MOUSE	sp|Q9JIH2|NUP50_MOUSE Nuclear pore complex protein Nup50 OS=Mus musculus OX=10090 GN=Nup50 PE=1 SV=3	Q9JIH2	Nup50 Npap60	Nuclear pore complex protein Nup50 (50 kDa nucleoporin) (Nuclear pore-associated protein 60 kDa-like) (Nucleoporin Nup50)	1	17	17	50.9	49.485	433770000	427160000	480140000	424430000	360490000	338500000	0.837704	0.0773447
sp|Q8R570|SNP47_MOUSE;tr|B2FDF6|B2FDF6_MOUSE;tr|I7HPB1|I7HPB1_MOUSE;tr|I7HFU4|I7HFU4_MOUSE;tr|J3JS29|J3JS29_MOUSE	sp|Q8R570|SNP47_MOUSE;tr|B2FDF6|B2FDF6_MOUSE	sp|Q8R570|SNP47_MOUSE Synaptosomal-associated protein 47 OS=Mus musculus OX=10090 GN=Snap47 PE=1 SV=1;tr|B2FDF6|B2FDF6_MOUSE Synaptosomal-associated protein 47 OS=Mus musculus OX=10090 GN=Snap47 PE=1 SV=1	Q8R570	Snap47	Synaptosomal-associated protein 47 (SNAP-47) (Synaptosomal-associated 47 kDa protein)	5	9	9	32	46.524	59468000	58429000	68136000	77368000	68735000	69341000	1.1581	0.0773897
tr|B7ZWC4|B7ZWC4_MOUSE;sp|Q07113|MPRI_MOUSE;tr|B9EKB8|B9EKB8_MOUSE;tr|Q8C2F9|Q8C2F9_MOUSE;tr|Q8K0J1|Q8K0J1_MOUSE;tr|Q8C6V9|Q8C6V9_MOUSE;tr|Q80VF2|Q80VF2_MOUSE;tr|Q7TMR1|Q7TMR1_MOUSE	tr|B7ZWC4|B7ZWC4_MOUSE;sp|Q07113|MPRI_MOUSE;tr|B9EKB8|B9EKB8_MOUSE	tr|B7ZWC4|B7ZWC4_MOUSE Insulin-like growth factor 2 receptor OS=Mus musculus OX=10090 GN=Igf2r PE=2 SV=1;sp|Q07113|MPRI_MOUSE Cation-independent mannose-6-phosphate receptor OS=Mus musculus OX=10090 GN=Igf2r PE=1 SV=1;tr|B9EKB8|B9EKB8_MOUSE Insulin-like gr	B7ZWC4	Igf2r	Insulin-like growth factor 2 receptor	8	56	56	29	273.86	1241100000	1314200000	1152300000	1131000000	1131700000	1108900000	0.909375	0.0774393
tr|A2A5V3|A2A5V3_MOUSE;tr|A2A5V2|A2A5V2_MOUSE;sp|P55194|3BP1_MOUSE;tr|S4R2D3|S4R2D3_MOUSE;tr|A0A2R8W6I7|A0A2R8W6I7_MOUSE;tr|S4R2T6|S4R2T6_MOUSE;tr|A2A5V1|A2A5V1_MOUSE	tr|A2A5V3|A2A5V3_MOUSE;tr|A2A5V2|A2A5V2_MOUSE;sp|P55194|3BP1_MOUSE;tr|S4R2D3|S4R2D3_MOUSE;tr|A0A2R8W6I7|A0A2R8W6I7_MOUSE;tr|S4R2T6|S4R2T6_MOUSE	tr|A2A5V3|A2A5V3_MOUSE SH3 domain-binding protein 1 OS=Mus musculus OX=10090 GN=Sh3bp1 PE=1 SV=1;tr|A2A5V2|A2A5V2_MOUSE SH3 domain-binding protein 1 OS=Mus musculus OX=10090 GN=Sh3bp1 PE=1 SV=1;sp|P55194|3BP1_MOUSE SH3 domain-binding protein 1 OS=Mus muscu	A2A5V3	Sh3bp1	SH3 domain-binding protein 1	7	9	9	20.4	64.462	50478000	49026000	61173000	46757000	38122000	43357000	0.798098	0.0775714
sp|Q9R190|MTA2_MOUSE;tr|Q3TZP3|Q3TZP3_MOUSE;tr|Q3UDZ8|Q3UDZ8_MOUSE	sp|Q9R190|MTA2_MOUSE;tr|Q3TZP3|Q3TZP3_MOUSE;tr|Q3UDZ8|Q3UDZ8_MOUSE	sp|Q9R190|MTA2_MOUSE Metastasis-associated protein MTA2 OS=Mus musculus OX=10090 GN=Mta2 PE=1 SV=1;tr|Q3TZP3|Q3TZP3_MOUSE Uncharacterized protein OS=Mus musculus OX=10090 GN=Mta2 PE=2 SV=1;tr|Q3UDZ8|Q3UDZ8_MOUSE Uncharacterized protein (Fragment) OS=Mus mu	Q9R190	Mta2 Mta1l1	Metastasis-associated protein MTA2 (Metastasis-associated 1-like 1)	3	22	19	40.1	75.029	253250000	253380000	312930000	356930000	315000000	317870000	1.20772	0.0775945
tr|Q05CR0|Q05CR0_MOUSE;tr|Q811J2|Q811J2_MOUSE	tr|Q05CR0|Q05CR0_MOUSE;tr|Q811J2|Q811J2_MOUSE	tr|Q05CR0|Q05CR0_MOUSE LOC72520 protein (Fragment) OS=Mus musculus OX=10090 GN=LOC72520 PE=2 SV=1;tr|Q811J2|Q811J2_MOUSE LOC72520 protein (Fragment) OS=Mus musculus OX=10090 GN=LOC72520 PE=2 SV=2	Q05CR0	LOC72520	LOC72520 protein (Fragment)	2	3	3	12.6	41.204	29528000	28427000	27612000	33396000	30856000	29812000	1.0993	0.0776937
sp|Q9JLI8|SART3_MOUSE	sp|Q9JLI8|SART3_MOUSE	sp|Q9JLI8|SART3_MOUSE Squamous cell carcinoma antigen recognized by T-cells 3 OS=Mus musculus OX=10090 GN=Sart3 PE=1 SV=1	Q9JLI8	Sart3 Kiaa0156	Squamous cell carcinoma antigen recognized by T-cells 3 (SART-3) (mSART-3) (Tumor-rejection antigen SART3)	1	11	11	14.3	109.62	37686000	36883000	54955000	61302000	58011000	54305000	1.34043	0.0777785
tr|Q80UX3|Q80UX3_MOUSE;tr|F8WH20|F8WH20_MOUSE;tr|Q6A012|Q6A012_MOUSE;tr|D3Z194|D3Z194_MOUSE;sp|Q9DBS9|OSBL3_MOUSE;tr|D3YTT6|D3YTT6_MOUSE;tr|A0A0N4SVU7|A0A0N4SVU7_MOUSE;tr|Q8R1X8|Q8R1X8_MOUSE;tr|V9GXX3|V9GXX3_MOUSE;sp|Q8BXR9|OSBL6_MOUSE;tr|F8WIZ7|F8WIZ7_MOUSE;tr|Q5DTM2|Q5DTM2_MOUSE	tr|Q80UX3|Q80UX3_MOUSE;tr|F8WH20|F8WH20_MOUSE;tr|Q6A012|Q6A012_MOUSE;tr|D3Z194|D3Z194_MOUSE;sp|Q9DBS9|OSBL3_MOUSE;tr|D3YTT6|D3YTT6_MOUSE	tr|Q80UX3|Q80UX3_MOUSE Oxysterol-binding protein OS=Mus musculus OX=10090 GN=Osbpl3 PE=2 SV=1;tr|F8WH20|F8WH20_MOUSE Oxysterol-binding protein OS=Mus musculus OX=10090 GN=Osbpl3 PE=1 SV=1;tr|Q6A012|Q6A012_MOUSE MKIAA0704 protein (Fragment) OS=Mus musculus	Q80UX3	Osbpl3	Oxysterol-binding protein	12	10	10	16.6	93.002	58387000	57094000	59263000	55336000	51719000	56538000	0.936187	0.0782064
tr|Q543T1|Q543T1_MOUSE;tr|Q3UZ23|Q3UZ23_MOUSE;sp|P22437|PGH1_MOUSE;tr|Q3TJN9|Q3TJN9_MOUSE	tr|Q543T1|Q543T1_MOUSE;tr|Q3UZ23|Q3UZ23_MOUSE;sp|P22437|PGH1_MOUSE;tr|Q3TJN9|Q3TJN9_MOUSE	tr|Q543T1|Q543T1_MOUSE Prostaglandin-endoperoxide synthase 1 OS=Mus musculus OX=10090 GN=Ptgs1 PE=1 SV=1;tr|Q3UZ23|Q3UZ23_MOUSE Uncharacterized protein OS=Mus musculus OX=10090 GN=Ptgs1 PE=2 SV=1;sp|P22437|PGH1_MOUSE Prostaglandin G/H synthase 1 OS=Mus mus	Q543T1	Ptgs1 mCG_22272	Prostaglandin-endoperoxide synthase 1 (Ptgs1 protein)	4	16	15	33.7	69.042	458530000	452060000	417580000	424190000	396770000	396490000	0.916637	0.0782255
sp|Q9CPR5|RM15_MOUSE;tr|A0A0A6YVP4|A0A0A6YVP4_MOUSE;tr|F8WHN1|F8WHN1_MOUSE	sp|Q9CPR5|RM15_MOUSE;tr|A0A0A6YVP4|A0A0A6YVP4_MOUSE	sp|Q9CPR5|RM15_MOUSE 39S ribosomal protein L15, mitochondrial OS=Mus musculus OX=10090 GN=Mrpl15 PE=1 SV=1;tr|A0A0A6YVP4|A0A0A6YVP4_MOUSE 39S ribosomal protein L15, mitochondrial OS=Mus musculus OX=10090 GN=Mrpl15 PE=1 SV=1	Q9CPR5	Mrpl15	39S ribosomal protein L15, mitochondrial (L15mt) (MRP-L15)	3	12	12	43.7	33.541	235730000	214420000	207820000	193610000	202520000	199720000	0.905588	0.0787812
sp|Q80X71|T106B_MOUSE;tr|D3Z191|D3Z191_MOUSE;tr|D3Z6E0|D3Z6E0_MOUSE;tr|D3Z0M2|D3Z0M2_MOUSE;tr|Q9D3D8|Q9D3D8_MOUSE	sp|Q80X71|T106B_MOUSE;tr|D3Z191|D3Z191_MOUSE;tr|D3Z6E0|D3Z6E0_MOUSE;tr|D3Z0M2|D3Z0M2_MOUSE;tr|Q9D3D8|Q9D3D8_MOUSE	sp|Q80X71|T106B_MOUSE Transmembrane protein 106B OS=Mus musculus OX=10090 GN=Tmem106b PE=1 SV=1;tr|D3Z191|D3Z191_MOUSE Transmembrane protein 106B (Fragment) OS=Mus musculus OX=10090 GN=Tmem106b PE=1 SV=8;tr|D3Z6E0|D3Z6E0_MOUSE Transmembrane protein 106B (F	Q80X71	Tmem106b	Transmembrane protein 106B	5	4	4	20.7	31.172	63332000	63520000	57323000	56024000	56188000	47799000	0.868799	0.0790573
tr|D3Z0F5|D3Z0F5_MOUSE;tr|Q3UIT2|Q3UIT2_MOUSE;sp|O88545|CSN6_MOUSE;tr|F6QK86|F6QK86_MOUSE	tr|D3Z0F5|D3Z0F5_MOUSE;tr|Q3UIT2|Q3UIT2_MOUSE;sp|O88545|CSN6_MOUSE	tr|D3Z0F5|D3Z0F5_MOUSE COP9 signalosome complex subunit 6 OS=Mus musculus OX=10090 GN=Cops6 PE=1 SV=1;tr|Q3UIT2|Q3UIT2_MOUSE COP9 (Constitutive photomorphogenic) homolog, subunit 6 (Arabidopsis thaliana), isoform CRA_b OS=Mus musculus OX=10090 GN=Cops6 PE=	D3Z0F5	Cops6	COP9 signalosome complex subunit 6	4	8	8	39.4	33.591	56993000	58639000	68931000	74060000	67048000	77721000	1.18566	0.0790858
tr|Z4YKM2|Z4YKM2_MOUSE;tr|B2RWE3|B2RWE3_MOUSE;sp|B1AR13|CISD3_MOUSE;tr|B3DFI8|B3DFI8_MOUSE	tr|Z4YKM2|Z4YKM2_MOUSE;tr|B2RWE3|B2RWE3_MOUSE;sp|B1AR13|CISD3_MOUSE;tr|B3DFI8|B3DFI8_MOUSE	tr|Z4YKM2|Z4YKM2_MOUSE CDGSH iron-sulfur domain-containing protein 3, mitochondrial OS=Mus musculus OX=10090 GN=Cisd3 PE=1 SV=1;tr|B2RWE3|B2RWE3_MOUSE CDGSH iron sulfur domain 3 OS=Mus musculus OX=10090 GN=Cisd3 PE=1 SV=1;sp|B1AR13|CISD3_MOUSE CDGSH iron-s	Z4YKM2	Cisd3	CDGSH iron-sulfur domain-containing protein 3, mitochondrial	4	5	5	43.5	13.155	182780000	177910000	147290000	149100000	140440000	135600000	0.836923	0.0791737
tr|B2RS09|B2RS09_MOUSE;sp|Q7JJ13|BRD2_MOUSE;tr|I7HPW1|I7HPW1_MOUSE;tr|U3KLT0|U3KLT0_MOUSE;tr|Q3TH63|Q3TH63_MOUSE;tr|G3UZR9|G3UZR9_MOUSE	tr|B2RS09|B2RS09_MOUSE;sp|Q7JJ13|BRD2_MOUSE;tr|I7HPW1|I7HPW1_MOUSE;tr|U3KLT0|U3KLT0_MOUSE	tr|B2RS09|B2RS09_MOUSE Bromodomain containing 2 OS=Mus musculus OX=10090 GN=Brd2 PE=2 SV=1;sp|Q7JJ13|BRD2_MOUSE Bromodomain-containing protein 2 OS=Mus musculus OX=10090 GN=Brd2 PE=1 SV=1;tr|I7HPW1|I7HPW1_MOUSE Bromodomain containing 2 (Fragment) OS=Mus mu	B2RS09	Brd2 mCG_132699 RP23-222K15.1-001	Bromodomain containing 2	6	19	16	33	88.066	168440000	192380000	168160000	203120000	189300000	218840000	1.15554	0.0792857
sp|B1AXP6|TOM5_MOUSE	sp|B1AXP6|TOM5_MOUSE	sp|B1AXP6|TOM5_MOUSE Mitochondrial import receptor subunit TOM5 homolog OS=Mus musculus OX=10090 GN=Tomm5 PE=3 SV=1	B1AXP6	Tomm5 Tom5	Mitochondrial import receptor subunit TOM5 homolog	1	3	3	29.4	6.0372	221150000	210830000	200190000	231450000	219680000	238840000	1.09143	0.0792967
tr|Q8VED0|Q8VED0_MOUSE;sp|P16332|MUTA_MOUSE;tr|A0A3B2WCT0|A0A3B2WCT0_MOUSE	tr|Q8VED0|Q8VED0_MOUSE;sp|P16332|MUTA_MOUSE	tr|Q8VED0|Q8VED0_MOUSE Mut protein OS=Mus musculus OX=10090 GN=Mmut PE=2 SV=1;sp|P16332|MUTA_MOUSE Methylmalonyl-CoA mutase, mitochondrial OS=Mus musculus OX=10090 GN=Mmut PE=1 SV=2	Q8VED0	Mmut Mut	Mut protein	3	19	19	41	82.817	300710000	291850000	260190000	243190000	264030000	248730000	0.886485	0.0793567
sp|Q8BGA5|KRR1_MOUSE;tr|G3UZA0|G3UZA0_MOUSE;tr|Q8BVE7|Q8BVE7_MOUSE	sp|Q8BGA5|KRR1_MOUSE;tr|G3UZA0|G3UZA0_MOUSE	sp|Q8BGA5|KRR1_MOUSE KRR1 small subunit processome component homolog OS=Mus musculus OX=10090 GN=Krr1 PE=2 SV=1;tr|G3UZA0|G3UZA0_MOUSE KRR1 small subunit processome component OS=Mus musculus OX=10090 GN=Krr1 PE=1 SV=1	Q8BGA5	Krr1 Hrb2	KRR1 small subunit processome component homolog (HIV-1 Rev-binding protein 2 homolog) (KRR-R motif-containing protein 1)	3	12	12	39.7	43.537	201010000	220190000	181350000	227890000	226050000	227410000	1.13078	0.0793944
tr|Q8C660|Q8C660_MOUSE;sp|P58468|F207A_MOUSE;tr|Q3TVF6|Q3TVF6_MOUSE;tr|Q8C2N1|Q8C2N1_MOUSE	tr|Q8C660|Q8C660_MOUSE;sp|P58468|F207A_MOUSE;tr|Q3TVF6|Q3TVF6_MOUSE;tr|Q8C2N1|Q8C2N1_MOUSE	tr|Q8C660|Q8C660_MOUSE RIKEN cDNA 1810008A18, isoform CRA_a OS=Mus musculus OX=10090 GN=Fam207a PE=2 SV=1;sp|P58468|F207A_MOUSE Protein FAM207A OS=Mus musculus OX=10090 GN=Fam207a PE=1 SV=1;tr|Q3TVF6|Q3TVF6_MOUSE Protein FAM207A (Fragment) OS=Mus musculus	Q8C660	Fam207a 1810008A18Rik mCG_3376	RIKEN cDNA 1810008A18, isoform CRA_a	4	4	4	26.1	24.657	28498000	23767000	23871000	20490000	NaN	19599000	0.789817	0.079452
tr|A2AEW0|A2AEW0_MOUSE;tr|Q3U1L5|Q3U1L5_MOUSE;tr|A2AEW1|A2AEW1_MOUSE;sp|Q64092|TFE3_MOUSE;tr|I6L9I6|I6L9I6_MOUSE;tr|A0A0N4SV79|A0A0N4SV79_MOUSE;tr|Q8C6Y4|Q8C6Y4_MOUSE;tr|Q32MU7|Q32MU7_MOUSE;tr|E9PZ28|E9PZ28_MOUSE;sp|Q08874|MITF_MOUSE;sp|Q9WTW4|TFEC_MOUSE;tr|F6W7D6|F6W7D6_MOUSE	tr|A2AEW0|A2AEW0_MOUSE;tr|Q3U1L5|Q3U1L5_MOUSE;tr|A2AEW1|A2AEW1_MOUSE;sp|Q64092|TFE3_MOUSE	tr|A2AEW0|A2AEW0_MOUSE Transcription factor E3 OS=Mus musculus OX=10090 GN=Tfe3 PE=1 SV=1;tr|Q3U1L5|Q3U1L5_MOUSE Uncharacterized protein (Fragment) OS=Mus musculus OX=10090 GN=Tfe3 PE=2 SV=1;tr|A2AEW1|A2AEW1_MOUSE Transcription factor E3 OS=Mus musculus OX	A2AEW0	Tfe3	Transcription factor E3	12	7	5	18.4	57.736	44883000	47053000	50306000	52585000	54745000	49811000	1.10474	0.0797857
sp|Q8K0B2|LMBD1_MOUSE	sp|Q8K0B2|LMBD1_MOUSE	sp|Q8K0B2|LMBD1_MOUSE Probable lysosomal cobalamin transporter OS=Mus musculus OX=10090 GN=Lmbrd1 PE=1 SV=1	Q8K0B2	Lmbrd1	Probable lysosomal cobalamin transporter (LMBR1 domain-containing protein 1) (Protein N90b)	1	1	1	3.4	61.062	23758000	24570000	23841000	NaN	31971000	26640000	1.2182	0.0799783
tr|Q0PD48|Q0PD48_MOUSE;sp|Q9R0M6|RAB9A_MOUSE;tr|A2AFP5|A2AFP5_MOUSE;tr|A2AFP4|A2AFP4_MOUSE	tr|Q0PD48|Q0PD48_MOUSE;sp|Q9R0M6|RAB9A_MOUSE;tr|A2AFP5|A2AFP5_MOUSE	tr|Q0PD48|Q0PD48_MOUSE MCG116026, isoform CRA_a OS=Mus musculus OX=10090 GN=Rab9 PE=1 SV=1;sp|Q9R0M6|RAB9A_MOUSE Ras-related protein Rab-9A OS=Mus musculus OX=10090 GN=Rab9a PE=1 SV=1;tr|A2AFP5|A2AFP5_MOUSE RAB9, member RAS oncogene family (Fragment) OS=Mu	Q0PD48	Rab9 Rab9A mCG_116026	MCG116026, isoform CRA_a (Rab9A)	4	7	7	50.7	22.909	87904000	96310000	81044000	66424000	72253000	82099000	0.832307	0.0800366
tr|E0CXE7|E0CXE7_MOUSE;sp|Q5SUQ9|CTC1_MOUSE	tr|E0CXE7|E0CXE7_MOUSE;sp|Q5SUQ9|CTC1_MOUSE	tr|E0CXE7|E0CXE7_MOUSE CST complex subunit CTC1 OS=Mus musculus OX=10090 GN=Ctc1 PE=1 SV=1;sp|Q5SUQ9|CTC1_MOUSE CST complex subunit CTC1 OS=Mus musculus OX=10090 GN=Ctc1 PE=1 SV=2	E0CXE7	Ctc1 1500010J02Rik	CST complex subunit CTC1	2	3	3	6.6	106.47	9317200	9358600	NaN	9689800	10453000	10471000	1.09282	0.080041
sp|Q91VC9|GHITM_MOUSE;tr|A0A286YDK2|A0A286YDK2_MOUSE	sp|Q91VC9|GHITM_MOUSE;tr|A0A286YDK2|A0A286YDK2_MOUSE	sp|Q91VC9|GHITM_MOUSE Growth hormone-inducible transmembrane protein OS=Mus musculus OX=10090 GN=Ghitm PE=1 SV=1;tr|A0A286YDK2|A0A286YDK2_MOUSE Growth hormone-inducible transmembrane protein (Fragment) OS=Mus musculus OX=10090 GN=Ghitm PE=1 SV=1	Q91VC9	Ghitm Mics1	Growth hormone-inducible transmembrane protein (Mitochondrial morphology and cristae structure 1) (MICS1)	2	4	4	12.1	37.275	78278000	73062000	60217000	111920000	86156000	85239000	1.33919	0.0801408
sp|Q91VT1|NSE2_MOUSE;tr|A0A2I3BS18|A0A2I3BS18_MOUSE	sp|Q91VT1|NSE2_MOUSE;tr|A0A2I3BS18|A0A2I3BS18_MOUSE	sp|Q91VT1|NSE2_MOUSE E3 SUMO-protein ligase NSE2 OS=Mus musculus OX=10090 GN=Nsmce2 PE=2 SV=1;tr|A0A2I3BS18|A0A2I3BS18_MOUSE E3 SUMO-protein ligase NSE2 OS=Mus musculus OX=10090 GN=Nsmce2 PE=1 SV=1	Q91VT1	Nsmce2 Mms21	E3 SUMO-protein ligase NSE2 (EC 2.3.2.-) (E3 SUMO-protein transferase NSE2) (MMS21 homolog) (Non-structural maintenance of chromosomes element 2 homolog) (Non-SMC element 2 homolog)	2	6	6	25.5	28.231	34356000	42732000	31803000	46253000	44967000	42209000	1.22534	0.0802127
tr|F8WGW3|F8WGW3_MOUSE;sp|Q497V5|SRBD1_MOUSE;tr|Q8CHZ0|Q8CHZ0_MOUSE;tr|B7ZWI7|B7ZWI7_MOUSE;tr|B7ZWI4|B7ZWI4_MOUSE	tr|F8WGW3|F8WGW3_MOUSE;sp|Q497V5|SRBD1_MOUSE;tr|Q8CHZ0|Q8CHZ0_MOUSE	tr|F8WGW3|F8WGW3_MOUSE S1 RNA-binding domain-containing protein 1 OS=Mus musculus OX=10090 GN=Srbd1 PE=1 SV=1;sp|Q497V5|SRBD1_MOUSE S1 RNA-binding domain-containing protein 1 OS=Mus musculus OX=10090 GN=Srbd1 PE=2 SV=3;tr|Q8CHZ0|Q8CHZ0_MOUSE S1 RNA binding	F8WGW3	Srbd1	S1 RNA-binding domain-containing protein 1	5	7	7	8.4	110.19	55065000	65096000	61238000	55339000	52572000	47456000	0.856493	0.080224
sp|Q9Z103|ADNP_MOUSE;tr|Q6ZQ47|Q6ZQ47_MOUSE;tr|Q3UYC8|Q3UYC8_MOUSE;tr|Q5BL11|Q5BL11_MOUSE;tr|Q5RKY4|Q5RKY4_MOUSE;tr|Q8BNY2|Q8BNY2_MOUSE	sp|Q9Z103|ADNP_MOUSE;tr|Q6ZQ47|Q6ZQ47_MOUSE;tr|Q3UYC8|Q3UYC8_MOUSE;tr|Q5BL11|Q5BL11_MOUSE;tr|Q5RKY4|Q5RKY4_MOUSE	sp|Q9Z103|ADNP_MOUSE Activity-dependent neuroprotector homeobox protein OS=Mus musculus OX=10090 GN=Adnp PE=1 SV=2;tr|Q6ZQ47|Q6ZQ47_MOUSE MKIAA0784 protein (Fragment) OS=Mus musculus OX=10090 GN=Adnp PE=2 SV=1;tr|Q3UYC8|Q3UYC8_MOUSE Uncharacterized protein	Q9Z103	Adnp	Activity-dependent neuroprotector homeobox protein (Activity-dependent neuroprotective protein)	6	28	28	37.5	124.31	358180000	380390000	349240000	338000000	333810000	346350000	0.935972	0.0803044
sp|Q9CYX7|RRP15_MOUSE	sp|Q9CYX7|RRP15_MOUSE	sp|Q9CYX7|RRP15_MOUSE RRP15-like protein OS=Mus musculus OX=10090 GN=Rrp15 PE=1 SV=2	Q9CYX7	Rrp15	RRP15-like protein (Ribosomal RNA-processing protein 15)	1	7	7	21.4	31.058	122590000	113700000	120300000	150660000	134110000	125930000	1.15174	0.0804033
tr|Q3UJA1|Q3UJA1_MOUSE;sp|Q6P5B0|RRP12_MOUSE	tr|Q3UJA1|Q3UJA1_MOUSE;sp|Q6P5B0|RRP12_MOUSE	tr|Q3UJA1|Q3UJA1_MOUSE Uncharacterized protein OS=Mus musculus OX=10090 GN=Rrp12 PE=1 SV=1;sp|Q6P5B0|RRP12_MOUSE RRP12-like protein OS=Mus musculus OX=10090 GN=Rrp12 PE=1 SV=1	Q3UJA1	Rrp12 AA408556	NUC173 domain-containing protein	2	45	45	40.6	143.13	801980000	781610000	746740000	835420000	799110000	840950000	1.06229	0.0805196
tr|Q3TX21|Q3TX21_MOUSE;sp|P18406|CYR61_MOUSE	tr|Q3TX21|Q3TX21_MOUSE;sp|P18406|CYR61_MOUSE	tr|Q3TX21|Q3TX21_MOUSE Cysteine rich protein 61 OS=Mus musculus OX=10090 GN=Ccn1 PE=2 SV=1;sp|P18406|CYR61_MOUSE Protein CYR61 OS=Mus musculus OX=10090 GN=Cyr61 PE=1 SV=1	Q3TX21	Ccn1 Cyr61 mCG_7789	Cysteine rich protein 61	2	5	5	16.4	41.709	13109000	13585000	NaN	14123000	NaN	14412000	1.06897	0.0805883
tr|Q5SVX3|Q5SVX3_MOUSE;sp|Q9D0R4|DDX56_MOUSE;tr|Q8BK66|Q8BK66_MOUSE;tr|Q5SVX2|Q5SVX2_MOUSE	tr|Q5SVX3|Q5SVX3_MOUSE;sp|Q9D0R4|DDX56_MOUSE;tr|Q8BK66|Q8BK66_MOUSE;tr|Q5SVX2|Q5SVX2_MOUSE	tr|Q5SVX3|Q5SVX3_MOUSE DEAD (Asp-Glu-Ala-Asp) box polypeptide 56 OS=Mus musculus OX=10090 GN=Ddx56 PE=2 SV=1;sp|Q9D0R4|DDX56_MOUSE Probable ATP-dependent RNA helicase DDX56 OS=Mus musculus OX=10090 GN=Ddx56 PE=2 SV=1;tr|Q8BK66|Q8BK66_MOUSE Uncharacterized	Q5SVX3	Ddx56 mCG_21395	DEAD (Asp-Glu-Ala-Asp) box polypeptide 56	4	21	21	48	61.211	422930000	432090000	371860000	341980000	381080000	348240000	0.873191	0.0808151
tr|Q4VA93|Q4VA93_MOUSE;sp|P20444|KPCA_MOUSE;tr|Q3TQ39|Q3TQ39_MOUSE;tr|Q9R0Z6|Q9R0Z6_MOUSE	tr|Q4VA93|Q4VA93_MOUSE;sp|P20444|KPCA_MOUSE	tr|Q4VA93|Q4VA93_MOUSE Protein kinase C OS=Mus musculus OX=10090 GN=Prkca PE=1 SV=1;sp|P20444|KPCA_MOUSE Protein kinase C alpha type OS=Mus musculus OX=10090 GN=Prkca PE=1 SV=3	Q4VA93	Prkca mCG_140727	Protein kinase C (EC 2.7.11.13)	4	13	10	20.1	76.823	168890000	152890000	120050000	108830000	106110000	121500000	0.761469	0.081072
tr|Q3UGJ5|Q3UGJ5_MOUSE;sp|Q60790|RASA3_MOUSE;tr|Q8C6G4|Q8C6G4_MOUSE;sp|P58069|RASA2_MOUSE;tr|Q3U405|Q3U405_MOUSE	tr|Q3UGJ5|Q3UGJ5_MOUSE;sp|Q60790|RASA3_MOUSE	tr|Q3UGJ5|Q3UGJ5_MOUSE Uncharacterized protein OS=Mus musculus OX=10090 GN=Rasa3 PE=2 SV=1;sp|Q60790|RASA3_MOUSE Ras GTPase-activating protein 3 OS=Mus musculus OX=10090 GN=Rasa3 PE=1 SV=2	Q3UGJ5	Rasa3	Uncharacterized protein	5	16	16	27.8	95.914	132130000	146590000	135550000	129200000	126140000	113090000	0.889348	0.0812771
sp|O08528|HXK2_MOUSE;tr|E9Q5B5|E9Q5B5_MOUSE;tr|E9Q9M6|E9Q9M6_MOUSE;tr|Q3TCB2|Q3TCB2_MOUSE;tr|E9Q3Z4|E9Q3Z4_MOUSE;tr|Q08EC2|Q08EC2_MOUSE;tr|E9Q8S8|E9Q8S8_MOUSE;tr|Q3TVQ4|Q3TVQ4_MOUSE;tr|Q3TQE0|Q3TQE0_MOUSE;tr|Q3TBG9|Q3TBG9_MOUSE;tr|Q149C8|Q149C8_MOUSE;sp|Q3TRM8|HXK3_MOUSE	sp|O08528|HXK2_MOUSE;tr|E9Q5B5|E9Q5B5_MOUSE	sp|O08528|HXK2_MOUSE Hexokinase-2 OS=Mus musculus OX=10090 GN=Hk2 PE=1 SV=1;tr|E9Q5B5|E9Q5B5_MOUSE Hexokinase-2 OS=Mus musculus OX=10090 GN=Hk2 PE=1 SV=1	O08528	Hk2	Hexokinase-2 (EC 2.7.1.1) (Hexokinase type II) (HK II)	12	42	38	52.5	102.53	1523200000	1447200000	1469400000	1443100000	1412900000	1411500000	0.961192	0.081554
tr|Q58E29|Q58E29_MOUSE;tr|Q0VEW4|Q0VEW4_MOUSE;sp|Q9R1Q7|PLP2_MOUSE	tr|Q58E29|Q58E29_MOUSE;tr|Q0VEW4|Q0VEW4_MOUSE;sp|Q9R1Q7|PLP2_MOUSE	tr|Q58E29|Q58E29_MOUSE Proteolipid protein 2 OS=Mus musculus OX=10090 GN=Plp2 PE=2 SV=1;tr|Q0VEW4|Q0VEW4_MOUSE Proteolipid protein 2 OS=Mus musculus OX=10090 GN=Plp2 PE=1 SV=1;sp|Q9R1Q7|PLP2_MOUSE Proteolipid protein 2 OS=Mus musculus OX=10090 GN=Plp2 PE=1	Q58E29	Plp2	Proteolipid protein 2	3	2	2	17.8	16.671	399780000	472170000	404750000	NaN	355520000	335370000	0.811729	0.0818141
sp|P01027|CO3_MOUSE;CON__Q2UVX4	sp|P01027|CO3_MOUSE	sp|P01027|CO3_MOUSE Complement C3 OS=Mus musculus OX=10090 GN=C3 PE=1 SV=3	P01027	C3	Complement C3 (HSE-MSF) [Cleaved into: Complement C3 beta chain; C3-beta-c (C3bc); Complement C3 alpha chain; C3a anaphylatoxin; Acylation stimulating protein (ASP) (C3adesArg); Complement C3b alpha' chain; Complement C3c alpha' chain fragment 1; Complement C3dg fragment; Complement C3g fragment; Complement C3d fragment; Complement C3f fragment; Complement C3c alpha' chain fragment 2]	2	11	11	8.4	186.48	36926000	24836000	36151000	44871000	39011000	43881000	1.30486	0.0819931
tr|D3YZ00|D3YZ00_MOUSE;sp|P70257|NFIX_MOUSE;tr|E9PUH7|E9PUH7_MOUSE;tr|Q5CZY4|Q5CZY4_MOUSE;tr|B1AUB6|B1AUB6_MOUSE;tr|B1AUB8|B1AUB8_MOUSE;tr|Q69ZJ5|Q69ZJ5_MOUSE;tr|Q05B39|Q05B39_MOUSE;tr|B1AUB9|B1AUB9_MOUSE;tr|Q6DI81|Q6DI81_MOUSE;tr|B1AUC0|B1AUC0_MOUSE;tr|Q3UTK6|Q3UTK6_MOUSE;sp|Q02780|NFIA_MOUSE	tr|D3YZ00|D3YZ00_MOUSE;sp|P70257|NFIX_MOUSE;tr|E9PUH7|E9PUH7_MOUSE;tr|Q5CZY4|Q5CZY4_MOUSE	tr|D3YZ00|D3YZ00_MOUSE Nuclear factor 1 (Fragment) OS=Mus musculus OX=10090 GN=Nfix PE=1 SV=1;sp|P70257|NFIX_MOUSE Nuclear factor 1 X-type OS=Mus musculus OX=10090 GN=Nfix PE=1 SV=2;tr|E9PUH7|E9PUH7_MOUSE Nuclear factor 1 OS=Mus musculus OX=10090 GN=Nfix P	D3YZ00	Nfix	Nuclear factor 1 (Fragment)	13	8	2	24.4	53.414	37771000	42569000	38346000	35718000	30912000	36274000	0.867027	0.0820207
tr|Q6P5I1|Q6P5I1_MOUSE;sp|Q9DCT5|SDF2_MOUSE;tr|A0A0R4IZW9|A0A0R4IZW9_MOUSE;tr|Q5I0W5|Q5I0W5_MOUSE	tr|Q6P5I1|Q6P5I1_MOUSE;sp|Q9DCT5|SDF2_MOUSE;tr|A0A0R4IZW9|A0A0R4IZW9_MOUSE;tr|Q5I0W5|Q5I0W5_MOUSE	tr|Q6P5I1|Q6P5I1_MOUSE Stromal cell derived factor 2 OS=Mus musculus OX=10090 GN=Sdf2 PE=2 SV=2;sp|Q9DCT5|SDF2_MOUSE Stromal cell-derived factor 2 OS=Mus musculus OX=10090 GN=Sdf2 PE=1 SV=1;tr|A0A0R4IZW9|A0A0R4IZW9_MOUSE Stromal cell-derived factor 2 OS=Mu	Q6P5I1	Sdf2	Stromal cell derived factor 2	4	5	5	39.8	23.159	148650000	158020000	155000000	126910000	150330000	130330000	0.882817	0.0820748
tr|Q8BZZ0|Q8BZZ0_MOUSE;tr|A0A1B0GR08|A0A1B0GR08_MOUSE;tr|Q3UIT6|Q3UIT6_MOUSE;tr|Q3TIB7|Q3TIB7_MOUSE;sp|Q921G8|GCP2_MOUSE;tr|A0A1B0GRD4|A0A1B0GRD4_MOUSE;tr|A0A1B0GRD0|A0A1B0GRD0_MOUSE	tr|Q8BZZ0|Q8BZZ0_MOUSE;tr|A0A1B0GR08|A0A1B0GR08_MOUSE;tr|Q3UIT6|Q3UIT6_MOUSE;tr|Q3TIB7|Q3TIB7_MOUSE;sp|Q921G8|GCP2_MOUSE;tr|A0A1B0GRD4|A0A1B0GRD4_MOUSE;tr|A0A1B0GRD0|A0A1B0GRD0_MOUSE	tr|Q8BZZ0|Q8BZZ0_MOUSE Gamma-tubulin complex component OS=Mus musculus OX=10090 GN=Tubgcp2 PE=2 SV=1;tr|A0A1B0GR08|A0A1B0GR08_MOUSE Gamma-tubulin complex component (Fragment) OS=Mus musculus OX=10090 GN=Tubgcp2 PE=1 SV=1;tr|Q3UIT6|Q3UIT6_MOUSE Gamma-tubuli	Q8BZZ0	Tubgcp2	Gamma-tubulin complex component	7	2	2	3.4	77.335	26989000	20959000	22250000	16645000	20833000	13990000	0.733183	0.08236
tr|Q547B5|Q547B5_MOUSE;sp|P10923|OSTP_MOUSE;tr|F8WIP8|F8WIP8_MOUSE;tr|Q3UZY3|Q3UZY3_MOUSE;tr|Q3UBR1|Q3UBR1_MOUSE;tr|Q3TND2|Q3TND2_MOUSE;tr|Q66JX3|Q66JX3_MOUSE;tr|Q3TLP1|Q3TLP1_MOUSE;tr|D3Z4N2|D3Z4N2_MOUSE;tr|D3Z513|D3Z513_MOUSE	tr|Q547B5|Q547B5_MOUSE;sp|P10923|OSTP_MOUSE;tr|F8WIP8|F8WIP8_MOUSE;tr|Q3UZY3|Q3UZY3_MOUSE;tr|Q3UBR1|Q3UBR1_MOUSE;tr|Q3TND2|Q3TND2_MOUSE;tr|Q66JX3|Q66JX3_MOUSE;tr|Q3TLP1|Q3TLP1_MOUSE	tr|Q547B5|Q547B5_MOUSE Osteopontin OS=Mus musculus OX=10090 GN=Spp1 PE=1 SV=1;sp|P10923|OSTP_MOUSE Osteopontin OS=Mus musculus OX=10090 GN=Spp1 PE=1 SV=1;tr|F8WIP8|F8WIP8_MOUSE Osteopontin OS=Mus musculus OX=10090 GN=Spp1 PE=1 SV=1;tr|Q3UZY3|Q3UZY3_MOUSE U	Q547B5	Spp1 OPN mCG_14598	Osteopontin (Secreted phosphoprotein 1, isoform CRA_a) (Secreted phosphoprotein 1, isoform CRA_b) (Spp1 protein)	10	8	8	48.3	32.459	279070000	267790000	249170000	197640000	234290000	246290000	0.852003	0.0824324
sp|Q9CR02|TMA16_MOUSE	sp|Q9CR02|TMA16_MOUSE	sp|Q9CR02|TMA16_MOUSE Translation machinery-associated protein 16 OS=Mus musculus OX=10090 GN=Tma16 PE=1 SV=1	Q9CR02	Tma16	Translation machinery-associated protein 16	1	5	5	29.4	25.782	39424000	42166000	36677000	45118000	41684000	47602000	1.13645	0.0826492
tr|Q3U9G2|Q3U9G2_MOUSE;sp|P20029|BIP_MOUSE;tr|Q3TWF2|Q3TWF2_MOUSE;tr|Q3TKF8|Q3TKF8_MOUSE;tr|Q3TI47|Q3TI47_MOUSE;tr|Q9DC41|Q9DC41_MOUSE;tr|Q3U7T8|Q3U7T8_MOUSE;tr|Q3U6V3|Q3U6V3_MOUSE;tr|Q3UEM8|Q3UEM8_MOUSE;tr|Q3TUS2|Q3TUS2_MOUSE;tr|O88687|O88687_MOUSE	tr|Q3U9G2|Q3U9G2_MOUSE;sp|P20029|BIP_MOUSE;tr|Q3TWF2|Q3TWF2_MOUSE;tr|Q3TKF8|Q3TKF8_MOUSE;tr|Q3TI47|Q3TI47_MOUSE;tr|Q9DC41|Q9DC41_MOUSE;tr|Q3U7T8|Q3U7T8_MOUSE;tr|Q3U6V3|Q3U6V3_MOUSE;tr|Q3UEM8|Q3UEM8_MOUSE	tr|Q3U9G2|Q3U9G2_MOUSE Uncharacterized protein OS=Mus musculus OX=10090 GN=Hspa5 PE=2 SV=1;sp|P20029|BIP_MOUSE Endoplasmic reticulum chaperone BiP OS=Mus musculus OX=10090 GN=Hspa5 PE=1 SV=3;tr|Q3TWF2|Q3TWF2_MOUSE Uncharacterized protein OS=Mus musculus OX	Q3U9G2	Hspa5	Uncharacterized protein	11	49	47	58.3	72.405	39210000000	38908000000	38044000000	38114000000	37064000000	37766000000	0.972297	0.0828997
tr|B1B1D8|B1B1D8_MOUSE;sp|Q9D773|RM02_MOUSE;tr|B1B1D7|B1B1D7_MOUSE	tr|B1B1D8|B1B1D8_MOUSE;sp|Q9D773|RM02_MOUSE;tr|B1B1D7|B1B1D7_MOUSE	tr|B1B1D8|B1B1D8_MOUSE 39S ribosomal protein L2, mitochondrial OS=Mus musculus OX=10090 GN=Mrpl2 PE=1 SV=1;sp|Q9D773|RM02_MOUSE 39S ribosomal protein L2, mitochondrial OS=Mus musculus OX=10090 GN=Mrpl2 PE=1 SV=1;tr|B1B1D7|B1B1D7_MOUSE 39S ribosomal protein	B1B1D8	Mrpl2	39S ribosomal protein L2, mitochondrial	3	5	5	21.1	33.099	50301000	41430000	40949000	69950000	55025000	51702000	1.3316	0.0831291
tr|E9Q317|E9Q317_MOUSE;tr|Q4FZH3|Q4FZH3_MOUSE;sp|O55128|SAP18_MOUSE;tr|D3Z2N9|D3Z2N9_MOUSE;tr|D3YY73|D3YY73_MOUSE;tr|D3YY55|D3YY55_MOUSE	tr|E9Q317|E9Q317_MOUSE;tr|Q4FZH3|Q4FZH3_MOUSE;sp|O55128|SAP18_MOUSE;tr|D3Z2N9|D3Z2N9_MOUSE	tr|E9Q317|E9Q317_MOUSE Histone deacetylase complex subunit SAP18 OS=Mus musculus OX=10090 GN=Sap18 PE=1 SV=1;tr|Q4FZH3|Q4FZH3_MOUSE Histone deacetylase complex subunit SAP18 OS=Mus musculus OX=10090 GN=Sap18 PE=2 SV=1;sp|O55128|SAP18_MOUSE Histone deacetyl	E9Q317	Sap18 Sap18b	Histone deacetylase complex subunit SAP18 (Sin3-associated polypeptide 18B)	6	11	11	57.6	19.586	811870000	893920000	743870000	668560000	745760000	698760000	0.862601	0.0832374
tr|E9QAK6|E9QAK6_MOUSE;tr|Q6PAQ8|Q6PAQ8_MOUSE;tr|Q3UFP5|Q3UFP5_MOUSE;tr|E9PZ73|E9PZ73_MOUSE;tr|Q80W05|Q80W05_MOUSE;sp|P30051|TEAD1_MOUSE;tr|Q3USK5|Q3USK5_MOUSE;tr|E9Q387|E9Q387_MOUSE;tr|E9PVS2|E9PVS2_MOUSE;tr|F6TTJ9|F6TTJ9_MOUSE;sp|P70210|TEAD3_MOUSE;tr|Q9Z0P8|Q9Z0P8_MOUSE;tr|F8VPU0|F8VPU0_MOUSE;tr|Q8VCA7|Q8VCA7_MOUSE;tr|F6QH05|F6QH05_MOUSE;tr|A0A3F2YNR7|A0A3F2YNR7_MOUSE;tr|Q9ERV9|Q9ERV9_MOUSE;tr…	tr|E9QAK6|E9QAK6_MOUSE;tr|Q6PAQ8|Q6PAQ8_MOUSE;tr|Q3UFP5|Q3UFP5_MOUSE;tr|E9PZ73|E9PZ73_MOUSE;tr|Q80W05|Q80W05_MOUSE;sp|P30051|TEAD1_MOUSE;tr|Q3USK5|Q3USK5_MOUSE;tr|E9Q387|E9Q387_MOUSE;tr|E9PVS2|E9PVS2_MOUSE;tr|F6TTJ9|F6TTJ9_MOUSE;sp|P70210|TEAD3_MOUSE;tr|Q9Z0P8|Q9Z0P8_MOUSE;tr|F8VPU0|F8VPU0_MOUSE;tr|Q8VCA7|Q8VCA7_MOUSE;tr|F6QH05|F6QH05_MOUSE;tr|A0A3F2YNR7|A0A3F2YNR7_MOUSE	tr|E9QAK6|E9QAK6_MOUSE Transcriptional enhancer factor TEF-1 OS=Mus musculus OX=10090 GN=Tead1 PE=1 SV=1;tr|Q6PAQ8|Q6PAQ8_MOUSE Tead1 protein OS=Mus musculus OX=10090 GN=Tead1 PE=1 SV=1;tr|Q3UFP5|Q3UFP5_MOUSE TEA domain family member 1, isoform CRA_a OS=Mu	E9QAK6	Tead1	Transcriptional enhancer factor TEF-1	31	8	8	27.2	40.001	72707000	68776000	61996000	89536000	77207000	74807000	1.1871	0.0834897
sp|Q9D287|SPF27_MOUSE;tr|Q3U5M2|Q3U5M2_MOUSE;tr|Q05CL7|Q05CL7_MOUSE;tr|D6RGA5|D6RGA5_MOUSE;tr|D6RHR7|D6RHR7_MOUSE	sp|Q9D287|SPF27_MOUSE;tr|Q3U5M2|Q3U5M2_MOUSE;tr|Q05CL7|Q05CL7_MOUSE	sp|Q9D287|SPF27_MOUSE Pre-mRNA-splicing factor SPF27 OS=Mus musculus OX=10090 GN=Bcas2 PE=1 SV=1;tr|Q3U5M2|Q3U5M2_MOUSE Uncharacterized protein OS=Mus musculus OX=10090 GN=Bcas2 PE=2 SV=1;tr|Q05CL7|Q05CL7_MOUSE Bcas2 protein OS=Mus musculus OX=10090 GN=Bca	Q9D287	Bcas2 Dam1	Pre-mRNA-splicing factor SPF27 (Breast carcinoma-amplified sequence 2 homolog) (DNA amplified in mammary carcinoma 1 protein)	5	13	13	80.9	26.131	448980000	477690000	471100000	495520000	478450000	494790000	1.05079	0.0835214
sp|Q9D2R6|COA3_MOUSE;tr|E9Q6W2|E9Q6W2_MOUSE	sp|Q9D2R6|COA3_MOUSE;tr|E9Q6W2|E9Q6W2_MOUSE	sp|Q9D2R6|COA3_MOUSE Cytochrome c oxidase assembly factor 3 homolog, mitochondrial OS=Mus musculus OX=10090 GN=Coa3 PE=1 SV=1;tr|E9Q6W2|E9Q6W2_MOUSE Cytochrome c oxidase assembly factor 3 homolog, mitochondrial OS=Mus musculus OX=10090 GN=Coa3 PE=1 SV=1	Q9D2R6	Coa3 Ccdc56	Cytochrome c oxidase assembly factor 3 homolog, mitochondrial (Coiled-coil domain-containing protein 56)	2	4	4	38	11.987	61439000	61074000	64510000	58414000	60813000	58635000	0.951017	0.0835633
tr|A0A087WNV1|A0A087WNV1_MOUSE;tr|A0A087WSR7|A0A087WSR7_MOUSE;sp|Q8K2K6|AGFG1_MOUSE;tr|A0A087WR52|A0A087WR52_MOUSE;tr|A0A087WRL1|A0A087WRL1_MOUSE	tr|A0A087WNV1|A0A087WNV1_MOUSE;tr|A0A087WSR7|A0A087WSR7_MOUSE;sp|Q8K2K6|AGFG1_MOUSE;tr|A0A087WR52|A0A087WR52_MOUSE;tr|A0A087WRL1|A0A087WRL1_MOUSE	tr|A0A087WNV1|A0A087WNV1_MOUSE Arf-GAP domain and FG repeat-containing protein 1 OS=Mus musculus OX=10090 GN=Agfg1 PE=1 SV=1;tr|A0A087WSR7|A0A087WSR7_MOUSE Arf-GAP domain and FG repeat-containing protein 1 OS=Mus musculus OX=10090 GN=Agfg1 PE=1 SV=1;sp|Q8K	A0A087WNV1	Agfg1	Arf-GAP domain and FG repeat-containing protein 1	5	5	5	18	53.974	36489000	42793000	43647000	45105000	55242000	48342000	1.20955	0.0836388
tr|Q5SX53|Q5SX53_MOUSE;sp|Q9CR62|M2OM_MOUSE;tr|Q9CTC7|Q9CTC7_MOUSE;tr|Q5SX46|Q5SX46_MOUSE;tr|Q5SX48|Q5SX48_MOUSE	tr|Q5SX53|Q5SX53_MOUSE;sp|Q9CR62|M2OM_MOUSE;tr|Q9CTC7|Q9CTC7_MOUSE;tr|Q5SX46|Q5SX46_MOUSE	tr|Q5SX53|Q5SX53_MOUSE Solute carrier family 25 (Mitochondrial carrier oxoglutarate carrier), member 11, isoform CRA_b OS=Mus musculus OX=10090 GN=Slc25a11 PE=1 SV=1;sp|Q9CR62|M2OM_MOUSE Mitochondrial 2-oxoglutarate/malate carrier protein OS=Mus musculus O	Q5SX53	Slc25a11 mCG_21174	Solute carrier family 25 (Mitochondrial carrier oxoglutarate carrier), member 11, isoform CRA_b	5	15	15	52.5	34.155	549640000	507370000	504250000	493830000	477810000	484240000	0.932503	0.0841437
sp|Q02614|S30BP_MOUSE	sp|Q02614|S30BP_MOUSE	sp|Q02614|S30BP_MOUSE SAP30-binding protein OS=Mus musculus OX=10090 GN=Sap30bp PE=1 SV=2	Q02614	Sap30bp Hcngp	SAP30-binding protein (Transcriptional regulator protein HCNGP)	1	6	6	19.5	33.832	36839000	34831000	40443000	43694000	61155000	79960000	1.64842	0.0842121
tr|A1L0V4|A1L0V4_MOUSE;sp|P68433|H31_MOUSE	tr|A1L0V4|A1L0V4_MOUSE;sp|P68433|H31_MOUSE	tr|A1L0V4|A1L0V4_MOUSE Histone H3 (Fragment) OS=Mus musculus OX=10090 GN=Hist1h3i PE=2 SV=1;sp|P68433|H31_MOUSE Histone H3.1 OS=Mus musculus OX=10090 GN=Hist1h3a PE=1 SV=2	A1L0V4	Hist1h3i	Histone H3 (Fragment)	2	9	1	56.3	15.273	21336000000	22623000000	19085000000	18980000000	18305000000	18554000000	0.885715	0.0846136
tr|Q542A1|Q542A1_MOUSE;sp|Q61334|BAP29_MOUSE	tr|Q542A1|Q542A1_MOUSE;sp|Q61334|BAP29_MOUSE	tr|Q542A1|Q542A1_MOUSE Uncharacterized protein OS=Mus musculus OX=10090 GN=Bcap29 PE=1 SV=1;sp|Q61334|BAP29_MOUSE B-cell receptor-associated protein 29 OS=Mus musculus OX=10090 GN=Bcap29 PE=1 SV=1	Q542A1	Bcap29	Uncharacterized protein	2	7	7	22.9	27.964	167460000	190070000	163720000	153020000	138150000	159320000	0.864249	0.0849053
sp|Q63918|CAVN2_MOUSE	sp|Q63918|CAVN2_MOUSE	sp|Q63918|CAVN2_MOUSE Caveolae-associated protein 2 OS=Mus musculus OX=10090 GN=Cavin2 PE=1 SV=3	Q63918	Cavin2 Sdpr Sdr	Caveolae-associated protein 2 (Cavin-2) (Phosphatidylserine-binding protein) (Serum deprivation-response protein)	1	7	7	34.7	46.763	76912000	86808000	88033000	91943000	104130000	92180000	1.14498	0.0851876
tr|Q9JL30|Q9JL30_MOUSE;tr|Q544T4|Q544T4_MOUSE;tr|Q3UU61|Q3UU61_MOUSE;sp|P54751|SIA4A_MOUSE	tr|Q9JL30|Q9JL30_MOUSE;tr|Q544T4|Q544T4_MOUSE;tr|Q3UU61|Q3UU61_MOUSE;sp|P54751|SIA4A_MOUSE	tr|Q9JL30|Q9JL30_MOUSE ST3GAL-I sialyltransferase (Fragment) OS=Mus musculus OX=10090 GN=St3gal-1 PE=3 SV=1;tr|Q544T4|Q544T4_MOUSE ST3 beta-galactoside alpha-2,3-sialyltransferase 1 OS=Mus musculus OX=10090 GN=St3gal1 PE=2 SV=1;tr|Q3UU61|Q3UU61_MOUSE Uncha	Q9JL30	St3gal-1	ST3GAL-I sialyltransferase (Fragment)	4	5	5	30.4	26.099	147510000	140590000	124880000	152600000	150590000	157770000	1.11618	0.0852007
sp|Q9CWG8|NDUF7_MOUSE;tr|A0A3B2WD93|A0A3B2WD93_MOUSE;tr|Q78HN8|Q78HN8_MOUSE;tr|A2VCR6|A2VCR6_MOUSE;tr|A0A3B2WD28|A0A3B2WD28_MOUSE	sp|Q9CWG8|NDUF7_MOUSE;tr|A0A3B2WD93|A0A3B2WD93_MOUSE	sp|Q9CWG8|NDUF7_MOUSE Protein arginine methyltransferase NDUFAF7, mitochondrial OS=Mus musculus OX=10090 GN=Ndufaf7 PE=1 SV=4;tr|A0A3B2WD93|A0A3B2WD93_MOUSE Protein arginine methyltransferase NDUFAF7 (Fragment) OS=Mus musculus OX=10090 GN=Ndufaf7 PE=1 SV=1	Q9CWG8	Ndufaf7	Protein arginine methyltransferase NDUFAF7, mitochondrial (EC 2.1.1.320) (NADH dehydrogenase [ubiquinone] complex I, assembly factor 7) (Protein midA homolog)	5	8	8	23.4	48.384	57922000	55324000	51649000	56995000	68251000	66609000	1.1635	0.0854681
sp|Q3TXS7|PSMD1_MOUSE;tr|Q8BU34|Q8BU34_MOUSE;tr|Q8CGG2|Q8CGG2_MOUSE;tr|Q05CG9|Q05CG9_MOUSE;tr|Q8CGI9|Q8CGI9_MOUSE;tr|Q5HZG6|Q5HZG6_MOUSE;tr|A0JLU3|A0JLU3_MOUSE;tr|J3QN38|J3QN38_MOUSE;tr|D6RGR5|D6RGR5_MOUSE	sp|Q3TXS7|PSMD1_MOUSE;tr|Q8BU34|Q8BU34_MOUSE;tr|Q8CGG2|Q8CGG2_MOUSE;tr|Q05CG9|Q05CG9_MOUSE;tr|Q8CGI9|Q8CGI9_MOUSE;tr|Q5HZG6|Q5HZG6_MOUSE	sp|Q3TXS7|PSMD1_MOUSE 26S proteasome non-ATPase regulatory subunit 1 OS=Mus musculus OX=10090 GN=Psmd1 PE=1 SV=1;tr|Q8BU34|Q8BU34_MOUSE Uncharacterized protein (Fragment) OS=Mus musculus OX=10090 GN=Psmd1 PE=2 SV=2;tr|Q8CGG2|Q8CGG2_MOUSE Psmd1 protein (Fra	Q3TXS7	Psmd1	26S proteasome non-ATPase regulatory subunit 1 (26S proteasome regulatory subunit RPN2) (26S proteasome regulatory subunit S1)	9	29	29	41.9	105.73	270510000	259070000	375330000	408550000	387120000	371640000	1.28997	0.0856128
tr|A0A0R4J2B6|A0A0R4J2B6_MOUSE;sp|Q8BX09|RBBP5_MOUSE;tr|A0A087WST2|A0A087WST2_MOUSE;tr|A0A087WQU2|A0A087WQU2_MOUSE;tr|A0A087WRV7|A0A087WRV7_MOUSE	tr|A0A0R4J2B6|A0A0R4J2B6_MOUSE;sp|Q8BX09|RBBP5_MOUSE;tr|A0A087WST2|A0A087WST2_MOUSE	tr|A0A0R4J2B6|A0A0R4J2B6_MOUSE Retinoblastoma-binding protein 5 OS=Mus musculus OX=10090 GN=Rbbp5 PE=1 SV=1;sp|Q8BX09|RBBP5_MOUSE Retinoblastoma-binding protein 5 OS=Mus musculus OX=10090 GN=Rbbp5 PE=1 SV=2;tr|A0A087WST2|A0A087WST2_MOUSE Retinoblastoma-bin	A0A0R4J2B6	Rbbp5	Retinoblastoma-binding protein 5	5	7	7	19	59.026	43455000	50552000	51330000	58200000	58368000	51605000	1.15712	0.0856454
tr|Q3UHH5|Q3UHH5_MOUSE;sp|P21279|GNAQ_MOUSE	tr|Q3UHH5|Q3UHH5_MOUSE;sp|P21279|GNAQ_MOUSE	tr|Q3UHH5|Q3UHH5_MOUSE Uncharacterized protein OS=Mus musculus OX=10090 GN=Gnaq PE=1 SV=1;sp|P21279|GNAQ_MOUSE Guanine nucleotide-binding protein G(q) subunit alpha OS=Mus musculus OX=10090 GN=Gnaq PE=1 SV=4	Q3UHH5	Gnaq	Uncharacterized protein	2	12	6	36.5	42.158	61512000	65707000	61491000	55765000	61173000	57198000	0.92277	0.0857721
sp|P60335|PCBP1_MOUSE	sp|P60335|PCBP1_MOUSE	sp|P60335|PCBP1_MOUSE Poly(rC)-binding protein 1 OS=Mus musculus OX=10090 GN=Pcbp1 PE=1 SV=1	P60335	Pcbp1	Poly(rC)-binding protein 1 (Alpha-CP1) (Heterogeneous nuclear ribonucleoprotein E1) (hnRNP E1)	1	17	12	76.4	37.497	2075300000	1958600000	2039300000	1952200000	1846600000	1944600000	0.945696	0.0857894
tr|Q5SSP3|Q5SSP3_MOUSE;tr|Q9ESU8|Q9ESU8_MOUSE;tr|Q8BXT5|Q8BXT5_MOUSE;tr|Q3UTP8|Q3UTP8_MOUSE;tr|Q3US35|Q3US35_MOUSE;sp|O35874|SATT_MOUSE	tr|Q5SSP3|Q5SSP3_MOUSE;tr|Q9ESU8|Q9ESU8_MOUSE;tr|Q8BXT5|Q8BXT5_MOUSE;tr|Q3UTP8|Q3UTP8_MOUSE;tr|Q3US35|Q3US35_MOUSE;sp|O35874|SATT_MOUSE	tr|Q5SSP3|Q5SSP3_MOUSE Neutral amino acid transporter A OS=Mus musculus OX=10090 GN=Slc1a4 PE=1 SV=1;tr|Q9ESU8|Q9ESU8_MOUSE Neutral amino acid transporter ASCT1 OS=Mus musculus OX=10090 GN=Slc1a4 PE=2 SV=1;tr|Q8BXT5|Q8BXT5_MOUSE Uncharacterized protein OS=	Q5SSP3	Slc1a4	Neutral amino acid transporter A	6	3	3	13.5	47.666	42004000	41886000	37400000	35765000	32950000	38112000	0.880757	0.0860257
tr|Q61935|Q61935_MOUSE;tr|A0A087WRZ7|A0A087WRZ7_MOUSE;tr|A0A0G2JDM3|A0A0G2JDM3_MOUSE;tr|Q545G5|Q545G5_MOUSE;tr|E9PWG4|E9PWG4_MOUSE;tr|Q6PCW9|Q6PCW9_MOUSE;tr|A0A0G2JDW2|A0A0G2JDW2_MOUSE;tr|Q545T7|Q545T7_MOUSE;sp|P05977|MYL1_MOUSE;sp|P09542|MYL3_MOUSE	tr|Q61935|Q61935_MOUSE;tr|A0A087WRZ7|A0A087WRZ7_MOUSE;tr|A0A0G2JDM3|A0A0G2JDM3_MOUSE;tr|Q545G5|Q545G5_MOUSE;tr|E9PWG4|E9PWG4_MOUSE;tr|Q6PCW9|Q6PCW9_MOUSE;tr|A0A0G2JDW2|A0A0G2JDW2_MOUSE;tr|Q545T7|Q545T7_MOUSE;sp|P05977|MYL1_MOUSE;sp|P09542|MYL3_MOUSE	tr|Q61935|Q61935_MOUSE Ventricular alkali myosin light chain (Fragment) OS=Mus musculus OX=10090 GN=Myl3 PE=2 SV=1;tr|A0A087WRZ7|A0A087WRZ7_MOUSE Myosin light chain 1/3, skeletal muscle isoform OS=Mus musculus OX=10090 GN=Myl1 PE=1 SV=1;tr|A0A0G2JDM3|A0A0G	Q61935	Myl3 Mylc	Ventricular alkali myosin light chain (Fragment)	10	2	2	27.1	6.5243	74480000	NaN	68052000	83415000	88359000	103390000	1.28703	0.0861438
tr|Q3TW82|Q3TW82_MOUSE;sp|P12265|BGLR_MOUSE;tr|Q8VEM0|Q8VEM0_MOUSE;tr|Q8BPE3|Q8BPE3_MOUSE;tr|Q99KJ6|Q99KJ6_MOUSE;tr|D3YY48|D3YY48_MOUSE	tr|Q3TW82|Q3TW82_MOUSE;sp|P12265|BGLR_MOUSE	tr|Q3TW82|Q3TW82_MOUSE Beta-glucuronidase OS=Mus musculus OX=10090 GN=Gusb PE=2 SV=1;sp|P12265|BGLR_MOUSE Beta-glucuronidase OS=Mus musculus OX=10090 GN=Gusb PE=1 SV=2	Q3TW82	Gusb	Beta-glucuronidase (EC 3.2.1.31)	6	12	12	24.4	74.27	146020000	119590000	144460000	106550000	123470000	112880000	0.836199	0.0861465
sp|Q99LX0|PARK7_MOUSE;tr|A2A813|A2A813_MOUSE;tr|A2A815|A2A815_MOUSE;tr|D3K2X3|D3K2X3_MOUSE;tr|A2A817|A2A817_MOUSE;tr|A2A816|A2A816_MOUSE	sp|Q99LX0|PARK7_MOUSE;tr|A2A813|A2A813_MOUSE;tr|A2A815|A2A815_MOUSE;tr|D3K2X3|D3K2X3_MOUSE;tr|A2A817|A2A817_MOUSE;tr|A2A816|A2A816_MOUSE	sp|Q99LX0|PARK7_MOUSE Protein/nucleic acid deglycase DJ-1 OS=Mus musculus OX=10090 GN=Park7 PE=1 SV=1;tr|A2A813|A2A813_MOUSE Protein/nucleic acid deglycase DJ-1 OS=Mus musculus OX=10090 GN=Park7 PE=1 SV=1;tr|A2A815|A2A815_MOUSE Protein/nucleic acid deglyca	Q99LX0	Park7	Protein/nucleic acid deglycase DJ-1 (EC 3.1.2.-) (EC 3.5.1.-) (EC 3.5.1.124) (Maillard deglycase) (Parkinson disease protein 7 homolog) (Parkinsonism-associated deglycase) (Protein DJ-1) (DJ-1)	6	10	10	66.1	20.021	183640000	187740000	219120000	236300000	231830000	212810000	1.15316	0.0863771
sp|P27048|RSMB_MOUSE;tr|Q3UN87|Q3UN87_MOUSE;sp|P63163|RSMN_MOUSE;tr|O70499|O70499_MOUSE;tr|A0A0G2JGN4|A0A0G2JGN4_MOUSE	sp|P27048|RSMB_MOUSE;tr|Q3UN87|Q3UN87_MOUSE;sp|P63163|RSMN_MOUSE;tr|O70499|O70499_MOUSE;tr|A0A0G2JGN4|A0A0G2JGN4_MOUSE	sp|P27048|RSMB_MOUSE Small nuclear ribonucleoprotein-associated protein B OS=Mus musculus OX=10090 GN=Snrpb PE=1 SV=1;tr|Q3UN87|Q3UN87_MOUSE Small nuclear ribonucleoprotein-associated protein OS=Mus musculus OX=10090 GN=Snrpn PE=2 SV=1;sp|P63163|RSMN_MOUSE	P27048	Snrpb	Small nuclear ribonucleoprotein-associated protein B (snRNP-B) (snRPB) (Sm protein B) (Sm-B) (SmB)	5	8	8	28.1	23.656	1487900000	1508000000	1664900000	1847400000	1871500000	1614600000	1.14433	0.0866365
tr|Q58E49|Q58E49_MOUSE;sp|O09106|HDAC1_MOUSE;tr|Q3TMT1|Q3TMT1_MOUSE	tr|Q58E49|Q58E49_MOUSE;sp|O09106|HDAC1_MOUSE	tr|Q58E49|Q58E49_MOUSE Histone deacetylase OS=Mus musculus OX=10090 GN=Hdac1 PE=2 SV=1;sp|O09106|HDAC1_MOUSE Histone deacetylase 1 OS=Mus musculus OX=10090 GN=Hdac1 PE=1 SV=1	Q58E49	Hdac1	Histone deacetylase (EC 3.5.1.98)	3	16	11	42.9	55.074	730530000	751080000	839660000	854620000	836530000	863430000	1.10051	0.0866389
tr|Q3UJR8|Q3UJR8_MOUSE;sp|Q64152|BTF3_MOUSE	tr|Q3UJR8|Q3UJR8_MOUSE;sp|Q64152|BTF3_MOUSE	tr|Q3UJR8|Q3UJR8_MOUSE Transcription factor BTF3 OS=Mus musculus OX=10090 GN=Btf3 PE=2 SV=1;sp|Q64152|BTF3_MOUSE Transcription factor BTF3 OS=Mus musculus OX=10090 GN=Btf3 PE=1 SV=3	Q3UJR8	Btf3 mCG_114993	Transcription factor BTF3	2	8	8	71	17.699	466730000	554900000	557260000	617510000	574020000	608440000	1.14002	0.0866516
tr|V9GXI7|V9GXI7_MOUSE;sp|Q9CQL4|RM20_MOUSE;tr|Q91YJ4|Q91YJ4_MOUSE;tr|V9GX65|V9GX65_MOUSE	tr|V9GXI7|V9GXI7_MOUSE;sp|Q9CQL4|RM20_MOUSE;tr|Q91YJ4|Q91YJ4_MOUSE	tr|V9GXI7|V9GXI7_MOUSE 39S ribosomal protein L20, mitochondrial OS=Mus musculus OX=10090 GN=Mrpl20 PE=1 SV=1;sp|Q9CQL4|RM20_MOUSE 39S ribosomal protein L20, mitochondrial OS=Mus musculus OX=10090 GN=Mrpl20 PE=1 SV=1;tr|Q91YJ4|Q91YJ4_MOUSE Mrpl20 protein OS	V9GXI7	Mrpl20	39S ribosomal protein L20, mitochondrial	4	5	5	54.5	13.081	59504000	62431000	51497000	50611000	50095000	50574000	0.872273	0.0870071
tr|Q921V3|Q921V3_MOUSE;sp|Q9Z1J3|NFS1_MOUSE;tr|F7CZD1|F7CZD1_MOUSE;tr|F6TXD3|F6TXD3_MOUSE;tr|V9GXS4|V9GXS4_MOUSE;tr|A6QRH3|A6QRH3_MOUSE	tr|Q921V3|Q921V3_MOUSE;sp|Q9Z1J3|NFS1_MOUSE	tr|Q921V3|Q921V3_MOUSE Nitrogen fixation gene 1 (S. cerevisiae) OS=Mus musculus OX=10090 GN=Nfs1 PE=2 SV=1;sp|Q9Z1J3|NFS1_MOUSE Cysteine desulfurase, mitochondrial OS=Mus musculus OX=10090 GN=Nfs1 PE=1 SV=3	Q921V3	Nfs1	Nitrogen fixation gene 1 (S. cerevisiae)	6	15	15	38.3	50.584	240040000	205090000	236410000	210890000	190690000	193570000	0.873243	0.0870339
sp|Q8BTS4|NUP54_MOUSE	sp|Q8BTS4|NUP54_MOUSE	sp|Q8BTS4|NUP54_MOUSE Nuclear pore complex protein Nup54 OS=Mus musculus OX=10090 GN=Nup54 PE=1 SV=1	Q8BTS4	Nup54	Nuclear pore complex protein Nup54 (54 kDa nucleoporin) (Nucleoporin Nup54)	1	15	15	36.5	55.731	239800000	231000000	201330000	199620000	201360000	183930000	0.870233	0.0871121
tr|Q8K0Z5|Q8K0Z5_MOUSE;tr|E9Q5J9|E9Q5J9_MOUSE	tr|Q8K0Z5|Q8K0Z5_MOUSE;tr|E9Q5J9|E9Q5J9_MOUSE	tr|Q8K0Z5|Q8K0Z5_MOUSE Tropomyosin 3, gamma OS=Mus musculus OX=10090 GN=Tpm3 PE=2 SV=1;tr|E9Q5J9|E9Q5J9_MOUSE Tropomyosin alpha-3 chain OS=Mus musculus OX=10090 GN=Tpm3 PE=1 SV=1	Q8K0Z5	Tpm3	Tropomyosin 3, gamma	2	32	0	66.5	33.149	89759000	97572000	103640000	135970000	116960000	104930000	1.22988	0.0871859
sp|Q99KP6|PRP19_MOUSE	sp|Q99KP6|PRP19_MOUSE	sp|Q99KP6|PRP19_MOUSE Pre-mRNA-processing factor 19 OS=Mus musculus OX=10090 GN=Prpf19 PE=1 SV=1	Q99KP6	Prpf19 Prp19 Snev	Pre-mRNA-processing factor 19 (EC 2.3.2.27) (Nuclear matrix protein 200) (PRP19/PSO4 homolog) (RING-type E3 ubiquitin transferase PRP19) (Senescence evasion factor)	1	18	18	58.7	55.238	2010400000	2009000000	2135700000	2141100000	2133600000	2182400000	1.04907	0.0872423
tr|B2RUE8|B2RUE8_MOUSE;tr|A0A0A6YWR8|A0A0A6YWR8_MOUSE;tr|A0A0A6YW53|A0A0A6YW53_MOUSE;tr|B7ZNR9|B7ZNR9_MOUSE;tr|F8VPL5|F8VPL5_MOUSE;tr|Q6ZQ68|Q6ZQ68_MOUSE;tr|A0A0A6YWM8|A0A0A6YWM8_MOUSE;tr|B7ZNR8|B7ZNR8_MOUSE;tr|E9PVG7|E9PVG7_MOUSE;sp|P97820|M4K4_MOUSE;tr|Q3UTY9|Q3UTY9_MOUSE;tr|A0A0A6YWJ2|A0A0A6YWJ2_MOUSE;tr|F7AMS7|F7AMS7_MOUSE;tr|E0CZF8|E0CZF8_MOUSE;tr|E0CZD7|E0CZD7_MOUSE;tr|E0CXD6|E0CXD6_MOUSE;t…	tr|B2RUE8|B2RUE8_MOUSE;tr|A0A0A6YWR8|A0A0A6YWR8_MOUSE;tr|A0A0A6YW53|A0A0A6YW53_MOUSE;tr|B7ZNR9|B7ZNR9_MOUSE;tr|F8VPL5|F8VPL5_MOUSE;tr|Q6ZQ68|Q6ZQ68_MOUSE;tr|A0A0A6YWM8|A0A0A6YWM8_MOUSE;tr|B7ZNR8|B7ZNR8_MOUSE;tr|E9PVG7|E9PVG7_MOUSE;sp|P97820|M4K4_MOUSE	tr|B2RUE8|B2RUE8_MOUSE Map4k4 protein OS=Mus musculus OX=10090 GN=Map4k4 PE=1 SV=1;tr|A0A0A6YWR8|A0A0A6YWR8_MOUSE Mitogen-activated protein kinase kinase kinase kinase 4 OS=Mus musculus OX=10090 GN=Map4k4 PE=1 SV=1;tr|A0A0A6YW53|A0A0A6YW53_MOUSE Mitogen-ac	B2RUE8	Map4k4	Map4k4 protein (Mitogen-activated protein kinase kinase kinase kinase 4)	32	11	11	13.2	139.06	50236000	44029000	49364000	57208000	50590000	54235000	1.12814	0.0875324
tr|Q3TJT6|Q3TJT6_MOUSE;sp|Q5SUC9|SCO1_MOUSE;tr|Q5SUD5|Q5SUD5_MOUSE	tr|Q3TJT6|Q3TJT6_MOUSE;sp|Q5SUC9|SCO1_MOUSE;tr|Q5SUD5|Q5SUD5_MOUSE	tr|Q3TJT6|Q3TJT6_MOUSE Uncharacterized protein (Fragment) OS=Mus musculus OX=10090 GN=Sco1 PE=2 SV=1;sp|Q5SUC9|SCO1_MOUSE Protein SCO1 homolog, mitochondrial OS=Mus musculus OX=10090 GN=Sco1 PE=1 SV=1;tr|Q5SUD5|Q5SUD5_MOUSE Protein SCO1 homolog, mitochondr	Q3TJT6	Sco1	Thioredoxin domain-containing protein (Fragment)	3	3	3	9.7	27.367	36613000	31045000	33624000	30204000	23506000	29567000	0.822229	0.0880898
tr|Q9CQG4|Q9CQG4_MOUSE;tr|Q921E4|Q921E4_MOUSE;tr|Q5QGU0|Q5QGU0_MOUSE;tr|G3X8R0|G3X8R0_MOUSE;sp|Q60870|REEP5_MOUSE	tr|Q9CQG4|Q9CQG4_MOUSE;tr|Q921E4|Q921E4_MOUSE;tr|Q5QGU0|Q5QGU0_MOUSE;tr|G3X8R0|G3X8R0_MOUSE;sp|Q60870|REEP5_MOUSE	tr|Q9CQG4|Q9CQG4_MOUSE Receptor expression-enhancing protein OS=Mus musculus OX=10090 GN=Reep5 PE=2 SV=1;tr|Q921E4|Q921E4_MOUSE Receptor expression-enhancing protein OS=Mus musculus OX=10090 GN=Reep5 PE=2 SV=1;tr|Q5QGU0|Q5QGU0_MOUSE Receptor expression-enh	Q9CQG4	Reep5 Dp1	Receptor expression-enhancing protein	5	6	6	22.2	21.086	662400000	597340000	563980000	541520000	556240000	515020000	0.884335	0.0880903
sp|Q6NXY1|TBC31_MOUSE;tr|Q3UR49|Q3UR49_MOUSE;tr|F6T4B0|F6T4B0_MOUSE	sp|Q6NXY1|TBC31_MOUSE;tr|Q3UR49|Q3UR49_MOUSE	sp|Q6NXY1|TBC31_MOUSE TBC1 domain family member 31 OS=Mus musculus OX=10090 GN=Tbc1d31 PE=1 SV=1;tr|Q3UR49|Q3UR49_MOUSE Uncharacterized protein (Fragment) OS=Mus musculus OX=10090 GN=Tbc1d31 PE=2 SV=1	Q6NXY1	Tbc1d31 Wdr67	TBC1 domain family member 31 (Protein 4-B-3) (WD repeat-containing protein 67)	3	14	14	19.1	115.84	77820000	78204000	86718000	71790000	75606000	62306000	0.863888	0.0881369
tr|E9QPI5|E9QPI5_MOUSE;sp|Q6A026|PDS5A_MOUSE;tr|Q8VDS0|Q8VDS0_MOUSE;tr|A0A0J9YV33|A0A0J9YV33_MOUSE;tr|Q9D337|Q9D337_MOUSE	tr|E9QPI5|E9QPI5_MOUSE;sp|Q6A026|PDS5A_MOUSE	tr|E9QPI5|E9QPI5_MOUSE Sister chromatid cohesion protein PDS5 homolog A OS=Mus musculus OX=10090 GN=Pds5a PE=1 SV=1;sp|Q6A026|PDS5A_MOUSE Sister chromatid cohesion protein PDS5 homolog A OS=Mus musculus OX=10090 GN=Pds5a PE=1 SV=3	E9QPI5	Pds5a	Sister chromatid cohesion protein PDS5 homolog A	5	30	26	30	150.22	164250000	144650000	168170000	171400000	177930000	179510000	1.10852	0.088141
sp|Q5S248|TM11E_MOUSE	sp|Q5S248|TM11E_MOUSE	sp|Q5S248|TM11E_MOUSE Transmembrane protease serine 11E OS=Mus musculus OX=10090 GN=Tmprss11e PE=1 SV=2	Q5S248	Tmprss11e Desc1	Transmembrane protease serine 11E (EC 3.4.21.-) (Serine protease DESC1) [Cleaved into: Transmembrane protease serine 11E non-catalytic chain; Transmembrane protease serine 11E catalytic chain]	1	11	11	35.9	48.064	190430000	161080000	152150000	147430000	138120000	137220000	0.839396	0.0882065
tr|Q80ZP8|Q80ZP8_MOUSE;tr|Q3TMX5|Q3TMX5_MOUSE;tr|A8C1V1|A8C1V1_MOUSE;sp|Q9CXI5|MANF_MOUSE;tr|F6USD5|F6USD5_MOUSE;tr|F6T4L3|F6T4L3_MOUSE;tr|F7C1S6|F7C1S6_MOUSE	tr|Q80ZP8|Q80ZP8_MOUSE;tr|Q3TMX5|Q3TMX5_MOUSE;tr|A8C1V1|A8C1V1_MOUSE;sp|Q9CXI5|MANF_MOUSE;tr|F6USD5|F6USD5_MOUSE;tr|F6T4L3|F6T4L3_MOUSE	tr|Q80ZP8|Q80ZP8_MOUSE Armet protein OS=Mus musculus OX=10090 GN=Manf PE=1 SV=1;tr|Q3TMX5|Q3TMX5_MOUSE Arginine-rich, mutated in early stage tumors, isoform CRA_b OS=Mus musculus OX=10090 GN=Manf PE=1 SV=1;tr|A8C1V1|A8C1V1_MOUSE Uncharacterized protein (Fr	Q80ZP8	Manf Armet	Armet protein (Mesencephalic astrocyte-derived neurotrophic factor)	7	13	13	53.3	19.012	1000900000	1045300000	974410000	983420000	900520000	915770000	0.926869	0.088224
sp|Q9JJ28|FLII_MOUSE;tr|Q3TUY1|Q3TUY1_MOUSE	sp|Q9JJ28|FLII_MOUSE	sp|Q9JJ28|FLII_MOUSE Protein flightless-1 homolog OS=Mus musculus OX=10090 GN=Flii PE=1 SV=1	Q9JJ28	Flii Fli1 Fliih	Protein flightless-1 homolog	2	24	24	23.3	144.8	183000000	178910000	195280000	198040000	200200000	194080000	1.06305	0.0889329
sp|Q8BU33|ILVBL_MOUSE;tr|A0A1W2P8D6|A0A1W2P8D6_MOUSE;tr|A0A1W2P727|A0A1W2P727_MOUSE;tr|A0A1W2P8E1|A0A1W2P8E1_MOUSE	sp|Q8BU33|ILVBL_MOUSE;tr|A0A1W2P8D6|A0A1W2P8D6_MOUSE;tr|A0A1W2P727|A0A1W2P727_MOUSE;tr|A0A1W2P8E1|A0A1W2P8E1_MOUSE	sp|Q8BU33|ILVBL_MOUSE Acetolactate synthase-like protein OS=Mus musculus OX=10090 GN=Ilvbl PE=1 SV=1;tr|A0A1W2P8D6|A0A1W2P8D6_MOUSE Acetolactate synthase-like protein (Fragment) OS=Mus musculus OX=10090 GN=Ilvbl PE=1 SV=1;tr|A0A1W2P727|A0A1W2P727_MOUSE Ace	Q8BU33	Ilvbl	Acetolactate synthase-like protein (EC 2.2.1.-) (IlvB-like protein)	4	5	5	14.4	68.155	24442000	28586000	27333000	20815000	24060000	24312000	0.860952	0.0889648
tr|E9QNG1|E9QNG1_MOUSE;sp|Q9Z0R6|ITSN2_MOUSE;tr|B2RR82|B2RR82_MOUSE;tr|Q80TG5|Q80TG5_MOUSE;tr|A0A1W2P775|A0A1W2P775_MOUSE;tr|Q3TQ85|Q3TQ85_MOUSE;tr|Q3V3Y8|Q3V3Y8_MOUSE;tr|A0A1W2P7G8|A0A1W2P7G8_MOUSE	tr|E9QNG1|E9QNG1_MOUSE;sp|Q9Z0R6|ITSN2_MOUSE;tr|B2RR82|B2RR82_MOUSE;tr|Q80TG5|Q80TG5_MOUSE;tr|A0A1W2P775|A0A1W2P775_MOUSE	tr|E9QNG1|E9QNG1_MOUSE Intersectin-2 OS=Mus musculus OX=10090 GN=Itsn2 PE=1 SV=1;sp|Q9Z0R6|ITSN2_MOUSE Intersectin-2 OS=Mus musculus OX=10090 GN=Itsn2 PE=1 SV=2;tr|B2RR82|B2RR82_MOUSE Intersectin-2 OS=Mus musculus OX=10090 GN=Itsn2 PE=1 SV=1;tr|Q80TG5|Q80T	E9QNG1	Itsn2	Intersectin-2	8	5	5	4.2	188.78	19976000	19791000	20669000	25733000	21964000	21680000	1.14794	0.0890839
tr|Q544Z3|Q544Z3_MOUSE;sp|Q99020|ROAA_MOUSE;tr|Q3TMZ8|Q3TMZ8_MOUSE;tr|Q20BD0|Q20BD0_MOUSE;tr|Q9D6G1|Q9D6G1_MOUSE;tr|Q80XR6|Q80XR6_MOUSE;tr|Q8CIR3|Q8CIR3_MOUSE	tr|Q544Z3|Q544Z3_MOUSE;sp|Q99020|ROAA_MOUSE;tr|Q3TMZ8|Q3TMZ8_MOUSE;tr|Q20BD0|Q20BD0_MOUSE;tr|Q9D6G1|Q9D6G1_MOUSE;tr|Q80XR6|Q80XR6_MOUSE	tr|Q544Z3|Q544Z3_MOUSE Heterogeneous nuclear ribonucleoprotein A/B, isoform CRA_c OS=Mus musculus OX=10090 GN=Hnrnpab PE=1 SV=1;sp|Q99020|ROAA_MOUSE Heterogeneous nuclear ribonucleoprotein A/B OS=Mus musculus OX=10090 GN=Hnrnpab PE=1 SV=1;tr|Q3TMZ8|Q3TMZ8_	Q544Z3	Hnrnpab Hnrpab mCG_6983	Heterogeneous nuclear ribonucleoprotein A/B, isoform CRA_c (S1 protein D2)	7	17	17	45.6	30.831	2945900000	3049300000	3200400000	2664900000	2983000000	2731100000	0.911197	0.0892504
sp|O55201|SPT5H_MOUSE;tr|A0A140LJ34|A0A140LJ34_MOUSE	sp|O55201|SPT5H_MOUSE	sp|O55201|SPT5H_MOUSE Transcription elongation factor SPT5 OS=Mus musculus OX=10090 GN=Supt5h PE=1 SV=1	O55201	Supt5h Supt5	Transcription elongation factor SPT5 (DRB sensitivity-inducing factor large subunit) (DSIF large subunit)	2	23	23	29.9	120.66	168030000	177480000	196500000	204950000	205790000	193340000	1.11452	0.0897994
tr|E9Q6Q4|E9Q6Q4_MOUSE;tr|Q3TU36|Q3TU36_MOUSE;tr|Q3TPS9|Q3TPS9_MOUSE;tr|E9Q912|E9Q912_MOUSE;tr|Q8BKH0|Q8BKH0_MOUSE;tr|A0A0G2JGC8|A0A0G2JGC8_MOUSE;tr|Q3TA69|Q3TA69_MOUSE;tr|I6L967|I6L967_MOUSE;tr|Q3TLU4|Q3TLU4_MOUSE;tr|Q3TYN8|Q3TYN8_MOUSE;tr|A0A0G2JF70|A0A0G2JF70_MOUSE	tr|E9Q6Q4|E9Q6Q4_MOUSE;tr|Q3TU36|Q3TU36_MOUSE;tr|Q3TPS9|Q3TPS9_MOUSE;tr|E9Q912|E9Q912_MOUSE;tr|Q8BKH0|Q8BKH0_MOUSE;tr|A0A0G2JGC8|A0A0G2JGC8_MOUSE;tr|Q3TA69|Q3TA69_MOUSE;tr|I6L967|I6L967_MOUSE;tr|Q3TLU4|Q3TLU4_MOUSE	tr|E9Q6Q4|E9Q6Q4_MOUSE RAP1, GTP-GDP dissociation stimulator 1 OS=Mus musculus OX=10090 GN=Rap1gds1 PE=1 SV=1;tr|Q3TU36|Q3TU36_MOUSE RAP1, GTP-GDP dissociation stimulator 1 OS=Mus musculus OX=10090 GN=Rap1gds1 PE=1 SV=1;tr|Q3TPS9|Q3TPS9_MOUSE Uncharacteriz	E9Q6Q4	Rap1gds1	RAP1, GTP-GDP dissociation stimulator 1	11	6	6	15.1	60.792	27978000	29981000	38761000	14261000	28630000	17014000	0.619365	0.0898674
tr|B2RSV4|B2RSV4_MOUSE;sp|Q921M3|SF3B3_MOUSE	tr|B2RSV4|B2RSV4_MOUSE;sp|Q921M3|SF3B3_MOUSE	tr|B2RSV4|B2RSV4_MOUSE Splicing factor 3b, subunit 3 OS=Mus musculus OX=10090 GN=Sf3b3 PE=2 SV=1;sp|Q921M3|SF3B3_MOUSE Splicing factor 3B subunit 3 OS=Mus musculus OX=10090 GN=Sf3b3 PE=1 SV=1	B2RSV4	Sf3b3 mCG_3763	Splicing factor 3b, subunit 3	2	49	49	55.5	135.55	1916000000	1912700000	1938100000	2044500000	1941800000	1986200000	1.03567	0.0899028
sp|O08547|SC22B_MOUSE;tr|E9Q6R3|E9Q6R3_MOUSE;tr|Q3UZ06|Q3UZ06_MOUSE;tr|A0A0G2JF08|A0A0G2JF08_MOUSE;tr|D6RES2|D6RES2_MOUSE	sp|O08547|SC22B_MOUSE;tr|E9Q6R3|E9Q6R3_MOUSE;tr|Q3UZ06|Q3UZ06_MOUSE	sp|O08547|SC22B_MOUSE Vesicle-trafficking protein SEC22b OS=Mus musculus OX=10090 GN=Sec22b PE=1 SV=3;tr|E9Q6R3|E9Q6R3_MOUSE Vesicle-trafficking protein SEC22b OS=Mus musculus OX=10090 GN=Sec22b PE=1 SV=1;tr|Q3UZ06|Q3UZ06_MOUSE Uncharacterized protein OS=M	O08547	Sec22b Sec22l1	Vesicle-trafficking protein SEC22b (ER-Golgi SNARE of 24 kDa) (ERS-24) (ERS24) (SEC22 vesicle-trafficking protein homolog B) (SEC22 vesicle-trafficking protein-like 1) (mSec22b)	5	12	12	60.5	24.74	564740000	614880000	572790000	547840000	555820000	541190000	0.938622	0.0900746
tr|E9Q186|E9Q186_MOUSE;sp|Q9CTH6|FCF1_MOUSE	tr|E9Q186|E9Q186_MOUSE;sp|Q9CTH6|FCF1_MOUSE	tr|E9Q186|E9Q186_MOUSE rRNA-processing protein FCF1 homolog OS=Mus musculus OX=10090 GN=Fcf1 PE=1 SV=1;sp|Q9CTH6|FCF1_MOUSE rRNA-processing protein FCF1 homolog OS=Mus musculus OX=10090 GN=Fcf1 PE=2 SV=2	E9Q186	Fcf1	rRNA-processing protein FCF1 homolog	2	6	6	38.2	21.919	114890000	90574000	99386000	91945000	79357000	76574000	0.813108	0.0901439
sp|Q00PI9|HNRL2_MOUSE;tr|Q8BIQ7|Q8BIQ7_MOUSE;tr|Q8BIY6|Q8BIY6_MOUSE	sp|Q00PI9|HNRL2_MOUSE	sp|Q00PI9|HNRL2_MOUSE Heterogeneous nuclear ribonucleoprotein U-like protein 2 OS=Mus musculus OX=10090 GN=Hnrnpul2 PE=1 SV=2	Q00PI9	Hnrnpul2 Hnrpul2 Manp	Heterogeneous nuclear ribonucleoprotein U-like protein 2 (MLF1-associated nuclear protein)	3	29	29	40.4	84.939	1055500000	1050400000	1036000000	1038700000	999700000	976570000	0.959601	0.0904692
tr|Q91V55|Q91V55_MOUSE;tr|D3YYM6|D3YYM6_MOUSE;tr|D3Z1S8|D3Z1S8_MOUSE;sp|P97461|RS5_MOUSE	tr|Q91V55|Q91V55_MOUSE;tr|D3YYM6|D3YYM6_MOUSE;tr|D3Z1S8|D3Z1S8_MOUSE;sp|P97461|RS5_MOUSE	tr|Q91V55|Q91V55_MOUSE 40S ribosomal protein S5 OS=Mus musculus OX=10090 GN=Rps5 PE=1 SV=1;tr|D3YYM6|D3YYM6_MOUSE 40S ribosomal protein S5 (Fragment) OS=Mus musculus OX=10090 GN=Rps5 PE=1 SV=1;tr|D3Z1S8|D3Z1S8_MOUSE 40S ribosomal protein S5 (Fragment) OS=M	Q91V55	Rps5 mCG_22552	40S ribosomal protein S5 (Ribosomal protein S5) (Ribosomal protein S5, isoform CRA_a)	4	13	13	55.4	22.876	2653700000	2545400000	2543200000	2436200000	2369600000	2534900000	0.948129	0.0906038
sp|Q9CWK3|CD2B2_MOUSE;tr|Q69ZP6|Q69ZP6_MOUSE;tr|Q3U4A3|Q3U4A3_MOUSE;tr|A0A0U1RP07|A0A0U1RP07_MOUSE;tr|A0A0U1RNG1|A0A0U1RNG1_MOUSE;tr|A0A0U1RPR4|A0A0U1RPR4_MOUSE;tr|A0A0U1RNN2|A0A0U1RNN2_MOUSE	sp|Q9CWK3|CD2B2_MOUSE;tr|Q69ZP6|Q69ZP6_MOUSE;tr|Q3U4A3|Q3U4A3_MOUSE;tr|A0A0U1RP07|A0A0U1RP07_MOUSE;tr|A0A0U1RNG1|A0A0U1RNG1_MOUSE	sp|Q9CWK3|CD2B2_MOUSE CD2 antigen cytoplasmic tail-binding protein 2 OS=Mus musculus OX=10090 GN=Cd2bp2 PE=1 SV=1;tr|Q69ZP6|Q69ZP6_MOUSE MKIAA1178 protein (Fragment) OS=Mus musculus OX=10090 GN=Cd2bp2 PE=2 SV=1;tr|Q3U4A3|Q3U4A3_MOUSE Uncharacterized protei	Q9CWK3	Cd2bp2	CD2 antigen cytoplasmic tail-binding protein 2 (CD2 cytoplasmic domain-binding protein 2) (CD2 tail-binding protein 2)	7	6	6	30.1	37.694	49706000	51844000	55623000	48787000	44998000	48988000	0.908381	0.0906532
sp|Q8K1E0|STX5_MOUSE;tr|I1E4X1|I1E4X1_MOUSE;tr|H3BJ02|H3BJ02_MOUSE;tr|H3BJE3|H3BJE3_MOUSE;tr|H3BKJ7|H3BKJ7_MOUSE;tr|H3BKP0|H3BKP0_MOUSE;tr|H3BKP3|H3BKP3_MOUSE;tr|H3BJ89|H3BJ89_MOUSE;tr|H3BKD6|H3BKD6_MOUSE;tr|H3BL25|H3BL25_MOUSE	sp|Q8K1E0|STX5_MOUSE;tr|I1E4X1|I1E4X1_MOUSE;tr|H3BJ02|H3BJ02_MOUSE;tr|H3BJE3|H3BJE3_MOUSE;tr|H3BKJ7|H3BKJ7_MOUSE	sp|Q8K1E0|STX5_MOUSE Syntaxin-5 OS=Mus musculus OX=10090 GN=Stx5 PE=1 SV=3;tr|I1E4X1|I1E4X1_MOUSE Syntaxin 5A OS=Mus musculus OX=10090 GN=Stx5a PE=1 SV=1;tr|H3BJ02|H3BJ02_MOUSE Syntaxin 5A OS=Mus musculus OX=10090 GN=Stx5a PE=1 SV=1;tr|H3BJE3|H3BJE3_MOUSE	Q8K1E0	Stx5 Stx5a	Syntaxin-5	10	9	9	35.5	39.713	75436000	83642000	88502000	90736000	102730000	90822000	1.14827	0.0907188
sp|Q9Z0W3|NU160_MOUSE	sp|Q9Z0W3|NU160_MOUSE	sp|Q9Z0W3|NU160_MOUSE Nuclear pore complex protein Nup160 OS=Mus musculus OX=10090 GN=Nup160 PE=1 SV=2	Q9Z0W3	Nup160 Gtl1-13 Kiaa0197	Nuclear pore complex protein Nup160 (160 kDa nucleoporin) (Gene trap locus 1-13 protein) (GTL-13) (Nucleoporin Nup160)	1	31	31	31.7	158.23	696960000	687790000	628170000	734980000	745160000	701280000	1.08371	0.0907441
sp|Q8BJW6|EIF2A_MOUSE;tr|D3YZZ6|D3YZZ6_MOUSE;tr|D6RFN2|D6RFN2_MOUSE;tr|D6RGA6|D6RGA6_MOUSE	sp|Q8BJW6|EIF2A_MOUSE	sp|Q8BJW6|EIF2A_MOUSE Eukaryotic translation initiation factor 2A OS=Mus musculus OX=10090 GN=Eif2a PE=1 SV=2	Q8BJW6	Eif2a D3Ertd194e	Eukaryotic translation initiation factor 2A (eIF-2A) [Cleaved into: Eukaryotic translation initiation factor 2A, N-terminally processed]	4	21	21	51.5	64.403	331170000	291780000	313890000	340840000	332750000	341280000	1.08329	0.0909096
sp|Q8K078|SO4A1_MOUSE	sp|Q8K078|SO4A1_MOUSE	sp|Q8K078|SO4A1_MOUSE Solute carrier organic anion transporter family member 4A1 OS=Mus musculus OX=10090 GN=Slco4a1 PE=1 SV=2	Q8K078	Slco4a1 Oatp4a1 Oatpe Slc21a12	Solute carrier organic anion transporter family member 4A1 (Organic anion-transporting polypeptide E) (OATP-E) (Sodium-independent organic anion transporter E) (Solute carrier family 21 member 12)	1	7	7	15.6	77.668	43416000	45088000	43240000	36301000	38303000	43122000	0.893597	0.0909696
tr|Q9JIH4|Q9JIH4_MOUSE;tr|A0A1U6URG8|A0A1U6URG8_MOUSE;sp|Q9WV30|NFAT5_MOUSE;tr|Q9JIH5|Q9JIH5_MOUSE;tr|Q3UZ77|Q3UZ77_MOUSE;tr|Q8VHJ6|Q8VHJ6_MOUSE	tr|Q9JIH4|Q9JIH4_MOUSE;tr|A0A1U6URG8|A0A1U6URG8_MOUSE;sp|Q9WV30|NFAT5_MOUSE;tr|Q9JIH5|Q9JIH5_MOUSE;tr|Q3UZ77|Q3UZ77_MOUSE;tr|Q8VHJ6|Q8VHJ6_MOUSE	tr|Q9JIH4|Q9JIH4_MOUSE NFATz2 OS=Mus musculus OX=10090 GN=Nfat5 PE=2 SV=1;tr|A0A1U6URG8|A0A1U6URG8_MOUSE Nuclear factor of-activated T-cells 5 OS=Mus musculus OX=10090 GN=Nfat5 PE=1 SV=1;sp|Q9WV30|NFAT5_MOUSE Nuclear factor of activated T-cells 5 OS=Mus mu	Q9JIH4	Nfat5 Nfatz2	NFATz2	6	4	3	9.9	72.703	13521000	15117000	NaN	NaN	17749000	16726000	1.20382	0.0912691
tr|Q5SX75|Q5SX75_MOUSE;tr|Q5SX74|Q5SX74_MOUSE;sp|Q60716|P4HA2_MOUSE;tr|B0QZH3|B0QZH3_MOUSE;tr|Q3UQ81|Q3UQ81_MOUSE;tr|B0QZH1|B0QZH1_MOUSE;tr|Q5SX76|Q5SX76_MOUSE;tr|B0QZH2|B0QZH2_MOUSE	tr|Q5SX75|Q5SX75_MOUSE;tr|Q5SX74|Q5SX74_MOUSE;sp|Q60716|P4HA2_MOUSE	tr|Q5SX75|Q5SX75_MOUSE Procollagen-proline, 2-oxoglutarate 4-dioxygenase (Proline 4-hydroxylase), alpha II polypeptide, isoform CRA_f OS=Mus musculus OX=10090 GN=P4ha2 PE=1 SV=1;tr|Q5SX74|Q5SX74_MOUSE Uncharacterized protein OS=Mus musculus OX=10090 GN=P4h	Q5SX75	P4ha2 mCG_13782	Procollagen-proline, 2-oxoglutarate 4-dioxygenase (Proline 4-hydroxylase), alpha II polypeptide, isoform CRA_f (Prolyl 4-hydroxylase subunit alpha-2)	8	15	15	35.4	61.014	152470000	147300000	141060000	138430000	140090000	140100000	0.949618	0.091293
sp|Q9D7J9|ECHD3_MOUSE	sp|Q9D7J9|ECHD3_MOUSE	sp|Q9D7J9|ECHD3_MOUSE Enoyl-CoA hydratase domain-containing protein 3, mitochondrial OS=Mus musculus OX=10090 GN=Echdc3 PE=1 SV=1	Q9D7J9	Echdc3	Enoyl-CoA hydratase domain-containing protein 3, mitochondrial	1	10	10	55.3	32.402	166150000	185230000	172110000	167030000	156870000	151670000	0.908461	0.0913348
tr|Q3UMJ4|Q3UMJ4_MOUSE;sp|Q8R0A0|T2FB_MOUSE;tr|Q9CTB8|Q9CTB8_MOUSE	tr|Q3UMJ4|Q3UMJ4_MOUSE;sp|Q8R0A0|T2FB_MOUSE	tr|Q3UMJ4|Q3UMJ4_MOUSE General transcription factor IIF subunit 2 OS=Mus musculus OX=10090 GN=Gtf2f2 PE=1 SV=1;sp|Q8R0A0|T2FB_MOUSE General transcription factor IIF subunit 2 OS=Mus musculus OX=10090 GN=Gtf2f2 PE=1 SV=1	Q3UMJ4	Gtf2f2 mCG_10600	General transcription factor IIF subunit 2 (EC 3.6.4.12) (Transcription initiation factor IIF subunit beta)	3	5	5	30.5	28.381	24495000	36102000	31580000	45298000	37410000	37648000	1.30571	0.0919756
sp|Q9ER88|RT29_MOUSE;tr|G3X9M0|G3X9M0_MOUSE;tr|A0A0R4J1B9|A0A0R4J1B9_MOUSE;tr|G3UWZ6|G3UWZ6_MOUSE;tr|G3UWM7|G3UWM7_MOUSE;tr|G3UWJ4|G3UWJ4_MOUSE;tr|G3UZC0|G3UZC0_MOUSE;tr|G3UWR5|G3UWR5_MOUSE;tr|G3UYM6|G3UYM6_MOUSE;tr|G3UYP3|G3UYP3_MOUSE	sp|Q9ER88|RT29_MOUSE;tr|G3X9M0|G3X9M0_MOUSE;tr|A0A0R4J1B9|A0A0R4J1B9_MOUSE;tr|G3UWZ6|G3UWZ6_MOUSE;tr|G3UWM7|G3UWM7_MOUSE;tr|G3UWJ4|G3UWJ4_MOUSE;tr|G3UZC0|G3UZC0_MOUSE	sp|Q9ER88|RT29_MOUSE 28S ribosomal protein S29, mitochondrial OS=Mus musculus OX=10090 GN=Dap3 PE=1 SV=1;tr|G3X9M0|G3X9M0_MOUSE 28S ribosomal protein S29, mitochondrial OS=Mus musculus OX=10090 GN=Dap3 PE=1 SV=1;tr|A0A0R4J1B9|A0A0R4J1B9_MOUSE 28S ribosomal	Q9ER88	Dap3 Mrps29	28S ribosomal protein S29, mitochondrial (MRP-S29) (S29mt) (Death-associated protein 3) (DAP-3)	10	14	14	44.2	44.699	482710000	440930000	390190000	402270000	355330000	344280000	0.838678	0.0926847
sp|Q8BI84|TGO1_MOUSE;tr|J3KMG3|J3KMG3_MOUSE;tr|A0A0R4J2D3|A0A0R4J2D3_MOUSE	sp|Q8BI84|TGO1_MOUSE	sp|Q8BI84|TGO1_MOUSE Transport and Golgi organization protein 1 homolog OS=Mus musculus OX=10090 GN=Mia3 PE=1 SV=2	Q8BI84	Mia3 Kiaa0268 Tango	Transport and Golgi organization protein 1 homolog (TANGO1) (Melanoma inhibitory activity protein 3)	3	35	22	26.6	213.67	459590000	469960000	403800000	398830000	397880000	400990000	0.898264	0.0927836
sp|Q9JL35|HMGN5_MOUSE	sp|Q9JL35|HMGN5_MOUSE	sp|Q9JL35|HMGN5_MOUSE High mobility group nucleosome-binding domain-containing protein 5 OS=Mus musculus OX=10090 GN=Hmgn5 PE=1 SV=2	Q9JL35	Hmgn5 Garp45 Nsbp1	High mobility group nucleosome-binding domain-containing protein 5 (Nucleosome-binding protein 1) (Nucleosome-binding protein 45) (NBP-45) (Protein GARP45)	1	2	2	11.3	45.343	17947000	NaN	20496000	27701000	23075000	23048000	1.28023	0.0928143
sp|Q9DBP5|KCY_MOUSE;tr|A0A0R4J093|A0A0R4J093_MOUSE	sp|Q9DBP5|KCY_MOUSE;tr|A0A0R4J093|A0A0R4J093_MOUSE	sp|Q9DBP5|KCY_MOUSE UMP-CMP kinase OS=Mus musculus OX=10090 GN=Cmpk1 PE=1 SV=1;tr|A0A0R4J093|A0A0R4J093_MOUSE UMP-CMP kinase OS=Mus musculus OX=10090 GN=Cmpk1 PE=1 SV=1	Q9DBP5	Cmpk1 Cmk Cmpk Uck Umk Umpk	UMP-CMP kinase (EC 2.7.4.14) (Deoxycytidylate kinase) (CK) (dCMP kinase) (Nucleoside-diphosphate kinase) (EC 2.7.4.6) (Uridine monophosphate/cytidine monophosphate kinase) (UMP/CMP kinase) (UMP/CMPK)	2	5	5	32.1	22.165	49300000	42954000	53140000	41589000	40277000	43195000	0.860152	0.09315
sp|Q9CSH3|RRP44_MOUSE;tr|A0A2I3BR78|A0A2I3BR78_MOUSE;tr|Q8R2P7|Q8R2P7_MOUSE;tr|A0A2I3BR88|A0A2I3BR88_MOUSE	sp|Q9CSH3|RRP44_MOUSE;tr|A0A2I3BR78|A0A2I3BR78_MOUSE;tr|Q8R2P7|Q8R2P7_MOUSE	sp|Q9CSH3|RRP44_MOUSE Exosome complex exonuclease RRP44 OS=Mus musculus OX=10090 GN=Dis3 PE=1 SV=4;tr|A0A2I3BR78|A0A2I3BR78_MOUSE Exosome complex exonuclease RRP44 OS=Mus musculus OX=10090 GN=Dis3 PE=1 SV=1;tr|Q8R2P7|Q8R2P7_MOUSE DIS3 mitotic control homol	Q9CSH3	Dis3 Kiaa1008 Rrp44	Exosome complex exonuclease RRP44 (EC 3.1.13.-) (EC 3.1.26.-) (Protein DIS3 homolog) (Ribosomal RNA-processing protein 44)	4	24	24	36.1	108.84	170000000	188070000	202670000	213740000	204900000	206740000	1.11528	0.0933738
sp|P50428|ARSA_MOUSE	sp|P50428|ARSA_MOUSE	sp|P50428|ARSA_MOUSE Arylsulfatase A OS=Mus musculus OX=10090 GN=Arsa PE=1 SV=2	P50428	Arsa As2	Arylsulfatase A (ASA) (EC 3.1.6.8) (Cerebroside-sulfatase)	1	3	3	18.2	53.748	42386000	41153000	52196000	50186000	57889000	66986000	1.28973	0.0935362
tr|Q5FWJ3|Q5FWJ3_MOUSE;sp|P20152|VIME_MOUSE;tr|Q3V2S4|Q3V2S4_MOUSE;tr|Q3U6S1|Q3U6S1_MOUSE;tr|A0A0A6YWC8|A0A0A6YWC8_MOUSE;tr|Q3TWV0|Q3TWV0_MOUSE;tr|Q3UAX1|Q3UAX1_MOUSE;tr|Q3UD36|Q3UD36_MOUSE;tr|A4IF59|A4IF59_MOUSE;tr|A2AKJ2|A2AKJ2_MOUSE;tr|Q3V2C6|Q3V2C6_MOUSE;tr|Q3V1K9|Q3V1K9_MOUSE;sp|P31001|DESM_MOUSE;sp|P03995|GFAP_MOUSE;tr|Q9JJY2|Q9JJY2_MOUSE;tr|A0MTM0|A0MTM0_MOUSE;tr|Q3UMG4|Q3UMG4_MOUSE;tr|Q4L…	tr|Q5FWJ3|Q5FWJ3_MOUSE;sp|P20152|VIME_MOUSE;tr|Q3V2S4|Q3V2S4_MOUSE;tr|Q3U6S1|Q3U6S1_MOUSE;tr|A0A0A6YWC8|A0A0A6YWC8_MOUSE;tr|Q3TWV0|Q3TWV0_MOUSE;tr|Q3UAX1|Q3UAX1_MOUSE;tr|Q3UD36|Q3UD36_MOUSE	tr|Q5FWJ3|Q5FWJ3_MOUSE Vimentin OS=Mus musculus OX=10090 GN=Vim PE=1 SV=1;sp|P20152|VIME_MOUSE Vimentin OS=Mus musculus OX=10090 GN=Vim PE=1 SV=3;tr|Q3V2S4|Q3V2S4_MOUSE Uncharacterized protein OS=Mus musculus OX=10090 GN=Vim PE=2 SV=1;tr|Q3U6S1|Q3U6S1_MOUS	Q5FWJ3	Vim mCG_15706	Vimentin (Vimentin, isoform CRA_b)	28	61	1	90.8	53.687	88317000000	87382000000	83297000000	77716000000	80121000000	84570000000	0.935949	0.0942498
tr|Q3U2J2|Q3U2J2_MOUSE;tr|Q3TD17|Q3TD17_MOUSE;sp|P17809|GTR1_MOUSE;tr|Q8BTM5|Q8BTM5_MOUSE	tr|Q3U2J2|Q3U2J2_MOUSE;tr|Q3TD17|Q3TD17_MOUSE;sp|P17809|GTR1_MOUSE;tr|Q8BTM5|Q8BTM5_MOUSE	tr|Q3U2J2|Q3U2J2_MOUSE Uncharacterized protein OS=Mus musculus OX=10090 GN=Slc2a1 PE=2 SV=1;tr|Q3TD17|Q3TD17_MOUSE Uncharacterized protein OS=Mus musculus OX=10090 GN=Slc2a1 PE=2 SV=1;sp|P17809|GTR1_MOUSE Solute carrier family 2, facilitated glucose transp	Q3U2J2	Slc2a1	MFS domain-containing protein	4	6	6	10.8	54.07	457310000	478030000	459240000	478660000	491720000	525620000	1.07272	0.0942739
tr|Q0VEE0|Q0VEE0_MOUSE;sp|Q61503|5NTD_MOUSE;tr|Q8C8G9|Q8C8G9_MOUSE	tr|Q0VEE0|Q0VEE0_MOUSE;sp|Q61503|5NTD_MOUSE;tr|Q8C8G9|Q8C8G9_MOUSE	tr|Q0VEE0|Q0VEE0_MOUSE 5 nucleotidase, ecto OS=Mus musculus OX=10090 GN=Nt5e PE=1 SV=1;sp|Q61503|5NTD_MOUSE 5-nucleotidase OS=Mus musculus OX=10090 GN=Nt5e PE=1 SV=2;tr|Q8C8G9|Q8C8G9_MOUSE Uncharacterized protein OS=Mus musculus OX=10090 PE=2 SV=1	Q0VEE0	Nt5e mCG_16768	5' nucleotidase, ecto (5' nucleotidase, ecto, isoform CRA_a)	3	15	15	37.8	63.864	207070000	208390000	227220000	207060000	187830000	179790000	0.894193	0.0944156
tr|J3QMN4|J3QMN4_MOUSE;tr|A0A0U1RPV8|A0A0U1RPV8_MOUSE;tr|A0A0U1RQA4|A0A0U1RQA4_MOUSE;tr|J3QMQ8|J3QMQ8_MOUSE;sp|Q9JLT4|TRXR2_MOUSE;tr|A0A0M3HEQ0|A0A0M3HEQ0_MOUSE;tr|D3Z0K8|D3Z0K8_MOUSE;tr|A0A0M3HEP9|A0A0M3HEP9_MOUSE;tr|A0A0U1RPC6|A0A0U1RPC6_MOUSE;tr|A0A0U1RPY5|A0A0U1RPY5_MOUSE;tr|Q9D8I4|Q9D8I4_MOUSE;tr|A0A0U1RPS1|A0A0U1RPS1_MOUSE	tr|J3QMN4|J3QMN4_MOUSE;tr|A0A0U1RPV8|A0A0U1RPV8_MOUSE;tr|A0A0U1RQA4|A0A0U1RQA4_MOUSE;tr|J3QMQ8|J3QMQ8_MOUSE;sp|Q9JLT4|TRXR2_MOUSE;tr|A0A0M3HEQ0|A0A0M3HEQ0_MOUSE;tr|D3Z0K8|D3Z0K8_MOUSE;tr|A0A0M3HEP9|A0A0M3HEP9_MOUSE;tr|A0A0U1RPC6|A0A0U1RPC6_MOUSE	tr|J3QMN4|J3QMN4_MOUSE Thioredoxin reductase 2, mitochondrial OS=Mus musculus OX=10090 GN=Txnrd2 PE=1 SV=1;tr|A0A0U1RPV8|A0A0U1RPV8_MOUSE Thioredoxin reductase 2, mitochondrial OS=Mus musculus OX=10090 GN=Txnrd2 PE=1 SV=1;tr|A0A0U1RQA4|A0A0U1RQA4_MOUSE Thi	J3QMN4	Txnrd2	Thioredoxin reductase 2, mitochondrial	12	9	9	33	53.051	183570000	189720000	174350000	175870000	162000000	145800000	0.88319	0.0944726
[truncated: 2,790 more rows]

## Sheet: different protein expression
Protein IDs	Majority protein IDs	Fasta headers	Protein ID	GN	Protein names	Number of proteins	Peptides	Unique peptides	Sequence coverage [%]	Mol. weight [kDa]	LFQ intensity_A1	LFQ intensity_A2	LFQ intensity_A3	LFQ intensity_B1	LFQ intensity_B2	LFQ intensity_B3	ratio_B/A	p value
[truncated: 206 more rows]

## Sheet: non or yes expression protein
Supplementary Table 1. The expression of protein.
[truncated: 132 more rows]
