# Supplementary material for: Sublethal heat treatment promotes breast cancer metastasis and its molecular mechanism revealed by quantitative proteomic analysis
Source: Aging (Albany NY). 2022 Feb 12;14(3):1389–406. doi: 10.18632/aging.203884 (PMC8876919; doi:10.18632/aging.203884)
Supplement: Supplementary Table 4 [file aging-14-203884-s004.xls]

Supplementary Table 4. All_vs_DEG.GO.level2.stat
#GO_classify1	GO_classify2	Unigene	diff-Total	Protein_Gene(Unigene)	Gene(diff-Total)
#Total_gene		1733	158
biological process	biological adhesion	4.61627236	1.265822785	A2A863:Itgb4; B2RXS4:Plxnb2; E9Q557:Dsp; O08599:Stxbp1; O35598:Adam10; O35691:Pnn; O54825:Bysl; O54890:Itgb3; O54946:Dnajb6; O55222:Ilk; O88271:Cfdp1; O88327:Ctnnal1; O88792:F11r; P09055:Itgb1; P16045:Lgals1; P19157:Gstp1; P21981:Tgm2; P26039:Tln1; P26041:Msn; P26043:Rdx; P32507:Nectin2; P34152:Ptk2; P35235:Ptpn11; P40240:Cd9; P50543:S100a11; P54731:Faf1; P56480:Atp5f1b; P60766:Cdc42; P63024:Vamp…	P60766:Cdc42; Q61699:Hsph1
biological process	biological regulation	53.54875938	59.49367089	A2A6Q5:Cdc27; A2A863:Itgb4; A2ABV5:Med14; A2ALU4:Shroom2; A2BH40:Arid1a; A6PWY4:Wdr76; B1AQJ2:Usp36; B1AZI6:Thoc2; B2RQC6:Cad; B2RXS4:Plxnb2; B2RY56:Rbm25; B9EKI3:Tmf1; D3YXK2:Safb; D3Z2R5:Selenon; D3Z7P3:Gls; E9PVA8:Gcn1; E9PVX6:Mki67; E9PZJ8:Ascc3; E9PZM4:Chd2; E9Q1P8:Irf2bp2; E9Q4P1:Wdfy1; E9Q557:Dsp; E9Q5F9:Setd2; E9Q5G3:Kif23; E9Q5K9:Ythdc1; F7BJB9:Morc3; F8VPU2:Farp1; G3X9J0:Sipa1l3; G5E829…	A2A6Q5:Cdc27; E9PZJ8:Ascc3; E9Q5F9:Setd2; O08582:Gtpbp1; O08997:Atox1; O35114:Scarb2; O70591:Pfdn2; O88574:Sap30; P11352:Gpx1; P15920:Atp6v0a2; P22892:Ap1g1; P23798:Pcgf2; P27612:Plaa; P27661:H2afx; P28862:Mmp3; P49443:Ppm1a; P51863:Atp6v0d1; P51943:Ccna2; P52432:Polr1c; P60766:Cdc42; P61025:Cks1b; P63213:Gng2; P68181:Prkacb; P70351:Ezh1; P84084:Arf5; P84244:H3f3a; P84244:H3f3b; Q3UMR5:Mcu; Q3USH…
biological process	cell killing	0.230813618	0.632911392	P22892:Ap1g1; P32507:Nectin2; P35700:Prdx1; P70280:Vamp7	P22892:Ap1g1
biological process	cellular component organization or biogenesis	40.33467975	40.50632911	A2A6Q5:Cdc27; A2A863:Itgb4; A2AIL4:Ndufaf6; A2ALU4:Shroom2; A2APY7:Ndufaf5; A2BE28:Las1l; A2BH40:Arid1a; A6H611:Mipep; B1AQJ2:Usp36; B1AXP6:Tomm5; B1AZI6:Thoc2; B2RXS4:Plxnb2; B9EKI3:Tmf1; D3Z2R5:Selenon; D3Z7P3:Gls; E9PVX6:Mki67; E9PZJ8:Ascc3; E9PZM4:Chd2; E9Q557:Dsp; E9Q5F9:Setd2; E9Q5G3:Kif23; E9Q5K9:Ythdc1; F8VPU2:Farp1; G3X9J0:Sipa1l3; G5E870:Trip12; O08528:Hk2; O08529:Capn2; O08547:Sec22b; …	A2A6Q5:Cdc27; E9PZJ8:Ascc3; E9Q5F9:Setd2; O35114:Scarb2; O70591:Pfdn2; O88574:Sap30; P11352:Gpx1; P15920:Atp6v0a2; P23798:Pcgf2; P27661:H2afx; P28862:Mmp3; P49443:Ppm1a; P49452:Cenpc; P51863:Atp6v0d1; P52432:Polr1c; P60766:Cdc42; P62309:Snrpg; P62315:Snrpd1; P70351:Ezh1; P84244:H3f3a; P84244:H3f3b; Q3UA06:Trip13; Q3UFM5:Nom1; Q3USH5:Sfswap; Q61301:Ctnna2; Q61699:Hsph1; Q62371:Ddr2; Q63844:Mapk3; …
biological process	cellular process	83.49682631	83.5443038	A2A6Q5:Cdc27; A2A863:Itgb4; A2ABV5:Med14; A2AIL4:Ndufaf6; A2AIV2:Virma; A2ALU4:Shroom2; A2APY7:Ndufaf5; A2BDX3:Mocs3; A2BE28:Las1l; A2BH40:Arid1a; A6H611:Mipep; A6H619:Phrf1; A6PWY4:Wdr76; A6X919:Dpy19l1; B1AQJ2:Usp36; B1AXP6:Tomm5; B1AZI6:Thoc2; B2RQC6:Cad; B2RXS4:Plxnb2; B2RY56:Rbm25; B9EKI3:Tmf1; D3YXK2:Safb; D3Z2R5:Selenon; D3Z7P3:Gls; E9PVA8:Gcn1; E9PVX6:Mki67; E9PZJ8:Ascc3; E9PZM4:Chd2; E9Q…	A2A6Q5:Cdc27; E9PZJ8:Ascc3; E9Q5F9:Setd2; E9Q6J5:Bod1l; O08582:Gtpbp1; O08997:Atox1; O35114:Scarb2; O35368:Ifi203; O35972:Mrpl23; O70152:Dpm1; O70591:Pfdn2; O88574:Sap30; P11352:Gpx1; P15920:Atp6v0a2; P21550:Eno3; P22892:Ap1g1; P23798:Pcgf2; P27612:Plaa; P27661:H2afx; P28862:Mmp3; P45377:Akr1b8; P49443:Ppm1a; P49452:Cenpc; P51863:Atp6v0d1; P51943:Ccna2; P52432:Polr1c; P55264:Adk; P60766:Cdc42; P6…
biological process	developmental process	28.56318523	28.48101266	A2A863:Itgb4; A2ABV5:Med14; A2ALU4:Shroom2; A2BH40:Arid1a; B1AZI6:Thoc2; B2RQC6:Cad; B2RXS4:Plxnb2; B9EKI3:Tmf1; D3Z2R5:Selenon; E9PVX6:Mki67; E9PZM4:Chd2; E9Q557:Dsp; E9Q5F9:Setd2; F7BJB9:Morc3; F8VPU2:Farp1; G3X9J0:Sipa1l3; G5E829:Atp2b1; G5E870:Trip12; O08528:Hk2; O08529:Capn2; O08553:Dpysl2; O08599:Stxbp1; O08749:Dld; O08807:Prdx4; O08856:Ell; O35114:Scarb2; O35245:Pkd2; O35295:Purb; O35326:S…	E9Q5F9:Setd2; O35114:Scarb2; O88574:Sap30; P11352:Gpx1; P21550:Eno3; P22892:Ap1g1; P23798:Pcgf2; P27661:H2afx; P51863:Atp6v0d1; P51943:Ccna2; P60766:Cdc42; P68181:Prkacb; P70193:Lrig1; P70351:Ezh1; P84244:H3f3a; P84244:H3f3b; Q3UA06:Trip13; Q3UFM5:Nom1; Q61301:Ctnna2; Q62371:Ddr2; Q63844:Mapk3; Q6P069:Sri; Q6P9J9:Ano6; Q6PHZ2:Camk2d; Q7TMY8:Huwe1; Q80V26:Impad1; Q80Y84:Kdm5b; Q80ZJ1:Rap2a; Q8BH57…
biological process	establishment of localization	26.02423543	29.74683544	A2ALU4:Shroom2; A2BH40:Arid1a; A6H611:Mipep; B1AQJ2:Usp36; B1AXP6:Tomm5; B1AZI6:Thoc2; B2RQC6:Cad; B2RX12:Abcc3; B9EKI3:Tmf1; D3Z2R5:Selenon; E9Q5F9:Setd2; E9Q5G3:Kif23; G5E829:Atp2b1; O08528:Hk2; O08547:Sec22b; O08553:Dpysl2; O08583:Alyref; O08599:Stxbp1; O08784:Tcof1; O08915:Aip; O08997:Atox1; O09131:Gsto1; O35114:Scarb2; O35245:Pkd2; O35435:Dhodh; O35598:Adam10; O35864:Cops5; O54692:Zw10; O548…	E9Q5F9:Setd2; O08997:Atox1; O35114:Scarb2; P15920:Atp6v0a2; P22892:Ap1g1; P40336:Vps26a; P49443:Ppm1a; P49452:Cenpc; P51863:Atp6v0d1; P60766:Cdc42; P62627:Dynlrb1; P84084:Arf5; Q3UMR5:Mcu; Q3UYH7:Adrbk2; Q61699:Hsph1; Q63844:Mapk3; Q6P069:Sri; Q6P9J9:Ano6; Q6PHZ2:Camk2d; Q7TMY8:Huwe1; Q80SW1:Ahcyl1; Q80WQ6:Rhbdf2; Q80Y84:Kdm5b; Q80ZJ1:Rap2a; Q8BHE8:Maip1; Q8BNY6:Ncs1; Q8BS95:Gpr89a; Q8BVP5:Csnk1g…
biological process	growth	4.962492787	8.227848101	D3YXK2:Safb; D3Z2R5:Selenon; O08553:Dpysl2; O35465:Fkbp8; O35598:Adam10; O54890:Itgb3; O55222:Ilk; P08228:Sod1; P09055:Itgb1; P11352:Gpx1; P15208:Insr; P21550:Eno3; P23242:Gja1; P28659:Celf1; P34152:Ptk2; P35235:Ptpn11; P37040:Por; P40142:Tkt; P46938:Yap1; P52503:Ndufs6; P52927:Hmga2; P60766:Cdc42; P60824:Cirbp; P62774:Mtpn; P63094:Gnas; P67778:Phb; P68040:Rack1; P70206:Plxna1; P84244:H3f3a; P842…	P11352:Gpx1; P21550:Eno3; P60766:Cdc42; P84244:H3f3a; P84244:H3f3b; Q62371:Ddr2; Q6PHZ2:Camk2d; Q80Y84:Kdm5b; Q8BH57:Wdr48; Q8BHJ5:Tbl1xr1; Q91YU8:Ppan; Q9ERS2:Ndufa13; Q9JHS3:Lamtor2
biological process	immune system process	7.732256203	5.063291139	E9PZM4:Chd2; E9Q4P1:Wdfy1; G3X9J0:Sipa1l3; O35566:Cd151; O35598:Adam10; O54890:Itgb3; O55234:Psmb5; P01027:C3; P06745:Gpi; P08228:Sod1; P09055:Itgb1; P09528:Fth1; P11352:Gpx1; P16045:Lgals1; P20108:Prdx3; P22892:Ap1g1; P25799:Nfkb1; P26041:Msn; P26883:Fkbp1a; P27641:Xrcc5; P27773:Pdia3; P30681:Hmgb2; P32507:Nectin2; P34152:Ptk2; P35235:Ptpn11; P35700:Prdx1; P38647:Hspa9; P49282:Slc11a2; P49722:Ps…	P11352:Gpx1; P22892:Ap1g1; P60766:Cdc42; Q61699:Hsph1; Q63844:Mapk3; Q6P9J9:Ano6; Q9CYH2:Prxl2a; Q9QUM9:Psma6
biological process	localization	31.90998269	35.44303797	A2A863:Itgb4; A2ALU4:Shroom2; A2BH40:Arid1a; A6H611:Mipep; B1AQJ2:Usp36; B1AXP6:Tomm5; B1AZI6:Thoc2; B2RQC6:Cad; B2RX12:Abcc3; B2RXS4:Plxnb2; B9EKI3:Tmf1; D3Z2R5:Selenon; E9Q557:Dsp; E9Q5F9:Setd2; E9Q5G3:Kif23; F7BJB9:Morc3; G5E829:Atp2b1; O08528:Hk2; O08547:Sec22b; O08553:Dpysl2; O08583:Alyref; O08599:Stxbp1; O08784:Tcof1; O08915:Aip; O08997:Atox1; O09131:Gsto1; O35114:Scarb2; O35245:Pkd2; O3543…	E9Q5F9:Setd2; O08997:Atox1; O35114:Scarb2; P11352:Gpx1; P15920:Atp6v0a2; P22892:Ap1g1; P28862:Mmp3; P40336:Vps26a; P49443:Ppm1a; P49452:Cenpc; P51863:Atp6v0d1; P60766:Cdc42; P62627:Dynlrb1; P84084:Arf5; Q3UMR5:Mcu; Q3UYH7:Adrbk2; Q61301:Ctnna2; Q61699:Hsph1; Q62371:Ddr2; Q63844:Mapk3; Q6P069:Sri; Q6P9J9:Ano6; Q6PHZ2:Camk2d; Q7TMY8:Huwe1; Q80SW1:Ahcyl1; Q80WQ6:Rhbdf2; Q80Y84:Kdm5b; Q80ZJ1:Rap2a; Q…
biological process	locomotion	6.982111945	8.227848101	A2A863:Itgb4; A2ALU4:Shroom2; B2RXS4:Plxnb2; B9EKI3:Tmf1; E9Q5F9:Setd2; O08553:Dpysl2; O35566:Cd151; O35598:Adam10; O54890:Itgb3; O55222:Ilk; P09055:Itgb1; P11352:Gpx1; P12815:Pdcd6; P15208:Insr; P23242:Gja1; P26041:Msn; P26043:Rdx; P28660:Nckap1; P28862:Mmp3; P30681:Hmgb2; P34152:Ptk2; P35235:Ptpn11; P48678:Lmna; P54071:Idh2; P54763:Ephb2; P56480:Atp5f1b; P60766:Cdc42; P62071:Rras2; P63085:Mapk1…	E9Q5F9:Setd2; P11352:Gpx1; P28862:Mmp3; P60766:Cdc42; Q61301:Ctnna2; Q62371:Ddr2; Q6P9J9:Ano6; Q6PHZ2:Camk2d; Q80ZJ1:Rap2a; Q91VR8:Brk1; Q9D6K5:Synj2bp; Q9D898:Arpc5l; Q9Z0G0:Gipc1
biological process	metabolic process	66.01269475	67.08860759	A2A6Q5:Cdc27; A2A863:Itgb4; A2ABV5:Med14; A2AIL4:Ndufaf6; A2AIV2:Virma; A2APY7:Ndufaf5; A2BDX3:Mocs3; A2BE28:Las1l; A2BH40:Arid1a; A6H611:Mipep; A6H619:Phrf1; A6X919:Dpy19l1; B1AQJ2:Usp36; B1AZI6:Thoc2; B2RQC6:Cad; B2RXS4:Plxnb2; B2RY56:Rbm25; B7ZMP1:Xpnpep3; B9EKI3:Tmf1; D3YXK2:Safb; D3Z7P3:Gls; E9PVA8:Gcn1; E9PVX6:Mki67; E9PZJ8:Ascc3; E9PZM4:Chd2; E9Q1P8:Irf2bp2; E9Q557:Dsp; E9Q5F9:Setd2; E9Q5K…	A2A6Q5:Cdc27; B7ZMP1:Xpnpep3; E9PZJ8:Ascc3; E9Q5F9:Setd2; E9Q6J5:Bod1l; O08582:Gtpbp1; O08997:Atox1; O35972:Mrpl23; O70152:Dpm1; O88574:Sap30; P11352:Gpx1; P15920:Atp6v0a2; P21550:Eno3; P23798:Pcgf2; P27612:Plaa; P27661:H2afx; P28862:Mmp3; P45377:Akr1b8; P49443:Ppm1a; P51943:Ccna2; P52432:Polr1c; P55264:Adk; P60766:Cdc42; P60898:Polr2i; P61025:Cks1b; P62309:Snrpg; P62315:Snrpd1; P68181:Prkacb; P7…
biological process	multi-organism process	8.886324293	6.962025316	A2A863:Itgb4; A2BH40:Arid1a; B1AZI6:Thoc2; B2RQC6:Cad; B9EKI3:Tmf1; D3Z7P3:Gls; O08749:Dld; O08807:Prdx4; O35435:Dhodh; O54890:Itgb3; O54962:Banf1; O70194:Eif3d; O88508:Dnmt3a; O88587:Comt; O88856:Tpst2; P08228:Sod1; P09055:Itgb1; P11352:Gpx1; P11679:Krt8; P11983:Tcp1; P15066:Jund; P15208:Insr; P16045:Lgals1; P19157:Gstp1; P20108:Prdx3; P23116:Eif3a; P25799:Nfkb1; P27661:H2afx; P28659:Celf1; P304…	P11352:Gpx1; P27661:H2afx; P60766:Cdc42; P84244:H3f3a; P84244:H3f3b; Q3UA06:Trip13; Q63844:Mapk3; Q80Y84:Kdm5b; Q8BH57:Wdr48; Q9CR26:Vta1; Q9QYS9:Qki
biological process	multicellular organismal process	28.1592614	27.21518987	A2A863:Itgb4; A2ABV5:Med14; A2ALU4:Shroom2; A2BH40:Arid1a; B1AZI6:Thoc2; B2RQC6:Cad; B2RXS4:Plxnb2; B7ZMP1:Xpnpep3; B9EKI3:Tmf1; D3Z2R5:Selenon; D3Z7P3:Gls; E9PVX6:Mki67; E9PZM4:Chd2; E9Q557:Dsp; E9Q5F9:Setd2; F7BJB9:Morc3; F8VPU2:Farp1; G3X9J0:Sipa1l3; G5E829:Atp2b1; G5E870:Trip12; O08528:Hk2; O08529:Capn2; O08553:Dpysl2; O08599:Stxbp1; O08749:Dld; O08807:Prdx4; O08856:Ell; O35114:Scarb2; O35245…	B7ZMP1:Xpnpep3; E9Q5F9:Setd2; O35114:Scarb2; O88574:Sap30; P11352:Gpx1; P23798:Pcgf2; P27661:H2afx; P51863:Atp6v0d1; P51943:Ccna2; P60766:Cdc42; P62627:Dynlrb1; P68181:Prkacb; P70193:Lrig1; P70351:Ezh1; P84244:H3f3a; P84244:H3f3b; Q3UA06:Trip13; Q3UFM5:Nom1; Q61301:Ctnna2; Q62371:Ddr2; Q63844:Mapk3; Q6P069:Sri; Q6P9J9:Ano6; Q6PHZ2:Camk2d; Q80V26:Impad1; Q80Y84:Kdm5b; Q80ZJ1:Rap2a; Q8BH57:Wdr48; Q…
biological process	negative regulation of biological process	24.4085401	25.94936709	A2ALU4:Shroom2; A2BH40:Arid1a; A6PWY4:Wdr76; B1AZI6:Thoc2; B2RXS4:Plxnb2; B9EKI3:Tmf1; D3Z2R5:Selenon; E9Q1P8:Irf2bp2; F7BJB9:Morc3; F8VPU2:Farp1; G5E870:Trip12; O08528:Hk2; O08582:Gtpbp1; O08599:Stxbp1; O08807:Prdx4; O08856:Ell; O09131:Gsto1; O35245:Pkd2; O35295:Purb; O35465:Fkbp8; O35598:Adam10; O35638:Stag2; O35841:Api5; O54692:Zw10; O54890:Itgb3; O54941:Smarce1; O54946:Dnajb6; O55106:Strn; O5…	O08582:Gtpbp1; O88574:Sap30; P11352:Gpx1; P23798:Pcgf2; P27661:H2afx; P28862:Mmp3; P49443:Ppm1a; P52432:Polr1c; P60766:Cdc42; P68181:Prkacb; P70351:Ezh1; P84244:H3f3a; P84244:H3f3b; Q3USH5:Sfswap; Q61301:Ctnna2; Q61699:Hsph1; Q64127:Trim24; Q6P069:Sri; Q6PHZ2:Camk2d; Q6ZWY3:Rps27l; Q7TSZ8:Nacc1; Q80WQ6:Rhbdf2; Q80Y84:Kdm5b; Q80ZJ1:Rap2a; Q8BHG9:Cggbp1; Q8BHJ5:Tbl1xr1; Q8K1L5:Ppp1r11; Q8K3A9:Mepce…
biological process	positive regulation of biological process	27.35141373	30.37974684	A2ABV5:Med14; A2BH40:Arid1a; B1AQJ2:Usp36; B2RXS4:Plxnb2; B9EKI3:Tmf1; D3YXK2:Safb; D3Z2R5:Selenon; E9PVA8:Gcn1; E9Q4P1:Wdfy1; E9Q5G3:Kif23; O08528:Hk2; O08547:Sec22b; O08553:Dpysl2; O08582:Gtpbp1; O08599:Stxbp1; O08856:Ell; O09005:Degs1; O09131:Gsto1; O35114:Scarb2; O35245:Pkd2; O35326:Srsf5; O35435:Dhodh; O35465:Fkbp8; O35598:Adam10; O35864:Cops5; O54790:Mafg; O54890:Itgb3; O55201:Supt5h; O5522…	O08582:Gtpbp1; O35114:Scarb2; O70591:Pfdn2; P11352:Gpx1; P22892:Ap1g1; P28862:Mmp3; P49443:Ppm1a; P51943:Ccna2; P60766:Cdc42; P61025:Cks1b; P84244:H3f3a; P84244:H3f3b; Q3UMR5:Mcu; Q61699:Hsph1; Q62371:Ddr2; Q63844:Mapk3; Q64127:Trim24; Q6P069:Sri; Q6P9J9:Ano6; Q6PHZ2:Camk2d; Q7TMY8:Huwe1; Q7TSZ8:Nacc1; Q80SW1:Ahcyl1; Q80Y84:Kdm5b; Q80ZJ1:Rap2a; Q8BH57:Wdr48; Q8BHJ5:Tbl1xr1; Q8BNY6:Ncs1; Q8K3A9:Me…
biological process	regulation of biological process	50.08655511	52.53164557	A2A6Q5:Cdc27; A2A863:Itgb4; A2ABV5:Med14; A2ALU4:Shroom2; A2BH40:Arid1a; A6PWY4:Wdr76; B1AQJ2:Usp36; B1AZI6:Thoc2; B2RXS4:Plxnb2; B2RY56:Rbm25; B9EKI3:Tmf1; D3YXK2:Safb; D3Z2R5:Selenon; D3Z7P3:Gls; E9PVA8:Gcn1; E9PVX6:Mki67; E9PZJ8:Ascc3; E9PZM4:Chd2; E9Q1P8:Irf2bp2; E9Q4P1:Wdfy1; E9Q557:Dsp; E9Q5F9:Setd2; E9Q5G3:Kif23; E9Q5K9:Ythdc1; F7BJB9:Morc3; F8VPU2:Farp1; G3X9J0:Sipa1l3; G5E870:Trip12; O08…	A2A6Q5:Cdc27; E9PZJ8:Ascc3; E9Q5F9:Setd2; O08582:Gtpbp1; O35114:Scarb2; O70591:Pfdn2; O88574:Sap30; P11352:Gpx1; P22892:Ap1g1; P23798:Pcgf2; P27661:H2afx; P28862:Mmp3; P49443:Ppm1a; P51943:Ccna2; P52432:Polr1c; P60766:Cdc42; P61025:Cks1b; P63213:Gng2; P68181:Prkacb; P70351:Ezh1; P84084:Arf5; P84244:H3f3a; P84244:H3f3b; Q3UMR5:Mcu; Q3USH5:Sfswap; Q3UYH7:Adrbk2; Q61301:Ctnna2; Q61699:Hsph1; Q62371:…
biological process	reproduction	5.25100981	6.329113924	A2A863:Itgb4; A2BH40:Arid1a; B2RQC6:Cad; B9EKI3:Tmf1; E9Q5F9:Setd2; O08749:Dld; O08807:Prdx4; O35245:Pkd2; O35435:Dhodh; O35638:Stag2; O54946:Dnajb6; O88508:Dnmt3a; O88587:Comt; O88856:Tpst2; P07742:Rrm1; P08228:Sod1; P09055:Itgb1; P11679:Krt8; P11983:Tcp1; P15208:Insr; P20108:Prdx3; P27661:H2afx; P28659:Celf1; P30416:Fkbp4; P30681:Hmgb2; P32507:Nectin2; P35235:Ptpn11; P40240:Cd9; P49452:Cenpc; P…	E9Q5F9:Setd2; P27661:H2afx; P49452:Cenpc; P68181:Prkacb; P84244:H3f3a; P84244:H3f3b; Q3UA06:Trip13; Q80Y84:Kdm5b; Q8BH57:Wdr48; Q9QYS9:Qki
biological process	reproductive process	5.193306405	6.329113924	A2A863:Itgb4; A2BH40:Arid1a; B2RQC6:Cad; B9EKI3:Tmf1; E9Q5F9:Setd2; O08749:Dld; O08807:Prdx4; O35245:Pkd2; O35435:Dhodh; O35638:Stag2; O54946:Dnajb6; O88508:Dnmt3a; O88587:Comt; O88856:Tpst2; P07742:Rrm1; P08228:Sod1; P09055:Itgb1; P11679:Krt8; P11983:Tcp1; P15208:Insr; P20108:Prdx3; P27661:H2afx; P28659:Celf1; P30416:Fkbp4; P30681:Hmgb2; P32507:Nectin2; P35235:Ptpn11; P40240:Cd9; P49452:Cenpc; P…	E9Q5F9:Setd2; P27661:H2afx; P49452:Cenpc; P68181:Prkacb; P84244:H3f3a; P84244:H3f3b; Q3UA06:Trip13; Q80Y84:Kdm5b; Q8BH57:Wdr48; Q9QYS9:Qki
biological process	response to stimulus	35.14137334	36.07594937	A2A863:Itgb4; A2ABV5:Med14; A2ALU4:Shroom2; A2BH40:Arid1a; A6PWY4:Wdr76; B2RQC6:Cad; B2RXS4:Plxnb2; B9EKI3:Tmf1; D3YXK2:Safb; D3Z2R5:Selenon; E9PVA8:Gcn1; E9PVX6:Mki67; E9PZJ8:Ascc3; E9PZM4:Chd2; E9Q4P1:Wdfy1; E9Q557:Dsp; E9Q5F9:Setd2; E9Q6J5:Bod1l; F8VPU2:Farp1; G3X9J0:Sipa1l3; G5E829:Atp2b1; G5E870:Trip12; O08528:Hk2; O08529:Capn2; O08553:Dpysl2; O08599:Stxbp1; O08715:Akap1; O08915:Aip; O08997:…	E9PZJ8:Ascc3; E9Q5F9:Setd2; E9Q6J5:Bod1l; O08997:Atox1; O35368:Ifi203; P11352:Gpx1; P21550:Eno3; P22892:Ap1g1; P23798:Pcgf2; P27612:Plaa; P27661:H2afx; P28862:Mmp3; P49443:Ppm1a; P51943:Ccna2; P60766:Cdc42; P60898:Polr2i; P62627:Dynlrb1; P63213:Gng2; P68181:Prkacb; P70351:Ezh1; P84084:Arf5; Q3UA06:Trip13; Q3UMR5:Mcu; Q3UYH7:Adrbk2; Q61301:Ctnna2; Q61699:Hsph1; Q62371:Ddr2; Q63844:Mapk3; Q64127:Tr…
biological process	rhythmic process	0.923254472	0.632911392	P15066:Jund; P47856:Gfpt1; P55200:Kmt2a; P68040:Rack1; Q01320:Top2a; Q04750:Top1; Q569Z6:Thrap3; Q60520:Sin3a; Q60668:Hnrnpd; Q80Y84:Kdm5b; Q8CGY8:Ogt; Q8CIG8:Prmt5; Q8R326:Pspc1; Q8VDP4:Ccar2; Q8VIJ6:Sfpq; Q9Z103:Adnp	Q80Y84:Kdm5b
biological process	signaling	20.31159838	24.6835443	A2A863:Itgb4; A2ABV5:Med14; A2BH40:Arid1a; B2RXS4:Plxnb2; B9EKI3:Tmf1; D3YXK2:Safb; D3Z2R5:Selenon; D3Z7P3:Gls; E9Q4P1:Wdfy1; E9Q557:Dsp; F8VPU2:Farp1; G3X9J0:Sipa1l3; O08599:Stxbp1; O08715:Akap1; O08915:Aip; O09131:Gsto1; O35245:Pkd2; O35465:Fkbp8; O35566:Cd151; O35598:Adam10; O35864:Cops5; O54890:Itgb3; O54931:Akap2; O55106:Strn; O55143:Atp2a2; O55222:Ilk; O70572:Smpd2; O88327:Ctnnal1; O88554:P…	P11352:Gpx1; P23798:Pcgf2; P28862:Mmp3; P49443:Ppm1a; P51943:Ccna2; P60766:Cdc42; P63213:Gng2; P68181:Prkacb; P84084:Arf5; Q3UMR5:Mcu; Q3UYH7:Adrbk2; Q61699:Hsph1; Q62371:Ddr2; Q63844:Mapk3; Q64127:Trim24; Q6P069:Sri; Q6P9J9:Ano6; Q6PHZ2:Camk2d; Q6ZWY3:Rps27l; Q80SW1:Ahcyl1; Q80WQ6:Rhbdf2; Q80Y84:Kdm5b; Q80ZJ1:Rap2a; Q8BHJ5:Tbl1xr1; Q8BJU2:Tspan9; Q8BNY6:Ncs1; Q8BVP5:Csnk1g2; Q91VR8:Brk1; Q99K30:…
biological process	single-organism process	0	0	--	--
cellular component	cell	96.65320254	96.83544304	A2A6Q5:Cdc27; A2A863:Itgb4; A2ABV5:Med14; A2AIL4:Ndufaf6; A2AIV2:Virma; A2ALU4:Shroom2; A2AN08:Ubr4; A2APY7:Ndufaf5; A2BDX3:Mocs3; A2BE28:Las1l; A2BH40:Arid1a; A6H611:Mipep; A6PWY4:Wdr76; A6X919:Dpy19l1; B1AQJ2:Usp36; B1AXP6:Tomm5; B1AZI6:Thoc2; B2RQC6:Cad; B2RX12:Abcc3; B2RXS4:Plxnb2; B2RY56:Rbm25; B7ZMP1:Xpnpep3; B9EKI3:Tmf1; D3YXK2:Safb; D3Z2R5:Selenon; D3Z7P3:Gls; E9PVA8:Gcn1; E9PVX6:Mki67; E…	A2A6Q5:Cdc27; A2AN08:Ubr4; B7ZMP1:Xpnpep3; E9PZJ8:Ascc3; E9Q5F9:Setd2; E9Q6J5:Bod1l; E9Q784:Zc3h13; O08582:Gtpbp1; O08997:Atox1; O35114:Scarb2; O35368:Ifi203; O35972:Mrpl23; O70152:Dpm1; O70591:Pfdn2; O88574:Sap30; P11352:Gpx1; P15920:Atp6v0a2; P21550:Eno3; P22892:Ap1g1; P23798:Pcgf2; P27612:Plaa; P27661:H2afx; P28862:Mmp3; P40336:Vps26a; P45377:Akr1b8; P49443:Ppm1a; P49452:Cenpc; P51863:Atp6v0d1…
cellular component	cell junction	11.82919792	8.860759494	A2A863:Itgb4; A2ALU4:Shroom2; E9PVA8:Gcn1; E9Q557:Dsp; E9Q5G3:Kif23; F8VPU2:Farp1; G3X9J0:Sipa1l3; G5E829:Atp2b1; O08529:Capn2; O35114:Scarb2; O35245:Pkd2; O35566:Cd151; O35598:Adam10; O35685:Nudc; O35691:Pnn; O35864:Cops5; O54890:Itgb3; O55106:Strn; O55222:Ilk; O55242:Sigmar1; O88792:F11r; P09055:Itgb1; P10852:Slc3a2; P11679:Krt8; P15920:Atp6v0a2; P21981:Tgm2; P23242:Gja1; P26039:Tln1; P26041:Ms…	O35114:Scarb2; P15920:Atp6v0a2; P60766:Cdc42; Q61301:Ctnna2; Q62371:Ddr2; Q63844:Mapk3; Q6PHZ2:Camk2d; Q8BJU2:Tspan9; Q8BNY6:Ncs1; Q8C052:Map1s; Q99K01:Pdxdc1; Q99K30:Eps8l2; Q9D898:Arpc5l; Q9Z0G0:Gipc1
cellular component	cell part	96.53779573	96.20253165	A2A6Q5:Cdc27; A2A863:Itgb4; A2ABV5:Med14; A2AIL4:Ndufaf6; A2AIV2:Virma; A2ALU4:Shroom2; A2AN08:Ubr4; A2APY7:Ndufaf5; A2BDX3:Mocs3; A2BE28:Las1l; A2BH40:Arid1a; A6H611:Mipep; A6PWY4:Wdr76; A6X919:Dpy19l1; B1AQJ2:Usp36; B1AXP6:Tomm5; B1AZI6:Thoc2; B2RQC6:Cad; B2RX12:Abcc3; B2RXS4:Plxnb2; B2RY56:Rbm25; B7ZMP1:Xpnpep3; B9EKI3:Tmf1; D3YXK2:Safb; D3Z2R5:Selenon; D3Z7P3:Gls; E9PVA8:Gcn1; E9PVX6:Mki67; E…	A2A6Q5:Cdc27; A2AN08:Ubr4; B7ZMP1:Xpnpep3; E9PZJ8:Ascc3; E9Q5F9:Setd2; E9Q6J5:Bod1l; E9Q784:Zc3h13; O08582:Gtpbp1; O08997:Atox1; O35114:Scarb2; O35368:Ifi203; O35972:Mrpl23; O70152:Dpm1; O70591:Pfdn2; O88574:Sap30; P11352:Gpx1; P15920:Atp6v0a2; P21550:Eno3; P22892:Ap1g1; P23798:Pcgf2; P27612:Plaa; P27661:H2afx; P28862:Mmp3; P40336:Vps26a; P45377:Akr1b8; P49443:Ppm1a; P49452:Cenpc; P51863:Atp6v0d1…
cellular component	extracellular matrix	0.461627236	0	A2A863:Itgb4; O35566:Cd151; O88271:Cfdp1; P02463:Col4a1; Q05793:Hspg2; Q3V1T4:P3h1; Q61001:Lama5; Q8CG19:Ltbp1	--
cellular component	extracellular matrix part	0.173110214	0	P02463:Col4a1; Q61001:Lama5; Q8CG19:Ltbp1	--
cellular component	extracellular region	28.33237161	29.74683544	A2A863:Itgb4; A2ALU4:Shroom2; B2RQC6:Cad; B2RXS4:Plxnb2; B7ZMP1:Xpnpep3; E9PZM4:Chd2; E9Q557:Dsp; E9Q5G3:Kif23; G3X9J0:Sipa1l3; G5E829:Atp2b1; O08529:Capn2; O08553:Dpysl2; O08599:Stxbp1; O08807:Prdx4; O09131:Gsto1; O35114:Scarb2; O35245:Pkd2; O35459:Ech1; O35566:Cd151; O35593:Psmd14; O35598:Adam10; O54890:Itgb3; O54962:Banf1; O54984:Asna1; O55222:Ilk; O55234:Psmb5; O70126:Aurkb; O70274:Ptp4a2; O7…	B7ZMP1:Xpnpep3; O35114:Scarb2; O70591:Pfdn2; P11352:Gpx1; P21550:Eno3; P27612:Plaa; P27661:H2afx; P28862:Mmp3; P40336:Vps26a; P45377:Akr1b8; P51863:Atp6v0d1; P60766:Cdc42; P63213:Gng2; P68181:Prkacb; P84084:Arf5; P84244:H3f3a; P84244:H3f3b; Q61699:Hsph1; Q62371:Ddr2; Q63844:Mapk3; Q6P069:Sri; Q6P9J9:Ano6; Q7M759:Abhd17b; Q7TMY8:Huwe1; Q80SW1:Ahcyl1; Q80ZJ1:Rap2a; Q8BFZ3:Actbl2; Q8BNY6:Ncs1; Q8JZU…
cellular component	extracellular region part	27.69763416	28.48101266	A2A863:Itgb4; A2ALU4:Shroom2; B2RQC6:Cad; B2RXS4:Plxnb2; B7ZMP1:Xpnpep3; E9PZM4:Chd2; E9Q557:Dsp; E9Q5G3:Kif23; G3X9J0:Sipa1l3; G5E829:Atp2b1; O08529:Capn2; O08553:Dpysl2; O08599:Stxbp1; O08807:Prdx4; O09131:Gsto1; O35114:Scarb2; O35245:Pkd2; O35459:Ech1; O35566:Cd151; O35593:Psmd14; O35598:Adam10; O54890:Itgb3; O54962:Banf1; O54984:Asna1; O55222:Ilk; O55234:Psmb5; O70126:Aurkb; O70274:Ptp4a2; O7…	B7ZMP1:Xpnpep3; O35114:Scarb2; O70591:Pfdn2; P11352:Gpx1; P21550:Eno3; P27612:Plaa; P27661:H2afx; P28862:Mmp3; P40336:Vps26a; P45377:Akr1b8; P51863:Atp6v0d1; P60766:Cdc42; P63213:Gng2; P68181:Prkacb; P84084:Arf5; P84244:H3f3a; P84244:H3f3b; Q61699:Hsph1; Q62371:Ddr2; Q63844:Mapk3; Q6P069:Sri; Q6P9J9:Ano6; Q7TMY8:Huwe1; Q80SW1:Ahcyl1; Q80ZJ1:Rap2a; Q8BFZ3:Actbl2; Q8BNY6:Ncs1; Q8JZU2:Slc25a1; Q8R08…
cellular component	macromolecular complex	43.16214657	43.03797468	A2A6Q5:Cdc27; A2A863:Itgb4; A2ABV5:Med14; A2BE28:Las1l; A2BH40:Arid1a; B1AXP6:Tomm5; B1AZI6:Thoc2; B2RXS4:Plxnb2; B2RY56:Rbm25; E9PVA8:Gcn1; E9PZJ8:Ascc3; E9Q5G3:Kif23; O08547:Sec22b; O08582:Gtpbp1; O08583:Alyref; O08749:Dld; O08856:Ell; O08915:Aip; O35218:Cpsf2; O35226:Psmd4; O35245:Pkd2; O35295:Purb; O35593:Psmd14; O35680:Mrps12; O35691:Pnn; O35841:Api5; O35864:Cops5; O35972:Mrpl23; O54692:Zw10…	A2A6Q5:Cdc27; E9PZJ8:Ascc3; O08582:Gtpbp1; O35972:Mrpl23; O70152:Dpm1; O70591:Pfdn2; O88574:Sap30; P15920:Atp6v0a2; P21550:Eno3; P22892:Ap1g1; P23798:Pcgf2; P27661:H2afx; P40336:Vps26a; P49452:Cenpc; P51863:Atp6v0d1; P51943:Ccna2; P52432:Polr1c; P60766:Cdc42; P60898:Polr2i; P61025:Cks1b; P62309:Snrpg; P62315:Snrpd1; P62627:Dynlrb1; P63213:Gng2; P68181:Prkacb; P70351:Ezh1; P84244:H3f3a; P84244:H3f…
cellular component	membrane	51.99076746	45.56962025	A2A863:Itgb4; A2ABV5:Med14; A2AIL4:Ndufaf6; A2ALU4:Shroom2; A2AN08:Ubr4; A2APY7:Ndufaf5; A2BE28:Las1l; A6H619:Phrf1; A6X919:Dpy19l1; B1AXP6:Tomm5; B2RQC6:Cad; B2RX12:Abcc3; B2RXS4:Plxnb2; B9EKI3:Tmf1; D3Z2R5:Selenon; E9PVA8:Gcn1; E9PVX6:Mki67; E9PZJ8:Ascc3; E9Q557:Dsp; F8VPU2:Farp1; G3X9J0:Sipa1l3; G5E829:Atp2b1; O08528:Hk2; O08529:Capn2; O08547:Sec22b; O08553:Dpysl2; O08582:Gtpbp1; O08599:Stxbp1…	A2AN08:Ubr4; E9PZJ8:Ascc3; O08582:Gtpbp1; O35114:Scarb2; O35368:Ifi203; O70152:Dpm1; P15920:Atp6v0a2; P21550:Eno3; P22892:Ap1g1; P40336:Vps26a; P49443:Ppm1a; P51863:Atp6v0d1; P60766:Cdc42; P62627:Dynlrb1; P63213:Gng2; P68181:Prkacb; P70193:Lrig1; P84084:Arf5; Q3U4G3:Xxylt1; Q3UMR5:Mcu; Q61301:Ctnna2; Q62371:Ddr2; Q63844:Mapk3; Q6P069:Sri; Q6P9J9:Ano6; Q6P9P6:Kif11; Q6PHZ2:Camk2d; Q6ZWQ7:Spcs3; Q7…
cellular component	membrane part	30.98672822	32.91139241	A2A863:Itgb4; A2AIL4:Ndufaf6; A2ALU4:Shroom2; A2AN08:Ubr4; A2APY7:Ndufaf5; A6X919:Dpy19l1; B1AXP6:Tomm5; B2RX12:Abcc3; B2RXS4:Plxnb2; D3Z2R5:Selenon; E9Q557:Dsp; F8VPU2:Farp1; G3X9J0:Sipa1l3; G5E829:Atp2b1; O08529:Capn2; O08547:Sec22b; O08715:Akap1; O09005:Degs1; O35114:Scarb2; O35245:Pkd2; O35435:Dhodh; O35465:Fkbp8; O35566:Cd151; O35598:Adam10; O54692:Zw10; O54724:Cavin1; O54890:Itgb3; O55029:C…	A2AN08:Ubr4; O35114:Scarb2; O70152:Dpm1; P15920:Atp6v0a2; P22892:Ap1g1; P40336:Vps26a; P51863:Atp6v0d1; P60766:Cdc42; P63213:Gng2; P70193:Lrig1; Q3U4G3:Xxylt1; Q3UMR5:Mcu; Q61301:Ctnna2; Q62371:Ddr2; Q63844:Mapk3; Q6P069:Sri; Q6P9J9:Ano6; Q6PHZ2:Camk2d; Q6ZWQ7:Spcs3; Q80SW1:Ahcyl1; Q80TN4:Dnajc16; Q80V26:Impad1; Q80WQ6:Rhbdf2; Q8BGK6:Slc7a6; Q8BJU2:Tspan9; Q8BNY6:Ncs1; Q8BS95:Gpr89a; Q8C0E2:Vps26…
cellular component	membrane-enclosed lumen	43.39296018	35.44303797	A2A6Q5:Cdc27; A2ABV5:Med14; A2AIV2:Virma; A2AN08:Ubr4; A2BE28:Las1l; A2BH40:Arid1a; A6H611:Mipep; B1AQJ2:Usp36; B1AZI6:Thoc2; B2RQC6:Cad; B2RY56:Rbm25; D3YXK2:Safb; D3Z7P3:Gls; E9PVX6:Mki67; E9PZM4:Chd2; E9Q5G3:Kif23; E9Q5K9:Ythdc1; E9Q6J5:Bod1l; E9Q784:Zc3h13; F7BJB9:Morc3; G5E870:Trip12; O08583:Alyref; O08599:Stxbp1; O08749:Dld; O08784:Tcof1; O08856:Ell; O08915:Aip; O35114:Scarb2; O35218:Cpsf2;…	A2A6Q5:Cdc27; A2AN08:Ubr4; E9Q6J5:Bod1l; E9Q784:Zc3h13; O35114:Scarb2; O35368:Ifi203; O35972:Mrpl23; O70591:Pfdn2; O88574:Sap30; P23798:Pcgf2; P27661:H2afx; P49452:Cenpc; P51943:Ccna2; P52432:Polr1c; P55264:Adk; P60898:Polr2i; P70351:Ezh1; P84244:H3f3a; P84244:H3f3b; Q3TQI7:; Q3UFM5:Nom1; Q61699:Hsph1; Q63844:Mapk3; Q64127:Trim24; Q6P069:Sri; Q7TMY8:Huwe1; Q7TSZ8:Nacc1; Q8BGC0:Htatsf1; Q8BHE8:Mai…
cellular component	mitochondrion-associated adherens complex	0	0	--	--
cellular component	nucleoid	1.269474899	0	P38647:Hspa9; P50544:Acadvl; P56480:Atp5f1b; Q3UFY8:Trmt10c; Q5SSK3:Tefm; Q60930:Vdac2; Q6PB66:Lrpprc; Q7TMV3:Fastkd5; Q80YD1:Supv3l1; Q8BFR5:Tufm; Q8BMS1:Hadha; Q8CGK3:Lonp1; Q8CIW5:Twnk; Q8JZM0:Tfb1m; Q91VA6:Poldip2; Q922E6:Fastkd2; Q922Q8:Lrrc59; Q925I1:Atad3; Q99JY0:Hadhb; Q9CQY6:Uqcc2; Q9CWT6:Ddx28; Q9JHS4:Clpx	--
cellular component	organelle	92.72937103	91.13924051	A2A6Q5:Cdc27; A2A863:Itgb4; A2ABV5:Med14; A2AIL4:Ndufaf6; A2AIV2:Virma; A2ALU4:Shroom2; A2AN08:Ubr4; A2APY7:Ndufaf5; A2BE28:Las1l; A2BH40:Arid1a; A6H611:Mipep; A6PWY4:Wdr76; A6X919:Dpy19l1; B1AQJ2:Usp36; B1AXP6:Tomm5; B1AZI6:Thoc2; B2RQC6:Cad; B2RXS4:Plxnb2; B2RY56:Rbm25; B7ZMP1:Xpnpep3; B9EKI3:Tmf1; D3YXK2:Safb; D3Z2R5:Selenon; D3Z7P3:Gls; E9PVX6:Mki67; E9PZJ8:Ascc3; E9PZM4:Chd2; E9Q1P8:Irf2bp2;…	A2A6Q5:Cdc27; A2AN08:Ubr4; B7ZMP1:Xpnpep3; E9PZJ8:Ascc3; E9Q5F9:Setd2; E9Q6J5:Bod1l; E9Q784:Zc3h13; O35114:Scarb2; O35368:Ifi203; O35972:Mrpl23; O70152:Dpm1; O70591:Pfdn2; O88574:Sap30; P11352:Gpx1; P15920:Atp6v0a2; P21550:Eno3; P22892:Ap1g1; P23798:Pcgf2; P27612:Plaa; P27661:H2afx; P28862:Mmp3; P40336:Vps26a; P45377:Akr1b8; P49443:Ppm1a; P49452:Cenpc; P51863:Atp6v0d1; P51943:Ccna2; P52432:Polr1c…
cellular component	organelle part	71.89844201	61.39240506	A2A6Q5:Cdc27; A2ABV5:Med14; A2AIL4:Ndufaf6; A2AIV2:Virma; A2ALU4:Shroom2; A2AN08:Ubr4; A2APY7:Ndufaf5; A2BE28:Las1l; A2BH40:Arid1a; A6H611:Mipep; A6X919:Dpy19l1; B1AQJ2:Usp36; B1AXP6:Tomm5; B1AZI6:Thoc2; B2RQC6:Cad; B2RY56:Rbm25; B9EKI3:Tmf1; D3YXK2:Safb; D3Z2R5:Selenon; D3Z7P3:Gls; E9PVX6:Mki67; E9PZM4:Chd2; E9Q5G3:Kif23; E9Q5K9:Ythdc1; E9Q6J5:Bod1l; E9Q784:Zc3h13; F7BJB9:Morc3; G3X9J0:Sipa1l3; …	A2A6Q5:Cdc27; A2AN08:Ubr4; E9Q6J5:Bod1l; E9Q784:Zc3h13; O35114:Scarb2; O35368:Ifi203; O35972:Mrpl23; O70152:Dpm1; O70591:Pfdn2; O88574:Sap30; P15920:Atp6v0a2; P22892:Ap1g1; P23798:Pcgf2; P27661:H2afx; P40336:Vps26a; P49452:Cenpc; P51863:Atp6v0d1; P51943:Ccna2; P52432:Polr1c; P55264:Adk; P60766:Cdc42; P60898:Polr2i; P62309:Snrpg; P62315:Snrpd1; P62627:Dynlrb1; P68181:Prkacb; P70351:Ezh1; P84244:H3…
cellular component	symplast	0	0	--	--
cellular component	synapse	4.09694172	5.063291139	B2RQC6:Cad; F8VPU2:Farp1; G5E829:Atp2b1; O08553:Dpysl2; O08599:Stxbp1; O35598:Adam10; O35864:Cops5; O55106:Strn; O55143:Atp2a2; O55222:Ilk; O55242:Sigmar1; O88587:Comt; P05201:Got1; P09055:Itgb1; P11881:Itpr1; P26883:Fkbp1a; P27546:Map4; P31324:Prkar2b; P42208:Septin2; P51791:Clcn3; P51863:Atp6v0d1; P54763:Ephb2; P60904:Dnajc5; P61967:Ap1s1; P63024:Vamp3; P63166:Sumo1; P70280:Vamp7; P70452:Stx4; …	P51863:Atp6v0d1; Q61301:Ctnna2; Q6P069:Sri; Q6PHZ2:Camk2d; Q8BNY6:Ncs1; Q8C052:Map1s; Q9ERB0:Snap29; Q9Z0G0:Gipc1
cellular component	synapse part	3.231390652	3.797468354	B2RQC6:Cad; F8VPU2:Farp1; G5E829:Atp2b1; O08553:Dpysl2; O08599:Stxbp1; O35598:Adam10; O35864:Cops5; O55106:Strn; O55222:Ilk; O55242:Sigmar1; O88587:Comt; P05201:Got1; P09055:Itgb1; P11881:Itpr1; P26883:Fkbp1a; P27546:Map4; P31324:Prkar2b; P51791:Clcn3; P51863:Atp6v0d1; P60904:Dnajc5; P61967:Ap1s1; P70452:Stx4; P97300:Nptn; Q08509:Eps8; Q2TBE6:Pi4k2a; Q60598:Cttn; Q60930:Vdac2; Q61301:Ctnna2; Q615…	P51863:Atp6v0d1; Q61301:Ctnna2; Q6P069:Sri; Q8BNY6:Ncs1; Q9ERB0:Snap29; Q9Z0G0:Gipc1
cellular component	virion	0	0	--	--
cellular component	virion part	0	0	--	--
molecular function	D-alanyl carrier activity	0	0	--	--
molecular function	antioxidant activity	0.980957877	1.898734177	O08807:Prdx4; O09131:Gsto1; P08228:Sod1; P10639:Txn; P11352:Gpx1; P19157:Gstp1; P20108:Prdx3; P35700:Prdx1; P97346:Nxn; Q05769:Ptgs2; Q61171:Prdx2; Q99LX0:Park7; Q9CPU4:Mgst3; Q9CQM5:Txndc17; Q9CYH2:Prxl2a; Q9D7B7:Gpx8; Q9JMH6:Txnrd1	P11352:Gpx1; Q9CPU4:Mgst3; Q9CYH2:Prxl2a
molecular function	binding	66.87824582	66.4556962	A2A6Q5:Cdc27; A2A863:Itgb4; A2ALU4:Shroom2; A2AN08:Ubr4; A2BDX3:Mocs3; A2BH40:Arid1a; A6H611:Mipep; A6H619:Phrf1; A6PWY4:Wdr76; B1AZI6:Thoc2; B2RQC6:Cad; B2RX12:Abcc3; B2RY56:Rbm25; B7ZMP1:Xpnpep3; B9EKI3:Tmf1; D3YXK2:Safb; D3Z2R5:Selenon; E9PVA8:Gcn1; E9PVX6:Mki67; E9PZJ8:Ascc3; E9PZM4:Chd2; E9Q1P8:Irf2bp2; E9Q4P1:Wdfy1; E9Q557:Dsp; E9Q5G3:Kif23; E9Q5K9:Ythdc1; E9Q6J5:Bod1l; E9Q784:Zc3h13; F7BJB…	A2A6Q5:Cdc27; A2AN08:Ubr4; B7ZMP1:Xpnpep3; E9PZJ8:Ascc3; E9Q6J5:Bod1l; E9Q784:Zc3h13; O08582:Gtpbp1; O08997:Atox1; O35114:Scarb2; O35368:Ifi203; O35972:Mrpl23; O70591:Pfdn2; O88574:Sap30; P11352:Gpx1; P15920:Atp6v0a2; P21550:Eno3; P22892:Ap1g1; P23798:Pcgf2; P27612:Plaa; P27661:H2afx; P28862:Mmp3; P49443:Ppm1a; P49452:Cenpc; P51943:Ccna2; P52432:Polr1c; P55264:Adk; P60766:Cdc42; P60898:Polr2i; P6…
molecular function	catalytic activity	38.66128102	41.13924051	A2AIL4:Ndufaf6; A2AN08:Ubr4; A2APY7:Ndufaf5; A2BDX3:Mocs3; A6H611:Mipep; A6X919:Dpy19l1; B1AQJ2:Usp36; B2RQC6:Cad; B2RX12:Abcc3; B7ZMP1:Xpnpep3; D3Z2R5:Selenon; D3Z7P3:Gls; E9PZJ8:Ascc3; E9PZM4:Chd2; E9Q5F9:Setd2; E9Q5G3:Kif23; G5E829:Atp2b1; G5E870:Trip12; O08528:Hk2; O08529:Capn2; O08553:Dpysl2; O08582:Gtpbp1; O08749:Dld; O08807:Prdx4; O09005:Degs1; O09131:Gsto1; O35435:Dhodh; O35459:Ech1; O354…	A2AN08:Ubr4; B7ZMP1:Xpnpep3; E9PZJ8:Ascc3; E9Q5F9:Setd2; O08582:Gtpbp1; O70152:Dpm1; O88574:Sap30; P11352:Gpx1; P15920:Atp6v0a2; P21550:Eno3; P28862:Mmp3; P45377:Akr1b8; P49443:Ppm1a; P51863:Atp6v0d1; P51943:Ccna2; P52432:Polr1c; P55264:Adk; P60766:Cdc42; P60898:Polr2i; P62627:Dynlrb1; P63213:Gng2; P68181:Prkacb; P70351:Ezh1; Q3U4G3:Xxylt1; Q3URE1:Acsf3; Q3UYH7:Adrbk2; Q62371:Ddr2; Q63844:Mapk3; …
molecular function	channel regulator activity	0.519330641	0.632911392	O88983:Stx8; P11881:Itpr1; P56212:Arpp19; P63166:Sumo1; P68040:Rack1; P68510:Ywhah; P70302:Stim1; Q6PHZ2:Camk2d; Q810S1:Mcub	Q6PHZ2:Camk2d
molecular function	chemoattractant activity	0	0	--	--
molecular function	chemorepellent activity	0	0	--	--
molecular function	electron carrier activity	0.807847663	0	P12787:Cox5a; P17665:Cox7c; P43024:Cox6a1; P48771:Cox7a2; P56391:Cox6b1; P99028:Uqcrh; Q62425:Ndufa4; Q8BGD8:Coa6; Q8BJ03:Cox15; Q8BUE4:Aifm2; Q9CPQ1:Cox6c; Q9CQ69:Uqcrq; Q9CR68:Uqcrfs1; Q9D0M3:Cyc1	--
molecular function	enzyme regulator activity	4.385458742	4.430379747	E9PVA8:Gcn1; G3X9J0:Sipa1l3; O35593:Psmd14; O54946:Dnajb6; P01027:C3; P14685:Psmd3; P19157:Gstp1; P20108:Prdx3; P27612:Plaa; P31324:Prkar2b; P34022:Ranbp1; P42208:Septin2; P43024:Cox6a1; P56212:Arpp19; P61025:Cks1b; P63168:Dynll1; P68040:Rack1; P70452:Stx4; P70677:Casp3; P97822:Anp32e; Q01853:Vcp; Q06138:Cab39; Q3TDN2:Faf2; Q3THK3:Gtf2f1; Q3TXS7:Psmd1; Q5FWK3:Arhgap1; Q5SSK3:Tefm; Q61081:Cdc37; Q…	P27612:Plaa; P61025:Cks1b; Q6ZWY3:Rps27l; Q8K1L5:Ppp1r11; Q9CZX5:Pinx1; Q9QZQ8:H2afy; Q9Z0G0:Gipc1
molecular function	metallochaperone activity	0.115406809	0.632911392	O08997:Atox1; Q99LX0:Park7	O08997:Atox1
molecular function	molecular transducer activity	0.980957877	1.898734177	B2RXS4:Plxnb2; O55242:Sigmar1; P15208:Insr; P51943:Ccna2; P54763:Ephb2; P68181:Prkacb; P70206:Plxna1; P97300:Nptn; Q03145:Epha2; Q14AX6:Cdk12; Q61009:Scarb1; Q62371:Ddr2; Q62469:Itga2; Q69ZA1:Cdk13; Q8BKG3:Ptk7; Q99J95:Cdk9; Q9QZM4:Tnfrsf10b	P51943:Ccna2; P68181:Prkacb; Q62371:Ddr2
molecular function	morphogen activity	0	0	--	--
molecular function	nucleic acid binding transcription factor activity	0	0	--	--
molecular function	nutrient reservoir activity	0	0	--	--
molecular function	protein binding transcription factor activity	0	0	--	--
molecular function	protein tag	0.057703405	0	P63166:Sumo1	--
molecular function	receptor activity	0	0	--	--
molecular function	receptor regulator activity	0.230813618	0	P30681:Hmgb2; P51859:Hdgf; P98063:Bmp1; Q9CQ45:Nenf	--
molecular function	structural molecule activity	5.712637046	5.063291139	E9Q557:Dsp; O35680:Mrps12; O35972:Mrpl23; O55029:Copb2; P02463:Col4a1; P05213:Tuba1b; P11679:Krt8; P14115:Rpl27a; P14733:Lmnb1; P21619:Lmnb2; P26039:Tln1; P36552:Cpox; P42208:Septin2; P47963:Rpl13; P48678:Lmna; P62274:Rps29; P62717:Rpl18a; P62830:Rpl23; P62843:Rps15; P62911:Rpl32; P62918:Rpl8; P68368:Tuba4a; P68372:Tubb4b; P99024:Tubb5; P99027:Rplp2; Q02257:Jup; Q3TBW2:Mrpl10; Q61301:Ctnna2; Q617…	O35972:Mrpl23; Q61301:Ctnna2; Q6ZWY3:Rps27l; Q9CPY1:Mrpl51; Q9CQF8:Mrpl57; Q9D0G0:Mrps30; Q9D1B9:Mrpl28; Q9Z1P6:Ndufa7
molecular function	translation regulator activity	0.288517023	0.632911392	P42669:Pura; P60335:Pcbp1; P60824:Cirbp; Q6ZWN5:Rps9; Q6ZWY3:Rps27l	Q6ZWY3:Rps27l
molecular function	transporter activity	5.539526832	9.493670886	A2AIL4:Ndufaf6; B2RX12:Abcc3; G5E829:Atp2b1; O08997:Atox1; O35245:Pkd2; O55143:Atp2a2; O70579:Slc25a17; P10852:Slc3a2; P11881:Itpr1; P12787:Cox5a; P15920:Atp6v0a2; P17426:Ap2a1; P17665:Cox7c; P22892:Ap1g1; P23242:Gja1; P32020:Scp2; P36552:Cpox; P40336:Vps26a; P43024:Cox6a1; P48771:Cox7a2; P48962:Slc25a4; P49282:Slc11a2; P50516:Atp6v1a; P50518:Atp6v1e1; P51791:Clcn3; P51863:Atp6v0d1; P56391:Cox6b1…	O08997:Atox1; P15920:Atp6v0a2; P22892:Ap1g1; P40336:Vps26a; P51863:Atp6v0d1; Q3UMR5:Mcu; Q6P9J9:Ano6; Q8BGK6:Slc7a6; Q8BNY6:Ncs1; Q8BS95:Gpr89a; Q8C0E2:Vps26b; Q8C145:Slc39a6; Q9CPQ8:Atp5mg; Q9CWU2:Zdhhc13; Q9D8Z2:Triap1
