# Supplementary material for: Sublethal heat treatment promotes breast cancer metastasis and its molecular mechanism revealed by quantitative proteomic analysis
Source: Aging (Albany NY). 2022 Feb 12;14(3):1389–406. doi: 10.18632/aging.203884 (PMC8876919; doi:10.18632/aging.203884)
Supplement: Supplementary Table 5 [file aging-14-203884-s005.xls]

Supplementary Table 5. Up_vs_down.GO.level2.stat.
#GO_classify1	GO_classify2	diff-Up	diff-Down	Gene(diff-Up)	Gene(diff-Down)
#Total_gene		83	75
biological process	biological adhesion	1.204819277	1.333333333	Q61699:Hsph1	P60766:Cdc42
biological process	biological regulation	57.8313253	61.33333333	A2A6Q5:Cdc27; E9PZJ8:Ascc3; E9Q5F9:Setd2; O08582:Gtpbp1; O70591:Pfdn2; O88574:Sap30; P23798:Pcgf2; P27612:Plaa; P49443:Ppm1a; P52432:Polr1c; P84084:Arf5; P84244:H3f3a; P84244:H3f3b; Q61699:Hsph1; Q63844:Mapk3; Q6P9J9:Ano6; Q6P9P6:Kif11; Q6ZWY3:Rps27l; Q80SW1:Ahcyl1; Q80TN4:Dnajc16; Q80Y84:Kdm5b; Q8BGC0:Htatsf1; Q8BH57:Wdr48; Q8BHJ5:Tbl1xr1; Q8BNY6:Ncs1; Q8BS95:Gpr89a; Q8C052:Map1s; Q8CFE2:Hpf1; Q…	O08997:Atox1; O35114:Scarb2; P11352:Gpx1; P15920:Atp6v0a2; P22892:Ap1g1; P27661:H2afx; P28862:Mmp3; P51863:Atp6v0d1; P51943:Ccna2; P60766:Cdc42; P61025:Cks1b; P63213:Gng2; P68181:Prkacb; P70351:Ezh1; Q3UMR5:Mcu; Q3USH5:Sfswap; Q3UYH7:Adrbk2; Q61301:Ctnna2; Q62371:Ddr2; Q64127:Trim24; Q6NZQ6:Znf740; Q6P069:Sri; Q6PHZ2:Camk2d; Q7TMY8:Huwe1; Q7TSZ8:Nacc1; Q80WQ6:Rhbdf2; Q80ZJ1:Rap2a; Q8BHE8:Maip1; Q…
biological process	cell killing	0	1.333333333	--	P22892:Ap1g1
biological process	cellular component organization or biogenesis	43.37349398	37.33333333	A2A6Q5:Cdc27; E9PZJ8:Ascc3; E9Q5F9:Setd2; O70591:Pfdn2; O88574:Sap30; P23798:Pcgf2; P49443:Ppm1a; P49452:Cenpc; P52432:Polr1c; P62315:Snrpd1; P84244:H3f3a; P84244:H3f3b; Q3UA06:Trip13; Q3UFM5:Nom1; Q61699:Hsph1; Q63844:Mapk3; Q6P9J9:Ano6; Q6P9P6:Kif11; Q6ZWY3:Rps27l; Q80Y84:Kdm5b; Q8BHJ5:Tbl1xr1; Q8BNY6:Ncs1; Q8C052:Map1s; Q8VBU8:Banp; Q91YU8:Ppan; Q922U1:Prpf3; Q99K30:Eps8l2; Q99LL5:Pwp1; Q9CQU3…	O35114:Scarb2; P11352:Gpx1; P15920:Atp6v0a2; P27661:H2afx; P28862:Mmp3; P51863:Atp6v0d1; P60766:Cdc42; P62309:Snrpg; P70351:Ezh1; Q3USH5:Sfswap; Q61301:Ctnna2; Q62371:Ddr2; Q6PHZ2:Camk2d; Q7TMY8:Huwe1; Q7TSZ8:Nacc1; Q80ZJ1:Rap2a; Q8BHE8:Maip1; Q8BVP5:Csnk1g2; Q8K0D7:Wrb; Q91VR8:Brk1; Q91VT4:Cbr4; Q91W18:Tdrd3; Q9CWE0:Mtfr1l; Q9CWU6:Uqcc1; Q9CWV0:Malsu1; Q9ERB0:Snap29; Q9ERS2:Ndufa13; Q9QZQ8:H2afy
biological process	cellular process	85.54216867	81.33333333	A2A6Q5:Cdc27; E9PZJ8:Ascc3; E9Q5F9:Setd2; E9Q6J5:Bod1l; O08582:Gtpbp1; O35368:Ifi203; O35972:Mrpl23; O70152:Dpm1; O70591:Pfdn2; O88574:Sap30; P23798:Pcgf2; P27612:Plaa; P45377:Akr1b8; P49443:Ppm1a; P49452:Cenpc; P52432:Polr1c; P55264:Adk; P60898:Polr2i; P62315:Snrpd1; P62627:Dynlrb1; P84084:Arf5; P84244:H3f3a; P84244:H3f3b; Q3UA06:Trip13; Q3UFM5:Nom1; Q61699:Hsph1; Q63844:Mapk3; Q6P9J9:Ano6; Q6P9…	O08997:Atox1; O35114:Scarb2; P11352:Gpx1; P15920:Atp6v0a2; P21550:Eno3; P22892:Ap1g1; P27661:H2afx; P28862:Mmp3; P51863:Atp6v0d1; P51943:Ccna2; P60766:Cdc42; P61025:Cks1b; P62309:Snrpg; P63213:Gng2; P68181:Prkacb; P70351:Ezh1; Q3U4G3:Xxylt1; Q3UMR5:Mcu; Q3URE1:Acsf3; Q3USH5:Sfswap; Q3UYH7:Adrbk2; Q61301:Ctnna2; Q62371:Ddr2; Q64127:Trim24; Q6NZQ6:Znf740; Q6P069:Sri; Q6PHZ2:Camk2d; Q6ZWQ7:Spcs3; Q7…
biological process	developmental process	27.71084337	29.33333333	E9Q5F9:Setd2; O88574:Sap30; P23798:Pcgf2; P84244:H3f3a; P84244:H3f3b; Q3UA06:Trip13; Q3UFM5:Nom1; Q63844:Mapk3; Q6P9J9:Ano6; Q80V26:Impad1; Q80Y84:Kdm5b; Q8BH57:Wdr48; Q8BHJ5:Tbl1xr1; Q8BNY6:Ncs1; Q8BS95:Gpr89a; Q8C052:Map1s; Q8VBU8:Banp; Q99LL5:Pwp1; Q9D6K5:Synj2bp; Q9EQ80:Nif3l1; Q9JJF3:Riox1; Q9QUM9:Psma6; Q9QYS9:Qki	O35114:Scarb2; P11352:Gpx1; P21550:Eno3; P22892:Ap1g1; P27661:H2afx; P51863:Atp6v0d1; P51943:Ccna2; P60766:Cdc42; P68181:Prkacb; P70193:Lrig1; P70351:Ezh1; Q61301:Ctnna2; Q62371:Ddr2; Q6P069:Sri; Q6PHZ2:Camk2d; Q7TMY8:Huwe1; Q80ZJ1:Rap2a; Q8BVP5:Csnk1g2; Q91VR8:Brk1; Q9CYH2:Prxl2a; Q9D1M4:Eef1e1; Q9QZQ8:H2afy
biological process	establishment of localization	28.91566265	30.66666667	E9Q5F9:Setd2; P40336:Vps26a; P49443:Ppm1a; P49452:Cenpc; P62627:Dynlrb1; P84084:Arf5; Q61699:Hsph1; Q63844:Mapk3; Q6P9J9:Ano6; Q80SW1:Ahcyl1; Q80Y84:Kdm5b; Q8BNY6:Ncs1; Q8BS95:Gpr89a; Q8C0E2:Vps26b; Q8JZU2:Slc25a1; Q99LJ0:Cttnbp2nl; Q9CPQ8:Atp5mg; Q9CQU3:Rer1; Q9CZX5:Pinx1; Q9D6K5:Synj2bp; Q9D8Z2:Triap1; Q9QYE6:Golga5; Q9QYS9:Qki; Q9WV96:Timm10b	O08997:Atox1; O35114:Scarb2; P15920:Atp6v0a2; P22892:Ap1g1; P51863:Atp6v0d1; P60766:Cdc42; Q3UMR5:Mcu; Q3UYH7:Adrbk2; Q6P069:Sri; Q6PHZ2:Camk2d; Q7TMY8:Huwe1; Q80WQ6:Rhbdf2; Q80ZJ1:Rap2a; Q8BHE8:Maip1; Q8BVP5:Csnk1g2; Q8C145:Slc39a6; Q8K0D7:Wrb; Q9CR26:Vta1; Q9D023:Mpc2; Q9ERB0:Snap29; Q9ERS2:Ndufa13; Q9QZQ8:H2afy; Q9Z0G0:Gipc1
biological process	growth	7.228915663	9.333333333	P84244:H3f3a; P84244:H3f3b; Q80Y84:Kdm5b; Q8BH57:Wdr48; Q8BHJ5:Tbl1xr1; Q91YU8:Ppan	P11352:Gpx1; P21550:Eno3; P60766:Cdc42; Q62371:Ddr2; Q6PHZ2:Camk2d; Q9ERS2:Ndufa13; Q9JHS3:Lamtor2
biological process	immune system process	4.819277108	5.333333333	Q61699:Hsph1; Q63844:Mapk3; Q6P9J9:Ano6; Q9QUM9:Psma6	P11352:Gpx1; P22892:Ap1g1; P60766:Cdc42; Q9CYH2:Prxl2a
biological process	localization	31.3253012	40	E9Q5F9:Setd2; P40336:Vps26a; P49443:Ppm1a; P49452:Cenpc; P62627:Dynlrb1; P84084:Arf5; Q61699:Hsph1; Q63844:Mapk3; Q6P9J9:Ano6; Q80SW1:Ahcyl1; Q80Y84:Kdm5b; Q8BNY6:Ncs1; Q8BS95:Gpr89a; Q8C0E2:Vps26b; Q8JZU2:Slc25a1; Q8VBU8:Banp; Q99LJ0:Cttnbp2nl; Q9CPQ8:Atp5mg; Q9CQU3:Rer1; Q9CZX5:Pinx1; Q9D6K5:Synj2bp; Q9D898:Arpc5l; Q9D8Z2:Triap1; Q9QYE6:Golga5; Q9QYS9:Qki; Q9WV96:Timm10b	O08997:Atox1; O35114:Scarb2; P11352:Gpx1; P15920:Atp6v0a2; P22892:Ap1g1; P28862:Mmp3; P51863:Atp6v0d1; P60766:Cdc42; Q3UMR5:Mcu; Q3UYH7:Adrbk2; Q61301:Ctnna2; Q62371:Ddr2; Q6P069:Sri; Q6PHZ2:Camk2d; Q7TMY8:Huwe1; Q80WQ6:Rhbdf2; Q80ZJ1:Rap2a; Q8BHE8:Maip1; Q8BVP5:Csnk1g2; Q8C145:Slc39a6; Q8K0D7:Wrb; Q91VR8:Brk1; Q9CR26:Vta1; Q9CXY9:Pigk; Q9D023:Mpc2; Q9ERB0:Snap29; Q9ERS2:Ndufa13; Q9JHS3:Lamtor2; …
biological process	locomotion	4.819277108	12	E9Q5F9:Setd2; Q6P9J9:Ano6; Q9D6K5:Synj2bp; Q9D898:Arpc5l	P11352:Gpx1; P28862:Mmp3; P60766:Cdc42; Q61301:Ctnna2; Q62371:Ddr2; Q6PHZ2:Camk2d; Q80ZJ1:Rap2a; Q91VR8:Brk1; Q9Z0G0:Gipc1
biological process	metabolic process	65.06024096	69.33333333	A2A6Q5:Cdc27; E9PZJ8:Ascc3; E9Q5F9:Setd2; E9Q6J5:Bod1l; O08582:Gtpbp1; O35972:Mrpl23; O70152:Dpm1; O88574:Sap30; P23798:Pcgf2; P27612:Plaa; P45377:Akr1b8; P49443:Ppm1a; P52432:Polr1c; P55264:Adk; P60898:Polr2i; P62315:Snrpd1; P84244:H3f3a; P84244:H3f3b; Q3UA06:Trip13; Q61699:Hsph1; Q63844:Mapk3; Q6ZWY3:Rps27l; Q80SW1:Ahcyl1; Q80V26:Impad1; Q80Y84:Kdm5b; Q8BGC0:Htatsf1; Q8BH57:Wdr48; Q8BHJ5:Tbl1xr…	B7ZMP1:Xpnpep3; O08997:Atox1; P11352:Gpx1; P15920:Atp6v0a2; P21550:Eno3; P27661:H2afx; P28862:Mmp3; P51943:Ccna2; P60766:Cdc42; P61025:Cks1b; P62309:Snrpg; P68181:Prkacb; P70351:Ezh1; Q3U4G3:Xxylt1; Q3URE1:Acsf3; Q3USH5:Sfswap; Q3UYH7:Adrbk2; Q62371:Ddr2; Q64127:Trim24; Q6NZQ6:Znf740; Q6P069:Sri; Q6PHZ2:Camk2d; Q6ZWQ7:Spcs3; Q7TMY8:Huwe1; Q7TSZ8:Nacc1; Q80WQ6:Rhbdf2; Q80ZJ1:Rap2a; Q8BHG9:Cggbp1; …
biological process	multi-organism process	8.43373494	5.333333333	P84244:H3f3a; P84244:H3f3b; Q3UA06:Trip13; Q63844:Mapk3; Q80Y84:Kdm5b; Q8BH57:Wdr48; Q9QYS9:Qki	P11352:Gpx1; P27661:H2afx; P60766:Cdc42; Q9CR26:Vta1
biological process	multicellular organismal process	27.71084337	26.66666667	E9Q5F9:Setd2; O88574:Sap30; P23798:Pcgf2; P62627:Dynlrb1; P84244:H3f3a; P84244:H3f3b; Q3UA06:Trip13; Q3UFM5:Nom1; Q63844:Mapk3; Q6P9J9:Ano6; Q80V26:Impad1; Q80Y84:Kdm5b; Q8BH57:Wdr48; Q8BHJ5:Tbl1xr1; Q8BNY6:Ncs1; Q8BS95:Gpr89a; Q8C052:Map1s; Q8VBU8:Banp; Q9D6K5:Synj2bp; Q9EQ80:Nif3l1; Q9JJF3:Riox1; Q9QUM9:Psma6; Q9QYS9:Qki	B7ZMP1:Xpnpep3; O35114:Scarb2; P11352:Gpx1; P27661:H2afx; P51863:Atp6v0d1; P51943:Ccna2; P60766:Cdc42; P68181:Prkacb; P70193:Lrig1; P70351:Ezh1; Q61301:Ctnna2; Q62371:Ddr2; Q6P069:Sri; Q6PHZ2:Camk2d; Q80ZJ1:Rap2a; Q91VR8:Brk1; Q9CYH2:Prxl2a; Q9D1M4:Eef1e1; Q9QZQ8:H2afy; Q9Z0G0:Gipc1
biological process	negative regulation of biological process	25.30120482	26.66666667	O08582:Gtpbp1; O88574:Sap30; P23798:Pcgf2; P49443:Ppm1a; P52432:Polr1c; P84244:H3f3a; P84244:H3f3b; Q61699:Hsph1; Q6ZWY3:Rps27l; Q80Y84:Kdm5b; Q8BHJ5:Tbl1xr1; Q8K1L5:Ppp1r11; Q8K3A9:Mepce; Q8VBU8:Banp; Q99LJ0:Cttnbp2nl; Q9CZX5:Pinx1; Q9D6K5:Synj2bp; Q9D8Z2:Triap1; Q9EQ80:Nif3l1; Q9JJF3:Riox1; Q9QYS9:Qki	P11352:Gpx1; P27661:H2afx; P28862:Mmp3; P60766:Cdc42; P68181:Prkacb; P70351:Ezh1; Q3USH5:Sfswap; Q61301:Ctnna2; Q64127:Trim24; Q6P069:Sri; Q6PHZ2:Camk2d; Q7TSZ8:Nacc1; Q80WQ6:Rhbdf2; Q80ZJ1:Rap2a; Q8BHG9:Cggbp1; Q9CWV0:Malsu1; Q9D1M4:Eef1e1; Q9ERS2:Ndufa13; Q9QZQ8:H2afy; Q9Z0G0:Gipc1
biological process	positive regulation of biological process	28.91566265	32	O08582:Gtpbp1; O70591:Pfdn2; P49443:Ppm1a; P84244:H3f3a; P84244:H3f3b; Q61699:Hsph1; Q63844:Mapk3; Q6P9J9:Ano6; Q80SW1:Ahcyl1; Q80Y84:Kdm5b; Q8BH57:Wdr48; Q8BHJ5:Tbl1xr1; Q8BNY6:Ncs1; Q8K3A9:Mepce; Q8VBU8:Banp; Q99K30:Eps8l2; Q99LL5:Pwp1; Q9CZX5:Pinx1; Q9D6K5:Synj2bp; Q9D898:Arpc5l; Q9D8Z2:Triap1; Q9EQ80:Nif3l1; Q9QUM9:Psma6; Q9QYS9:Qki	O35114:Scarb2; P11352:Gpx1; P22892:Ap1g1; P28862:Mmp3; P51943:Ccna2; P60766:Cdc42; P61025:Cks1b; Q3UMR5:Mcu; Q62371:Ddr2; Q64127:Trim24; Q6P069:Sri; Q6PHZ2:Camk2d; Q7TMY8:Huwe1; Q7TSZ8:Nacc1; Q80ZJ1:Rap2a; Q91VR8:Brk1; Q9CWU2:Zdhhc13; Q9CWU6:Uqcc1; Q9D023:Mpc2; Q9D1M4:Eef1e1; Q9ERS2:Ndufa13; Q9JHS3:Lamtor2; Q9QZQ8:H2afy; Q9Z0G0:Gipc1
biological process	regulation of biological process	51.80722892	53.33333333	A2A6Q5:Cdc27; E9PZJ8:Ascc3; E9Q5F9:Setd2; O08582:Gtpbp1; O70591:Pfdn2; O88574:Sap30; P23798:Pcgf2; P49443:Ppm1a; P52432:Polr1c; P84084:Arf5; P84244:H3f3a; P84244:H3f3b; Q61699:Hsph1; Q63844:Mapk3; Q6P9J9:Ano6; Q6P9P6:Kif11; Q6ZWY3:Rps27l; Q80SW1:Ahcyl1; Q80TN4:Dnajc16; Q80Y84:Kdm5b; Q8BGC0:Htatsf1; Q8BH57:Wdr48; Q8BHJ5:Tbl1xr1; Q8BNY6:Ncs1; Q8C052:Map1s; Q8CFE2:Hpf1; Q8K1L5:Ppp1r11; Q8K3A9:Mepce;…	O35114:Scarb2; P11352:Gpx1; P22892:Ap1g1; P27661:H2afx; P28862:Mmp3; P51943:Ccna2; P60766:Cdc42; P61025:Cks1b; P63213:Gng2; P68181:Prkacb; P70351:Ezh1; Q3UMR5:Mcu; Q3USH5:Sfswap; Q3UYH7:Adrbk2; Q61301:Ctnna2; Q62371:Ddr2; Q64127:Trim24; Q6NZQ6:Znf740; Q6P069:Sri; Q6PHZ2:Camk2d; Q7TMY8:Huwe1; Q7TSZ8:Nacc1; Q80WQ6:Rhbdf2; Q80ZJ1:Rap2a; Q8BHG9:Cggbp1; Q8BJU2:Tspan9; Q8BVP5:Csnk1g2; Q8R081:Hnrnpl; Q9…
biological process	reproduction	9.638554217	2.666666667	E9Q5F9:Setd2; P49452:Cenpc; P84244:H3f3a; P84244:H3f3b; Q3UA06:Trip13; Q80Y84:Kdm5b; Q8BH57:Wdr48; Q9QYS9:Qki	P27661:H2afx; P68181:Prkacb
biological process	reproductive process	9.638554217	2.666666667	E9Q5F9:Setd2; P49452:Cenpc; P84244:H3f3a; P84244:H3f3b; Q3UA06:Trip13; Q80Y84:Kdm5b; Q8BH57:Wdr48; Q9QYS9:Qki	P27661:H2afx; P68181:Prkacb
biological process	response to stimulus	31.3253012	41.33333333	E9PZJ8:Ascc3; E9Q5F9:Setd2; E9Q6J5:Bod1l; O35368:Ifi203; P23798:Pcgf2; P27612:Plaa; P49443:Ppm1a; P60898:Polr2i; P62627:Dynlrb1; P84084:Arf5; Q3UA06:Trip13; Q61699:Hsph1; Q63844:Mapk3; Q6P9J9:Ano6; Q6ZWY3:Rps27l; Q80SW1:Ahcyl1; Q80Y84:Kdm5b; Q8BH57:Wdr48; Q8BHJ5:Tbl1xr1; Q8BNY6:Ncs1; Q8CFE2:Hpf1; Q91YU8:Ppan; Q99K30:Eps8l2; Q9CPU4:Mgst3; Q9D6K5:Synj2bp; Q9D8Z2:Triap1	O08997:Atox1; P11352:Gpx1; P21550:Eno3; P22892:Ap1g1; P27661:H2afx; P28862:Mmp3; P51943:Ccna2; P60766:Cdc42; P63213:Gng2; P68181:Prkacb; P70351:Ezh1; Q3UMR5:Mcu; Q3UYH7:Adrbk2; Q61301:Ctnna2; Q62371:Ddr2; Q64127:Trim24; Q6P069:Sri; Q6PHZ2:Camk2d; Q7TMY8:Huwe1; Q80WQ6:Rhbdf2; Q80ZJ1:Rap2a; Q8BJU2:Tspan9; Q8BVP5:Csnk1g2; Q91VR8:Brk1; Q9CWU2:Zdhhc13; Q9CXP8:Gng10; Q9D023:Mpc2; Q9D1M4:Eef1e1; Q9ERS2:…
biological process	rhythmic process	1.204819277	0	Q80Y84:Kdm5b	--
biological process	signaling	16.86746988	33.33333333	P23798:Pcgf2; P49443:Ppm1a; P84084:Arf5; Q61699:Hsph1; Q63844:Mapk3; Q6P9J9:Ano6; Q6ZWY3:Rps27l; Q80SW1:Ahcyl1; Q80Y84:Kdm5b; Q8BHJ5:Tbl1xr1; Q8BNY6:Ncs1; Q99K30:Eps8l2; Q9D6K5:Synj2bp; Q9D8Z2:Triap1	P11352:Gpx1; P28862:Mmp3; P51943:Ccna2; P60766:Cdc42; P63213:Gng2; P68181:Prkacb; Q3UMR5:Mcu; Q3UYH7:Adrbk2; Q62371:Ddr2; Q64127:Trim24; Q6P069:Sri; Q6PHZ2:Camk2d; Q80WQ6:Rhbdf2; Q80ZJ1:Rap2a; Q8BJU2:Tspan9; Q8BVP5:Csnk1g2; Q91VR8:Brk1; Q9CWU2:Zdhhc13; Q9CXP8:Gng10; Q9D023:Mpc2; Q9D1M4:Eef1e1; Q9ERB0:Snap29; Q9ERS2:Ndufa13; Q9JHS3:Lamtor2; Q9Z0G0:Gipc1
biological process	single-organism process	0	0	--	--
cellular component	cell	96.38554217	97.33333333	A2A6Q5:Cdc27; E9PZJ8:Ascc3; E9Q5F9:Setd2; E9Q6J5:Bod1l; O08582:Gtpbp1; O35368:Ifi203; O35972:Mrpl23; O70152:Dpm1; O70591:Pfdn2; O88574:Sap30; P23798:Pcgf2; P27612:Plaa; P40336:Vps26a; P45377:Akr1b8; P49443:Ppm1a; P49452:Cenpc; P52432:Polr1c; P55264:Adk; P60898:Polr2i; P62315:Snrpd1; P62627:Dynlrb1; P84084:Arf5; P84244:H3f3a; P84244:H3f3b; Q3TQI7:; Q3UA06:Trip13; Q3UFM5:Nom1; Q61699:Hsph1; Q63844:…	A2AN08:Ubr4; B7ZMP1:Xpnpep3; E9Q784:Zc3h13; O08997:Atox1; O35114:Scarb2; P11352:Gpx1; P15920:Atp6v0a2; P21550:Eno3; P22892:Ap1g1; P27661:H2afx; P28862:Mmp3; P51863:Atp6v0d1; P51943:Ccna2; P60766:Cdc42; P61025:Cks1b; P62309:Snrpg; P63213:Gng2; P68181:Prkacb; P70193:Lrig1; P70351:Ezh1; Q3U4G3:Xxylt1; Q3UMR5:Mcu; Q3URE1:Acsf3; Q3USH5:Sfswap; Q61301:Ctnna2; Q62371:Ddr2; Q64127:Trim24; Q6NZQ6:Znf740; …
cellular component	cell junction	7.228915663	10.66666667	Q63844:Mapk3; Q8BNY6:Ncs1; Q8C052:Map1s; Q99K01:Pdxdc1; Q99K30:Eps8l2; Q9D898:Arpc5l	O35114:Scarb2; P15920:Atp6v0a2; P60766:Cdc42; Q61301:Ctnna2; Q62371:Ddr2; Q6PHZ2:Camk2d; Q8BJU2:Tspan9; Q9Z0G0:Gipc1
cellular component	cell part	95.18072289	97.33333333	A2A6Q5:Cdc27; E9PZJ8:Ascc3; E9Q5F9:Setd2; E9Q6J5:Bod1l; O08582:Gtpbp1; O35368:Ifi203; O35972:Mrpl23; O70152:Dpm1; O70591:Pfdn2; O88574:Sap30; P23798:Pcgf2; P27612:Plaa; P40336:Vps26a; P45377:Akr1b8; P49443:Ppm1a; P49452:Cenpc; P52432:Polr1c; P55264:Adk; P60898:Polr2i; P62315:Snrpd1; P62627:Dynlrb1; P84084:Arf5; P84244:H3f3a; P84244:H3f3b; Q3TQI7:; Q3UA06:Trip13; Q3UFM5:Nom1; Q61699:Hsph1; Q63844:…	A2AN08:Ubr4; B7ZMP1:Xpnpep3; E9Q784:Zc3h13; O08997:Atox1; O35114:Scarb2; P11352:Gpx1; P15920:Atp6v0a2; P21550:Eno3; P22892:Ap1g1; P27661:H2afx; P28862:Mmp3; P51863:Atp6v0d1; P51943:Ccna2; P60766:Cdc42; P61025:Cks1b; P62309:Snrpg; P63213:Gng2; P68181:Prkacb; P70193:Lrig1; P70351:Ezh1; Q3U4G3:Xxylt1; Q3UMR5:Mcu; Q3URE1:Acsf3; Q3USH5:Sfswap; Q61301:Ctnna2; Q62371:Ddr2; Q64127:Trim24; Q6NZQ6:Znf740; …
cellular component	extracellular matrix	0	0	--	--
cellular component	extracellular matrix part	0	0	--	--
cellular component	extracellular region	24.09638554	36	O70591:Pfdn2; P27612:Plaa; P40336:Vps26a; P45377:Akr1b8; P84084:Arf5; P84244:H3f3a; P84244:H3f3b; Q61699:Hsph1; Q63844:Mapk3; Q6P9J9:Ano6; Q80SW1:Ahcyl1; Q8BFZ3:Actbl2; Q8BNY6:Ncs1; Q8JZU2:Slc25a1; Q99K30:Eps8l2; Q9CPQ8:Atp5mg; Q9CPU4:Mgst3; Q9D898:Arpc5l; Q9EQ06:Hsd17b11; Q9QUM9:Psma6	B7ZMP1:Xpnpep3; O35114:Scarb2; P11352:Gpx1; P21550:Eno3; P27661:H2afx; P28862:Mmp3; P51863:Atp6v0d1; P60766:Cdc42; P63213:Gng2; P68181:Prkacb; Q62371:Ddr2; Q6P069:Sri; Q7M759:Abhd17b; Q7TMY8:Huwe1; Q80ZJ1:Rap2a; Q8R081:Hnrnpl; Q91VR8:Brk1; Q9CR26:Vta1; Q9CXP8:Gng10; Q9CYH2:Prxl2a; Q9D1M4:Eef1e1; Q9D7N9:Apmap; Q9DCS9:Ndufb10; Q9ERS2:Ndufa13; Q9JHS3:Lamtor2; Q9QZQ8:H2afy; Q9Z0G0:Gipc1
cellular component	extracellular region part	22.89156627	34.66666667	O70591:Pfdn2; P27612:Plaa; P40336:Vps26a; P45377:Akr1b8; P84084:Arf5; P84244:H3f3a; P84244:H3f3b; Q61699:Hsph1; Q63844:Mapk3; Q6P9J9:Ano6; Q80SW1:Ahcyl1; Q8BFZ3:Actbl2; Q8BNY6:Ncs1; Q8JZU2:Slc25a1; Q99K30:Eps8l2; Q9CPQ8:Atp5mg; Q9CPU4:Mgst3; Q9D898:Arpc5l; Q9QUM9:Psma6	B7ZMP1:Xpnpep3; O35114:Scarb2; P11352:Gpx1; P21550:Eno3; P27661:H2afx; P28862:Mmp3; P51863:Atp6v0d1; P60766:Cdc42; P63213:Gng2; P68181:Prkacb; Q62371:Ddr2; Q6P069:Sri; Q7TMY8:Huwe1; Q80ZJ1:Rap2a; Q8R081:Hnrnpl; Q91VR8:Brk1; Q9CR26:Vta1; Q9CXP8:Gng10; Q9CYH2:Prxl2a; Q9D1M4:Eef1e1; Q9D7N9:Apmap; Q9DCS9:Ndufb10; Q9ERS2:Ndufa13; Q9JHS3:Lamtor2; Q9QZQ8:H2afy; Q9Z0G0:Gipc1
cellular component	macromolecular complex	44.57831325	41.33333333	A2A6Q5:Cdc27; E9PZJ8:Ascc3; O08582:Gtpbp1; O35972:Mrpl23; O70152:Dpm1; O70591:Pfdn2; O88574:Sap30; P23798:Pcgf2; P40336:Vps26a; P49452:Cenpc; P52432:Polr1c; P60898:Polr2i; P62315:Snrpd1; P62627:Dynlrb1; P84244:H3f3a; P84244:H3f3b; Q6P9J9:Ano6; Q6P9P6:Kif11; Q6ZWY3:Rps27l; Q8BGC0:Htatsf1; Q8BHJ5:Tbl1xr1; Q8C0E2:Vps26b; Q8K1L5:Ppp1r11; Q91WK5:Gcsh; Q91YU8:Ppan; Q922U1:Prpf3; Q923G2:Polr2h; Q9CPQ8:A…	P15920:Atp6v0a2; P21550:Eno3; P22892:Ap1g1; P27661:H2afx; P51863:Atp6v0d1; P51943:Ccna2; P60766:Cdc42; P61025:Cks1b; P62309:Snrpg; P63213:Gng2; P68181:Prkacb; P70351:Ezh1; Q3UMR5:Mcu; Q6PHZ2:Camk2d; Q6ZWQ7:Spcs3; Q8R081:Hnrnpl; Q91VR8:Brk1; Q91VT4:Cbr4; Q91W18:Tdrd3; Q9CPY1:Mrpl51; Q9CQ91:Ndufa3; Q9CQF8:Mrpl57; Q9CXP8:Gng10; Q9CXY9:Pigk; Q9D1M4:Eef1e1; Q9DCS9:Ndufb10; Q9ERB0:Snap29; Q9ERS2:Ndufa1…
cellular component	membrane	36.14457831	56	E9PZJ8:Ascc3; O08582:Gtpbp1; O35368:Ifi203; O70152:Dpm1; P40336:Vps26a; P49443:Ppm1a; P62627:Dynlrb1; P84084:Arf5; Q63844:Mapk3; Q6P9J9:Ano6; Q6P9P6:Kif11; Q80SW1:Ahcyl1; Q80TN4:Dnajc16; Q80V26:Impad1; Q8BNY6:Ncs1; Q8BS95:Gpr89a; Q8C0E2:Vps26b; Q8CHS2:Dnajc22; Q8JZU2:Slc25a1; Q91YP0:L2hgdh; Q99K30:Eps8l2; Q9CPQ8:Atp5mg; Q9CPU4:Mgst3; Q9CQU3:Rer1; Q9CW79:Golga1; Q9D1Q4:Dpm3; Q9D6K5:Synj2bp; Q9JJG9…	A2AN08:Ubr4; O35114:Scarb2; P15920:Atp6v0a2; P21550:Eno3; P22892:Ap1g1; P51863:Atp6v0d1; P60766:Cdc42; P63213:Gng2; P68181:Prkacb; P70193:Lrig1; Q3U4G3:Xxylt1; Q3UMR5:Mcu; Q61301:Ctnna2; Q62371:Ddr2; Q6P069:Sri; Q6PHZ2:Camk2d; Q6ZWQ7:Spcs3; Q7M759:Abhd17b; Q7TMY8:Huwe1; Q80WQ6:Rhbdf2; Q80ZJ1:Rap2a; Q8BGK6:Slc7a6; Q8BHE8:Maip1; Q8BJU2:Tspan9; Q8BVP5:Csnk1g2; Q8C145:Slc39a6; Q8K0D7:Wrb; Q8R081:Hnrn…
cellular component	membrane part	25.30120482	41.33333333	O70152:Dpm1; P40336:Vps26a; Q63844:Mapk3; Q6P9J9:Ano6; Q80SW1:Ahcyl1; Q80TN4:Dnajc16; Q80V26:Impad1; Q8BNY6:Ncs1; Q8BS95:Gpr89a; Q8C0E2:Vps26b; Q8CHS2:Dnajc22; Q8JZU2:Slc25a1; Q91YP0:L2hgdh; Q99K30:Eps8l2; Q9CPQ8:Atp5mg; Q9CPU4:Mgst3; Q9CQU3:Rer1; Q9D1Q4:Dpm3; Q9D6K5:Synj2bp; Q9JJG9:Noa1; Q9QYE6:Golga5	A2AN08:Ubr4; O35114:Scarb2; P15920:Atp6v0a2; P22892:Ap1g1; P51863:Atp6v0d1; P60766:Cdc42; P63213:Gng2; P70193:Lrig1; Q3U4G3:Xxylt1; Q3UMR5:Mcu; Q61301:Ctnna2; Q62371:Ddr2; Q6P069:Sri; Q6PHZ2:Camk2d; Q6ZWQ7:Spcs3; Q80WQ6:Rhbdf2; Q8BGK6:Slc7a6; Q8BJU2:Tspan9; Q8C145:Slc39a6; Q8K0D7:Wrb; Q9CQ91:Ndufa3; Q9CWU2:Zdhhc13; Q9CXP8:Gng10; Q9CXY9:Pigk; Q9D023:Mpc2; Q9D7N9:Apmap; Q9DCS9:Ndufb10; Q9ERB0:Snap2…
cellular component	membrane-enclosed lumen	40.96385542	29.33333333	A2A6Q5:Cdc27; E9Q6J5:Bod1l; O35368:Ifi203; O35972:Mrpl23; O70591:Pfdn2; O88574:Sap30; P23798:Pcgf2; P49452:Cenpc; P52432:Polr1c; P55264:Adk; P60898:Polr2i; P84244:H3f3a; P84244:H3f3b; Q3TQI7:; Q3UFM5:Nom1; Q61699:Hsph1; Q63844:Mapk3; Q8BGC0:Htatsf1; Q8BHJ5:Tbl1xr1; Q8C052:Map1s; Q8CFI5:Pars2; Q8VBU8:Banp; Q91YU8:Ppan; Q922U1:Prpf3; Q923G2:Polr2h; Q99LL5:Pwp1; Q9CZX5:Pinx1; Q9D1B9:Mrpl28; Q9D8Z2:T…	A2AN08:Ubr4; E9Q784:Zc3h13; O35114:Scarb2; P27661:H2afx; P51943:Ccna2; P70351:Ezh1; Q64127:Trim24; Q6P069:Sri; Q7TMY8:Huwe1; Q7TSZ8:Nacc1; Q8BHE8:Maip1; Q8BHG9:Cggbp1; Q8BYM8:Cars2; Q8R081:Hnrnpl; Q91VT4:Cbr4; Q99KR3:Lactb2; Q9CPY1:Mrpl51; Q9CQF8:Mrpl57; Q9CWV0:Malsu1; Q9ERS2:Ndufa13; Q9QZQ8:H2afy; Q9Z1P6:Ndufa7
cellular component	mitochondrion-associated adherens complex	0	0	--	--
cellular component	nucleoid	0	0	--	--
cellular component	organelle	93.97590361	88	A2A6Q5:Cdc27; E9PZJ8:Ascc3; E9Q5F9:Setd2; E9Q6J5:Bod1l; O35368:Ifi203; O35972:Mrpl23; O70152:Dpm1; O70591:Pfdn2; O88574:Sap30; P23798:Pcgf2; P27612:Plaa; P40336:Vps26a; P45377:Akr1b8; P49443:Ppm1a; P49452:Cenpc; P52432:Polr1c; P55264:Adk; P60898:Polr2i; P62315:Snrpd1; P62627:Dynlrb1; P84084:Arf5; P84244:H3f3a; P84244:H3f3b; Q3TQI7:; Q3UA06:Trip13; Q3UFM5:Nom1; Q61699:Hsph1; Q63844:Mapk3; Q6P9J9:A…	A2AN08:Ubr4; B7ZMP1:Xpnpep3; E9Q784:Zc3h13; O35114:Scarb2; P11352:Gpx1; P15920:Atp6v0a2; P21550:Eno3; P22892:Ap1g1; P27661:H2afx; P28862:Mmp3; P51863:Atp6v0d1; P51943:Ccna2; P60766:Cdc42; P62309:Snrpg; P63213:Gng2; P68181:Prkacb; P70351:Ezh1; Q3U4G3:Xxylt1; Q3UMR5:Mcu; Q3URE1:Acsf3; Q3USH5:Sfswap; Q61301:Ctnna2; Q62371:Ddr2; Q64127:Trim24; Q6NZQ6:Znf740; Q6P069:Sri; Q6PHZ2:Camk2d; Q6ZWQ7:Spcs3; Q…
cellular component	organelle part	61.44578313	61.33333333	A2A6Q5:Cdc27; E9Q6J5:Bod1l; O35368:Ifi203; O35972:Mrpl23; O70152:Dpm1; O70591:Pfdn2; O88574:Sap30; P23798:Pcgf2; P40336:Vps26a; P49452:Cenpc; P52432:Polr1c; P55264:Adk; P60898:Polr2i; P62315:Snrpd1; P62627:Dynlrb1; P84244:H3f3a; P84244:H3f3b; Q3TQI7:; Q3UFM5:Nom1; Q61699:Hsph1; Q63844:Mapk3; Q6P9P6:Kif11; Q6ZWY3:Rps27l; Q8BGC0:Htatsf1; Q8BHJ5:Tbl1xr1; Q8BS95:Gpr89a; Q8C052:Map1s; Q8CFI5:Pars2; Q8…	A2AN08:Ubr4; E9Q784:Zc3h13; O35114:Scarb2; P15920:Atp6v0a2; P22892:Ap1g1; P27661:H2afx; P51863:Atp6v0d1; P51943:Ccna2; P60766:Cdc42; P62309:Snrpg; P68181:Prkacb; P70351:Ezh1; Q3U4G3:Xxylt1; Q3UMR5:Mcu; Q64127:Trim24; Q6P069:Sri; Q6PHZ2:Camk2d; Q6ZWQ7:Spcs3; Q7TMY8:Huwe1; Q7TSZ8:Nacc1; Q80WQ6:Rhbdf2; Q80ZJ1:Rap2a; Q8BHE8:Maip1; Q8BHG9:Cggbp1; Q8BYM8:Cars2; Q8K0D7:Wrb; Q8R081:Hnrnpl; Q91VT4:Cbr4; Q…
cellular component	symplast	0	0	--	--
cellular component	synapse	2.409638554	8	Q8BNY6:Ncs1; Q8C052:Map1s	P51863:Atp6v0d1; Q61301:Ctnna2; Q6P069:Sri; Q6PHZ2:Camk2d; Q9ERB0:Snap29; Q9Z0G0:Gipc1
cellular component	synapse part	1.204819277	6.666666667	Q8BNY6:Ncs1	P51863:Atp6v0d1; Q61301:Ctnna2; Q6P069:Sri; Q9ERB0:Snap29; Q9Z0G0:Gipc1
cellular component	virion	0	0	--	--
cellular component	virion part	0	0	--	--
molecular function	D-alanyl carrier activity	0	0	--	--
molecular function	antioxidant activity	1.204819277	2.666666667	Q9CPU4:Mgst3	P11352:Gpx1; Q9CYH2:Prxl2a
molecular function	binding	69.87951807	62.66666667	A2A6Q5:Cdc27; E9PZJ8:Ascc3; E9Q6J5:Bod1l; O08582:Gtpbp1; O35368:Ifi203; O35972:Mrpl23; O70591:Pfdn2; O88574:Sap30; P23798:Pcgf2; P27612:Plaa; P49443:Ppm1a; P49452:Cenpc; P52432:Polr1c; P55264:Adk; P60898:Polr2i; P62315:Snrpd1; P62627:Dynlrb1; P84084:Arf5; P84244:H3f3a; P84244:H3f3b; Q3UA06:Trip13; Q3UFM5:Nom1; Q61699:Hsph1; Q63844:Mapk3; Q6P9J9:Ano6; Q6P9P6:Kif11; Q6ZWY3:Rps27l; Q80SW1:Ahcyl1; Q8…	A2AN08:Ubr4; B7ZMP1:Xpnpep3; E9Q784:Zc3h13; O08997:Atox1; O35114:Scarb2; P11352:Gpx1; P15920:Atp6v0a2; P21550:Eno3; P22892:Ap1g1; P27661:H2afx; P28862:Mmp3; P51943:Ccna2; P60766:Cdc42; P61025:Cks1b; P62309:Snrpg; P63213:Gng2; P68181:Prkacb; Q3U4G3:Xxylt1; Q3UMR5:Mcu; Q3URE1:Acsf3; Q3USH5:Sfswap; Q3UYH7:Adrbk2; Q61301:Ctnna2; Q62371:Ddr2; Q64127:Trim24; Q6NZQ6:Znf740; Q6P069:Sri; Q6PHZ2:Camk2d; Q7…
molecular function	catalytic activity	36.14457831	46.66666667	E9PZJ8:Ascc3; E9Q5F9:Setd2; O08582:Gtpbp1; O70152:Dpm1; O88574:Sap30; P45377:Akr1b8; P49443:Ppm1a; P52432:Polr1c; P55264:Adk; P60898:Polr2i; P62627:Dynlrb1; Q63844:Mapk3; Q6P9P6:Kif11; Q80SW1:Ahcyl1; Q80V26:Impad1; Q80Y84:Kdm5b; Q8BG79:Cwf19l2; Q8CFI5:Pars2; Q8K3A9:Mepce; Q91YP0:L2hgdh; Q923G2:Polr2h; Q99K01:Pdxdc1; Q9CPQ8:Atp5mg; Q9CPU4:Mgst3; Q9D1Q4:Dpm3; Q9EQ06:Hsd17b11; Q9JJF3:Riox1; Q9JJG9:N…	A2AN08:Ubr4; B7ZMP1:Xpnpep3; P11352:Gpx1; P15920:Atp6v0a2; P21550:Eno3; P28862:Mmp3; P51863:Atp6v0d1; P51943:Ccna2; P60766:Cdc42; P63213:Gng2; P68181:Prkacb; P70351:Ezh1; Q3U4G3:Xxylt1; Q3URE1:Acsf3; Q3UYH7:Adrbk2; Q62371:Ddr2; Q64127:Trim24; Q6P069:Sri; Q6PHZ2:Camk2d; Q6ZWQ7:Spcs3; Q7M759:Abhd17b; Q7TMY8:Huwe1; Q80ZJ1:Rap2a; Q8BVP5:Csnk1g2; Q8BYM8:Cars2; Q8K4F5:Abhd11; Q8VHN8:Nudt16l1; Q91VT4:Cb…
molecular function	channel regulator activity	0	1.333333333	--	Q6PHZ2:Camk2d
molecular function	chemoattractant activity	0	0	--	--
molecular function	chemorepellent activity	0	0	--	--
molecular function	electron carrier activity	0	0	--	--
molecular function	enzyme regulator activity	4.819277108	4	P27612:Plaa; Q6ZWY3:Rps27l; Q8K1L5:Ppp1r11; Q9CZX5:Pinx1	P61025:Cks1b; Q9QZQ8:H2afy; Q9Z0G0:Gipc1
molecular function	metallochaperone activity	0	1.333333333	--	O08997:Atox1
molecular function	molecular transducer activity	0	4	--	P51943:Ccna2; P68181:Prkacb; Q62371:Ddr2
molecular function	morphogen activity	0	0	--	--
molecular function	nucleic acid binding transcription factor activity	0	0	--	--
molecular function	nutrient reservoir activity	0	0	--	--
molecular function	protein binding transcription factor activity	0	0	--	--
molecular function	protein tag	0	0	--	--
molecular function	receptor activity	0	0	--	--
molecular function	receptor regulator activity	0	0	--	--
molecular function	structural molecule activity	4.819277108	5.333333333	O35972:Mrpl23; Q6ZWY3:Rps27l; Q9D0G0:Mrps30; Q9D1B9:Mrpl28	Q61301:Ctnna2; Q9CPY1:Mrpl51; Q9CQF8:Mrpl57; Q9Z1P6:Ndufa7
molecular function	translation regulator activity	1.204819277	0	Q6ZWY3:Rps27l	--
molecular function	transporter activity	8.43373494	10.66666667	P40336:Vps26a; Q6P9J9:Ano6; Q8BNY6:Ncs1; Q8BS95:Gpr89a; Q8C0E2:Vps26b; Q9CPQ8:Atp5mg; Q9D8Z2:Triap1	O08997:Atox1; P15920:Atp6v0a2; P22892:Ap1g1; P51863:Atp6v0d1; Q3UMR5:Mcu; Q8BGK6:Slc7a6; Q8C145:Slc39a6; Q9CWU2:Zdhhc13
