# Supplementary material for: Sublethal heat treatment promotes breast cancer metastasis and its molecular mechanism revealed by quantitative proteomic analysis
Source: Aging (Albany NY). 2022 Feb 12;14(3):1389–406. doi: 10.18632/aging.203884 (PMC8876919; doi:10.18632/aging.203884)
Supplement: Supplementary Table 8 [file aging-14-203884-s007.xls]

Supplementary Table 8. All_vs_DEG.KEGG_classification.
Classification_level2	Classification_level1	Type	Gene_number	Percentage	Gene
Aging	Organismal Systems	ALL	5	0.59	P08228:Sod1; P15208:Insr; P25799:Nfkb1; P68181:Prkacb; Q61411:Hras
Aging	Organismal Systems	DEG	1	1.28	P68181:Prkacb
Circulatory system	Organismal Systems	ALL	32	3.77	G5E829:Atp2b1; O55143:Atp2a2; P08752:Gnai2; P0DP28:Calm3; P11881:Itpr1; P12787:Cox5a; P17665:Cox7c; P43024:Cox6a1; P48771:Cox7a2; P56391:Cox6b1; P62137:Ppp1ca; P62141:Ppp1cb; P62715:Ppp2cb; P63085:Mapk1; P63094:Gnas; P68181:Prkacb; P70227:Itpr3; P99028:Uqcrh; Q61210:Arhgef1; Q63844:Mapk3; Q6IRU2:Tpm4; Q6PHZ2:Camk2d; Q76MZ3:Ppp2r1a; Q7TNP2:Ppp2r1b; Q8BG95:Ppp1r12b; Q8VDN2:Atp1a1; Q9CPQ1:Cox6c; Q9C…
Circulatory system	Organismal Systems	DEG	4	5.13	P62141:Ppp1cb; P68181:Prkacb; Q63844:Mapk3; Q6PHZ2:Camk2d
Development and regeneration	Organismal Systems	ALL	23	2.71	B2RXS4:Plxnb2; O08553:Dpysl2; O54890:Itgb3; O55222:Ilk; P08752:Gnai2; P09055:Itgb1; P15066:Jund; P25799:Nfkb1; P34152:Ptk2; P35235:Ptpn11; P47930:Fosl2; P54763:Ephb2; P60766:Cdc42; P63085:Mapk1; P70206:Plxna1; Q03145:Epha2; Q3THE2:Myl12b; Q61411:Hras; Q63844:Mapk3; Q64337:Sqstm1; Q6PHZ2:Camk2d; Q8CIN4:Pak2; Q99M51:Nck1
Development and regeneration	Organismal Systems	DEG	3	3.85	P60766:Cdc42; Q63844:Mapk3; Q6PHZ2:Camk2d
Digestive system	Organismal Systems	ALL	27	3.18	B2RX12:Abcc3; G5E829:Atp2b1; O08528:Hk2; O08997:Atox1; O55143:Atp2a2; P02463:Col4a1; P05202:Got2; P08752:Gnai2; P09528:Fth1; P0DP28:Calm3; P10852:Slc3a2; P11881:Itpr1; P49282:Slc11a2; P62835:Rap1a; P63094:Gnas; P68181:Prkacb; P70227:Itpr3; Q60930:Vdac2; Q61009:Scarb1; Q64430:Atp7a; Q6PHZ2:Camk2d; Q8BLF1:Nceh1; Q8CFE6:Slc38a2; Q8K0B2:Lmbrd1; Q8VDN2:Atp1a1; Q9DAX2:Plpp2; Q9WV55:Vapa
Digestive system	Organismal Systems	DEG	4	5.13	O08997:Atox1; P68181:Prkacb; Q64430:Atp7a; Q6PHZ2:Camk2d
Endocrine system	Organismal Systems	ALL	65	7.66	A2A6Q5:Cdc27; A2ABV5:Med14; G5E829:Atp2b1; O08528:Hk2; O54890:Itgb3; O55143:Atp2a2; O55222:Ilk; P02463:Col4a1; P08003:Pdia4; P08752:Gnai2; P0DP28:Calm3; P11352:Gpx1; P11881:Itpr1; P12382:Pfkl; P13011:Scd2; P15066:Jund; P15208:Insr; P25799:Nfkb1; P30416:Fkbp4; P31324:Prkar2b; P32020:Scp2; P35235:Ptpn11; P45952:Acadm; P51943:Ccna2; P52480:Pkm; P60766:Cdc42; P62137:Ppp1ca; P62141:Ppp1cb; P63085:Mapk…
Endocrine system	Organismal Systems	DEG	10	12.82	A2A6Q5:Cdc27; P11352:Gpx1; P51943:Ccna2; P60766:Cdc42; P62141:Ppp1cb; P63213:Gng2; P68181:Prkacb; Q63844:Mapk3; Q6PHZ2:Camk2d; Q9CXP8:Gng10
Environmental adaptation	Organismal Systems	ALL	70	8.24	A2AIL4:Ndufaf6; A2APY7:Ndufaf5; A2BH40:Arid1a; O54941:Smarce1; P08752:Gnai2; P0DP28:Calm3; P11881:Itpr1; P12787:Cox5a; P17665:Cox7c; P43024:Cox6a1; P48771:Cox7a2; P52503:Ndufs6; P56391:Cox6b1; P56480:Atp5f1b; P62878:Rbx1; P63085:Mapk1; P63094:Gnas; P63213:Gng2; P68181:Prkacb; P70227:Itpr3; P97450:Atp5pf; P99028:Uqcrh; Q03265:Atp5f1a; Q3TKT4:Smarca4; Q59J78:Ndufaf2; Q61411:Hras; Q62425:Ndufa4; Q63…
Environmental adaptation	Organismal Systems	DEG	10	12.82	P63213:Gng2; P68181:Prkacb; Q63844:Mapk3; Q6PHZ2:Camk2d; Q9CPQ8:Atp5mg; Q9CQ91:Ndufa3; Q9CXP8:Gng10; Q9DCS9:Ndufb10; Q9ERS2:Ndufa13; Q9Z1P6:Ndufa7
Excretory system	Organismal Systems	ALL	30	3.53	D3Z7P3:Gls; G5E829:Atp2b1; P14152:Mdh1; P15208:Insr; P15920:Atp6v0a2; P17426:Ap2a1; P26443:Glud1; P46460:Nsf; P50516:Atp6v1a; P50518:Atp6v1e1; P51863:Atp6v0d1; P62814:Atp6v1b2; P63085:Mapk1; P63094:Gnas; P63168:Dynll1; P68181:Prkacb; P70452:Stx4; Q61599:Arhgdib; Q63844:Mapk3; Q68FD5:Cltc; Q8BH04:Pck2; Q8VDN2:Atp1a1; Q99PT1:Arhgdia; Q9CQD1:Rab5a; Q9D0M5:Dynll2; Q9D1K2:Atp6v1f; Q9DBG3:Ap2b1; Q9JHL1…
Excretory system	Organismal Systems	DEG	4	5.13	P15920:Atp6v0a2; P51863:Atp6v0d1; P68181:Prkacb; Q63844:Mapk3
Immune system	Organismal Systems	ALL	68	8.01	O54890:Itgb3; O88792:F11r; P01027:C3; P08752:Gnai2; P09055:Itgb1; P0DP28:Calm3; P10639:Txn; P11881:Itpr1; P15066:Jund; P25799:Nfkb1; P26039:Tln1; P26041:Msn; P27773:Pdia3; P28667:Marcksl1; P28862:Mmp3; P34152:Ptk2; P35235:Ptpn11; P40240:Cd9; P52432:Polr1c; P60521:Gabarapl2; P60766:Cdc42; P62071:Rras2; P62137:Ppp1ca; P62141:Ppp1cb; P62835:Rap1a; P63085:Mapk1; P63094:Gnas; P63213:Gng2; P68181:Prkac…
Immune system	Organismal Systems	DEG	13	16.67	P28862:Mmp3; P52432:Polr1c; P60766:Cdc42; P62141:Ppp1cb; P63213:Gng2; P68181:Prkacb; Q3UMR5:Mcu; Q3UYH7:Adrbk2; Q61301:Ctnna2; Q63844:Mapk3; Q923G2:Polr2h; Q9CXP8:Gng10; Q9D898:Arpc5l
Nervous system	Organismal Systems	ALL	66	7.77	D3Z7P3:Gls; O08599:Stxbp1; O88587:Comt; P08752:Gnai2; P0DP28:Calm3; P11881:Itpr1; P15920:Atp6v0a2; P17426:Ap2a1; P25799:Nfkb1; P35235:Ptpn11; P46460:Nsf; P50516:Atp6v1a; P50518:Atp6v1e1; P51863:Atp6v0d1; P52503:Ndufs6; P60521:Gabarapl2; P60766:Cdc42; P62137:Ppp1ca; P62141:Ppp1cb; P62715:Ppp2cb; P62814:Atp6v1b2; P62835:Rap1a; P63085:Mapk1; P63094:Gnas; P63213:Gng2; P68181:Prkacb; P70227:Itpr3; P70…
Nervous system	Organismal Systems	DEG	14	17.95	P15920:Atp6v0a2; P51863:Atp6v0d1; P60766:Cdc42; P62141:Ppp1cb; P63213:Gng2; P68181:Prkacb; Q3UYH7:Adrbk2; Q63844:Mapk3; Q6PHZ2:Camk2d; Q9CQ91:Ndufa3; Q9CXP8:Gng10; Q9DCS9:Ndufb10; Q9ERS2:Ndufa13; Q9Z1P6:Ndufa7
Sensory system	Organismal Systems	ALL	9	1.06	P0DP28:Calm3; P11881:Itpr1; P62137:Ppp1ca; P62141:Ppp1cb; P63094:Gnas; P68181:Prkacb; P70227:Itpr3; Q3UYH7:Adrbk2; Q6PHZ2:Camk2d
Sensory system	Organismal Systems	DEG	4	5.13	P62141:Ppp1cb; P68181:Prkacb; Q3UYH7:Adrbk2; Q6PHZ2:Camk2d
Amino acid metabolism	Metabolism	ALL	51	6.01	B2RQC6:Cad; D3Z7P3:Gls; E9Q5F9:Setd2; O08749:Dld; O88508:Dnmt3a; O88587:Comt; O88986:Gcat; P05201:Got1; P05202:Got2; P08249:Mdh2; P13864:Dnmt1; P14152:Mdh1; P26443:Glud1; P45952:Acadm; P47856:Gfpt1; P55200:Kmt2a; P70351:Ezh1; Q07417:Acads; Q3URE1:Acsf3; Q60715:P4ha1; Q60759:Gcdh; Q61024:Asns; Q61425:Hadh; Q61753:Phgdh; Q6P3A8:Bckdhb; Q80SW1:Ahcyl1; Q8BGT5:Gpt2; Q8BH95:Echs1; Q8BMS1:Hadha; Q8BVE8:…
Amino acid metabolism	Metabolism	DEG	5	6.41	E9Q5F9:Setd2; P70351:Ezh1; Q3URE1:Acsf3; Q80SW1:Ahcyl1; Q91WK5:Gcsh
Biosynthesis of other secondary metabolites	Metabolism	ALL	1	0.12	O08528:Hk2
Carbohydrate metabolism	Metabolism	ALL	61	7.18	O08528:Hk2; O08749:Dld; P06745:Gpi; P08249:Mdh2; P09411:Pgk1; P12382:Pfkl; P14152:Mdh1; P17751:Tpi1; P21550:Eno3; P28271:Aco1; P40142:Tkt; P45377:Akr1b8; P47856:Gfpt1; P52480:Pkm; P54071:Idh2; P70699:Gaa; P97807:Fh; Q07417:Acads; Q2TBE6:Pi4k2a; Q3TW96:Uap1l1; Q5SWU9:Acaca; Q60597:Ogdh; Q61425:Hadh; Q6P3A8:Bckdhb; Q7TNG8:Ldhd; Q80V26:Impad1; Q8BH04:Pck2; Q8BH95:Echs1; Q8BKZ9:Pdhx; Q8BMF4:Dlat; Q8B…
Carbohydrate metabolism	Metabolism	DEG	5	6.41	P21550:Eno3; P45377:Akr1b8; Q80V26:Impad1; Q91WK5:Gcsh; Q91YP0:L2hgdh
Energy metabolism	Metabolism	ALL	53	6.24	P12787:Cox5a; P15920:Atp6v0a2; P17665:Cox7c; P26443:Glud1; P43024:Cox6a1; P48771:Cox7a2; P50516:Atp6v1a; P50518:Atp6v1e1; P51863:Atp6v0d1; P52503:Ndufs6; P56391:Cox6b1; P56480:Atp5f1b; P62814:Atp6v1b2; P97450:Atp5pf; P99028:Uqcrh; Q03265:Atp5f1a; Q62425:Ndufa4; Q7TMF3:Ndufa12; Q80V26:Impad1; Q8BJ03:Cox15; Q8K2B3:Sdha; Q91VD9:Ndufs1; Q91VM9:Ppa2; Q91WD5:Ndufs2; Q99J99:Mpst; Q99LC3:Ndufa10; Q99LY9:…
Energy metabolism	Metabolism	DEG	8	10.26	P15920:Atp6v0a2; P51863:Atp6v0d1; Q80V26:Impad1; Q9CPQ8:Atp5mg; Q9CQ91:Ndufa3; Q9DCS9:Ndufb10; Q9ERS2:Ndufa13; Q9Z1P6:Ndufa7
Glycan biosynthesis and metabolism	Metabolism	ALL	24	2.83	O08912:Galnt1; O70152:Dpm1; P27046:Man2a1; P39098:Man1a2; P61804:Dad1; P70419:Galnt3; Q6P8H8:Alg8; Q80VA0:Galnt7; Q8BHN3:Ganab; Q8BWP8:B4gat1; Q8BYB9:Poglut1; Q8CGY8:Ogt; Q8K297:Colgalt1; Q8R3H7:Hs2st1; Q8VDI9:Alg9; Q91ZW2:Pofut1; Q99J27:Slc33a1; Q9CXY9:Pigk; Q9D1Q4:Dpm3; Q9DB25:Alg5; Q9DBE8:Alg2; Q9JMK0:B4galt5; Q9R0E1:Plod3; Q9WTK3:Gpaa1
Glycan biosynthesis and metabolism	Metabolism	DEG	3	3.85	O70152:Dpm1; Q9CXY9:Pigk; Q9D1Q4:Dpm3
Lipid metabolism	Metabolism	ALL	55	6.48	O09005:Degs1; O70572:Smpd2; O88587:Comt; P11352:Gpx1; P13011:Scd2; P32020:Scp2; P42125:Eci1; P45377:Akr1b8; P45952:Acadm; P50428:Arsa; P50544:Acadvl; P70245:Ebp; Q05769:Ptgs2; Q07417:Acads; Q3TFD2:Lpcat1; Q3URE1:Acsf3; Q5SWU9:Acaca; Q60759:Gcdh; Q61425:Hadh; Q61586:Gpam; Q64521:Gpd2; Q6NVG1:Lpcat4; Q6ZPR5:Smpd4; Q8BH95:Echs1; Q8BLN5:Lss; Q8BMS1:Hadha; Q8BWM0:Ptges2; Q8BWT1:Acaa2; Q8C0I1:Agps; Q8C…
Lipid metabolism	Metabolism	DEG	4	5.13	P11352:Gpx1; P45377:Akr1b8; Q3URE1:Acsf3; Q91VT4:Cbr4
Metabolism of cofactors and vitamins	Metabolism	ALL	16	1.88	P36552:Cpox; P45377:Akr1b8; P48760:Fpgs; P53702:Hccs; Q3V3R1:Mthfd1l; Q64737:Gart; Q6TEK5:Vkorc1l1; Q8BJ03:Cox15; Q8C5H8:Nadk2; Q8R1S0:Coq6; Q9CWJ9:Atic; Q9CZN7:Shmt2; Q9D020:Nt5c3a; Q9DBL7:Coasy; Q9JM14:Nt5c; Q9WTP6:Ak2
Metabolism of cofactors and vitamins	Metabolism	DEG	1	1.28	P45377:Akr1b8
Metabolism of other amino acids	Metabolism	ALL	23	2.71	D3Z7P3:Gls; O09131:Gsto1; P07742:Rrm1; P11352:Gpx1; P15626:Gstm2; P19157:Gstp1; P26443:Glud1; P54071:Idh2; Q07417:Acads; Q68FL6:Mars; Q6PDY2:Ado; Q8BH69:Sephs1; Q8BH86:Dglucy; Q8BH95:Echs1; Q8BMS1:Hadha; Q8QZS1:Hibch; Q9CPU4:Mgst3; Q9CPY7:Lap3; Q9CQU0:Txndc12; Q9D7B7:Gpx8; Q9DBF1:Aldh7a1; Q9JMH6:Txnrd1; Q9R0H0:Acox1
Metabolism of other amino acids	Metabolism	DEG	2	2.56	P11352:Gpx1; Q9CPU4:Mgst3
Metabolism of terpenoids and polyketides	Metabolism	ALL	4	0.47	P58044:Idi1; Q33DR2:Pdss1; Q33DR3:Pdss2; Q8QZT1:Acat1
Nucleotide metabolism	Metabolism	ALL	20	2.36	B2RQC6:Cad; O35435:Dhodh; P04184:Tk1; P07742:Rrm1; P08030:Aprt; P52480:Pkm; P55264:Adk; P70698:Ctps1; Q5SUR0:Pfas; Q64737:Gart; Q8BTJ4:Enpp4; Q9CWJ9:Atic; Q9D020:Nt5c3a; Q9DBP5:Cmpk1; Q9DCL9:Paics; Q9JKX6:Nudt5; Q9JM14:Nt5c; Q9WTP6:Ak2; Q9WTP7:Ak3; Q9WV84:Nme4
Nucleotide metabolism	Metabolism	DEG	1	1.28	P55264:Adk
Xenobiotics biodegradation and metabolism	Metabolism	ALL	9	1.06	O09131:Gsto1; P04184:Tk1; P07742:Rrm1; P15626:Gstm2; P19157:Gstp1; Q8CG76:Akr7a2; Q9CPU4:Mgst3; Q9DBP5:Cmpk1; Q9WV84:Nme4
Xenobiotics biodegradation and metabolism	Metabolism	DEG	1	1.28	Q9CPU4:Mgst3
Cancer: overview	Human Diseases	ALL	89	10.48	A2AN08:Ubr4; D3Z7P3:Gls; E9Q5G3:Kif23; O08528:Hk2; O09131:Gsto1; O54890:Itgb3; O88508:Dnmt3a; O88712:Ctbp1; P01027:C3; P02463:Col4a1; P08752:Gnai2; P09055:Itgb1; P0DP28:Calm3; P11881:Itpr1; P12382:Pfkl; P13864:Dnmt1; P15626:Gstm2; P19157:Gstp1; P25799:Nfkb1; P26041:Msn; P26043:Rdx; P28862:Mmp3; P34022:Ranbp1; P34152:Ptk2; P35235:Ptpn11; P51863:Atp6v0d1; P51943:Ccna2; P52480:Pkm; P52927:Hmga2; P55…
Cancer: overview	Human Diseases	DEG	17	21.79	A2AN08:Ubr4; P28862:Mmp3; P51863:Atp6v0d1; P51943:Ccna2; P60766:Cdc42; P61025:Cks1b; P62141:Ppp1cb; P63213:Gng2; P68181:Prkacb; P84244:H3f3a; P84244:H3f3b; Q61301:Ctnna2; Q63844:Mapk3; Q6PHZ2:Camk2d; Q8VHN8:Nudt16l1; Q9CPU4:Mgst3; Q9CXP8:Gng10
Cancer: specific types	Human Diseases	ALL	40	4.71	A2BH40:Arid1a; E9Q7E2:Arid2; O09131:Gsto1; O54941:Smarce1; O55222:Ilk; O88665:Brd7; O88712:Ctbp1; P02463:Col4a1; P09055:Itgb1; P0DP28:Calm3; P15626:Gstm2; P19157:Gstp1; P25799:Nfkb1; P28862:Mmp3; P34152:Ptk2; P35235:Ptpn11; P60766:Cdc42; P61025:Cks1b; P62835:Rap1a; P62869:Elob; P62878:Rbx1; P63085:Mapk1; P70677:Casp3; P97807:Fh; Q02257:Jup; Q05769:Ptgs2; Q3TKT4:Smarca4; Q61001:Lama5; Q61301:Ctnna…
Cancer: specific types	Human Diseases	DEG	7	8.97	P28862:Mmp3; P60766:Cdc42; P61025:Cks1b; Q61301:Ctnna2; Q63844:Mapk3; Q6PHZ2:Camk2d; Q9CPU4:Mgst3
Cardiovascular disease	Human Diseases	ALL	27	3.18	A2A863:Itgb4; E9Q557:Dsp; O09131:Gsto1; O54890:Itgb3; O55143:Atp2a2; P09055:Itgb1; P0DP28:Calm3; P10639:Txn; P15626:Gstm2; P19157:Gstp1; P23242:Gja1; P25799:Nfkb1; P34152:Ptk2; P48678:Lmna; P63094:Gnas; P63166:Sumo1; P68181:Prkacb; P70677:Casp3; P97792:Cxadr; Q02257:Jup; Q61301:Ctnna2; Q62469:Itga2; Q62470:Itga3; Q64337:Sqstm1; Q6IRU2:Tpm4; Q9CPU4:Mgst3; Q9WVC3:Cav2
Cardiovascular disease	Human Diseases	DEG	3	3.85	P68181:Prkacb; Q61301:Ctnna2; Q9CPU4:Mgst3
Drug resistance: antineoplastic	Human Diseases	ALL	21	2.47	B2RX12:Abcc3; O09131:Gsto1; P15626:Gstm2; P19157:Gstp1; P25799:Nfkb1; P34152:Ptk2; P48760:Fpgs; P63085:Mapk1; P63094:Gnas; P68181:Prkacb; P70677:Casp3; Q01320:Top2a; Q61411:Hras; Q63844:Mapk3; Q64430:Atp7a; Q64511:Top2b; Q64737:Gart; Q9CPU4:Mgst3; Q9CWJ9:Atic; Q9CZN7:Shmt2; Q9WVG6:Carm1
Drug resistance: antineoplastic	Human Diseases	DEG	4	5.13	P68181:Prkacb; Q63844:Mapk3; Q64430:Atp7a; Q9CPU4:Mgst3
Endocrine and metabolic disease	Human Diseases	ALL	66	7.77	O08528:Hk2; O08915:Aip; P02463:Col4a1; P08752:Gnai2; P11881:Itpr1; P12787:Cox5a; P15208:Insr; P17665:Cox7c; P25799:Nfkb1; P35235:Ptpn11; P43024:Cox6a1; P47856:Gfpt1; P48771:Cox7a2; P52480:Pkm; P52503:Ndufs6; P55200:Kmt2a; P56391:Cox6b1; P60766:Cdc42; P61965:Wdr5; P62137:Ppp1ca; P62141:Ppp1cb; P62835:Rap1a; P63038:Hspd1; P63085:Mapk1; P63094:Gnas; P68181:Prkacb; P70227:Itpr3; P70677:Casp3; P97807:…
Endocrine and metabolic disease	Human Diseases	DEG	9	11.54	P60766:Cdc42; P62141:Ppp1cb; P68181:Prkacb; Q63844:Mapk3; Q6PHZ2:Camk2d; Q9CQ91:Ndufa3; Q9DCS9:Ndufb10; Q9ERS2:Ndufa13; Q9Z1P6:Ndufa7
Immune disease	Human Diseases	ALL	16	1.88	P01027:C3; P15920:Atp6v0a2; P25799:Nfkb1; P27048:Snrpb; P27661:H2afx; P28862:Mmp3; P50516:Atp6v1a; P50518:Atp6v1e1; P51863:Atp6v0d1; P62315:Snrpd1; P62814:Atp6v1b2; P84244:H3f3a; P84244:H3f3b; Q7TPR4:Actn1; Q9D1K2:Atp6v1f; Q9QZQ8:H2afy
Immune disease	Human Diseases	DEG	8	10.26	P15920:Atp6v0a2; P27661:H2afx; P28862:Mmp3; P51863:Atp6v0d1; P62315:Snrpd1; P84244:H3f3a; P84244:H3f3b; Q9QZQ8:H2afy
Infectious disease: bacterial	Human Diseases	ALL	37	4.36	O08547:Sec22b; O55222:Ilk; P01027:C3; P08752:Gnai2; P09055:Itgb1; P0DP28:Calm3; P15920:Atp6v0a2; P22518:Clk1; P25799:Nfkb1; P34152:Ptk2; P38647:Hspa9; P42208:Septin2; P51863:Atp6v0d1; P60766:Cdc42; P63038:Hspd1; P63085:Mapk1; P70677:Casp3; Q01853:Vcp; Q60598:Cttn; Q61210:Arhgef1; Q61301:Ctnna2; Q63844:Mapk3; Q64727:Vcl; Q68FD5:Cltc; Q6PHZ2:Camk2d; Q6Y5D8:Arhgap10; Q80X90:Flnb; Q8BKX1:Baiap2; Q8BL…
Infectious disease: bacterial	Human Diseases	DEG	7	8.97	P15920:Atp6v0a2; P51863:Atp6v0d1; P60766:Cdc42; Q61301:Ctnna2; Q63844:Mapk3; Q6PHZ2:Camk2d; Q9D898:Arpc5l
Infectious disease: parasitic	Human Diseases	ALL	21	2.47	P01027:C3; P02463:Col4a1; P08752:Gnai2; P09055:Itgb1; P25799:Nfkb1; P28667:Marcksl1; P34152:Ptk2; P62715:Ppp2cb; P63085:Mapk1; P63094:Gnas; P68181:Prkacb; P70677:Casp3; Q05769:Ptgs2; Q61001:Lama5; Q63844:Mapk3; Q64727:Vcl; Q76MZ3:Ppp2r1a; Q7TNP2:Ppp2r1b; Q7TPR4:Actn1; Q99KR7:Ppif; Q9CQD1:Rab5a
Infectious disease: parasitic	Human Diseases	DEG	2	2.56	P68181:Prkacb; Q63844:Mapk3
Infectious disease: viral	Human Diseases	ALL	97	11.43	A2A6Q5:Cdc27; A2A863:Itgb4; A2AN08:Ubr4; O08583:Alyref; O35226:Psmd4; O35326:Srsf5; O35593:Psmd14; O54890:Itgb3; O88574:Sap30; P01027:C3; P02463:Col4a1; P08752:Gnai2; P09055:Itgb1; P0DP28:Calm3; P11881:Itpr1; P14685:Psmd3; P15920:Atp6v0a2; P22892:Ap1g1; P25799:Nfkb1; P26039:Tln1; P26041:Msn; P27773:Pdia3; P34022:Ranbp1; P34152:Ptk2; P35235:Ptpn11; P46471:Psmc2; P48962:Slc25a4; P50516:Atp6v1a; P50…
Infectious disease: viral	Human Diseases	DEG	13	16.67	A2A6Q5:Cdc27; A2AN08:Ubr4; O88574:Sap30; P15920:Atp6v0a2; P22892:Ap1g1; P51863:Atp6v0d1; P51943:Ccna2; P60766:Cdc42; P62141:Ppp1cb; P63213:Gng2; P68181:Prkacb; Q63844:Mapk3; Q9CXP8:Gng10
Neurodegenerative disease	Human Diseases	ALL	72	8.48	O08529:Capn2; O35598:Adam10; O55143:Atp2a2; P08228:Sod1; P08752:Gnai2; P0DP28:Calm3; P11352:Gpx1; P11881:Itpr1; P12787:Cox5a; P17426:Ap2a1; P17665:Cox7c; P21981:Tgm2; P43024:Cox6a1; P48771:Cox7a2; P48962:Slc25a4; P52503:Ndufs6; P56391:Cox6b1; P56480:Atp5f1b; P60898:Polr2i; P62488:Polr2g; P63085:Mapk1; P68181:Prkacb; P70227:Itpr3; P70677:Casp3; P97450:Atp5pf; P97760:Polr2c; P99028:Uqcrh; Q03265:At…
Neurodegenerative disease	Human Diseases	DEG	9	11.54	P11352:Gpx1; P60898:Polr2i; P68181:Prkacb; Q63844:Mapk3; Q923G2:Polr2h; Q9CQ91:Ndufa3; Q9DCS9:Ndufb10; Q9ERS2:Ndufa13; Q9Z1P6:Ndufa7
Substance dependence	Human Diseases	ALL	19	2.24	P08752:Gnai2; P0DP28:Calm3; P25799:Nfkb1; P27661:H2afx; P62137:Ppp1ca; P62141:Ppp1cb; P63085:Mapk1; P63094:Gnas; P63213:Gng2; P68181:Prkacb; P84244:H3f3a; P84244:H3f3b; Q3UYH7:Adrbk2; Q61411:Hras; Q63844:Mapk3; Q6PHZ2:Camk2d; Q8BY71:Hat1; Q9CXP8:Gng10; Q9QZQ8:H2afy
Substance dependence	Human Diseases	DEG	11	14.1	P27661:H2afx; P62141:Ppp1cb; P63213:Gng2; P68181:Prkacb; P84244:H3f3a; P84244:H3f3b; Q3UYH7:Adrbk2; Q63844:Mapk3; Q6PHZ2:Camk2d; Q9CXP8:Gng10; Q9QZQ8:H2afy
Folding, sorting and degradation	Genetic Information Processing	ALL	106	12.49	A2A6Q5:Cdc27; A2BDX3:Mocs3; G5E870:Trip12; O08529:Capn2; O08547:Sec22b; O35226:Psmd4; O35593:Psmd14; O55234:Psmb5; O88630:Gosr1; O88983:Stx8; P08003:Pdia4; P12382:Pfkl; P14576:Srp54; P14685:Psmd3; P16254:Srp14; P21550:Eno3; P27612:Plaa; P27773:Pdia3; P38647:Hspa9; P39098:Man1a2; P46471:Psmc2; P47758:Srprb; P48722:Hspa4l; P49722:Psma2; P54775:Psmc4; P54823:Ddx6; P57759:Erp29; P60904:Dnajc5; P61804…
Folding, sorting and degradation	Genetic Information Processing	DEG	9	11.54	A2A6Q5:Cdc27; P21550:Eno3; P27612:Plaa; Q61699:Hsph1; Q6ZWQ7:Spcs3; Q7TMY8:Huwe1; Q9ERB0:Snap29; Q9QUM9:Psma6; Q9Z1F9:Uba2
Replication and repair	Genetic Information Processing	ALL	13	1.53	O88554:Parp2; P27641:Xrcc5; P37913:Lig1; P49718:Mcm5; P62878:Rbx1; P97310:Mcm2; Q3TCH7:Cul4a; Q3U1J4:Ddb1; Q8BH57:Wdr48; Q8K409:Polb; Q8VEE4:Rpa1; Q99J62:Rfc4; Q9CQ71:Rpa3
Replication and repair	Genetic Information Processing	DEG	1	1.28	Q8BH57:Wdr48
Transcription	Genetic Information Processing	ALL	76	8.95	B1AZI6:Thoc2; B2RY56:Rbm25; O08583:Alyref; O35326:Srsf5; P27048:Snrpb; P52432:Polr1c; P57784:Snrpa1; P59708:Sf3b6; P60335:Pcbp1; P60898:Polr2i; P61327:Magoh; P62305:Snrpe; P62309:Snrpg; P62311:Lsm3; P62315:Snrpd1; P62488:Polr2g; P62996:Tra2b; P63154:Crnkl1; P83870:Phf5a; P83877:Txnl4a; P97760:Polr2c; Q3THK3:Gtf2f1; Q3TIX9:Usp39; Q3TWW8:Srsf6; Q3UEB3:Puf60; Q3UYV9:Ncbp1; Q569Z5:Ddx46; Q62093:Srsf2…
Transcription	Genetic Information Processing	DEG	6	7.69	P52432:Polr1c; P60898:Polr2i; P62309:Snrpg; P62315:Snrpd1; Q922U1:Prpf3; Q923G2:Polr2h
Translation	Genetic Information Processing	ALL	161	18.96	B1AZI6:Thoc2; O08583:Alyref; O08784:Tcof1; O35218:Cpsf2; O35680:Mrps12; O35691:Pnn; O35972:Mrpl23; O70194:Eif3d; O88796:Rpp30; P14115:Rpl27a; P23116:Eif3a; P47963:Rpl13; P58742:Aaas; P61327:Magoh; P62137:Ppp1ca; P62141:Ppp1cb; P62274:Rps29; P62715:Ppp2cb; P62717:Rpl18a; P62830:Rpl23; P62843:Rps15; P62911:Rpl32; P62918:Rpl8; P63166:Sumo1; P63280:Ube2i; P99027:Rplp2; Q05D44:Eif5b; Q14CH7:Aars2; Q3T…
Translation	Genetic Information Processing	DEG	6	7.69	O35972:Mrpl23; P62141:Ppp1cb; Q6ZWY3:Rps27l; Q8BYM8:Cars2; Q8CFI5:Pars2; Q9D1B9:Mrpl28
Membrane transport	Environmental Information Processing	ALL	3	0.35	B2RX12:Abcc3; Q61102:Abcb7; Q9JI39:Abcb10
Signal transduction	Environmental Information Processing	ALL	115	13.55	A2A863:Itgb4; G3X9J0:Sipa1l3; G5E829:Atp2b1; O08528:Hk2; O09005:Degs1; O54890:Itgb3; O55143:Atp2a2; O70572:Smpd2; O88712:Ctbp1; P02463:Col4a1; P08752:Gnai2; P09055:Itgb1; P09411:Pgk1; P0DP28:Calm3; P10852:Slc3a2; P11881:Itpr1; P12382:Pfkl; P13011:Scd2; P15066:Jund; P15208:Insr; P21550:Eno3; P25799:Nfkb1; P26039:Tln1; P28862:Mmp3; P34152:Ptk2; P35235:Ptpn11; P46938:Yap1; P48962:Slc25a4; P49443:Ppm…
Signal transduction	Environmental Information Processing	DEG	18	23.08	P21550:Eno3; P28862:Mmp3; P49443:Ppm1a; P51943:Ccna2; P60766:Cdc42; P62141:Ppp1cb; P63213:Gng2; P68181:Prkacb; Q3UMR5:Mcu; Q3UYH7:Adrbk2; Q61301:Ctnna2; Q63844:Mapk3; Q6PHZ2:Camk2d; Q80V26:Impad1; Q8BHJ5:Tbl1xr1; Q8BVP5:Csnk1g2; Q9CXP8:Gng10; Q9JHS3:Lamtor2
Signaling molecules and interaction	Environmental Information Processing	ALL	13	1.53	A2A863:Itgb4; O54890:Itgb3; O88792:F11r; P01027:C3; P02463:Col4a1; P09055:Itgb1; P32507:Nectin2; Q05793:Hspg2; Q3TEW6:Mpzl1; Q61001:Lama5; Q62469:Itga2; Q62470:Itga3; Q9QZM4:Tnfrsf10b
Cell growth and death	Cellular Processes	ALL	58	6.83	A2A6Q5:Cdc27; O08529:Capn2; O35638:Stag2; O88554:Parp2; P05213:Tuba1b; P09528:Fth1; P0DP28:Calm3; P10852:Slc3a2; P11881:Itpr1; P14733:Lmnb1; P21619:Lmnb2; P25799:Nfkb1; P26443:Glud1; P27661:H2afx; P48678:Lmna; P48962:Slc25a4; P49282:Slc11a2; P49718:Mcm5; P51943:Ccna2; P54731:Faf1; P60335:Pcbp1; P62071:Rras2; P62137:Ppp1ca; P62141:Ppp1cb; P62715:Ppp2cb; P62878:Rbx1; P63085:Mapk1; P63101:Ywhaz; P68…
Cell growth and death	Cellular Processes	DEG	9	11.54	A2A6Q5:Cdc27; P27661:H2afx; P51943:Ccna2; P62141:Ppp1cb; P68181:Prkacb; Q3UMR5:Mcu; Q63844:Mapk3; Q6PHZ2:Camk2d; Q9QZQ8:H2afy
Cell motility	Cellular Processes	ALL	32	3.77	A2A863:Itgb4; O54890:Itgb3; P09055:Itgb1; P26041:Msn; P26043:Rdx; P28660:Nckap1; P34152:Ptk2; P60766:Cdc42; P62071:Rras2; P62137:Ppp1ca; P62141:Ppp1cb; P63085:Mapk1; Q3THE2:Myl12b; Q61210:Arhgef1; Q61411:Hras; Q61879:Myh10; Q62469:Itga2; Q62470:Itga3; Q63844:Mapk3; Q64727:Vcl; Q7TMB8:Cyfip1; Q7TPR4:Actn1; Q8BG95:Ppp1r12b; Q8BKX1:Baiap2; Q8CIN4:Pak2; Q8VDD5:Myh9; Q91VR8:Brk1; Q9CVB6:Arpc2; Q9D898:…
Cell motility	Cellular Processes	DEG	5	6.41	P60766:Cdc42; P62141:Ppp1cb; Q63844:Mapk3; Q91VR8:Brk1; Q9D898:Arpc5l
Cellular community - eukaryotes	Cellular Processes	ALL	61	7.18	A2A863:Itgb4; O08529:Capn2; O54890:Itgb3; O55222:Ilk; O88792:F11r; P02463:Col4a1; P05213:Tuba1b; P08752:Gnai2; P09055:Itgb1; P11881:Itpr1; P15208:Insr; P23242:Gja1; P23798:Pcgf2; P26039:Tln1; P26041:Msn; P26043:Rdx; P32507:Nectin2; P34152:Ptk2; P60766:Cdc42; P62137:Ppp1ca; P62141:Ppp1cb; P62715:Ppp2cb; P62835:Rap1a; P63085:Mapk1; P63094:Gnas; P68181:Prkacb; P68368:Tuba4a; P68372:Tubb4b; P70227:It…
Cellular community - eukaryotes	Cellular Processes	DEG	6	7.69	P23798:Pcgf2; P60766:Cdc42; P62141:Ppp1cb; P68181:Prkacb; Q61301:Ctnna2; Q63844:Mapk3
Transport and catabolism	Cellular Processes	ALL	90	10.6	O08547:Sec22b; O35114:Scarb2; O35459:Ech1; O54890:Itgb3; O70579:Slc25a17; P01027:C3; P05213:Tuba1b; P08228:Sod1; P09055:Itgb1; P11881:Itpr1; P15920:Atp6v0a2; P17426:Ap2a1; P22892:Ap1g1; P32020:Scp2; P35700:Prdx1; P40336:Vps26a; P49282:Slc11a2; P50428:Arsa; P50516:Atp6v1a; P50518:Atp6v1e1; P51863:Atp6v0d1; P54071:Idh2; P60521:Gabarapl2; P60766:Cdc42; P61967:Ap1s1; P62071:Rras2; P62715:Ppp2cb; P628…
Transport and catabolism	Cellular Processes	DEG	14	17.95	O35114:Scarb2; P15920:Atp6v0a2; P22892:Ap1g1; P40336:Vps26a; P51863:Atp6v0d1; P60766:Cdc42; P68181:Prkacb; P84084:Arf5; Q3UYH7:Adrbk2; Q63844:Mapk3; Q8C0E2:Vps26b; Q9CR26:Vta1; Q9D898:Arpc5l; Q9ERB0:Snap29
