# Supplementary material for: Sublethal heat treatment promotes breast cancer metastasis and its molecular mechanism revealed by quantitative proteomic analysis
Source: Aging (Albany NY). 2022 Feb 12;14(3):1389–406. doi: 10.18632/aging.203884 (PMC8876919; doi:10.18632/aging.203884)
Supplement: Supplementary Table 9 [file aging-14-203884-s008.xls]

Supplementary Table 9. Up_vs_down.KEGG_classification.
Classification_level2	Classification_level1	Type	Gene_number	Percentage	Gene
Aging	Organismal Systems	Down	1	2.44	P68181:Prkacb
Circulatory system	Organismal Systems	Up	1	2.7	Q63844:Mapk3
Circulatory system	Organismal Systems	Down	3	7.32	P62141:Ppp1cb; P68181:Prkacb; Q6PHZ2:Camk2d
Development and regeneration	Organismal Systems	Up	1	2.7	Q63844:Mapk3
Development and regeneration	Organismal Systems	Down	2	4.88	P60766:Cdc42; Q6PHZ2:Camk2d
Digestive system	Organismal Systems	Down	4	9.76	O08997:Atox1; P68181:Prkacb; Q64430:Atp7a; Q6PHZ2:Camk2d
Endocrine system	Organismal Systems	Up	2	5.41	A2A6Q5:Cdc27; Q63844:Mapk3
Endocrine system	Organismal Systems	Down	8	19.51	P11352:Gpx1; P51943:Ccna2; P60766:Cdc42; P62141:Ppp1cb; P63213:Gng2; P68181:Prkacb; Q6PHZ2:Camk2d; Q9CXP8:Gng10
Environmental adaptation	Organismal Systems	Up	2	5.41	Q63844:Mapk3; Q9CPQ8:Atp5mg
Environmental adaptation	Organismal Systems	Down	8	19.51	P63213:Gng2; P68181:Prkacb; Q6PHZ2:Camk2d; Q9CQ91:Ndufa3; Q9CXP8:Gng10; Q9DCS9:Ndufb10; Q9ERS2:Ndufa13; Q9Z1P6:Ndufa7
Excretory system	Organismal Systems	Up	1	2.7	Q63844:Mapk3
Excretory system	Organismal Systems	Down	3	7.32	P15920:Atp6v0a2; P51863:Atp6v0d1; P68181:Prkacb
Immune system	Organismal Systems	Up	4	10.81	P52432:Polr1c; Q63844:Mapk3; Q923G2:Polr2h; Q9D898:Arpc5l
Immune system	Organismal Systems	Down	9	21.95	P28862:Mmp3; P60766:Cdc42; P62141:Ppp1cb; P63213:Gng2; P68181:Prkacb; Q3UMR5:Mcu; Q3UYH7:Adrbk2; Q61301:Ctnna2; Q9CXP8:Gng10
Nervous system	Organismal Systems	Up	1	2.7	Q63844:Mapk3
Nervous system	Organismal Systems	Down	13	31.71	P15920:Atp6v0a2; P51863:Atp6v0d1; P60766:Cdc42; P62141:Ppp1cb; P63213:Gng2; P68181:Prkacb; Q3UYH7:Adrbk2; Q6PHZ2:Camk2d; Q9CQ91:Ndufa3; Q9CXP8:Gng10; Q9DCS9:Ndufb10; Q9ERS2:Ndufa13; Q9Z1P6:Ndufa7
Sensory system	Organismal Systems	Down	4	9.76	P62141:Ppp1cb; P68181:Prkacb; Q3UYH7:Adrbk2; Q6PHZ2:Camk2d
Amino acid metabolism	Metabolism	Up	3	8.11	E9Q5F9:Setd2; Q80SW1:Ahcyl1; Q91WK5:Gcsh
Amino acid metabolism	Metabolism	Down	2	4.88	P70351:Ezh1; Q3URE1:Acsf3
Carbohydrate metabolism	Metabolism	Up	4	10.81	P45377:Akr1b8; Q80V26:Impad1; Q91WK5:Gcsh; Q91YP0:L2hgdh
Carbohydrate metabolism	Metabolism	Down	1	2.44	P21550:Eno3
Energy metabolism	Metabolism	Up	2	5.41	Q80V26:Impad1; Q9CPQ8:Atp5mg
Energy metabolism	Metabolism	Down	6	14.63	P15920:Atp6v0a2; P51863:Atp6v0d1; Q9CQ91:Ndufa3; Q9DCS9:Ndufb10; Q9ERS2:Ndufa13; Q9Z1P6:Ndufa7
Glycan biosynthesis and metabolism	Metabolism	Up	2	5.41	O70152:Dpm1; Q9D1Q4:Dpm3
Glycan biosynthesis and metabolism	Metabolism	Down	1	2.44	Q9CXY9:Pigk
Lipid metabolism	Metabolism	Up	1	2.7	P45377:Akr1b8
Lipid metabolism	Metabolism	Down	3	7.32	P11352:Gpx1; Q3URE1:Acsf3; Q91VT4:Cbr4
Metabolism of cofactors and vitamins	Metabolism	Up	1	2.7	P45377:Akr1b8
Metabolism of other amino acids	Metabolism	Up	1	2.7	Q9CPU4:Mgst3
Metabolism of other amino acids	Metabolism	Down	1	2.44	P11352:Gpx1
Nucleotide metabolism	Metabolism	Up	1	2.7	P55264:Adk
Xenobiotics biodegradation and metabolism	Metabolism	Up	1	2.7	Q9CPU4:Mgst3
Cancer: overview	Human Diseases	Up	4	10.81	P84244:H3f3a; P84244:H3f3b; Q63844:Mapk3; Q9CPU4:Mgst3
Cancer: overview	Human Diseases	Down	13	31.71	A2AN08:Ubr4; P28862:Mmp3; P51863:Atp6v0d1; P51943:Ccna2; P60766:Cdc42; P61025:Cks1b; P62141:Ppp1cb; P63213:Gng2; P68181:Prkacb; Q61301:Ctnna2; Q6PHZ2:Camk2d; Q8VHN8:Nudt16l1; Q9CXP8:Gng10
Cancer: specific types	Human Diseases	Up	2	5.41	Q63844:Mapk3; Q9CPU4:Mgst3
Cancer: specific types	Human Diseases	Down	5	12.2	P28862:Mmp3; P60766:Cdc42; P61025:Cks1b; Q61301:Ctnna2; Q6PHZ2:Camk2d
Cardiovascular disease	Human Diseases	Up	1	2.7	Q9CPU4:Mgst3
Cardiovascular disease	Human Diseases	Down	2	4.88	P68181:Prkacb; Q61301:Ctnna2
Drug resistance: antineoplastic	Human Diseases	Up	2	5.41	Q63844:Mapk3; Q9CPU4:Mgst3
Drug resistance: antineoplastic	Human Diseases	Down	2	4.88	P68181:Prkacb; Q64430:Atp7a
Endocrine and metabolic disease	Human Diseases	Up	1	2.7	Q63844:Mapk3
Endocrine and metabolic disease	Human Diseases	Down	8	19.51	P60766:Cdc42; P62141:Ppp1cb; P68181:Prkacb; Q6PHZ2:Camk2d; Q9CQ91:Ndufa3; Q9DCS9:Ndufb10; Q9ERS2:Ndufa13; Q9Z1P6:Ndufa7
Immune disease	Human Diseases	Up	3	8.11	P62315:Snrpd1; P84244:H3f3a; P84244:H3f3b
Immune disease	Human Diseases	Down	5	12.2	P15920:Atp6v0a2; P27661:H2afx; P28862:Mmp3; P51863:Atp6v0d1; Q9QZQ8:H2afy
Infectious disease: bacterial	Human Diseases	Up	2	5.41	Q63844:Mapk3; Q9D898:Arpc5l
Infectious disease: bacterial	Human Diseases	Down	5	12.2	P15920:Atp6v0a2; P51863:Atp6v0d1; P60766:Cdc42; Q61301:Ctnna2; Q6PHZ2:Camk2d
Infectious disease: parasitic	Human Diseases	Up	1	2.7	Q63844:Mapk3
Infectious disease: parasitic	Human Diseases	Down	1	2.44	P68181:Prkacb
Infectious disease: viral	Human Diseases	Up	3	8.11	A2A6Q5:Cdc27; O88574:Sap30; Q63844:Mapk3
Infectious disease: viral	Human Diseases	Down	10	24.39	A2AN08:Ubr4; P15920:Atp6v0a2; P22892:Ap1g1; P51863:Atp6v0d1; P51943:Ccna2; P60766:Cdc42; P62141:Ppp1cb; P63213:Gng2; P68181:Prkacb; Q9CXP8:Gng10
Neurodegenerative disease	Human Diseases	Up	3	8.11	P60898:Polr2i; Q63844:Mapk3; Q923G2:Polr2h
Neurodegenerative disease	Human Diseases	Down	6	14.63	P11352:Gpx1; P68181:Prkacb; Q9CQ91:Ndufa3; Q9DCS9:Ndufb10; Q9ERS2:Ndufa13; Q9Z1P6:Ndufa7
Substance dependence	Human Diseases	Up	3	8.11	P84244:H3f3a; P84244:H3f3b; Q63844:Mapk3
Substance dependence	Human Diseases	Down	8	19.51	P27661:H2afx; P62141:Ppp1cb; P63213:Gng2; P68181:Prkacb; Q3UYH7:Adrbk2; Q6PHZ2:Camk2d; Q9CXP8:Gng10; Q9QZQ8:H2afy
Folding, sorting and degradation	Genetic Information Processing	Up	5	13.51	A2A6Q5:Cdc27; P27612:Plaa; Q61699:Hsph1; Q9QUM9:Psma6; Q9Z1F9:Uba2
Folding, sorting and degradation	Genetic Information Processing	Down	4	9.76	P21550:Eno3; Q6ZWQ7:Spcs3; Q7TMY8:Huwe1; Q9ERB0:Snap29
Replication and repair	Genetic Information Processing	Up	1	2.7	Q8BH57:Wdr48
Transcription	Genetic Information Processing	Up	5	13.51	P52432:Polr1c; P60898:Polr2i; P62315:Snrpd1; Q922U1:Prpf3; Q923G2:Polr2h
Transcription	Genetic Information Processing	Down	1	2.44	P62309:Snrpg
Translation	Genetic Information Processing	Up	4	10.81	O35972:Mrpl23; Q6ZWY3:Rps27l; Q8CFI5:Pars2; Q9D1B9:Mrpl28
Translation	Genetic Information Processing	Down	2	4.88	P62141:Ppp1cb; Q8BYM8:Cars2
Signal transduction	Environmental Information Processing	Up	4	10.81	P49443:Ppm1a; Q63844:Mapk3; Q80V26:Impad1; Q8BHJ5:Tbl1xr1
Signal transduction	Environmental Information Processing	Down	14	34.15	P21550:Eno3; P28862:Mmp3; P51943:Ccna2; P60766:Cdc42; P62141:Ppp1cb; P63213:Gng2; P68181:Prkacb; Q3UMR5:Mcu; Q3UYH7:Adrbk2; Q61301:Ctnna2; Q6PHZ2:Camk2d; Q8BVP5:Csnk1g2; Q9CXP8:Gng10; Q9JHS3:Lamtor2
Cell growth and death	Cellular Processes	Up	2	5.41	A2A6Q5:Cdc27; Q63844:Mapk3
Cell growth and death	Cellular Processes	Down	7	17.07	P27661:H2afx; P51943:Ccna2; P62141:Ppp1cb; P68181:Prkacb; Q3UMR5:Mcu; Q6PHZ2:Camk2d; Q9QZQ8:H2afy
Cell motility	Cellular Processes	Up	2	5.41	Q63844:Mapk3; Q9D898:Arpc5l
Cell motility	Cellular Processes	Down	3	7.32	P60766:Cdc42; P62141:Ppp1cb; Q91VR8:Brk1
Cellular community - eukaryotes	Cellular Processes	Up	2	5.41	P23798:Pcgf2; Q63844:Mapk3
Cellular community - eukaryotes	Cellular Processes	Down	4	9.76	P60766:Cdc42; P62141:Ppp1cb; P68181:Prkacb; Q61301:Ctnna2
Transport and catabolism	Cellular Processes	Up	5	13.51	P40336:Vps26a; P84084:Arf5; Q63844:Mapk3; Q8C0E2:Vps26b; Q9D898:Arpc5l
Transport and catabolism	Cellular Processes	Down	9	21.95	O35114:Scarb2; P15920:Atp6v0a2; P22892:Ap1g1; P51863:Atp6v0d1; P60766:Cdc42; P68181:Prkacb; Q3UYH7:Adrbk2; Q9CR26:Vta1; Q9ERB0:Snap29
